# Supplementary material for: Substantial Fat Loss in Physique Competitors Is Characterized by Increased Levels of Bile Acids, Very-Long Chain Fatty Acids, and Oxylipins
Source: MDPI journal article supplement (doi:10.3390/metabo12100928), 2022-09-30
Supplement: s1 [file s1]

# A

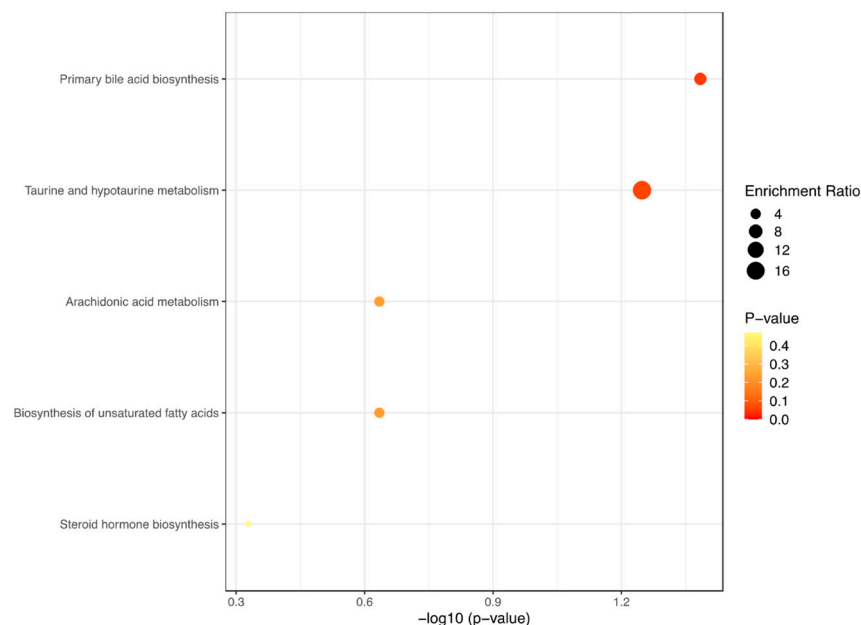

| Enriched pathways (Time*Group)          | Total | Expected | Hits | P value | Holm P | FDR |
|-----------------------------------------|-------|----------|------|---------|--------|-----|
| Primary bile acid biosynthesis          | 46    | 0.332    | 2    | 0.0413  | 1      | 1   |
| Taurine and hypotaurine metabolism      | 8     | 0.0578   | 1    | 0.0565  | 1      | 1   |
| Arachidonic acid metabolism             | 36    | 0.26     | 1    | 0.232   | 1      | 1   |
| Biosynthesis of unsaturated fatty acids | 36    | 0.26     | 1    | 0.232   | 1      | 1   |
| Steroid hormone biosynthesis            | 85    | 0.614    | 1    | 0.47    | 1      | 1   |

# B

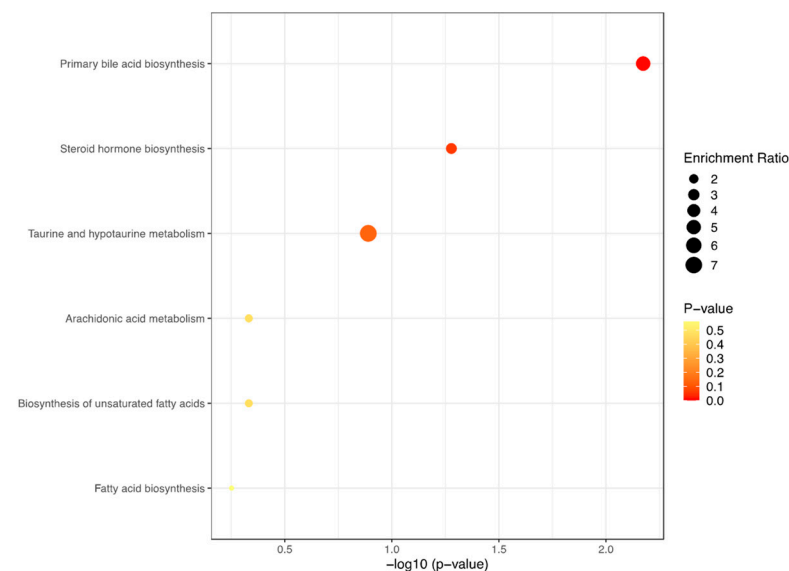

| Enriched pathways (upregulated, Time)   | Total | Expected | Hits | P value | Holm P | FDR   |
|-----------------------------------------|-------|----------|------|---------|--------|-------|
| Primary bile acid biosynthesis          | 46    | 0.786    | 4    | 0.00671 | 0.564  | 0.564 |
| Steroid hormone biosynthesis            | 85    | 1.45     | 4    | 0.0528  | 1      | 1     |
| Arachidonic acid metabolism             | 36    | 0.615    | 2    | 0.124   | 1      | 1     |
| Taurine and hypotaurine metabolism      | 8     | 0.137    | 1    | 0.129   | 1      | 1     |
| Biosynthesis of unsaturated fatty acids | 36    | 0.615    | 1    | 0.466   | 1      | 1     |
| Fatty acid biosynthesis                 | 47    | 0.803    | 1    | 0.561   | 1      | 1     |

**Supplementary Figure S1. Enrichment analysis indicates altered biological pathways and entities following intensive fat mass loss.** In Panel A, we show top pathways enriched with significantly *altered* (53 upregulated, 1 downregulated, FDR < 0.05) LC-MS metabolite features (PRE-MID in diet group when compared to controls), where color red indicates enrichment of upregulated pathway, whereas blue enrichment of downregulated pathway. From the input of 18 significantly altered known unique metabolite features, MetaboAnalyst recognized only 12 known unique metabolite features that were used to calculate the enrichment

analyses results. Subsequently, in Panel B, we show top pathways enriched with significantly *increased* ( $\text{FDR} < 0.05$ ) metabolite features (PRE-MID in diet group). From the input of 62 significantly increased unique metabolite features, MetaboAnalyst recognized 28 known unique metabolite features that were used to calculate the enrichment analyses results. Moreover, see Figure 4, for the enrichment results of downregulated metabolite features within diet group after the weight loss period. No enrichment analyses were conducted for the weight regain period (MID-POST), or in control group at any timepoint due to limited number of significant metabolites (Supplementary Table 3-4).
