# Supplementary material for: Substantial Fat Loss in Physique Competitors Is Characterized by Increased Levels of Bile Acids, Very-Long Chain Fatty Acids, and Oxylipins
Source: Metabolites. 2022 Sep 30;12(10):928. doi: 10.3390/metabo12100928 (PMC9609491; doi:10.3390/metabo12100928)
Supplement: Supplementary file 1 [file metabolites-12-00928-s001.zip › Supplementary material 1 (Tables S1-8).xlsx]

## Sheet: Content
Supplemental digital content 1 - Supplementary tables 1-8
Supplemantary Table 1. Phenotype charasteristics and their changes in the diet and control group participants throughout the study.
Supplementary Table 2. The effect of intensive fat mass loss and fat mass regain on LC-MS-Metabolome in the diet group compared to control group of physique study participants
Supplementary Table 3. The effect of intensive fat mass loss and fat mass regain on LC-MS-Metabolome in the diet group of physique study participants
Supplementary Table 4. The effect of eukaloric diet and fitness lifestyle on LC-MS-Metabolome in the control group of physique study participants
Supplementary Table 5. The effect of intensive fat mass loss and fat mass regain on LC-MS-Metabolome in the diet group compared to control group of physique study participants, when adjusted with android fat mass (DEXA)
Supplementary Table 6. The effect of intensive fat mass loss and fat mass regain on LC-MS-Metabolome in the diet group compared to control group of physique study participants, when adjusted with total fat mass (DEXA)
Supplementary Table 7. The effect of intensive fat mass loss and fat mass regain on LC-MS-Metabolome in the diet group compared to control group of physique study participants, when adjusted with physical activity
Supplementary Table 8. The effect of intensive fat mass loss and fat mass regain on LC-MS-Metabolome in the diet group compared to control group of physique study participants, when adjusted with energy availability

## Sheet: Supplementary Table 1.
Supplemantary Table 1. Phenotype charasteristics and their changes in the diet and control group participants throughout the study.
Variable	Diet group			Control group
	PRE	MID	POST	PRE	MID	POST
Age (years)	27.17 (4.28)	#	#	27.5 (3.69)	#	#
Training experience (years)	3.44 (1.42)	#	#	2.94 (0.98)	#	#
Weight (kg)	64.9 (7.01)	56.81 (5.55)*	63.39 (6.98)*	63.54 (5.19)	63.74 (5.83)	63.51 (5.71)
BMI (kg/m2	23.62 (1.82)	20.68 (1.4)*	23.09 (2.02)*	22.96 (1.31)	23.04 (1.7)	22.94 (1.56)
Fat mass (kg)	15.03 (4.51)	7.18 (2.75)*	13.08 (4.28)*	13.82 (2.71)	14.37 (2.89)	14 (2.82)
Android fat (g)	947.54 (327.61)	249.17 (147.65)*	841.88 (313.35)	876.44 (284.74)	933.44 (325.58)	864.31 (323.63)
Lean mass (kg)	47.71 (4.29)	48.3 (4.02)	48.61 (4.48)*	47.74 (3.85)	47.7 (3.77)	47.85 (3.96)
Resistance training (METh/wk)	45.33 (8.96)	46.14 (10.12)	41.73 (8.24)*	32.43 (19.44)	28.68 (14.68)	32.78 (18.12)
Aerobic exercise (METh/wk)	13.23 (10.05)	22.1 (18.16)*	11.73 (12.24)	16.74 (24.23)	11.31 (12.8)	10.69 (11.76)
Energy availability (kcal/kg/FFM/day)	36.8 (9.02)	24.5 (7.65)*	28.69 (9.03)*	40.58 (11.86)	39.46 (7.56)	45.97 (8.66)
METh/wk = metabolic equilevant hours per week. kCal = kiloCalories. FFM = free fat mass. Values are presented as mean (standard deviation, SD). Means and SD's are calculated for the physique athletes n=40 (Diet group n=24, Control group n=16) . *Statistical significant diffence from baseline (p<0.05) within Physique group comparisons. Significance was calculated with Generalized Estimation Equati…

## Sheet: Supplementary Table 2.
Supplementary Table 2. The effect of intensive fat mass loss and fat mass regain on LC-MS-Metabolome in the diet group compared to control group of physique study participants
Annotation and adduct information		PRE-MID			PRE-POST
Metabolite ID	Matching ID	Estimate	Standard error	FDR	Estimate	Standard error	FDR
Polar Molecule_TRICOSANOATE [M-H]	539374	4.658646	0.975	0.00129	-0.86505	0.623	0.811
FFA_Tricosenoic Acid [M-H]	539371	4.145334	0.923	0.00253	-0.88367	0.530	0.726
EIC_260	267578	2.391125	0.549	0.00323	0.08744	0.586	0.994
Novel EIC_5	373373	2.405839	0.583	0.00527	0.38744	0.581	0.943
Eicosanoid_13S-HpOTrE(gamma) [M-H]	387101	4.287600	1.031	0.00527	-1.57113	1.081	0.797
Polar Molecule_CORTISONE [M-H+Acetate]	106542	2.423863	0.621	0.01007	0.84252	0.613	0.811
FFA_Behenic Acid† [M-H]	540593	2.170397	0.557	0.01007	-0.41352	0.488	0.926
EIC_64	296371	6.438196	1.672	0.01055	0.76203	0.698	0.926
FFA_Behenic Acid† [M-H]	542037	3.459603	0.907	0.01091	0.08464	0.544	0.994
EIC_17	404135	3.221379	0.873	0.01143	0.42320	0.716	0.951
Novel EIC_9	424299	4.643942	1.254	0.01143	-1.42909	0.670	0.677
Polar Molecule_GAMMA-LINOLENATE [M-H]	516521	-2.068995	0.559	0.01143	0.07723	0.734	0.996
Polar Molecule_OLEOYL-GLYCEROL [M-H]	523301	5.392746	1.449	0.01143	-0.98087	1.124	0.926
FFA_Tricosenoic Acid [M-H]	542617	3.945632	1.054	0.01143	0.34720	0.613	0.951
FFA_Nervonic Acid† [M-H]	541517	2.208733	0.611	0.01426	1.54127	0.604	0.677
Bile Acid_Taurocholic Acid [M-H]	121166	7.80328	2.231	0.01742	0.80414	1.490	0.951
EIC_121	285160	3.618505	1.026	0.01742	0.24287	0.625	0.968
Eicosanoid_11,12-diHETrE [M-H+Acetate]	350152	5.619285	1.600	0.01742	0.78406	0.966	0.926
Putative_1-Oleoyl-sn-glycero-3-phosphoethanolamine	463104	3.416823	0.979	0.01742	-0.80481	0.566	0.797
Putative_N-Oleoyl-L-serine	524040	3.216667	0.914	0.01742	-0.97002	0.556	0.713
EIC_71	312209	3.628495	1.052	0.01786	0.71372	0.678	0.926
FFA_Lignoceric Acid† [M-H]	544841	3.189179	0.925	0.01786	-0.42701	0.716	0.951
FFA_Lignoceric Acid† [M-H+Acetate]	546323	4.186767	1.215	0.01786	0.42724	0.599	0.926
Novel EIC_28	457606	11.542325	3.374	0.01867	-0.42766	0.650	0.943
EIC_125	198399	5.091814	1.508	0.02106	1.22331	1.813	0.943
EIC_125	185482	7.969801	2.385	0.02309	-0.79580	0.789	0.926
EIC_69	419015	6.042096	1.815	0.02316	1.16221	1.351	0.926
EIC_69	413523	3.793568	1.143	0.02329	0.17172	0.734	0.980
Polar Molecule_CORTISONE [M-H+Acetate]	100714	2.485224	0.766	0.02630	1.11822	0.608	0.678
Bile Acid_b-Muricholic Acid [M-H]	235527	12.335895	3.791	0.02630	-6.93319	3.628	0.677
Bile Acid_b-Muricholic Acid [M-H+Acetate]	235588	12.105252	3.750	0.02630	-6.42116	3.579	0.698
EIC_271	281689	3.984874	1.231	0.02630	1.16561	0.761	0.778
EIC_69	416464	5.055466	1.566	0.02630	0.86184	1.015	0.926
FFA_Tricosanoic Acid† [M-H+Acetate]	542670	1.975319	0.613	0.02630	-0.39786	0.495	0.926
FFA_Tricosanoic Acid† [M-H]	544047	2.197871	0.672	0.02630	-0.37332	0.578	0.943
EIC_62	263579	4.267138	1.334	0.02761	-0.10337	0.681	0.994
Eicosanoid_14,15-DiHETE [M-H+Acetate]	298878	3.556596	1.115	0.02769	0.00619	0.721	0.998
FFA_Tricosanoic Acid† [M-H]	542623	1.934149	0.616	0.03215	-0.54295	0.516	0.926
EIC_345	397350	3.170358	1.016	0.03266	-1.05787	0.945	0.926
Polar Molecule_OLEOYL-GLYCEROL [M-H]	522767	4.255571	1.365	0.03266	0.44615	1.022	0.961
EIC_229	193228	1.684721	0.550	0.03760	0.33398	0.585	0.951
FFA_Lignoceric Acid† [M-H]	546284	4.291027	1.404	0.03761	0.41386	0.656	0.947
EIC_62	253339	7.549270	2.493	0.03964	-0.21504	0.888	0.980
Eicosanoid_11,12-diHETrE [M-H]	355943	2.208763	0.730	0.03964	0.62725	0.602	0.926
Eicosanoid_13,14-dihydro-15-keto-PGA2 [M-H+Acetate]	253519	5.846758	1.938	0.03984	-0.22985	0.775	0.977
EIC_73	294423	4.100046	1.365	0.03984	-0.59714	0.804	0.926
EIC_184	334912	1.950871	0.649	0.03984	0.94530	0.599	0.742
Bile Acid_Chenodeoxycholic acid [M-H]	335887	11.363136	3.796	0.04046	-7.06173	3.714	0.677
EIC_233	167632	3.581087	1.199	0.04058	0.69866	0.838	0.926
Novel EIC_9	422540	3.527410	1.190	0.04136	-1.61995	0.692	0.677
FFA_Behenic Acid† [M-H+Acetate]	542079	3.093593	1.041	0.04136	-0.32646	0.638	0.951
EIC_16	399201	2.246536	0.761	0.04157	0.13657	0.622	0.980
EIC_52	240462	3.169552	1.081	0.04322	-0.28303	0.540	0.951
Bile Acid_Chenodeoxycholic acid [M-H+Acetate]	335959	10.728413	3.700	0.04719	-6.80902	3.577	0.677
Novel EIC_8	433376	3.715366	1.286	0.04776	-0.04841	0.690	0.996
EIC_51	336280	2.392366	0.833	0.04987	-0.42463	0.738	0.951
EIC_47	197702	3.262608	1.141	0.05019	0.30384	0.864	0.971
Eicosanoid_tetranor 12(R) HETE [M-H+Acetate]	320002	2.274967	0.796	0.05019	1.38580	0.732	0.677
EIC_63	399217	3.143841	1.114	0.05518	-0.14018	0.694	0.980
Bile Acid_Glycochenodeoxycholic Acid [M-H]	255997	4.864671	1.755	0.06249	-1.77165	0.901	0.677
EIC_14	394634	5.855765	2.112	0.06249	0.33564	0.971	0.971
Eicosanoid_11-dehydro-2,3-dinor-TXB2 [M-H+Acetate]	132844	3.127551	1.135	0.06333	-0.65477	0.604	0.926
EIC_71	298732	3.137030	1.139	0.06333	-0.02572	0.780	0.996
Bile Acid_Deoxycholic Acid [M-H+Acetate]	353332	5.875352	2.131	0.06333	-3.01971	1.436	0.677
Bile Acid_Deoxycholic Acid [M-H]	353270	5.484942	2.007	0.06636	-2.88231	1.362	0.677
EIC_137	217947	2.219267	0.821	0.07154	-0.71356	0.794	0.926
Eicosanoid_9(S) HOTrE [M-H]	353929	2.258529	0.847	0.07898	-0.32665	0.639	0.951
EIC_176	379289	2.339233	0.889	0.08613	0.94915	0.547	0.713
FFA_Nervonic Acid† [M-H]	544451	2.238237	0.852	0.08613	-0.77752	0.704	0.926
Eicosanoid_15 oxoEDE [M-H+Acetate]	467225	2.734886	1.043	0.08637	0.72999	0.809	0.926
EIC_20	393655	2.962666	1.144	0.09204	-1.01056	1.033	0.926
Eicosanoid_13-HODE [M-H+Acetate]	397750	3.279406	1.266	0.09204	0.07277	0.769	0.996
EIC_125	190567	2.357230	0.915	0.09435	0.71054	1.316	0.951
Eicosanoid_13S-HpOTrE [M-H]	370062	3.148900	1.231	0.09839	-1.08112	0.628	0.713
EIC_62	256944	3.816234	1.509	0.10565	-0.32666	0.930	0.971
FAHFA_15	527360	-1.938621	0.773	0.11057	-0.35664	0.798	0.961
Bile Acid_b-Muricholic Acid [M-H]	237948	20.237391	8.146	0.11383	-8.03582	6.273	0.839
Eicosanoid_5,6-diHETrE [M-H]	390693	-2.885744	1.160	0.11383	-1.85650	0.974	0.677
EIC_10	432853	-1.214649	0.488	0.11383	0.34696	0.528	0.943
Eicosanoid_8,9-diHETrE [M-H]	357813	1.422672	0.579	0.12051	1.18826	0.650	0.678
FFA_Palmitoleic Acid† [M-H]	526135	-1.272501	0.517	0.12051	-0.00420	0.520	0.998
EIC_322	247451	1.248635	0.517	0.12611	0.41788	0.556	0.926
EIC_306	316868	1.923917	0.798	0.12611	0.09356	0.707	0.994
Bile Acid_Deoxycholic Acid [M-H+Acetate]	346895	11.238201	4.666	0.12611	-4.89029	1.772	0.677
EIC_63	392256	3.686244	1.518	0.12611	0.06637	1.274	0.996
Eicosanoid_5S-HpEPE [M-H]	400564	2.236515	0.930	0.12611	-0.12731	0.629	0.980
Putative_PGPC	448001	6.449197	2.660	0.12611	0.34815	1.291	0.980
Polar Molecule_HEPTADECANOATE [M-H]	529375	-1.439614	0.595	0.12611	0.13464	0.707	0.981
FFA_Nervonic Acid† [M-H]	545847	1.915603	0.791	0.12611	0.09514	0.669	0.994
EIC_121	298758	2.358641	0.989	0.12892	-2.54793	1.275	0.677
Eicosanoid_12S-HpEPE [M-H]	392272	2.417505	1.010	0.12892	0.19301	0.947	0.980
FAHFA_76	545467	-1.736641	0.727	0.12892	-1.46753	0.771	0.677
EIC_51	330923	2.172902	0.913	0.12966	0.31123	0.903	0.971
Putative_N-Oleoyl-L-serine	522459	2.141931	0.902	0.13006	-1.87587	0.794	0.677
Putative_Androsterone glucuronide	170446	3.210405	1.361	0.13435	-1.41427	0.588	0.677
FFA_Palmitoleic Acid† [M-H]	531843	-1.439529	0.613	0.13715	0.40423	0.688	0.951
EIC_23	437680	2.159596	0.922	0.13778	-0.49789	0.734	0.943
EIC_29	356636	1.672871	0.717	0.13966	0.47861	0.550	0.926
EIC_65	333119	4.426471	1.903	0.14096	-0.39195	0.912	0.961
EIC_267	224977	-2.086295	0.903	0.14523	0.46865	0.899	0.951
EIC_22	406441	1.578195	0.685	0.14643	-0.17687	0.719	0.980
EIC_15	406050	1.911358	0.831	0.14706	0.26679	0.716	0.970
Eicosanoid_5,6-diHETrE [M-H]	383602	1.150770	0.504	0.15087	0.63949	0.662	0.926
Polar Molecule_ERUCATE [M-H+Acetate]	533386	2.437379	1.068	0.15087	-0.19891	0.676	0.977
Bile Acid_Tauroursodeoxycholic acid [M-H]	164435	3.104500	1.368	0.15229	1.25723	1.327	0.926
FFA_Palmitoleic Acid† [M-H+Acetate]	526018	-1.201902	0.530	0.15229	0.02325	0.559	0.996
FFA_Palmitoleic Acid† [M-H]	529701	-1.296977	0.572	0.15229	0.77379	0.600	0.835
EIC_158	226291	1.583238	0.704	0.15756	-0.34446	0.917	0.969
VLCDCA_1	531095	-1.658605	0.737	0.15756	-0.99502	0.998	0.926
FAHFA_71	537708	1.904802	0.848	0.15756	0.50592	0.720	0.930
FFA_Heptadecaenoic Acid† [M-H+Acetate]	531646	6.409890	2.865	0.15805	0.31752	0.964	0.977
FFA_Tricosenoic Acid [M-H]	541791	1.949926	0.870	0.15805	-1.49384	0.638	0.677
EIC_124	240491	2.263060	1.014	0.15926	0.79791	1.224	0.943
Eicosanoid_8(S) HETrE [M-H+Acetate]	445744	2.243989	1.015	0.16458	-1.07500	1.156	0.926
FFA_Heptadecaenoic Acid† [M-H]	529369	-1.419520	0.641	0.16458	0.04934	0.710	0.996
Eicosanoid_2,3-dinor-PGE1 [M-H+Acetate]	139967	-1.043451	0.475	0.16972	-1.06599	0.613	0.713
Eicosanoid_5,6-EET [M-H]	467558	-1.438427	0.661	0.17545	-0.02966	0.619	0.996
FFA_Nervonic Acid† [M-H]	539105	2.107482	0.968	0.17545	-0.76702	0.563	0.811
Eicosanoid_11-dehydro-2,3-dinor-TXB2 [M-H+Acetate]	136286	1.495907	0.692	0.17853	-0.58964	0.605	0.926
EIC_110	433852	1.487922	0.688	0.17853	0.61276	0.683	0.926
Eicosanoid_tetranor 12(R) HETE [M-H]	322224	1.357411	0.630	0.17939	-0.21505	0.728	0.977
Putative_Levofloxacin	36118	1.312390	0.611	0.17939	0.52257	0.699	0.926
FAHFA_47	529594	-1.439379	0.668	0.17939	0.84463	1.149	0.926
FFA_Docosaenoic Acid† [M-H]	537429	1.548207	0.720	0.17939	0.32918	0.685	0.959
Putative_1-Pentadecanoyl-sn-glycero-3-phosphocholine	394443	1.250065	0.583	0.17947	-0.44409	0.570	0.926
Novel EIC_10	347387	1.582907	0.743	0.18323	-0.06071	0.693	0.996
Polar Molecule_N-ACETYLTRYPTOPHAN [M-H+Acetate]	49032	-2.287416	1.073	0.18323	-0.44564	0.929	0.959
Putative_Androsterone glucuronide	179343	4.060320	1.916	0.18691	-0.60492	0.655	0.926
EIC_62	269687	1.897779	0.899	0.18970	0.12064	0.535	0.980
Bile Acid_Ursodeoxycholic acid [M-H+Acetate]	237318	3.172477	1.534	0.20862	-1.39799	0.976	0.797
Eicosanoid_13,14-dihydro-PGE1 [M-H]	185541	1.437193	0.699	0.21369	0.12098	0.560	0.980
EIC_33	446442	1.586495	0.775	0.21620	-2.11055	1.421	0.791
VLCDCA_15	533187	-1.167393	0.571	0.21665	-0.91141	0.732	0.846
EIC_45	226969	1.284433	0.640	0.23104	0.60401	0.599	0.926
Eicosanoid_15t-Protectin D1 [M-H+Acetate]	275324	-1.344476	0.669	0.23104	-0.56392	0.613	0.926
Eicosanoid_11(12)-EpETE [M-H]	421508	-1.595849	0.792	0.23104	-0.90878	0.968	0.926
EIC_135	321522	1.953475	0.976	0.23255	0.08705	0.747	0.996
Eicosanoid_13,14-dihydro-PGE1 [M-H]	189965	-1.962694	0.985	0.23593	-1.51335	0.950	0.739
EIC_65	321476	1.812106	0.914	0.23669	-1.55130	0.688	0.677
FAHFA_22	526407	-1.048552	0.528	0.23669	0.04419	0.694	0.996
Putative_2-Hydroxypalmitic acid	525710	-0.954425	0.484	0.24221	0.04512	0.664	0.996
Eicosanoid_PGG2 [M-H+Acetate]	192014	-1.860834	0.951	0.24511	-0.96720	0.917	0.926
EIC_322	266179	1.049708	0.536	0.24511	-0.82946	0.508	0.739
Putative_Abietic acid	514832	-3.506902	1.790	0.24511	-0.95957	0.953	0.926
Putative_5a-Androstan-3a,17b-diol-17b-glucuronide	157904	-1.319561	0.676	0.24542	-1.07748	0.590	0.678
Eicosanoid_tetranor-PGFM [M-H]	31459	-1.855406	0.954	0.24806	-1.22767	1.019	0.873
Putative_PGPC	447166	6.534805	3.372	0.25072	0.39017	0.946	0.965
Putative_Levofloxacin	34432	-0.827599	0.430	0.25285	-0.61204	0.562	0.926
Polar Molecule_LUMICHROME [M-H]	51894	1.600598	0.831	0.25285	-0.33407	0.739	0.961
Putative_1-Stearoyl-2-hydroxy-sn-glycero-3-phosphoethanolamine	521802	1.095660	0.567	0.25285	0.38568	0.594	0.943
EIC_124	238208	1.274112	0.663	0.25346	0.01107	0.726	0.996
Putative_Glycocholic acid	179340	3.483801	1.819	0.25538	-1.32566	0.731	0.678
Putative_Chenodeoxycholic acid 24-acyl-b-D-glucuronide	236149	2.514027	1.316	0.25538	0.17630	0.817	0.980
EIC_310	316877	1.516183	0.794	0.25538	0.40293	0.737	0.951
Bile Acid_Ursodeoxycholic acid [M-H]	237244	3.126619	1.641	0.25679	-1.24129	1.016	0.866
EIC_176	370103	1.317046	0.695	0.25811	0.81635	0.675	0.873
EIC_68	383553	1.788759	0.943	0.25811	-0.70186	0.596	0.891
FFA_Eicosenoic Acid [M-H]	533336	-1.542283	0.814	0.25811	0.62872	0.691	0.926
Putative_Bilirubin	525957	-2.048926	1.085	0.25974	-1.59758	1.110	0.797
Eicosanoid_13,14-dihydro-PGE1 [M-H]	198449	1.564502	0.830	0.26004	1.80790	0.649	0.677
Docosanoid_7-epi-Maresin 1 [M-H+Acetate]	254854	-7.625200	4.082	0.26923	-2.90388	2.184	0.826
EIC_205	212224	1.174742	0.630	0.27001	0.34657	0.460	0.926
EIC_1	325888	1.430772	0.771	0.27067	-0.79377	0.930	0.926
Eicosanoid_Adrenic Acid [M-H]	530967	-1.134852	0.611	0.27067	0.55388	0.679	0.926
Putative_1a-Methyl-5a-androstan-3a,17b-diol glucuronide	96184	1.334919	0.720	0.27067	0.33459	1.028	0.977
Bile Acid_Glycochenodeoxycholic Acid [M-H]	237311	1.776921	0.960	0.27172	-1.01219	0.534	0.677
EIC_100	414042	1.583082	0.866	0.28458	0.01597	1.169	0.996
EIC_303	333176	1.467859	0.813	0.29717	0.12218	0.706	0.986
VLCDCA_7	539773	2.232805	1.239	0.29717	-0.62612	0.780	0.926
Eicosanoid_11t LTE4 [M-H+Acetate]	275412	1.205360	0.671	0.30003	1.41879	0.670	0.677
Putative_1,3,5(10)-Estratrien-3,17b-diol 17-glucosiduronate	271516	-1.547988	0.867	0.30056	-0.92001	0.771	0.876
EIC_100	410589	-1.306166	0.730	0.30056	-1.51540	1.084	0.803
FFA_a-linolenic Acid† [M-H]	517566	-2.067345	1.159	0.30056	-0.58909	0.810	0.926
Putative_2-Hydroxypalmitic acid	521349	-0.945451	0.529	0.30056	1.49024	0.628	0.677
Polar Molecule_CORTISONE [M-H]	112369	-0.954469	0.536	0.30140	0.04457	0.526	0.996
Polar Molecule_CORTISONE [M-H+Acetate]	112455	-1.045674	0.592	0.30252	-0.02564	0.569	0.996
Eicosanoid_13(S) HOTrE(y) [M-H]	373917	1.889720	1.066	0.30252	-1.24123	0.821	0.782
EIC_95	408174	-1.064211	0.601	0.30252	-0.32786	0.724	0.961
EIC_15	410919	-1.362350	0.770	0.30252	-1.23601	0.944	0.826
FAHFA_69	545400	1.998303	1.131	0.30252	-0.28858	1.062	0.980
EIC_312	348127	1.326483	0.757	0.30764	0.36189	0.652	0.951
FFA_Linoleic Acid† [M-H]	526174	-1.062672	0.607	0.30764	0.17488	0.764	0.980
VLCDCA_1	532475	-1.250158	0.714	0.30764	-0.69540	0.679	0.926
Polar Molecule_GLYCOCHOLATE [M-H]	172623	3.522701	2.030	0.30978	-1.68367	0.798	0.677
Eicosanoid_13(S) HOTrE(y) [M-H]	378072	1.901274	1.096	0.30978	0.19199	0.671	0.980
Eicosanoid_5,6-EET [M-H+Acetate]	470913	1.641368	0.945	0.30978	-0.74727	0.792	0.926
Endocannabinoid_Oleoyl Ethanolamide [M-H+Acetate]	520172	-1.140652	0.654	0.30978	-3.06721	1.720	0.705
FFA_Myristic Acid [M-H+Acetate]	522387	-1.356950	0.782	0.30978	0.12070	0.813	0.994
EIC_303	328235	1.205254	0.698	0.31384	-0.17194	0.861	0.981
EIC_122	358178	1.517701	0.886	0.32105	-0.73042	0.971	0.926
EIC_178	254050	-7.314616	4.280	0.32254	-3.63667	2.559	0.797
Polar Molecule_GLYCOCHOLATE [M-H]	170444	2.353085	1.391	0.33123	-1.23494	0.539	0.677
Eicosanoid_13(S) HOTrE [M-H+Acetate]	365619	1.225546	0.725	0.33123	-0.03863	0.905	0.996
Eicosanoid_PGG2 [M-H+Acetate]	184987	-1.766927	1.048	0.33135	-0.24271	1.012	0.980
Novel EIC_24	466757	1.485525	0.881	0.33135	-0.05337	1.101	0.996
EIC_250	199108	-0.886286	0.528	0.33418	0.20386	0.574	0.971
Polar Molecule_NERVONATE [M-H+Acetate]	536198	1.644618	0.980	0.33418	-1.37662	0.711	0.677
Putative_Androsterone glucuronide	172624	3.787755	2.268	0.33474	-1.71998	0.886	0.677
EIC_80	358635	-3.051030	1.828	0.33474	-1.00000	0.710	0.797
EIC_9	408763	-1.284883	0.770	0.33474	-0.76918	0.902	0.926
EIC_110	437709	1.386972	0.832	0.33474	0.36069	1.075	0.972
EIC_156	264493	0.933283	0.561	0.33508	0.36495	0.613	0.951
Eicosanoid_LTB4 ethanol amide [M-H+Acetate]	227844	1.421629	0.861	0.34328	1.52042	1.047	0.797
EIC_26	441431	1.212435	0.738	0.34645	0.35310	0.777	0.961
Eicosanoid_13,14-dihydro-15-keto-PGE1 [M-H]	215016	-3.869897	2.362	0.34654	-0.76535	1.447	0.951
Novel EIC_13	426801	1.715348	1.048	0.34654	0.46897	1.086	0.961
EIC_86	450186	-0.915443	0.563	0.35204	-0.98201	0.582	0.726
EIC_329	263763	0.918618	0.566	0.35278	0.45012	0.656	0.939
Eicosanoid_8,9-diHETrE [M-H+Acetate]	365688	1.476806	0.911	0.35278	0.71623	0.909	0.926
FFA_Behenic Acid† [M-H]	539090	1.218666	0.762	0.36641	0.41958	0.917	0.961
EIC_205	208847	1.028767	0.645	0.36895	-0.01046	0.545	0.996
EIC_80	365075	1.361896	0.858	0.37224	0.61193	0.876	0.932
EIC_137	228394	0.811000	0.513	0.37351	-0.02570	0.575	0.996
EIC_101	433368	0.996292	0.630	0.37351	0.29104	0.599	0.959
Putative_2-Hydroxypalmitic acid	518068	-1.062379	0.673	0.37452	-0.49918	0.693	0.926
Bile Acid_Glycoursodeoxycholic Acid [M-H]	169245	1.536670	0.977	0.37683	-0.32271	0.736	0.961
EIC_156	253384	0.920478	0.587	0.37800	0.83968	0.981	0.926
FFA_Myristic Acid [M-H]	522346	-1.206120	0.771	0.37954	0.03056	0.784	0.996
EIC_41	183510	1.472559	0.943	0.37967	0.04900	0.705	0.996
EIC_150	301803	0.687086	0.441	0.38176	0.25096	0.624	0.965
EIC_232	222789	0.999750	0.645	0.38582	0.83020	0.724	0.913
Polar Molecule_TRICOSANOATE [M-H]	540604	0.959540	0.621	0.38812	-0.96035	0.466	0.677
Eicosanoid_5,6-diHETrE [M-H]	386644	-1.256282	0.820	0.39305	-1.35064	1.020	0.826
EIC_77	435704	1.201892	0.784	0.39305	-0.08195	0.968	0.996
FFA_Pentadecanoic Acid† [M-H]	528566	-1.005581	0.656	0.39305	-0.65837	0.786	0.926
EIC_225	261389	-0.887454	0.581	0.39477	-0.10917	0.583	0.981
Polar Molecule_CORTISOL [M-H]	107951	1.411941	0.927	0.39520	0.13152	0.703	0.981
EIC_169	349398	1.116028	0.734	0.39520	0.90809	0.643	0.797
FAHFA_62	533738	-1.195556	0.787	0.39520	-1.47575	0.916	0.739
Eicosanoid_PGE3 [M-H+Acetate]	148936	0.937877	0.620	0.39808	0.06446	0.548	0.996
Novel EIC_6	225577	-0.911431	0.606	0.39872	-1.05377	0.834	0.844
Putative_Chenodeoxycholic acid 24-acyl-b-D-glucuronide	232936	2.133879	1.414	0.39872	-0.97265	0.715	0.811
EIC_109	403246	-6.608050	4.395	0.39872	-0.58645	4.378	0.994
Eicosanoid_12S-HpETE [M-H]	430722	-1.085428	0.720	0.39872	-2.11261	0.938	0.677
FFA_Arachidic Acid† [M-H]	536380	1.656830	1.103	0.39872	-0.74430	1.133	0.943
EIC_318	136905	0.815076	0.559	0.40608	-0.27001	0.474	0.951
Putative_5a-Androstan-3a,17b-diol-17b-glucuronide	150234	-1.169788	0.802	0.40608	-0.65741	0.777	0.926
Bile Acid_Glycochenodeoxycholic Acid [M-H]	251495	4.379602	3.000	0.40608	-1.81007	0.738	0.677
Eicosanoid_LTF4 [M-H]	266556	-1.332274	0.914	0.40608	0.87644	0.597	0.797
Eicosanoid_tetranor-PGFM [M-H]	29345	-1.062108	0.729	0.40608	-0.36886	0.764	0.959
EIC_135	324550	1.438867	0.968	0.40608	0.04532	0.814	0.996
EIC_343	395749	1.543864	1.058	0.40608	-2.42002	1.217	0.677
EIC_185	397724	-1.207457	0.813	0.40608	-0.25227	0.749	0.972
EIC_194	407696	1.529021	1.033	0.40608	0.50393	0.793	0.946
Eicosanoid_15S-HpETE [M-H]	413128	0.953987	0.644	0.40608	-0.97229	0.628	0.767
Eicosanoid_12-HETE [M-H+Acetate]	425444	1.138275	0.765	0.40608	-0.38538	0.911	0.961
Polar Molecule_ROSMARINATE [M-H]	46338	0.906536	0.619	0.40608	0.56735	0.939	0.951
Eicosanoid_5,6-EET [M-H]	469222	-0.870801	0.589	0.40608	0.42512	0.584	0.926
FFA_Pentadecanoic Acid† [M-H]	530326	-0.880756	0.596	0.40608	-0.35319	0.813	0.961
FFA_Dihomo-g-linolenic† [M-H]	530664	-0.700351	0.477	0.40608	0.51964	0.678	0.926
VLCDCA_28	542127	0.989226	0.673	0.40608	0.08683	0.693	0.995
EIC_139	211121	1.331131	0.917	0.40674	-0.95006	0.914	0.926
Endocannabinoid_Arachidonoyl Ethanolamide [M-H+Acetate]	479677	-0.712233	0.490	0.40674	0.39679	0.693	0.951
VLCDCA_26	535393	-0.952276	0.657	0.40674	-1.11208	0.712	0.754
Polar Molecule_allo-Tetrahydrocortisol [M-H+Acetate]	84478	0.919209	0.637	0.40994	-0.03052	0.795	0.996
Eicosanoid_13,14-dihydro-PGF1a [M-H]	190593	-1.877499	1.303	0.41027	-0.04657	0.761	0.996
FAHFA_48	528338	1.033244	0.720	0.41375	1.73176	0.804	0.677
Docosanoid_Resolvin E1 [M-H+Acetate]	110221	0.795782	0.560	0.41741	0.37642	0.607	0.951
Eicosanoid_7,17 dhDPA [M-H+Acetate]	289392	0.697903	0.489	0.41741	0.24799	0.518	0.959
EIC_166	350670	1.813022	1.279	0.41741	-0.40287	0.818	0.959
EIC_108	414045	1.086743	0.765	0.41741	0.11950	0.972	0.995
EIC_31	407392	1.073379	0.759	0.41956	1.45227	0.778	0.678
Bile Acid_Glycochenodeoxycholic Acid [M-H]	247605	1.488879	1.059	0.42274	-1.44364	0.778	0.678
Polar Molecule_THYMIDINE-MONOPHOSPHATE [M-H+Acetate]	35550	-0.880884	0.627	0.42274	-1.77828	0.820	0.677
EIC_157	292929	1.195223	0.854	0.42566	-0.54874	0.736	0.926
Putative_Monolinolenin (9c,12c,15c)	343482	0.838454	0.602	0.42891	0.87412	0.612	0.797
Putative_2a-Methyl-5a-androstan-3a-ol-17-one glucuronide	98088	0.932547	0.677	0.44089	0.13878	0.789	0.985
Eicosanoid_PDX [M-H+Acetate]	282516	1.064091	0.775	0.44123	0.76114	0.816	0.926
FFA_Heptadecaenoic Acid† [M-H+Acetate]	529424	-0.726930	0.533	0.44700	-0.03988	0.687	0.996
FAHFA_21	526086	-0.859640	0.632	0.44755	0.04091	0.651	0.996
EIC_181	341438	0.782921	0.577	0.44823	0.55556	0.781	0.926
Eicosanoid_8-iso-PGA2 [M-H+Acetate]	222096	0.895859	0.664	0.45152	-0.17871	0.637	0.980
FFA_a-linolenic Acid† [M-H]	527674	0.947191	0.702	0.45152	0.31089	0.750	0.965
VLCDCA_34	544601	-0.626071	0.465	0.45152	-1.19004	0.485	0.677
Putative_Bilirubin	528314	-0.945862	0.704	0.45185	0.33825	0.692	0.959
VLCDCA_14	540389	1.618666	1.205	0.45185	-1.43345	1.081	0.826
Bile Acid_Glycoursodeoxycholic Acid [M-H+Acetate]	181294	-0.987106	0.739	0.45601	-0.20294	0.581	0.971
Polar Molecule_CORTICOSTERONE [M-H+Acetate]	140738	-0.811624	0.609	0.45796	-1.00857	0.555	0.678
Polar Molecule_allo-Tetrahydrocortisol [M-H+Acetate]	97322	-1.170450	0.883	0.46206	0.37640	0.733	0.951
EIC_105	382736	0.737831	0.559	0.46516	0.74417	0.576	0.835
Polar Molecule_CORTEXOLONE [M-H+Acetate]	159612	-0.756768	0.576	0.46645	-1.17235	0.591	0.677
Novel EIC_14	448206	1.388859	1.058	0.46645	0.47621	0.965	0.959
Docosanoid_osbond acid, all-cis-4,7,10,13,16-DPA [M-H]	528114	-0.724827	0.552	0.46645	1.65069	0.635	0.677
Putative_1a-Methyl-5a-androstan-3a,17b-diol glucuronide	100107	-0.840210	0.644	0.46921	-0.36362	0.676	0.951
Eicosanoid_12-oxoETE [M-H]	423400	-0.879673	0.674	0.46921	0.14664	0.746	0.981
VLCDCA_11	533173	-0.930002	0.714	0.46921	0.09807	0.708	0.994
VLCDCA_17	532515	-0.804903	0.620	0.47166	-0.92930	0.774	0.873
Eicosanoid_11-HETE [M-H+Acetate]	423143	0.943338	0.729	0.47200	-0.74129	0.695	0.926
Endocannabinoid_N-oleoyl Dopamine [M-H]	528189	-0.982133	0.759	0.47200	-0.01125	0.849	0.996
VLCDCA_14	541584	1.432140	1.108	0.47200	-0.26414	0.882	0.977
Putative_11a-Hydroxyprogesterone b-D-glucuronide	269360	0.954206	0.743	0.47687	-1.41204	1.061	0.826
EIC_250	195182	-0.726511	0.568	0.47933	0.01139	0.605	0.996
FAHFA_59	532202	-0.883164	0.691	0.47933	-0.45216	0.808	0.951
Putative_Dodecylbenzenesulfonic acid	399899	1.248585	0.981	0.48169	-0.69973	0.976	0.926
Polar Molecule_ELAIDATE [M-H+Acetate]	527688	0.926357	0.729	0.48190	1.19771	0.938	0.839
Bile Acid_Ursodeoxycholic acid [M-H+Acetate]	241332	1.205758	0.959	0.48917	0.68888	0.606	0.915
Putative_4-[5-[[4-[5-[acetyl(hydroxy)amino]pentylamino]-4-oxobutanoyl]-hydroxyamino]pentylamino]-4-oxobutanoic acid	381293	-0.966794	0.769	0.48917	0.46759	0.834	0.951
FFA_Eicosenoic Acid [M-H]	531994	-0.808504	0.643	0.48917	-0.29983	0.865	0.971
Sterol_Estrone [M-H+Acetate]	202817	1.866522	1.489	0.49041	0.59880	0.925	0.943
EIC_138	199063	0.684927	0.551	0.49761	0.07390	0.543	0.994
Putative_N-oleoyl taurine	497820	-0.691168	0.557	0.49761	-0.21171	0.589	0.971
VLCDCA_1	533929	0.762427	0.616	0.49920	-0.59523	0.686	0.926
FFA_Heptadecaenoic Acid† [M-H+Acetate]	532124	1.007002	0.817	0.50196	1.57440	0.917	0.713
EIC_263	204232	0.608948	0.499	0.50776	-0.70705	0.556	0.841
Eicosanoid_Adrenic Acid [M-H]	532126	-0.775184	0.635	0.50776	0.25242	0.797	0.977
FFA_Arachidic Acid† [M-H+Acetate]	534912	0.985226	0.805	0.50776	0.18680	0.828	0.980
FAHFA_11	521853	-1.205867	0.992	0.50998	-1.18540	1.314	0.926
Eicosanoid_11-dehydro-2,3-dinor-TXB2 [M-H+Acetate]	143490	-0.944825	0.780	0.51217	-0.00390	0.777	0.998
VLCDCA_6	532891	-1.308961	1.085	0.51310	-1.09232	1.062	0.926
VLCDCA_23	535937	-0.773066	0.640	0.51310	-1.08266	0.682	0.739
FFA_Eicosenoic Acid [M-H+Acetate]	534432	0.839569	0.700	0.51803	-0.35111	0.720	0.959
Eicosanoid_PGF1a [M-H]	164760	0.663138	0.555	0.51911	0.03177	0.574	0.996
FAHFA_14	522914	-0.874723	0.734	0.51911	-0.11674	0.651	0.984
FFA_Adrenic Acid† [M-H]	528116	-0.726479	0.609	0.51911	1.59928	0.694	0.677
EIC_251	291460	4.232244	3.572	0.52069	2.70248	3.579	0.926
Polar Molecule_GAMMA-LINOLENATE [M-H+Acetate]	518129	3.894224	3.285	0.52069	3.14518	3.257	0.926
FFA_Arachidic Acid† [M-H]	541489	0.841911	0.709	0.52069	-0.65457	0.679	0.926
Putative_Chenodeoxycholic acid 24-acyl-b-D-glucuronide	242299	1.898658	1.611	0.52466	-0.77461	0.820	0.926
Putative_Oxymorphone 3-b-D-glucuronide	90626	-1.824563	1.567	0.53543	1.62802	1.093	0.791
EIC_1	310243	-1.026236	0.892	0.54441	-1.39379	1.482	0.926
Putative_1-Stearoyl-2-hydroxy-sn-glycero-3-phosphoethanolamine	525188	0.664764	0.585	0.55524	0.37790	0.672	0.951
Eicosanoid_15k PGF2a [M-H+Acetate]	109511	0.613718	0.545	0.56119	0.51518	0.626	0.926
VLCDCA_1	531896	-0.999126	0.887	0.56119	0.10780	1.035	0.996
EIC_58	342155	1.747708	1.576	0.57579	-1.28109	1.512	0.926
Eicosanoid_13,14-dihydro-15-keto-tetranor-PGF1alpha [M-H+Acetate]	125021	0.694406	0.630	0.57674	1.23798	0.633	0.677
Eicosanoid_PGE3 [M-H+Acetate]	145653	0.649340	0.588	0.57674	-0.14074	0.627	0.980
Eicosanoid_15 oxoEDE [M-H]	479072	-0.694619	0.630	0.57674	-0.24896	0.688	0.971
VLCDCA_23	533191	-0.813820	0.743	0.58113	0.18029	0.690	0.980
EIC_83	344675	0.535335	0.491	0.58373	0.17179	0.492	0.971
FFA_Palmitic Acid† [M-H+Acetate]	534889	0.770224	0.707	0.58373	0.68445	0.849	0.926
FFA_Linoleic Acid† [M-H+Acetate]	528408	1.105916	1.021	0.58782	2.37931	1.100	0.677
Eicosanoid_PGF1a [M-H]	171489	-0.782010	0.724	0.58882	0.14235	0.703	0.980
Bile Acid_Lithocholic Acid [M-H]	441724	0.680056	0.640	0.60322	0.17244	0.647	0.980
Endocannabinoid_N-arachidonoyl Dopamine [M-H]	515028	-0.775336	0.731	0.60322	0.37641	0.871	0.961
Putative_Heneicosapentaenoic acid	524788	-1.025698	0.975	0.61031	1.13735	0.927	0.864
EIC_29	354579	1.104261	1.053	0.61192	0.41507	0.696	0.951
EIC_31	411585	-0.682386	0.652	0.61192	-1.00228	0.881	0.915
EIC_122	368273	0.951185	0.911	0.61241	-0.35737	0.949	0.969
Eicosanoid_EPA [M-H+Acetate]	523035	0.541302	0.521	0.61303	0.44465	0.571	0.926
FFA_a-linolenic Acid† [M-H]	521670	-0.755133	0.728	0.61322	-0.17638	0.928	0.981
Novel EIC_6	221883	-0.590370	0.570	0.61379	-2.20538	1.303	0.726
Sterol_11-keto-testosterone [M-H+Acetate]	157340	-0.700080	0.682	0.61545	-0.53447	0.726	0.926
Putative_5a-Androstan-17b-ol-3-one glucosiduronate	201784	-1.296291	1.265	0.61545	-0.02298	0.987	0.996
Eicosanoid_15-epi-PGA1 [M-H+Acetate]	253524	0.582026	0.565	0.61545	0.38962	0.532	0.926
Eicosanoid_DHA [M-H]	525743	-0.618971	0.604	0.61545	0.32356	0.718	0.961
Polar Molecule_LUMICHROME [M-H]	54898	2.145222	2.092	0.61545	-1.19275	0.713	0.726
VLCDCA_23	534469	-0.695932	0.681	0.61628	-1.14588	0.688	0.726
Eicosanoid_13,14-dihydro-PGE1 [M-H]	195187	-0.615432	0.610	0.61806	0.64031	0.657	0.926
EIC_71	305288	1.176809	1.166	0.61806	-1.97097	1.199	0.735
FFA_a-linolenic Acid† [M-H]	523928	-0.517889	0.510	0.61806	0.18865	0.731	0.980
VLCDCA_1	534965	1.035452	1.022	0.61806	0.01430	1.028	0.996
VLCDCA_40	537628	0.812902	0.806	0.61806	-0.53824	0.746	0.926
Putative_3-Hydroxystanozolol glucuronide	281952	-0.834789	0.833	0.62065	0.35243	0.858	0.965
EIC_55	297605	0.621013	0.621	0.62065	0.04577	0.775	0.996
FFA_Myristic Acid [M-H]	527646	0.662042	0.662	0.62065	-0.30837	0.638	0.959
FFA_Eicosadienoic Acid† [M-H]	531992	-0.546662	0.545	0.62065	0.65763	0.618	0.926
Bile Acid_Glycoursodeoxycholic Acid [M-H]	166774	0.963883	0.974	0.62603	-0.60608	0.679	0.926
EIC_178	244703	0.500931	0.505	0.62603	-0.01981	0.596	0.996
EIC_188	171462	-0.609908	0.617	0.62607	-1.02854	0.589	0.713
EIC_135	316724	0.860163	0.884	0.63841	-0.70684	1.016	0.933
Putative_5a-Androstan-3a,17b-diol-17b-glucuronide	159009	-0.680745	0.709	0.64270	-0.71403	0.849	0.926
EIC_303	338181	0.694216	0.720	0.64270	-0.05469	0.680	0.996
Endocannabinoid_N-arachidonoyl Dopamine [M-H+Acetate]	518573	-0.601538	0.626	0.64270	0.47588	0.629	0.926
FAHFA_56	530580	0.779047	0.807	0.64270	-0.50912	0.931	0.951
FFA_Docosatrienoic Acid† [M-H]	532415	-0.603379	0.626	0.64270	0.84621	0.723	0.896
EIC_224	298220	0.743139	0.782	0.65094	-0.71432	0.985	0.926
Eicosanoid_11(12)-EpETE [M-H]	416960	0.502209	0.535	0.65590	0.42344	0.482	0.926
EIC_102	446037	-0.651439	0.692	0.65590	-0.10150	0.700	0.994
FFA_Oleic Acid† [M-H+Acetate]	532675	0.785883	0.836	0.65590	-0.00222	0.994	0.998
EIC_122	365097	1.154851	1.240	0.66044	-0.98509	1.127	0.926
Putative_Decylbenzenesulfonic acid	418979	1.192003	1.278	0.66044	-1.10402	1.101	0.926
VLCDCA_38	530224	-0.634806	0.683	0.66044	-0.81433	0.726	0.926
Polar Molecule_N-ACETYLTRYPTOPHAN [M-H]	45049	0.803164	0.866	0.66057	-1.51195	0.778	0.677
Eicosanoid_13,14-dihydro-15-keto-tetranor-PGF1alpha [M-H+Acetate]	129125	0.548311	0.596	0.66426	1.89124	0.621	0.677
Eicosanoid_11-dehydro-TXB3 [M-H+Acetate]	146386	-0.399371	0.439	0.67219	0.33381	0.416	0.926
Eicosanoid_14,15 LTD4 [M-H+Acetate]	258994	0.554650	0.616	0.67529	0.81937	0.893	0.926
EIC_14	387514	1.060127	1.176	0.67529	-1.98625	0.910	0.677
Endocannabinoid_Oleoyl Ethanolamide [M-H+Acetate]	522175	0.540263	0.600	0.67529	-0.08040	0.869	0.996
VLCDCA_42	540422	0.651615	0.722	0.67529	-0.47031	0.704	0.943
Eicosanoid_Arachidonic Acid [M-H+Acetate]	531873	0.695635	0.780	0.68112	1.81857	0.863	0.677
EIC_144	256466	0.644301	0.726	0.68409	-0.28024	0.923	0.977
Eicosanoid_tetranor 12(R) HETE [M-H]	331464	0.645693	0.736	0.69207	-0.55562	0.742	0.926
Eicosanoid_18(+/-)-HETE [M-H+Acetate]	374735	-0.607311	0.694	0.69210	-1.68834	1.580	0.926
FAHFA_18	522272	-0.491146	0.562	0.69260	0.84615	0.882	0.926
EIC_146	239745	0.433494	0.500	0.69309	-0.20298	0.438	0.961
Eicosanoid_17,18-DiHETE [M-H+Acetate]	263807	0.587649	0.675	0.69309	0.18922	0.642	0.977
EIC_185	398537	-0.604457	0.698	0.69309	-0.77314	0.692	0.926
FFA_Heptadecanoic Acid† [M-H+Acetate]	534128	0.487640	0.563	0.69309	0.72487	0.816	0.926
EIC_358	269922	-0.520163	0.603	0.69407	-0.96856	0.642	0.782
Novel EIC_44	186232	-0.474991	0.554	0.69686	-1.12546	0.742	0.782
FFA_Oleic Acid† [M-H]	535786	-0.520769	0.608	0.69686	0.38450	0.735	0.951
EIC_177	274066	-0.867958	1.017	0.69850	0.19428	0.825	0.980
Putative_7a,17a-Dimethyl-5b-androstane-3a,17b-diol glucuronide	210760	-0.983179	1.163	0.70017	-1.25230	1.655	0.926
EIC_225	266128	-0.617127	0.727	0.70017	1.09151	0.688	0.739
FFA_Stearidonic Acid [M-H]	488156	-1.298932	1.539	0.70017	-1.60799	1.579	0.926
Eicosanoid_EPA [M-H]	523009	0.438433	0.520	0.70017	0.23282	0.548	0.961
Eicosanoid_DHA [M-H]	523275	-0.697790	0.827	0.70017	0.03239	1.285	0.996
Eicosanoid_15-epi-PGA1 [M-H+Acetate]	244131	0.534822	0.637	0.70221	0.26068	0.746	0.971
FFA_Linoleic Acid† [M-H+Acetate]	526555	1.391498	1.675	0.70894	0.36964	1.707	0.980
EIC_88	373969	0.742623	0.896	0.70895	0.45601	0.809	0.951
EIC_79	252002	0.439204	0.535	0.71120	0.73499	0.586	0.846
Docosanoid_7,8-DiHDPA [M-H]	364273	-0.473298	0.575	0.71120	0.37145	0.510	0.926
EIC_15	412685	-0.747163	0.912	0.71120	-0.52765	1.008	0.951
FFA_Heptadecaenoic Acid† [M-H]	531845	-0.419862	0.511	0.71120	-0.24305	0.705	0.971
Putative_Tauroursodeoxycholic acid	181279	-0.791498	0.981	0.72194	-0.77035	1.324	0.951
Eicosanoid_Arachidonic Acid [M-H]	525365	-0.557266	0.699	0.72997	-0.02947	0.756	0.996
Eicosanoid_5(S) HETrE [M-H]	501853	-0.404330	0.513	0.73431	1.13576	0.559	0.677
FFA_Pentadecanoic Acid† [M-H]	527657	0.608901	0.773	0.73431	-0.11067	0.781	0.994
VLCDCA_41	540711	0.697590	0.883	0.73431	-0.14935	0.905	0.990
Putative_Hydrocortisone	107173	0.406771	0.525	0.73615	-1.06800	0.493	0.677
EIC_229	184258	0.432299	0.554	0.73615	0.23475	0.535	0.961
EIC_178	245971	-1.325022	1.705	0.73615	-1.41493	1.489	0.926
Putative_3-Hydroxystanozolol glucuronide	271639	-0.789494	1.015	0.73615	0.77046	0.979	0.926
EIC_224	295140	0.448165	0.576	0.73615	-0.60606	0.611	0.926
FFA_Palmitic Acid† [M-H+Acetate]	531306	-0.555152	0.718	0.73615	0.31285	0.818	0.968
FFA_Eicosenoic Acid [M-H]	539066	-0.517670	0.667	0.73615	0.63525	0.680	0.926
Polar Molecule_LUMICHROME [M-H]	57910	2.007030	2.602	0.73665	-0.82569	1.190	0.933
EIC_10	440807	1.990765	2.595	0.73895	-0.46823	0.558	0.926
VLCDCA_17	534730	-0.631156	0.829	0.74290	0.23765	0.932	0.980
Eicosanoid_12epi LTB4 [M-H+Acetate]	285289	0.557200	0.735	0.74414	-0.20880	0.686	0.977
Putative_7-Keto-3a,12-a-dihydroxycholanic acid	173610	0.593271	0.788	0.74787	1.10838	0.772	0.797
FFA_Arachidic Acid† [M-H+Acetate]	537842	0.512562	0.683	0.74912	0.48313	0.767	0.947
Putative_6-((E)-2-((1R,2S,3R,5S)-3,5-Dihydroxy-2-((Z)-oct-2-enyl)cyclopentyl)vinyl)tetrahydro-2H-pyran-2-one	167035	-0.522799	0.706	0.75283	0.13214	0.509	0.980
Docosanoid_7(S),17(S)-hydroxy DPA [M-H+Acetate]	263855	0.468325	0.633	0.75283	-0.50412	0.684	0.926
EIC_122	361269	0.568829	0.765	0.75283	-0.09434	0.739	0.995
EIC_189	392686	0.464779	0.626	0.75283	0.80334	0.590	0.811
EIC_250	186140	0.578896	0.794	0.75836	0.15228	0.724	0.980
FFA_Eicosadienoic Acid† [M-H+Acetate]	531329	1.231800	1.688	0.75836	2.61510	1.723	0.782
VLCDCA_12	535370	-0.467136	0.639	0.75836	-0.16450	0.839	0.981
Eicosanoid_14,15 LTC4 [M-H]	264928	0.891558	1.227	0.75847	2.75422	1.662	0.726
Putative_4-[5-[[4-[5-[acetyl(hydroxy)amino]pentylamino]-4-oxobutanoyl]-hydroxyamino]pentylamino]-4-oxobutanoic acid	390962	-0.430743	0.603	0.76953	0.61045	0.732	0.926
Novel EIC_13	423715	-0.462425	0.655	0.77483	-0.31641	0.804	0.965
VLCDCA_34	539456	-0.436333	0.619	0.77483	-0.60755	0.697	0.926
EIC_257	249793	0.439163	0.626	0.77650	-0.10870	0.741	0.994
EIC_138	191819	0.769714	1.105	0.77834	-0.17126	1.051	0.990
EIC_205	215007	0.360233	0.517	0.77834	-0.06288	0.582	0.996
FFA_Palmitoleic Acid† [M-H+Acetate]	523988	0.649494	0.935	0.77881	-1.42584	0.848	0.726
EIC_106	378136	-0.656952	0.956	0.77901	-1.30926	1.026	0.839
EIC_87	387542	0.427428	0.617	0.77901	-0.20568	0.647	0.977
Novel EIC_1	405831	0.455063	0.661	0.77901	0.56015	0.795	0.930
Polar Molecule_LUMICHROME [M-H]	63608	1.455893	2.118	0.77901	-0.39097	1.311	0.977
EIC_333	191164	-0.422950	0.629	0.78031	0.21226	0.684	0.977
Bile Acid_Ursodeoxycholic acid [M-H+Acetate]	232137	0.561999	0.836	0.78031	0.70099	0.988	0.926
EIC_146	245286	-0.754453	1.124	0.78031	-0.20776	0.820	0.980
Polar Molecule_BIOTIN [M-H]	31198	0.373421	0.557	0.78031	-0.48436	0.757	0.943
Putative_Monolinolenin (9c,12c,15c)	341483	0.291711	0.434	0.78031	0.67020	0.503	0.826
Putative_N-Oleoyl-L-serine	517674	0.418107	0.620	0.78031	0.38692	0.713	0.951
Eicosanoid_EPA [M-H]	518723	-0.407370	0.602	0.78031	0.38393	0.572	0.943
Polar Molecule_MYRISTATE [M-H]	519152	0.468302	0.686	0.78031	-0.25770	0.679	0.968
Polar Molecule_OLEOYL-GLYCEROL [M-H+Acetate]	527254	-0.562767	0.831	0.78031	0.23676	0.857	0.980
FFA_Dihomo-g-linolenic† [M-H]	529407	-0.410162	0.616	0.78177	0.88603	0.762	0.904
FAHFA_42	531450	-0.488190	0.733	0.78177	-0.20979	0.821	0.980
Eicosanoid_11-dehydro-2,3-dinor-TXB2 [M-H+Acetate]	128452	0.463508	0.698	0.78213	-0.42308	0.764	0.951
Putative_7a,17a-Dimethyl-5b-androstane-3a,17b-diol glucuronide	203097	-1.199771	1.819	0.78449	-1.05931	1.929	0.951
EIC_263	208281	0.310726	0.478	0.78991	-0.32062	0.561	0.951
Polar Molecule_OLEOYL-GLYCEROL [M-H+Acetate]	528185	-0.626697	0.966	0.78991	0.53750	1.061	0.951
FAHFA_8	518912	-0.453968	0.704	0.79193	0.48992	0.670	0.926
Polar Molecule_CORTEXOLONE [M-H]	153590	-0.452677	0.735	0.79388	-1.36276	0.772	0.713
Putative_11a-Hydroxyprogesterone b-D-glucuronide	282628	-0.461994	0.750	0.79388	-0.58542	0.886	0.943
Bile Acid_Chenodeoxycholic acid [M-H+Acetate]	329139	1.459365	2.358	0.79388	-0.84192	1.966	0.961
EIC_189	389030	-0.375208	0.600	0.79388	0.18326	0.727	0.980
Eicosanoid_11(12)-EpETE [M-H+Acetate]	421573	-0.486335	0.777	0.79388	-0.62231	0.768	0.926
Polar Molecule_PALMITOLEATE [M-H+Acetate]	520124	0.383817	0.601	0.79388	-1.52511	1.224	0.846
FFA_Myristic Acid [M-H]	520512	0.372562	0.583	0.79388	-2.09068	1.282	0.739
Polar Molecule_ELAIDATE [M-H]	527169	1.989117	3.167	0.79388	2.98503	4.649	0.943
FAHFA_57	531915	0.855543	1.387	0.79388	1.94752	1.506	0.835
FFA_Palmitic Acid† [M-H]	533569	-0.283758	0.457	0.79388	0.13221	0.639	0.980
VLCDCA_10	534972	0.493686	0.779	0.79388	-0.27446	0.710	0.968
FFA_Docosaenoic Acid† [M-H+Acetate]	535281	0.580152	0.937	0.79388	0.68974	0.918	0.926
VLCDCA_6	535897	0.409013	0.643	0.79388	-0.90565	0.663	0.811
VLCDCA_15	533973	0.449112	0.731	0.79391	-0.17908	0.751	0.980
Putative_Hydrocortisone 21-hemisuccinate	111837	0.503332	0.826	0.79540	-1.03352	0.765	0.815
Polar Molecule_CORTISOL [M-H]	111875	0.565694	0.930	0.79540	-1.14424	0.807	0.797
VLCDCA_45	534494	-0.480076	0.795	0.79761	-0.94656	0.932	0.926
Polar Molecule_Tetrahydrocortisol [M-H+Acetate]	123097	-0.473591	0.814	0.80082	-0.81374	0.852	0.926
Putative_Androstan-3-ol-17-one 3-glucuronide	167264	-0.406488	0.700	0.80082	-0.87101	0.739	0.891
Eicosanoid_14,15 LTE4 [M-H]	233290	-0.354758	0.610	0.80082	0.99733	0.613	0.739
Eicosanoid_15S-HpETE [M-H]	407687	0.443791	0.745	0.80082	0.69276	0.731	0.926
Putative_Levofloxacin	41558	-0.301965	0.518	0.80082	-0.15302	0.524	0.977
EIC_82	445680	-0.332308	0.559	0.80082	-0.09696	0.537	0.984
Eicosanoid_15 oxoEDE [M-H+Acetate]	474392	-0.393951	0.667	0.80082	0.07320	0.813	0.996
FFA_Stearidonic Acid [M-H]	481336	-0.492452	0.848	0.80082	0.81823	0.946	0.926
Endocannabinoid_D-erythro-Sphingosine C-18 [M-H+Acetate]	518988	-0.431733	0.733	0.80082	-0.20898	0.863	0.980
Putative_2-Hydroxypalmitic acid	523924	-0.558474	0.933	0.80082	0.38689	0.965	0.965
FAHFA_48	529646	0.447303	0.756	0.80082	0.88682	1.010	0.926
VLCDCA_17	532189	-0.558356	0.947	0.80082	-0.66546	1.017	0.943
EIC_91	326677	-0.381237	0.669	0.80686	-1.51295	0.760	0.677
Eicosanoid_13-oxoODE [M-H+Acetate]	408537	-0.427052	0.749	0.80686	0.03569	0.953	0.996
FFA_Linoleic Acid† [M-H]	532109	-0.364345	0.636	0.80686	0.02780	0.833	0.996
Polar Molecule_CORTEXOLONE [M-H+Acetate]	155822	0.448295	0.799	0.80874	-1.43941	0.870	0.726
EIC_205	221256	0.321126	0.571	0.80874	-0.53799	0.625	0.926
Eicosanoid_12S-HpEPE [M-H]	382329	0.307755	0.547	0.80874	-0.10385	0.677	0.994
VLCDCA_42	544630	0.356550	0.635	0.80874	-0.52922	0.688	0.926
Eicosanoid_18(+/-)-HETE [M-H+Acetate]	377399	-0.323871	0.581	0.81065	0.31443	0.555	0.951
Eicosanoid_15d PGJ2 [M-H]	364658	0.374474	0.674	0.81078	1.69087	0.866	0.677
Novel EIC_40	183709	-0.299322	0.542	0.81247	-0.24311	0.615	0.965
Polar Molecule_CORTISOL [M-H+Acetate]	111953	0.468603	0.862	0.81392	-1.16063	0.776	0.791
Polar Molecule_LIOTHYRONINE [M-H]	116699	0.397256	0.748	0.81392	-0.06739	0.635	0.996
Putative_7a,17a-Dimethyl-5b-androstane-3a,17b-diol glucuronide	199356	-0.946474	1.799	0.81392	-2.16800	2.122	0.926
EIC_146	251251	-0.478974	0.903	0.81392	0.25286	0.997	0.980
EIC_178	251262	-1.830622	3.398	0.81392	0.18453	3.035	0.996
Eicosanoid_15(S) HEPE [M-H+Acetate]	371287	-0.404193	0.759	0.81392	0.07761	1.289	0.996
Eicosanoid_13-oxoODE [M-H+Acetate]	402537	0.324552	0.617	0.81392	-0.26151	0.659	0.965
Bile Acid_Lithocholic Acid [M-H]	442558	0.464207	0.852	0.81392	-0.71900	0.986	0.926
Eicosanoid_Arachidonic Acid [M-H]	529143	-0.279691	0.527	0.81392	1.34467	0.717	0.678
FFA_Palmitoleic Acid† [M-H+Acetate]	529152	-0.435693	0.828	0.81392	-0.86546	0.881	0.926
FFA_Oleic Acid† [M-H+Acetate]	531868	0.372929	0.689	0.81392	1.40658	0.749	0.678
VLCDCA_8	532895	-0.288380	0.537	0.81392	-1.10247	0.536	0.677
EIC_143	315302	0.282364	0.542	0.81688	0.19775	0.564	0.971
Putative_1a-Methyl-5a-androstan-3a,17b-diol glucuronide	108971	0.306026	0.624	0.81862	-0.18051	0.824	0.980
Novel EIC_35	136210	0.255092	0.502	0.81862	-0.95864	0.634	0.782
Bile Acid_Glycoursodeoxycholic Acid [M-H]	173155	0.712648	1.446	0.81862	-0.69602	1.372	0.951
Bile Acid_Ursodeoxycholic acid [M-H]	232041	0.453272	0.905	0.81862	0.54758	1.072	0.951
EIC_158	238213	-4.219888	8.498	0.81862	1.07960	5.303	0.980
Docosanoid_7(S),17(S)-hydroxy DPA [M-H+Acetate]	275325	-0.294460	0.585	0.81862	0.69738	0.720	0.926
EIC_91	329577	0.258756	0.509	0.81862	-0.32334	0.565	0.951
Eicosanoid_13(S) HOTrE(y) [M-H+Acetate]	377311	0.375456	0.755	0.81862	0.57881	0.958	0.951
Putative_1-Palmitoyl-2-hydroxy-sn-glycero-3-phosphoethanolamine	444474	0.322265	0.640	0.81862	-0.58568	0.599	0.926
FFA_Stearidonic Acid [M-H+Acetate]	487076	0.590983	1.199	0.81862	-1.73341	1.780	0.926
Putative_Abietic acid	518727	-0.303602	0.593	0.81862	0.49431	0.594	0.926
FAHFA_37	528301	0.305885	0.618	0.81862	1.20304	0.652	0.678
FAHFA_29	529339	0.304617	0.614	0.81862	-0.59237	0.700	0.926
Endocannabinoid_Stearoyl Ethanolamide [M-H+Acetate]	530121	-0.337944	0.656	0.81862	-0.76675	0.616	0.846
Polar Molecule_OLEOYL-GLYCEROL [M-H]	531324	-0.409137	0.833	0.81862	-0.68312	0.747	0.926
FFA_Pentadecanoic Acid† [M-H+Acetate]	531478	-0.341434	0.680	0.81862	0.58298	1.066	0.951
FAHFA_69	541292	0.308960	0.620	0.81862	-0.21089	0.656	0.977
FFA_Oleic Acid† [M-H]	531847	0.344918	0.711	0.82165	1.11873	0.725	0.769
FFA_Eicosenoic Acid [M-H]	534395	-0.324269	0.670	0.82165	0.39533	0.724	0.951
FFA_Arachidic Acid† [M-H]	535084	0.397719	0.825	0.82165	-0.12247	0.933	0.994
FFA_Arachidic Acid† [M-H]	537803	0.376869	0.792	0.82601	0.20333	0.802	0.980
Eicosanoid_15-epi-PGA1 [M-H+Acetate]	260175	-0.391401	0.830	0.82627	0.18438	0.763	0.980
Polar Molecule_PALMITATE [M-H+Acetate]	529748	0.299404	0.635	0.82627	-0.59320	0.645	0.926
FFA_Heptadecanoic Acid† [M-H+Acetate]	534900	0.404559	0.862	0.82627	0.68119	0.953	0.926
VLCDCA_26	539195	-0.295756	0.630	0.82627	-1.39596	0.691	0.677
VLCDCA_44	544161	0.350809	0.761	0.83228	-0.44611	0.796	0.951
Putative_1-Stearoyl-2-hydroxy-sn-glycero-3-phosphoethanolamine	519992	0.302959	0.662	0.83411	-1.82560	1.399	0.826
EIC_158	235415	-2.644901	5.825	0.83575	-0.42958	3.817	0.996
EIC_229	199695	0.260944	0.580	0.83842	0.02191	0.503	0.996
Sterol_11-Deoxycorticosterone [M-H+Acetate]	228510	-0.232805	0.538	0.84528	0.52473	0.641	0.926
EIC_6	357386	-0.259927	0.601	0.84528	-0.45822	0.679	0.943
EIC_189	386159	0.404881	0.934	0.84528	0.34615	0.979	0.971
Bile Acid_Lithocholic Acid [M-H+Acetate]	441749	-0.351885	0.811	0.84528	-0.86061	0.799	0.926
Putative_1-Arachidoyl-2-hydroxy-sn-glycero-3-phosphocholine	525258	0.223121	0.509	0.84528	0.16001	0.791	0.980
EIC_314	153636	0.244591	0.579	0.85264	-1.71698	2.131	0.926
FFA_Tricosenoic Acid [M-H+Acetate]	536191	0.268666	0.638	0.85264	0.48645	0.591	0.926
EIC_111	454288	-0.292665	0.699	0.85323	0.74224	0.840	0.926
Eicosanoid_8-iso-15-keto-PGE2 [M-H+Acetate]	178102	-0.222795	0.545	0.85432	-0.00822	0.614	0.996
EIC_177	263648	0.335245	0.820	0.85432	0.12403	0.737	0.989
Eicosanoid_14,15-EET [M-H+Acetate]	444412	-0.282298	0.692	0.85432	-2.01738	1.268	0.739
FAHFA_12	520493	-0.244323	0.591	0.85432	0.59013	0.637	0.926
FAHFA_39	528335	-0.249120	0.606	0.85432	1.93190	0.812	0.677
Endocannabinoid_N-oleoyl Dopamine [M-H]	529004	0.298134	0.731	0.85432	0.67352	0.786	0.926
FFA_Docosadienoic Acid† [M-H]	536158	-0.360663	0.887	0.85432	0.37250	0.880	0.961
Putative_Codeine-6-b-D-glucuronide	119896	0.631045	1.566	0.85615	2.55418	1.953	0.826
EIC_209	228440	-0.193852	0.488	0.85847	-0.45022	0.453	0.926
Eicosanoid_7,17 dhDPA [M-H+Acetate]	286064	0.192581	0.485	0.85847	-0.63269	0.438	0.797
Eicosanoid_10-Nitrooleate [M-H]	510123	0.218447	0.559	0.86299	0.28068	0.552	0.951
EIC_338	297072	0.237838	0.626	0.86815	1.64229	0.680	0.677
EIC_191	412743	0.279306	0.730	0.86815	0.21374	0.599	0.971
FFA_Stearic Acid† [M-H+Acetate]	534421	0.274737	0.721	0.86815	0.74283	0.997	0.926
EIC_147	293675	0.489077	1.302	0.87078	-0.09542	1.020	0.996
Eicosanoid_17,18-DiHETE [M-H+Acetate]	268636	-0.216853	0.580	0.87095	-0.12604	0.666	0.981
Polar Molecule_CORTISOL [M-H+Acetate]	100025	0.208488	0.568	0.87129	-0.73862	0.497	0.791
Novel EIC_3	375923	-0.362556	0.987	0.87129	-0.88139	0.853	0.926
FFA_Tricosenoic Acid [M-H+Acetate]	537869	0.266429	0.722	0.87129	0.33850	0.527	0.943
Endocannabinoid_2-Arachidonyl glycerol ether [M-H+Acetate]	526318	-0.354837	0.977	0.87177	0.28583	1.088	0.980
VLCDCA_2	534195	0.244272	0.671	0.87177	-0.66013	0.667	0.926
Novel EIC_35	134247	-0.186939	0.520	0.87186	-0.57274	0.768	0.926
Novel EIC_6	229056	0.180073	0.499	0.87186	-0.73347	0.607	0.873
EIC_271	297019	-0.208466	0.582	0.87186	0.27953	0.734	0.968
EIC_177	262111	0.189721	0.537	0.87461	-0.08091	0.580	0.994
EIC_354	155807	0.273171	0.785	0.87794	-0.77730	0.977	0.926
Eicosanoid_15d PGJ2 [M-H]	364207	-0.166133	0.495	0.88773	0.26120	0.591	0.961
FFA_Eicosatrienoic Acid† [M-H+Acetate]	534431	-0.189769	0.584	0.89606	1.12694	0.779	0.797
EIC_251	297013	0.308520	0.967	0.89837	0.45122	1.021	0.961
FAHFA_4	509868	-0.506677	1.581	0.89837	-0.62301	1.555	0.965
VLCDCA_34	537603	-0.185305	0.585	0.89882	-0.64756	0.625	0.926
VLCDCA_28	544581	0.202777	0.650	0.90172	-0.56824	0.586	0.926
Putative_6-((E)-2-((1R,2S,3R,5S)-3,5-Dihydroxy-2-((Z)-oct-2-enyl)cyclopentyl)vinyl)tetrahydro-2H-pyran-2-one	174904	-0.219407	0.719	0.90490	0.52176	0.631	0.926
EIC_356	208342	-0.207010	0.689	0.90735	-0.54134	0.714	0.926
Docosanoid_7(S),17(S)-hydroxy DPA [M-H+Acetate]	270778	-0.220646	0.743	0.90735	-1.18248	0.840	0.797
FAHFA_43	529622	-0.190521	0.644	0.90735	0.10293	0.942	0.996
FAHFA_69	542169	0.198372	0.670	0.90735	-0.45507	0.701	0.943
Eicosanoid_PGF1a [M-H]	167096	-0.188580	0.675	0.90897	0.50626	0.479	0.926
Docosanoid_10,11-DiHDPA [M-H+Acetate]	346852	-0.214739	0.746	0.90897	-1.32978	0.659	0.677
EIC_166	353621	0.270482	0.964	0.90897	0.22198	0.753	0.977
EIC_192	402518	0.195976	0.670	0.90897	0.36936	0.613	0.951
FAHFA_11	520688	0.189624	0.674	0.90897	-0.02470	0.802	0.996
Polar Molecule_PALMITOLEATE [M-H]	521338	0.214426	0.763	0.90897	1.25193	0.860	0.797
Eicosanoid_DHA [M-H+Acetate]	529467	0.173774	0.607	0.90897	0.91545	0.644	0.797
VLCDCA_11	534221	-0.196178	0.700	0.90897	-0.62164	0.686	0.926
VLCDCA_7	542382	0.226804	0.805	0.90897	0.65157	0.809	0.926
Polar Molecule_Tetrahydrocortisol [M-H+Acetate]	138195	0.174172	0.638	0.91317	-0.07570	0.679	0.996
EIC_58	348012	-1.008373	3.721	0.91341	-0.89235	1.628	0.951
VLCDCA_11	537154	-0.146334	0.552	0.91628	0.03704	0.483	0.996
FFA_Docosadienoic Acid† [M-H]	539086	-0.403536	1.526	0.91628	-1.63660	1.574	0.926
EIC_351	175055	0.157600	0.613	0.91841	-0.33027	0.543	0.951
Eicosanoid_15-epi-PGA1 [M-H+Acetate]	248240	-0.174765	0.691	0.91841	0.35155	0.820	0.961
Eicosanoid_5,6-EET [M-H]	473277	-0.157199	0.605	0.91841	0.31535	0.700	0.961
Eicosanoid_Arachidonic Acid [M-H]	527450	-0.184687	0.724	0.91841	1.37297	0.627	0.677
FFA_Heptadecanoic Acid† [M-H]	532380	-0.154668	0.617	0.91841	0.19202	0.786	0.980
FFA_Docosadienoic Acid† [M-H]	534554	0.186275	0.742	0.91841	1.00524	0.869	0.906
VLCDCA_40	540421	0.219215	0.860	0.91841	-1.74668	1.118	0.754
Putative_4-Androsten-17b-ol-3-one glucosiduronate	153131	-0.245828	1.011	0.92062	0.25879	0.821	0.977
FAHFA_27	531614	0.241270	0.987	0.92062	0.48572	1.088	0.961
EIC_72	439727	0.178754	0.746	0.92079	-0.78127	0.832	0.926
VLCDCA_8	534206	-0.161882	0.680	0.92080	-1.23935	0.679	0.678
Eicosanoid_19(R)-HETE [M-H]	367701	0.117798	0.499	0.92104	0.17318	0.574	0.977
Eicosanoid_14(15) EpETE [M-H]	408497	-0.116836	0.501	0.92185	0.38456	0.510	0.926
Eicosanoid_14,15-diHETrE [M-H+Acetate]	323938	0.379352	1.648	0.92318	-0.00556	1.438	0.998
FAHFA_58	531777	0.295663	1.310	0.92580	1.28538	1.598	0.926
Docosanoid_7(S),17(S)-hydroxy DPA [M-H+Acetate]	283207	-0.184619	0.835	0.92686	-0.48399	0.838	0.951
FFA_Stearic Acid† [M-H]	533317	0.168282	0.775	0.92899	0.67370	0.777	0.926
Polar Molecule_STEARATE [M-H]	530351	0.143980	0.678	0.93163	-0.11468	0.640	0.984
Eicosanoid_13,14-dihydro-PGF1a [M-H]	195192	-0.157105	0.797	0.93441	0.74058	0.868	0.926
Novel EIC_6	234484	0.104521	0.509	0.93441	0.29072	0.510	0.951
Bile Acid_Ursodeoxycholic acid [M-H]	245404	-0.233812	1.155	0.93441	-1.96059	1.394	0.797
EIC_104	401285	0.184635	0.936	0.93441	0.05839	0.646	0.996
EIC_111	443405	-0.139816	0.722	0.93441	0.61208	0.695	0.926
FAHFA_13	525986	0.141433	0.712	0.93441	-0.13906	1.054	0.994
FAHFA_28	527378	-0.133554	0.694	0.93441	1.26103	0.729	0.713
FFA_Heptadecaenoic Acid† [M-H+Acetate]	532672	-0.132788	0.688	0.93441	0.23394	1.054	0.980
FFA_Docosaenoic Acid† [M-H]	535834	0.230293	1.151	0.93441	-1.50296	1.112	0.815
Polar Molecule_NERVONATE [M-H]	537448	-0.169813	0.858	0.93441	1.21076	0.853	0.797
Polar Molecule_VITAMIN D2 [M-H]	531344	0.143091	0.781	0.93963	0.71734	0.862	0.926
FFA_a-linolenic Acid† [M-H]	520524	0.110945	0.616	0.94085	0.26841	0.622	0.961
EIC_348	329017	-0.096220	0.565	0.94642	-1.08441	0.628	0.713
EIC_189	381176	-0.106145	0.632	0.94704	0.25930	0.681	0.968
Putative_a-Hyodeoxycholic acid methyl ester	343493	0.121446	0.734	0.94746	-0.69294	0.699	0.926
Docosanoid_7,8-DiHDPA [M-H+Acetate]	364346	-0.129168	0.808	0.94746	-0.31901	0.721	0.961
Eicosanoid_9-oxoOTrE [M-H+Acetate]	368320	-0.116490	0.724	0.94746	-1.33409	1.011	0.826
FFA_Linoleic Acid† [M-H]	528366	-0.085612	0.538	0.94746	0.72078	0.572	0.844
Novel EIC_18	420737	-0.084695	0.586	0.95835	0.34123	0.543	0.947
VLCDCA_2	533159	-0.102926	0.738	0.96133	0.46152	0.759	0.951
Novel EIC_3	381111	-0.083213	0.615	0.96225	-0.25567	0.618	0.965
Eicosanoid_5S-HpEPE [M-H+Acetate]	402588	-0.083240	0.641	0.96225	-0.95169	0.694	0.811
FFA_Myristic Acid [M-H+Acetate]	524395	0.103706	0.791	0.96225	0.45208	1.027	0.961
Putative_1-Palmitoyl-2-hydroxy-sn-glycero-3-phosphoethanolamine	452730	-0.133711	1.052	0.96317	-0.84425	1.061	0.926
Putative_Codeine-6-b-D-glucuronide	111091	0.185958	1.586	0.96777	2.08871	1.809	0.906
Docosanoid_MCTR2 [M-H]	208505	0.088414	0.749	0.96777	1.01827	0.773	0.826
EIC_87	390659	-0.085997	0.738	0.96777	-0.21585	0.638	0.972
Eicosanoid_13,14-dihydro-15-keto-tetranor-PGD2 [M-H+Acetate]	125018	0.072658	0.644	0.96915	0.17867	0.634	0.980
FFA_Palmitic Acid† [M-H+Acetate]	531996	0.068452	0.614	0.96915	0.49639	0.853	0.951
FAHFA_27	528052	-0.061658	0.579	0.97199	0.47240	0.761	0.951
EIC_158	232601	0.072637	0.715	0.97326	-0.35813	0.882	0.965
Novel EIC_33	460414	-0.099628	0.970	0.97326	0.79990	0.817	0.926
Eicosanoid_11b PGE2 [M-H]	104963	0.062742	0.646	0.97479	0.26454	0.520	0.951
EIC_138	201561	0.061097	0.801	0.97479	-0.35894	0.733	0.959
EIC_358	264609	0.048307	0.586	0.97479	-0.31425	0.614	0.951
Eicosanoid_12-HHTrE [M-H+Acetate]	332750	-0.197886	2.432	0.97479	-0.25512	3.024	0.996
Putative_D-erythro-Sphingosine-1-phosphate	377404	-0.063514	0.687	0.97479	0.29030	0.567	0.951
EIC_15	409677	0.068213	0.734	0.97479	-1.74964	1.010	0.713
EIC_24	422518	0.072345	0.828	0.97479	-1.01439	0.837	0.873
EIC_183	455310	-0.052303	0.594	0.97479	0.43545	0.608	0.926
Eicosanoid_DHA [M-H]	529758	0.044563	0.561	0.97479	1.73588	0.827	0.677
FFA_Stearic Acid† [M-H+Acetate]	533106	0.056732	0.664	0.97479	-0.09316	0.748	0.995
FFA_Oleic Acid† [M-H]	534665	0.054522	0.698	0.97479	0.95961	0.976	0.926
VLCDCA_32	537601	-0.054427	0.718	0.97479	-0.60678	0.711	0.926
Putative_2a-Methyl-5a-androstan-3a-ol-17-one glucuronide	92507	-0.078961	0.883	0.97479	-0.28995	0.707	0.965
FFA_a-linolenic Acid† [M-H+Acetate]	520570	0.049954	0.684	0.97570	0.13433	0.660	0.980
FFA_Oleic Acid† [M-H]	530347	0.046286	0.710	0.98076	1.29865	0.709	0.678
EIC_182	323049	0.063848	1.105	0.98310	0.24968	0.847	0.977
Eicosanoid_20cooh AA [M-H]	356342	0.036366	0.636	0.98310	-0.33600	0.550	0.951
Polar Molecule_CORTISONE [M-H+Acetate]	118213	-0.029151	0.663	0.98584	-0.31748	0.708	0.961
Eicosanoid_PGF1a [M-H]	174973	-0.028323	0.677	0.98584	1.03734	0.624	0.726
Novel EIC_6	233564	-0.031295	0.654	0.98584	1.42848	0.705	0.677
Bile Acid_Ursodeoxycholic acid [M-H+Acetate]	244872	0.037495	0.888	0.98584	-1.19597	0.875	0.811
Putative_Dodecylbenzenesulfonic acid	403895	0.041680	0.893	0.98584	-0.66233	0.857	0.926
VLCDCA_6	534200	-0.033097	0.716	0.98584	-0.30656	0.714	0.961
FFA_Heptadecanoic Acid† [M-H]	534537	0.026903	0.637	0.98584	0.01338	0.794	0.996
Eicosanoid_Arachidonic Acid [M-H]	531480	-0.023483	0.674	0.98730	0.59154	0.644	0.926
VLCDCA_8	537536	0.036918	1.034	0.98730	-0.58192	0.892	0.943
VLCDCA_14	537555	-0.028818	0.817	0.98730	-0.60625	0.759	0.926
Putative_4-Androsten-17b-ol-3-one glucosiduronate	158439	0.026195	0.912	0.98808	0.83362	0.695	0.873
Polar Molecule_PALMITATE [M-H+Acetate]	527462	0.037790	1.179	0.98808	0.94987	1.198	0.926
VLCDCA_44	547731	0.019166	0.656	0.98808	-0.08153	0.715	0.996
Eicosanoid_19(R)-HETE [M-H]	362815	0.014436	0.725	0.99281	-0.04146	0.736	0.996
EIC_185	397318	-0.020457	1.055	0.99281	-0.90357	0.731	0.855
EIC_7	401671	-0.016979	0.986	0.99317	2.18426	0.872	0.677
EIC_250	191117	0.004934	0.557	0.99849	0.57413	0.588	0.926
EIC_83	335777	0.001716	0.838	0.99933	-1.40587	1.237	0.915
EIC_4	345300	-0.001023	0.457	0.99933	-0.28821	0.710	0.965
FAHFA_12	523559	-0.002675	0.881	0.99933	1.00965	0.920	0.926
FFA_Myristic Acid [M-H]	524668	0.000581	0.689	0.99933	0.23752	0.845	0.980

## Sheet: Supplementary Table 3.
Supplementary Table 3. The effect of intensive fat mass loss and fat mass regain on LC-MS-Metabolome in the diet group of physique study participants
Annotation and adduct information		PRE-MID			PRE-POST
Metabolite ID	Matching ID	Estimate	Standard error	FDR	Estimate	Standard error	FDR
EIC_205	212224	2.74985	0.412	1.85e-08	0.549682	0.315	0.504
EIC_10	432853	-2.09798	0.322	2.55e-08	-0.215295	0.339	0.868
Polar Molecule_CORTISONE [M-H+Acetate]	106542	2.61123	0.415	7.26e-08	0.720751	0.388	0.453
EIC_205	215007	1.84087	0.297	8.71e-08	0.745486	0.320	0.393
FFA_Dihomo-g-linolenic† [M-H]	530664	-1.70937	0.275	8.71e-08	0.425212	0.384	0.679
EIC_229	193228	2.15898	0.381	1.78e-06	0.567955	0.373	0.565
FFA_Behenic Acid† [M-H]	540593	2.30734	0.409	1.79e-06	0.056638	0.273	0.969
FFA_Palmitoleic Acid† [M-H]	531843	-2.12247	0.385	3.23e-06	-0.178814	0.434	0.910
FFA_Palmitoleic Acid† [M-H]	529701	-2.21043	0.410	5.66e-06	-0.306277	0.362	0.796
Putative_2-Hydroxypalmitic acid	525710	-1.65568	0.311	7.12e-06	0.245083	0.454	0.888
Putative_1-Oleoyl-sn-glycero-3-phosphoethanolamine	463104	4.23833	0.804	8.95e-06	-0.366547	0.403	0.793
Polar Molecule_TRICOSANOATE [M-H]	539374	4.65123	0.885	8.98e-06	-0.142911	0.445	0.936
EIC_250	199108	-1.79399	0.347	1.08e-05	-0.763229	0.343	0.393
Eicosanoid_13S-HpOTrE(gamma) [M-H]	387101	4.45176	0.858	1.08e-05	-0.362192	0.419	0.793
Polar Molecule_TRICOSANOATE [M-H]	540604	2.48741	0.478	1.08e-05	0.119488	0.338	0.922
Bile Acid_Glycochenodeoxycholic Acid [M-H]	255997	6.82556	1.325	1.15e-05	0.056600	0.409	0.984
Polar Molecule_CORTISONE [M-H+Acetate]	100714	2.36001	0.473	2.60e-05	0.525766	0.374	0.598
FFA_Tricosenoic Acid [M-H]	539371	4.14092	0.834	2.75e-05	-0.462350	0.261	0.504
Bile Acid_Glycochenodeoxycholic Acid [M-H]	251495	8.92781	1.818	3.43e-05	-0.009670	0.302	0.993
EIC_111	454288	-1.80073	0.368	3.49e-05	-0.028623	0.466	0.986
Putative_2-Hydroxypalmitic acid	521349	-1.61839	0.332	3.64e-05	0.626203	0.438	0.586
Eicosanoid_Arachidonic Acid [M-H]	529143	-1.42300	0.294	4.21e-05	0.245083	0.494	0.900
FFA_Tricosanoic Acid† [M-H]	542623	2.26637	0.477	6.24e-05	-0.170754	0.340	0.900
FFA_Pentadecanoic Acid† [M-H+Acetate]	531478	-2.07264	0.445	9.24e-05	-0.267099	0.718	0.922
FFA_Tricosanoic Acid† [M-H+Acetate]	542670	2.19214	0.471	9.24e-05	-0.234756	0.306	0.840
FFA_Eicosadienoic Acid† [M-H]	531992	-1.50251	0.324	9.39e-05	0.228416	0.373	0.869
FFA_Lignoceric Acid† [M-H]	544841	3.32811	0.717	9.39e-05	-0.100555	0.282	0.922
Eicosanoid_13-HODE [M-H+Acetate]	397750	3.95795	0.855	9.52e-05	0.402244	0.389	0.721
Bile Acid_b-Muricholic Acid [M-H]	235527	15.27412	3.320	0.000101	0.032069	0.354	0.986
FFA_Dihomo-g-linolenic† [M-H]	529407	-1.60569	0.350	1.02e-04	0.203703	0.398	0.895
Bile Acid_b-Muricholic Acid [M-H+Acetate]	235588	15.00227	3.280	1.04e-04	0.033930	0.347	0.986
Docosanoid_osbond acid, all-cis-4,7,10,13,16-DPA [M-H]	528114	-1.34197	0.293	1.04e-04	0.889079	0.482	0.460
FFA_Heptadecaenoic Acid† [M-H+Acetate]	529424	-1.85884	0.410	1.20e-04	-0.485161	0.568	0.796
EIC_150	301803	1.43078	0.319	1.43e-04	0.848039	0.467	0.474
Novel EIC_9	424299	5.25573	1.171	1.43e-04	-0.715093	0.362	0.409
FFA_Adrenic Acid† [M-H]	528116	-1.44563	0.326	1.82e-04	1.101204	0.515	0.393
FAHFA_76	545467	-2.40763	0.548	2.13e-04	-1.293497	0.528	0.393
Endocannabinoid_N-arachidonoyl Dopamine [M-H]	515028	-1.46720	0.336	2.26e-04	-0.049500	0.468	0.986
Eicosanoid_5,6-EET [M-H]	469222	-1.77365	0.406	2.28e-04	-0.050232	0.389	0.986
EIC_9	408763	-1.85940	0.427	2.39e-04	-0.564894	0.458	0.634
Putative_PGPC	447166	9.73590	2.246	2.51e-04	0.246557	0.676	0.922
EIC_322	266179	1.63348	0.379	2.62e-04	0.070351	0.370	0.969
Eicosanoid_12S-HpEPE [M-H]	392272	2.84294	0.661	2.69e-04	0.376797	0.340	0.679
Eicosanoid_Adrenic Acid [M-H]	532126	-1.83243	0.426	2.69e-04	-0.262888	0.497	0.890
Bile Acid_Taurocholic Acid [M-H]	121166	7.04311	1.644	2.80e-04	-0.053088	0.567	0.986
EIC_62	269687	3.21259	0.752	2.90e-04	0.622785	0.407	0.565
EIC_260	267578	1.90841	0.452	3.59e-04	-0.048863	0.303	0.978
EIC_121	298758	3.39235	0.808	3.80e-04	0.003313	0.385	0.997
Eicosanoid_5(S) HETrE [M-H]	501853	-1.44095	0.344	3.80e-04	0.390475	0.325	0.645
FFA_Docosaenoic Acid† [M-H]	535834	3.17311	0.756	3.80e-04	0.207088	0.502	0.910
EIC_138	199063	1.58717	0.379	3.88e-04	0.412116	0.353	0.651
EIC_121	285160	3.55272	0.864	5.16e-04	0.021195	0.387	0.986
Eicosanoid_Adrenic Acid [M-H]	530967	-1.58451	0.388	5.70e-04	0.395938	0.460	0.793
FFA_Docosatrienoic Acid† [M-H]	532415	-1.50049	0.368	5.70e-04	0.353232	0.463	0.840
FAHFA_39	528335	-1.23484	0.304	5.98e-04	1.185919	0.584	0.409
Eicosanoid_PGF1a [M-H]	164760	1.32758	0.328	6.18e-04	0.116571	0.318	0.922
FFA_Palmitoleic Acid† [M-H]	526135	-1.36853	0.338	6.18e-04	0.247897	0.324	0.840
FFA_Behenic Acid† [M-H]	542037	3.20386	0.793	6.18e-04	-0.284733	0.386	0.840
FFA_Tricosanoic Acid† [M-H]	544047	2.15192	0.533	6.18e-04	-0.104322	0.344	0.938
FFA_Heptadecaenoic Acid† [M-H]	529369	-1.82783	0.454	6.39e-04	-0.123927	0.546	0.961
EIC_263	204232	1.35052	0.337	6.67e-04	0.390033	0.256	0.565
FFA_Heptadecanoic Acid† [M-H+Acetate]	534900	-1.98634	0.495	6.67e-04	-1.362476	0.631	0.393
Eicosanoid_15d PGJ2 [M-H]	364207	1.20826	0.303	7.04e-04	0.937387	0.455	0.409
Eicosanoid_5,6-EET [M-H]	473277	-1.74137	0.437	7.04e-04	-0.952660	0.446	0.393
Polar Molecule_OLEOYL-GLYCEROL [M-H]	522767	4.40653	1.104	7.04e-04	0.516873	0.725	0.848
Endocannabinoid_Arachidonoyl Ethanolamide [M-H+Acetate]	479677	-1.36990	0.345	7.56e-04	0.197708	0.423	0.903
EIC_137	217947	2.88898	0.734	8.52e-04	0.260293	0.476	0.888
Novel EIC_5	373373	1.83590	0.467	8.52e-04	0.609012	0.377	0.550
Putative_N-Oleoyl-L-serine	522459	2.99310	0.764	8.72e-04	-0.591603	0.364	0.550
Polar Molecule_OLEOYL-GLYCEROL [M-H]	523301	5.02450	1.281	0.000872	-0.249495	0.535	0.903
FFA_Palmitic Acid† [M-H+Acetate]	531306	-1.62562	0.415	8.72e-04	-0.364721	0.477	0.840
EIC_63	392256	4.46353	1.143	8.93e-04	0.538573	0.389	0.609
Polar Molecule_HEPTADECANOATE [M-H]	529375	-1.66812	0.427	8.93e-04	-0.097100	0.555	0.978
FFA_Heptadecanoic Acid† [M-H+Acetate]	534128	-1.64108	0.421	8.93e-04	0.109088	0.545	0.969
FAHFA_43	529622	-1.42525	0.366	9.08e-04	0.399363	0.518	0.840
Polar Molecule_GAMMA-LINOLENATE [M-H]	516521	-1.41269	0.364	0.000941	0.657899	0.533	0.634
Eicosanoid_tetranor 12(R) HETE [M-H]	322224	1.69987	0.440	1.01e-03	0.681406	0.354	0.413
EIC_64	296371	6.05495	1.571	1.02e-03	0.474838	0.429	0.679
Novel EIC_6	229056	1.46162	0.380	1.03e-03	0.593667	0.278	0.393
EIC_87	387542	1.53432	0.401	1.08e-03	1.070654	0.442	0.393
Putative_N-oleoyl taurine	497820	-1.45941	0.381	1.08e-03	-0.629694	0.358	0.504
Eicosanoid_EPA [M-H+Acetate]	523035	1.33612	0.349	1.08e-03	0.131470	0.375	0.924
Polar Molecule_GLYCOCHOLATE [M-H]	170444	4.18331	1.095	1.10e-03	-0.495524	0.380	0.633
EIC_137	228394	1.36166	0.358	1.13e-03	0.244640	0.354	0.848
VLCDCA_1	531896	-1.54763	0.406	1.13e-03	-0.247398	0.558	0.903
FFA_Docosadienoic Acid† [M-H]	534554	-1.29425	0.341	1.18e-03	0.322598	0.389	0.806
Bile Acid_Chenodeoxycholic acid [M-H]	335887	13.61993	3.598	1.21e-03	0.373768	0.596	0.868
EIC_267	224977	-1.51895	0.402	1.24e-03	0.140284	0.705	0.969
EIC_306	316868	2.24815	0.596	1.24e-03	0.475253	0.396	0.645
FFA_Palmitoleic Acid† [M-H+Acetate]	526018	-1.35163	0.359	1.27e-03	0.315114	0.364	0.793
Eicosanoid_13,14-dihydro-PGE1 [M-H]	185541	1.93286	0.514	1.27e-03	0.190829	0.343	0.888
Novel EIC_9	422540	4.08013	1.090	1.34e-03	-0.282468	0.332	0.796
Novel EIC_28	457606	12.44070	3.322	1.34e-03	-0.299275	0.472	0.868
Novel EIC_6	234484	1.22773	0.329	1.38e-03	0.309031	0.348	0.793
Putative_Androsterone glucuronide	170446	4.41729	1.184	1.38e-03	-0.470932	0.416	0.677
FFA_Nervonic Acid† [M-H]	539105	3.14682	0.846	1.43e-03	-0.017403	0.381	0.986
EIC_176	379289	2.52678	0.680	1.43e-03	0.442547	0.360	0.634
FAHFA_21	526086	-1.42192	0.383	1.46e-03	0.165025	0.362	0.903
EIC_156	264493	1.64832	0.445	1.47e-03	0.931512	0.382	0.393
Bile Acid_Chenodeoxycholic acid [M-H+Acetate]	335959	12.97004	3.502	1.47e-03	0.348553	0.571	0.869
Putative_N-Oleoyl-L-serine	524040	3.00910	0.816	1.53e-03	-0.661812	0.307	0.393
VLCDCA_26	535393	-1.31818	0.357	1.53e-03	-0.818607	0.406	0.409
Putative_PGPC	448001	7.31038	1.986	1.56e-03	-0.700587	0.700	0.742
Endocannabinoid_N-oleoyl Dopamine [M-H]	529004	-1.67813	0.457	1.57e-03	-0.409818	0.542	0.840
Bile Acid_Deoxycholic Acid [M-H+Acetate]	353332	7.24589	1.975	1.58e-03	-0.386009	0.515	0.840
FAHFA_22	526407	-1.24279	0.339	1.58e-03	0.223846	0.429	0.890
Eicosanoid_15 oxoEDE [M-H+Acetate]	474392	-1.55990	0.427	1.64e-03	-0.080646	0.497	0.978
FFA_Linoleic Acid† [M-H]	526174	-1.38954	0.380	1.64e-03	0.043762	0.454	0.986
Eicosanoid_Arachidonic Acid [M-H+Acetate]	531873	-1.30279	0.357	1.64e-03	0.202482	0.378	0.888
FFA_Lignoceric Acid† [M-H+Acetate]	546323	3.99010	1.093	1.64e-03	0.213327	0.392	0.888
FAHFA_58	531777	-1.54148	0.424	1.73e-03	0.473303	0.655	0.845
Bile Acid_Deoxycholic Acid [M-H]	353270	6.72517	1.852	1.73e-03	-0.357720	0.497	0.845
EIC_91	326677	1.25045	0.345	1.74e-03	0.358360	0.421	0.796
FFA_Eicosenoic Acid [M-H]	534395	-1.36414	0.378	1.87e-03	-0.162733	0.376	0.903
Bile Acid_Glycochenodeoxycholic Acid [M-H]	247605	2.71839	0.754	1.88e-03	-0.087259	0.256	0.926
Putative_2-Hydroxypalmitic acid	523924	-2.31940	0.644	1.90e-03	-1.062162	0.658	0.550
Eicosanoid_8-iso-PGA2 [M-H+Acetate]	222096	1.89907	0.529	1.94e-03	0.240522	0.430	0.888
FAHFA_47	529594	-1.88230	0.525	1.96e-03	0.750384	1.029	0.844
EIC_125	185482	8.40527	2.348	2.00e-03	0.166826	0.341	0.901
EIC_69	416464	5.00159	1.405	2.13e-03	0.574952	0.800	0.845
EIC_58	342155	4.33317	1.219	2.15e-03	1.230076	1.014	0.644
Eicosanoid_EPA [M-H]	523009	1.26032	0.356	2.28e-03	0.019585	0.384	0.986
Polar Molecule_CORTISONE [M-H]	112369	-1.16449	0.330	2.29e-03	-0.047947	0.315	0.979
EIC_62	263579	4.36045	1.236	2.29e-03	-0.089380	0.295	0.938
FFA_Eicosatrienoic Acid† [M-H+Acetate]	534431	-1.53987	0.436	2.29e-03	0.300909	0.563	0.888
Polar Molecule_allo-Tetrahydrocortisol [M-H+Acetate]	97322	-1.36623	0.387	2.29e-03	-0.366691	0.406	0.793
FFA_Eicosenoic Acid [M-H]	531994	-1.35349	0.384	2.30e-03	0.348049	0.551	0.868
Eicosanoid_PGF1a [M-H]	167096	1.30188	0.371	2.44e-03	0.549926	0.345	0.550
Bile Acid_Glycochenodeoxycholic Acid [M-H]	237311	2.67368	0.763	2.44e-03	-0.521624	0.387	0.611
FFA_Oleic Acid† [M-H]	535786	-1.37079	0.391	2.44e-03	0.091631	0.469	0.969
FAHFA_48	529646	-1.40484	0.401	2.44e-03	-0.023739	0.517	0.986
FFA_Myristic Acid [M-H+Acetate]	522387	-1.73722	0.497	2.45e-03	-0.051442	0.579	0.986
Eicosanoid_13S-HpOTrE [M-H]	370062	3.90851	1.120	2.49e-03	-0.588801	0.414	0.591
EIC_83	344675	1.23325	0.354	2.50e-03	0.715442	0.338	0.393
Polar Molecule_THYMIDINE-MONOPHOSPHATE [M-H+Acetate]	35550	-1.38917	0.399	2.50e-03	-0.960483	0.411	0.393
FFA_a-linolenic Acid† [M-H]	523928	-1.14584	0.329	2.50e-03	0.493697	0.526	0.776
EIC_95	408174	-1.40782	0.405	2.52e-03	-0.047841	0.449	0.986
VLCDCA_34	544601	-1.00360	0.289	2.52e-03	-0.513387	0.320	0.550
EIC_52	240462	3.47698	1.001	2.54e-03	0.094054	0.398	0.956
EIC_233	167632	3.55487	1.024	2.56e-03	0.798911	0.421	0.432
EIC_205	208847	1.77992	0.518	2.84e-03	0.468175	0.402	0.653
EIC_69	419015	4.95611	1.442	2.84e-03	-0.224800	0.808	0.946
FFA_Behenic Acid† [M-H+Acetate]	542079	3.02243	0.879	2.84e-03	-0.601515	0.411	0.574
Eicosanoid_15-epi-PGA1 [M-H+Acetate]	253524	1.33337	0.391	3.12e-03	0.477363	0.407	0.649
FFA_Lignoceric Acid† [M-H]	546284	4.42009	1.299	3.17e-03	0.206575	0.435	0.902
EIC_358	269922	1.22949	0.365	3.55e-03	0.386157	0.280	0.610
Novel EIC_35	134247	-1.12004	0.333	3.64e-03	0.051988	0.387	0.985
Eicosanoid_5S-HpEPE [M-H]	400564	2.64142	0.788	3.74e-03	0.141888	0.466	0.938
Eicosanoid_15-epi-PGA1 [M-H+Acetate]	260175	-1.74508	0.522	3.79e-03	-1.213803	0.481	0.393
EIC_1	310243	-1.99527	0.597	3.79e-03	-0.663166	0.642	0.721
EIC_17	404135	2.32429	0.697	3.88e-03	0.303840	0.372	0.813
Novel EIC_3	381111	-1.30471	0.392	3.89e-03	-0.685091	0.376	0.474
EIC_303	333176	1.70113	0.512	4.01e-03	0.613702	0.384	0.550
EIC_29	356636	1.91635	0.580	4.21e-03	0.536477	0.342	0.550
Polar Molecule_CORTISONE [M-H+Acetate]	112455	-1.21460	0.369	4.37e-03	-0.152490	0.352	0.903
EIC_41	183510	1.92767	0.586	4.37e-03	0.624334	0.374	0.532
EIC_209	228440	1.31971	0.402	4.37e-03	0.423101	0.324	0.633
Eicosanoid_11,12-diHETrE [M-H+Acetate]	350152	4.49899	1.370	4.37e-03	0.085873	0.516	0.978
Novel EIC_8	433376	3.93997	1.198	4.37e-03	-0.095531	0.434	0.962
FAHFA_57	531915	-1.22642	0.374	4.37e-03	0.442109	0.505	0.793
FFA_Palmitic Acid† [M-H+Acetate]	531996	-1.38475	0.421	4.37e-03	-0.035656	0.531	0.986
FFA_Myristic Acid [M-H]	522346	-1.64198	0.501	4.48e-03	-0.203413	0.561	0.922
FFA_a-linolenic Acid† [M-H]	521670	-1.71317	0.524	4.51e-03	-0.419008	0.594	0.848
FFA_Heptadecanoic Acid† [M-H]	532380	-1.29093	0.395	4.51e-03	-0.019735	0.416	0.986
EIC_251	291460	1.40296	0.430	4.51e-03	0.469991	0.366	0.633
EIC_51	336280	2.01987	0.619	4.51e-03	-0.556190	0.408	0.610
FFA_Eicosenoic Acid [M-H]	539066	-1.46192	0.448	4.51e-03	-0.120393	0.444	0.946
EIC_125	198399	3.80020	1.170	4.76e-03	1.407318	1.410	0.742
VLCDCA_17	532189	-1.57958	0.489	4.95e-03	-0.781728	0.494	0.550
FFA_Stearic Acid† [M-H+Acetate]	534421	-1.13880	0.352	4.95e-03	0.457302	0.595	0.840
FFA_Myristic Acid [M-H]	524668	-1.54724	0.479	4.97e-03	-0.328610	0.631	0.890
FFA_Docosadienoic Acid† [M-H]	536158	-1.52357	0.473	5.13e-03	-0.948686	0.512	0.453
FFA_Pentadecanoic Acid† [M-H]	530326	-1.45182	0.452	5.19e-03	-0.331699	0.474	0.848
EIC_345	397350	2.96156	0.922	5.22e-03	-0.000157	0.446	1.000
Polar Molecule_CORTISOL [M-H]	107951	1.75970	0.549	5.27e-03	0.380336	0.426	0.793
FAHFA_62	533738	-2.20112	0.687	5.32e-03	-1.557500	0.803	0.409
EIC_63	399217	3.12183	0.976	5.38e-03	0.089530	0.536	0.978
Eicosanoid_DHA [M-H]	525743	-1.03060	0.323	5.40e-03	0.322237	0.373	0.793
FFA_Oleic Acid† [M-H]	534665	-1.39540	0.438	5.48e-03	0.403619	0.595	0.853
EIC_271	281689	3.18330	0.999	5.50e-03	-0.331782	0.375	0.793
Putative_Monolinolenin (9c,12c,15c)	343482	1.32212	0.417	5.84e-03	0.829696	0.469	0.504
EIC_146	239745	1.17710	0.372	5.86e-03	0.040221	0.290	0.984
Eicosanoid_13,14-dihydro-15-keto-PGA2 [M-H+Acetate]	253519	5.70801	1.806	5.89e-03	-0.431855	0.335	0.633
Docosanoid_7(S),17(S)-hydroxy DPA [M-H+Acetate]	270778	1.50348	0.476	5.89e-03	0.672526	0.391	0.507
FFA_Nervonic Acid† [M-H]	544451	2.01195	0.637	5.89e-03	-0.708565	0.434	0.550
Putative_1-Pentadecanoyl-sn-glycero-3-phosphocholine	394443	1.48226	0.471	6.06e-03	-0.205285	0.344	0.877
Eicosanoid_13,14-dihydro-15-keto-tetranor-PGF1alpha [M-H+Acetate]	129125	-1.04911	0.333	6.08e-03	0.041643	0.431	0.986
Endocannabinoid_D-erythro-Sphingosine C-18 [M-H+Acetate]	518988	-1.83483	0.584	6.13e-03	-1.047023	0.658	0.550
EIC_45	226969	1.19124	0.380	6.18e-03	0.576275	0.390	0.574
EIC_79	252002	1.16231	0.371	6.18e-03	1.079783	0.463	0.393
EIC_73	294423	3.85711	1.230	6.18e-03	0.196216	0.360	0.888
EIC_229	199695	1.34240	0.430	6.36e-03	0.689181	0.335	0.409
EIC_156	253384	1.37168	0.439	6.36e-03	1.098219	0.895	0.634
FFA_Heptadecaenoic Acid† [M-H]	531845	-1.16318	0.372	6.36e-03	-0.099955	0.445	0.961
FFA_Myristic Acid [M-H+Acetate]	524395	-1.63558	0.525	6.50e-03	-0.340352	0.751	0.903
FFA_Heptadecaenoic Acid† [M-H+Acetate]	532672	-1.54000	0.495	6.57e-03	-0.343521	0.655	0.890
Eicosanoid_11,12-diHETrE [M-H]	355943	1.82752	0.590	6.89e-03	0.277597	0.436	0.868
FFA_Behenic Acid† [M-H]	539090	1.50955	0.490	7.22e-03	0.849448	0.798	0.702
Putative_Dodecylbenzenesulfonic acid	399899	2.15591	0.701	7.23e-03	0.557075	0.461	0.644
EIC_62	253339	7.25634	2.362	7.25e-03	-0.439621	0.394	0.679
EIC_69	413523	3.22873	1.051	7.25e-03	0.432754	0.501	0.793
Endocannabinoid_2-Arachidonyl glycerol ether [M-H+Acetate]	526318	-1.49958	0.488	7.25e-03	0.168268	0.599	0.946
EIC_158	226291	1.55884	0.508	7.30e-03	0.155886	0.352	0.903
FFA_Heptadecanoic Acid† [M-H]	534537	-1.43770	0.469	7.30e-03	-0.614805	0.493	0.634
EIC_310	316877	1.77121	0.579	7.52e-03	0.601133	0.416	0.579
Eicosanoid_11(12)-EpETE [M-H]	416960	1.20038	0.396	8.06e-03	0.216955	0.324	0.858
Novel EIC_6	233564	1.41788	0.468	8.21e-03	1.888007	0.550	0.393
Putative_Monolinolenin (9c,12c,15c)	341483	0.96634	0.320	8.28e-03	0.649357	0.391	0.538
Polar Molecule_GLYCOCHOLATE [M-H]	172623	5.33281	1.766	8.30e-03	-0.943291	0.689	0.610
Eicosanoid_12S-HpEPE [M-H]	382329	1.22916	0.407	8.30e-03	0.179429	0.472	0.921
Putative_Bilirubin	528314	-1.28176	0.425	8.43e-03	0.041251	0.444	0.986
EIC_14	394634	5.66913	1.892	8.86e-03	-0.346470	0.430	0.818
Putative_Androsterone glucuronide	172624	5.84306	1.957	9.12e-03	-1.211114	0.780	0.554
FAHFA_11	521853	-2.14747	0.720	9.17e-03	-0.773081	0.778	0.742
EIC_100	414042	1.92311	0.645	9.19e-03	0.377632	0.353	0.701
EIC_71	312209	2.71858	0.915	9.47e-03	0.410933	0.418	0.742
EIC_29	354579	1.73702	0.585	9.48e-03	0.424567	0.381	0.679
VLCDCA_15	533187	-1.01068	0.344	1.04e-02	-0.740859	0.429	0.507
EIC_358	264609	1.15875	0.395	1.04e-02	0.381090	0.424	0.793
VLCDCA_17	532515	-1.14451	0.391	1.07e-02	-0.314854	0.433	0.844
EIC_169	349398	1.18447	0.408	1.15e-02	0.445895	0.379	0.647
EIC_333	191164	-1.02497	0.355	1.21e-02	-0.282519	0.347	0.814
EIC_139	211121	2.19814	0.764	1.23e-02	0.622326	0.602	0.721
Eicosanoid_20cooh AA [M-H]	356342	1.49542	0.520	1.23e-02	0.530637	0.365	0.574
Polar Molecule_MYRISTATE [M-H]	519152	1.30817	0.456	1.25e-02	0.068766	0.460	0.979
Putative_Androsterone glucuronide	179343	4.91245	1.718	1.29e-02	-0.840089	0.583	0.579
FFA_Tricosenoic Acid [M-H]	542617	2.73217	0.958	1.32e-02	-0.566875	0.448	0.634
EIC_16	399201	1.64041	0.576	1.32e-02	0.058826	0.388	0.979
EIC_58	348012	3.08674	1.089	1.38e-02	0.834861	1.212	0.848
Putative_Glycocholic acid	179340	4.61845	1.635	1.41e-02	-1.024200	0.618	0.538
FAHFA_42	531450	-1.43806	0.510	1.43e-02	-0.014389	0.579	0.994
Bile Acid_Deoxycholic Acid [M-H+Acetate]	346895	13.01370	4.619	1.43e-02	0.392498	0.565	0.848
Polar Molecule_CORTISONE [M-H+Acetate]	118213	-1.09196	0.389	1.45e-02	-0.258998	0.470	0.888
EIC_106	378136	1.73776	0.618	1.45e-02	0.660478	0.468	0.596
EIC_318	136905	1.31443	0.468	1.46e-02	0.145228	0.293	0.900
Polar Molecule_ERUCATE [M-H+Acetate]	533386	2.43569	0.870	1.49e-02	-0.301003	0.482	0.868
EIC_47	197702	2.80954	1.010	1.56e-02	0.086675	0.684	0.986
Putative_Chenodeoxycholic acid 24-acyl-b-D-glucuronide	232936	3.25153	1.169	1.56e-02	-0.199141	0.403	0.900
EIC_135	321522	2.47962	0.891	1.56e-02	0.690125	0.585	0.647
Bile Acid_Glycoursodeoxycholic Acid [M-H]	169245	1.88380	0.682	1.65e-02	-0.447099	0.380	0.647
Bile Acid_Glycoursodeoxycholic Acid [M-H]	166774	2.16763	0.791	1.73e-02	0.024053	0.428	0.986
Putative_1a-Methyl-5a-androstan-3a,17b-diol glucuronide	96184	1.59891	0.583	1.73e-02	0.813915	0.572	0.591
EIC_91	329577	0.96311	0.352	1.76e-02	-0.087589	0.383	0.961
EIC_51	330923	1.31598	0.483	1.80e-02	0.109477	0.407	0.946
FAHFA_27	528052	-1.08410	0.399	1.83e-02	0.327020	0.511	0.868
Putative_Bilirubin	525957	-2.03680	0.754	1.90e-02	-1.587790	0.745	0.393
Endocannabinoid_N-oleoyl Dopamine [M-H]	528189	-1.31539	0.489	1.95e-02	-0.458284	0.522	0.793
EIC_157	292929	1.77426	0.661	1.99e-02	0.140210	0.497	0.946
EIC_86	450186	-0.95135	0.354	1.99e-02	-0.027592	0.326	0.986
Eicosanoid_15 oxoEDE [M-H]	479072	-1.30081	0.485	1.99e-02	-0.621433	0.504	0.634
EIC_143	315302	1.09335	0.409	2.01e-02	0.270168	0.401	0.854
Novel EIC_24	466757	1.67129	0.624	2.01e-02	0.022908	0.403	0.986
Putative_2a-Methyl-5a-androstan-3a-ol-17-one glucuronide	98088	1.10190	0.412	2.01e-02	0.477239	0.504	0.775
FFA_Palmitoleic Acid† [M-H+Acetate]	529152	-1.64079	0.616	2.09e-02	-1.131402	0.633	0.496
EIC_189	386159	-1.58942	0.601	2.18e-02	-1.279542	0.650	0.409
Putative_Chenodeoxycholic acid 24-acyl-b-D-glucuronide	242299	3.38187	1.283	2.24e-02	0.605562	0.635	0.771
Sterol_Estrone [M-H+Acetate]	202817	2.48609	0.948	2.32e-02	0.709988	0.653	0.691
Eicosanoid_13(S) HOTrE(y) [M-H]	373917	2.37947	0.909	2.34e-02	0.213023	0.400	0.888
EIC_10	440807	4.81840	1.848	2.40e-02	0.303599	0.412	0.840
FFA_Stearic Acid† [M-H]	533317	-1.20763	0.464	2.42e-02	-0.914961	0.459	0.409
EIC_189	381176	-1.01735	0.391	2.42e-02	-0.155407	0.426	0.922
FFA_Oleic Acid† [M-H+Acetate]	531868	-0.94433	0.363	2.42e-02	0.570657	0.359	0.550
Putative_11a-Hydroxyprogesterone b-D-glucuronide	269360	1.50064	0.578	2.43e-02	-0.164352	0.488	0.929
VLCDCA_23	535937	-1.07504	0.414	2.46e-02	-1.083559	0.420	0.393
Putative_Chenodeoxycholic acid 24-acyl-b-D-glucuronide	236149	3.06404	1.187	2.53e-02	0.665181	0.641	0.721
Putative_5a-Androstan-3a,17b-diol-17b-glucuronide	150234	-1.45089	0.564	2.56e-02	-0.691035	0.576	0.645
Bile Acid_b-Muricholic Acid [M-H]	237948	19.86988	7.726	2.56e-02	-0.915930	0.736	0.634
Eicosanoid_9(S) HOTrE [M-H]	353929	1.89841	0.738	2.56e-02	-0.293965	0.415	0.848
Novel EIC_13	423715	1.04519	0.407	2.56e-02	1.062374	0.442	0.393
Putative_1-Palmitoyl-2-hydroxy-sn-glycero-3-phosphoethanolamine	452730	-2.09974	0.817	2.56e-02	-2.231942	0.795	0.393
FAHFA_15	527360	-1.30177	0.507	2.56e-02	-0.067965	0.561	0.986
Bile Acid_Ursodeoxycholic acid [M-H+Acetate]	237318	3.67343	1.431	2.57e-02	-0.153889	0.428	0.922
VLCDCA_1	532475	-0.87710	0.343	2.66e-02	-0.445586	0.347	0.633
EIC_65	333119	4.68384	1.839	2.70e-02	-0.340778	0.714	0.902
FAHFA_59	532202	-1.32286	0.519	2.70e-02	0.153671	0.607	0.948
Eicosanoid_DHA [M-H+Acetate]	529467	-1.01409	0.399	2.71e-02	0.020080	0.376	0.986
EIC_314	153636	1.25207	0.493	2.74e-02	0.485033	0.343	0.596
Eicosanoid_13(S) HOTrE(y) [M-H+Acetate]	377311	-1.16971	0.461	2.74e-02	0.052962	0.581	0.986
Eicosanoid_11-dehydro-2,3-dinor-TXB2 [M-H+Acetate]	143490	-1.28772	0.508	2.76e-02	-0.259976	0.536	0.901
Eicosanoid_5,6-diHETrE [M-H]	383602	0.97113	0.384	2.77e-02	0.478033	0.369	0.633
EIC_72	439727	-1.45670	0.576	2.77e-02	-1.536263	0.557	0.393
Bile Acid_Ursodeoxycholic acid [M-H]	232041	-1.16605	0.461	2.77e-02	-0.423090	0.499	0.796
FFA_Stearidonic Acid [M-H]	488156	-3.39257	1.347	2.84e-02	-2.475499	1.279	0.409
VLCDCA_17	534730	-0.93251	0.370	2.84e-02	-0.133957	0.515	0.946
EIC_88	373969	1.53919	0.612	2.86e-02	0.825995	0.520	0.550
Eicosanoid_14,15-DiHETE [M-H+Acetate]	298878	2.53516	1.009	2.87e-02	-0.186414	0.507	0.922
EIC_232	222789	1.15523	0.460	2.87e-02	0.257843	0.536	0.902
Polar Molecule_PALMITATE [M-H+Acetate]	527462	-1.17056	0.466	2.87e-02	0.375069	0.572	0.866
Eicosanoid_13(S) HOTrE(y) [M-H]	378072	2.21475	0.886	2.95e-02	0.140843	0.336	0.910
FFA_Pentadecanoic Acid† [M-H]	528566	-1.14783	0.460	2.95e-02	-0.219192	0.505	0.903
Eicosanoid_5,6-diHETrE [M-H]	390693	-1.69507	0.680	2.99e-02	-1.326844	0.761	0.504
EIC_125	190567	1.91708	0.770	3.00e-02	0.633898	1.184	0.888
FFA_Oleic Acid† [M-H]	531847	-0.96470	0.388	3.00e-02	0.192821	0.342	0.888
Putative_Levofloxacin	41558	0.95702	0.385	3.03e-02	0.445339	0.369	0.644
EIC_31	411585	-1.23282	0.497	3.06e-02	-0.327719	0.549	0.877
Eicosanoid_11-dehydro-TXB3 [M-H+Acetate]	146386	0.85936	0.347	3.08e-02	0.565025	0.292	0.409
Eicosanoid_13-oxoODE [M-H+Acetate]	408537	-1.29076	0.524	3.17e-02	0.300684	0.610	0.900
Putative_1-Stearoyl-2-hydroxy-sn-glycero-3-phosphoethanolamine	519992	-1.34085	0.546	3.22e-02	-1.167349	0.591	0.409
Endocannabinoid_Oleoyl Ethanolamide [M-H+Acetate]	520172	1.01933	0.416	3.26e-02	0.876190	0.386	0.393
Bile Acid_Ursodeoxycholic acid [M-H+Acetate]	232137	-1.04277	0.426	3.27e-02	-0.561282	0.447	0.634
EIC_83	335777	0.92943	0.382	3.37e-02	0.448160	0.348	0.633
EIC_183	455310	-1.02328	0.422	3.45e-02	0.087236	0.433	0.969
Eicosanoid_PGG2 [M-H+Acetate]	192014	-1.37294	0.569	3.55e-02	-0.991225	0.667	0.574
Polar Molecule_LUMICHROME [M-H]	51894	1.45154	0.605	3.70e-02	-0.396503	0.495	0.820
EIC_194	407696	2.02513	0.846	3.71e-02	0.600048	0.440	0.610
EIC_122	358178	1.17684	0.492	3.72e-02	0.245998	0.443	0.888
Novel EIC_13	426801	2.01198	0.842	3.74e-02	0.820911	0.480	0.507
FFA_Palmitic Acid† [M-H]	533569	-0.75757	0.318	3.81e-02	0.457370	0.418	0.689
EIC_229	184258	0.87722	0.369	3.82e-02	0.343953	0.385	0.793
EIC_250	191117	0.82878	0.349	3.82e-02	0.511576	0.379	0.611
EIC_71	298732	2.46364	1.035	3.82e-02	-0.046939	0.582	0.986
Bile Acid_Lithocholic Acid [M-H]	441724	0.97930	0.412	3.82e-02	0.643351	0.319	0.409
Eicosanoid_PGF1a [M-H]	171489	-1.03457	0.436	3.87e-02	-0.106486	0.438	0.954
FFA_Palmitic Acid† [M-H+Acetate]	534889	-0.72045	0.304	3.87e-02	0.094661	0.344	0.946
VLCDCA_28	544581	1.07285	0.453	3.87e-02	0.016147	0.383	0.987
EIC_20	393655	2.43305	1.031	3.94e-02	-0.069141	0.589	0.986
Bile Acid_Ursodeoxycholic acid [M-H]	237244	3.59471	1.528	4.02e-02	-0.135088	0.442	0.938
EIC_303	338181	1.28780	0.548	4.02e-02	0.532472	0.384	0.609
Eicosanoid_13,14-dihydro-PGF1a [M-H]	190593	1.55281	0.664	4.13e-02	0.717086	0.334	0.393
EIC_110	437709	1.35702	0.592	4.67e-02	0.315448	0.464	0.853
Eicosanoid_tetranor 12(R) HETE [M-H+Acetate]	320002	1.16981	0.511	4.72e-02	0.226649	0.422	0.888
FFA_Heptadecaenoic Acid† [M-H+Acetate]	531646	6.20716	2.723	4.80e-02	0.733836	0.588	0.634
Eicosanoid_8(S) HETrE [M-H+Acetate]	445744	1.85566	0.815	4.82e-02	-0.168753	0.438	0.920
EIC_26	441431	1.15173	0.509	5.01e-02	1.061348	0.497	0.393
Putative_Heneicosapentaenoic acid	524788	-0.99636	0.443	5.13e-02	0.879201	0.686	0.633
Eicosanoid_13,14-dihydro-15-keto-PGE1 [M-H]	215016	-2.14419	0.954	5.15e-02	-1.738204	0.997	0.504
Polar Molecule_BIOTIN [M-H]	31198	0.82056	0.365	5.16e-02	0.530127	0.364	0.574
EIC_110	433852	0.98075	0.438	5.23e-02	0.242294	0.374	0.868
Eicosanoid_11-dehydro-2,3-dinor-TXB2 [M-H+Acetate]	132844	2.40288	1.076	5.32e-02	-0.321358	0.412	0.837
Eicosanoid_11-dehydro-2,3-dinor-TXB2 [M-H+Acetate]	136286	1.15999	0.522	5.45e-02	-0.181353	0.358	0.899
EIC_312	348127	1.29870	0.587	5.57e-02	0.428146	0.434	0.742
Eicosanoid_7,17 dhDPA [M-H+Acetate]	286064	0.79639	0.361	5.62e-02	0.093084	0.314	0.941
EIC_176	370103	1.00571	0.456	5.62e-02	0.930319	0.459	0.409
FFA_Linoleic Acid† [M-H]	532109	-1.02350	0.464	5.62e-02	0.209190	0.532	0.917
EIC_15	406050	1.32434	0.601	5.63e-02	0.183355	0.471	0.919
Novel EIC_3	375923	1.20889	0.550	5.69e-02	0.309807	0.395	0.834
FFA_Heptadecaenoic Acid† [M-H+Acetate]	532124	-1.03079	0.470	5.74e-02	-0.101001	0.561	0.977
Putative_4-[5-[[4-[5-[acetyl(hydroxy)amino]pentylamino]-4-oxobutanoyl]-hydroxyamino]pentylamino]-4-oxobutanoic acid	390962	-0.76895	0.352	5.84e-02	-0.220251	0.440	0.900
Polar Molecule_NERVONATE [M-H]	537448	-1.00056	0.458	5.84e-02	0.263027	0.450	0.884
EIC_108	414045	1.17362	0.540	5.99e-02	0.632896	0.334	0.432
FFA_Nervonic Acid† [M-H]	541517	1.08983	0.502	0.0599	0.485169	0.330	0.574
FAHFA_18	522272	-0.79643	0.368	6.11e-02	0.909996	0.727	0.634
Eicosanoid_2,3-dinor-PGE1 [M-H+Acetate]	139967	0.67924	0.315	6.22e-02	1.044018	0.328	0.393
Eicosanoid_PGG2 [M-H+Acetate]	184987	-1.46965	0.686	6.39e-02	-0.207687	0.791	0.946
Eicosanoid_12-oxoETE [M-H]	423400	-1.03670	0.488	6.69e-02	0.355709	0.538	0.865
EIC_257	249793	0.98624	0.465	6.73e-02	0.342011	0.487	0.848
Putative_1-Stearoyl-2-hydroxy-sn-glycero-3-phosphoethanolamine	525188	-0.85601	0.406	6.84e-02	-0.460598	0.422	0.689
VLCDCA_23	533191	-0.79307	0.376	6.84e-02	-0.583325	0.416	0.598
FFA_Tricosenoic Acid [M-H]	541791	1.62475	0.770	6.84e-02	-1.412601	0.511	0.393
Eicosanoid_7,17 dhDPA [M-H+Acetate]	289392	0.79036	0.377	7.02e-02	0.466402	0.362	0.633
EIC_205	221256	0.94664	0.452	7.05e-02	0.209343	0.479	0.903
VLCDCA_6	532891	-1.45655	0.698	7.17e-02	-1.781105	0.720	0.393
EIC_177	262111	0.78773	0.378	7.17e-02	0.785137	0.361	0.393
FFA_Myristic Acid [M-H]	527646	0.74597	0.358	7.17e-02	0.139623	0.403	0.924
Putative_1a-Methyl-5a-androstan-3a,17b-diol glucuronide	100107	-0.80937	0.389	7.23e-02	-0.201011	0.453	0.903
Eicosanoid_18(+/-)-HETE [M-H+Acetate]	377399	0.83312	0.401	7.23e-02	0.717657	0.303	0.393
Putative_D-erythro-Sphingosine-1-phosphate	377404	0.99173	0.478	7.23e-02	0.724896	0.361	0.409
VLCDCA_44	547731	-0.67510	0.325	7.23e-02	-0.292945	0.422	0.848
Putative_5a-Androstan-3a,17b-diol-17b-glucuronide	157904	-1.06202	0.516	7.52e-02	-1.116698	0.512	0.393
FAHFA_27	531614	-1.05771	0.517	7.72e-02	-0.000128	0.562	1.000
FFA_Oleic Acid† [M-H]	530347	-0.94096	0.461	7.85e-02	0.689666	0.437	0.550
Bile Acid_Tauroursodeoxycholic acid [M-H]	164435	2.04626	1.006	7.95e-02	0.241831	0.978	0.952
EIC_65	321476	1.64876	0.813	8.03e-02	-1.020007	0.456	0.393
EIC_15	412685	-1.21096	0.608	8.71e-02	-0.300836	0.639	0.903
FFA_Tricosenoic Acid [M-H+Acetate]	537869	1.14687	0.576	8.71e-02	0.555377	0.380	0.574
Polar Molecule_LUMICHROME [M-H]	54898	3.92635	1.975	8.74e-02	-0.191286	0.620	0.938
Eicosanoid_14,15 LTC4 [M-H]	264928	2.08603	1.051	8.76e-02	2.663089	1.553	0.507
FFA_Linoleic Acid† [M-H]	528366	-0.70611	0.356	8.76e-02	0.410041	0.378	0.691
VLCDCA_12	535370	-0.92391	0.466	8.80e-02	-0.219094	0.586	0.922
Eicosanoid_14,15-diHETrE [M-H+Acetate]	323938	1.83809	0.932	8.97e-02	0.825325	0.878	0.776
EIC_68	383553	1.60977	0.824	9.34e-02	-0.810382	0.452	0.495
Polar Molecule_OLEOYL-GLYCEROL [M-H+Acetate]	528185	-1.13509	0.581	9.34e-02	-0.367947	0.612	0.877
VLCDCA_34	539456	-0.71673	0.367	9.37e-02	-0.213992	0.476	0.903
EIC_62	256944	2.58302	1.328	9.48e-02	-0.903706	0.522	0.507
Endocannabinoid_Oleoyl Ethanolamide [M-H+Acetate]	522175	-0.85371	0.440	9.52e-02	-0.946557	0.518	0.473
EIC_6	357386	-0.83410	0.431	9.53e-02	-0.510716	0.413	0.634
Eicosanoid_15(S) HEPE [M-H+Acetate]	371287	-1.04089	0.538	9.53e-02	0.545519	0.893	0.869
EIC_189	389030	0.72016	0.371	9.53e-02	0.998468	0.390	0.393
FFA_Stearidonic Acid [M-H]	481336	-1.06101	0.548	9.53e-02	0.558574	0.620	0.793
VLCDCA_2	533159	-0.84903	0.438	9.53e-02	-0.206750	0.466	0.903
EIC_104	401285	0.93314	0.487	9.96e-02	-0.138424	0.377	0.922
Eicosanoid_15d PGJ2 [M-H]	364658	0.83946	0.444	1.05e-01	0.927563	0.562	0.541
Eicosanoid_9-oxoOTrE [M-H+Acetate]	368320	-0.88058	0.468	1.06e-01	-0.297832	0.524	0.888
Eicosanoid_5,6-EET [M-H+Acetate]	470913	1.30381	0.692	1.06e-01	-0.520153	0.459	0.677
Eicosanoid_Arachidonic Acid [M-H]	527450	-0.58742	0.312	1.07e-01	0.453709	0.346	0.633
EIC_4	345300	0.55303	0.296	1.10e-01	0.293055	0.385	0.840
Eicosanoid_12-HHTrE [M-H+Acetate]	332750	0.73970	0.399	1.13e-01	0.864697	0.567	0.565
FFA_Docosaenoic Acid† [M-H]	537429	1.09397	0.591	1.13e-01	0.573186	0.367	0.551
VLCDCA_14	541584	1.43785	0.776	1.13e-01	0.084575	0.547	0.979
VLCDCA_26	539195	-0.74009	0.401	1.14e-01	-1.147799	0.466	0.393
EIC_80	358635	1.10524	0.600	1.14e-01	-0.216168	0.469	0.903
EIC_271	297019	-0.68227	0.371	1.15e-01	0.152085	0.371	0.910
EIC_82	445680	-0.65912	0.360	1.17e-01	0.127243	0.283	0.903
EIC_224	295140	0.73515	0.403	1.18e-01	0.143067	0.351	0.910
FAHFA_28	527378	-0.62502	0.344	1.19e-01	0.769458	0.393	0.409
Eicosanoid_12S-HpETE [M-H]	430722	0.84742	0.467	1.20e-01	-0.238253	0.350	0.853
EIC_135	324550	1.47439	0.817	1.22e-01	-0.038077	0.591	0.986
EIC_166	353621	1.16478	0.647	1.23e-01	0.180950	0.552	0.932
FAHFA_13	525986	-0.86010	0.479	1.24e-01	0.129723	0.432	0.939
Eicosanoid_19(R)-HETE [M-H]	367701	-0.55729	0.311	1.25e-01	0.234731	0.417	0.888
Novel EIC_14	448206	1.24683	0.703	1.29e-01	-0.038072	0.397	0.986
Putative_Abietic acid	514832	0.82663	0.466	1.29e-01	1.039988	0.535	0.409
FFA_Stearic Acid† [M-H+Acetate]	533106	-0.89160	0.503	1.29e-01	-0.140617	0.505	0.946
FFA_Linoleic Acid† [M-H+Acetate]	528408	-0.74631	0.422	1.29e-01	0.880628	0.538	0.550
EIC_135	316724	1.43487	0.815	1.32e-01	0.494628	0.846	0.884
Putative_1-Stearoyl-2-hydroxy-sn-glycero-3-phosphoethanolamine	521802	0.64375	0.367	1.33e-01	0.168935	0.387	0.903
EIC_122	365097	1.36166	0.777	1.34e-01	-0.017255	0.559	0.993
Novel EIC_33	460414	0.91252	0.523	1.35e-01	0.610706	0.472	0.633
Putative_7a,17a-Dimethyl-5b-androstane-3a,17b-diol glucuronide	210760	-1.41993	0.815	1.36e-01	-0.357800	0.929	0.920
Polar Molecule_ROSMARINATE [M-H]	46338	0.81351	0.469	1.38e-01	0.827539	0.753	0.685
Putative_Hydrocortisone	107173	0.59561	0.346	1.41e-01	-0.328335	0.277	0.647
Bile Acid_Ursodeoxycholic acid [M-H+Acetate]	241332	1.31980	0.777	1.48e-01	0.686467	0.425	0.550
Endocannabinoid_Stearoyl Ethanolamide [M-H+Acetate]	530121	-0.73060	0.430	1.48e-01	-0.822630	0.387	0.393
Novel EIC_1	405831	0.70774	0.417	1.48e-01	1.158097	0.453	0.393
Putative_Decylbenzenesulfonic acid	418979	1.60447	0.947	1.48e-01	-0.416731	0.339	0.634
Eicosanoid_15-epi-PGA1 [M-H+Acetate]	248240	0.78289	0.464	1.50e-01	1.010829	0.576	0.504
Eicosanoid_17,18-DiHETE [M-H+Acetate]	263807	0.81625	0.484	1.50e-01	-0.063289	0.415	0.979
VLCDCA_45	534494	-0.73474	0.435	1.50e-01	-0.448019	0.555	0.818
Novel EIC_18	420737	0.62049	0.370	1.52e-01	0.788394	0.373	0.393
EIC_178	244703	0.63662	0.383	1.56e-01	0.075080	0.381	0.969
Sterol_11-Deoxycorticosterone [M-H+Acetate]	228510	0.61074	0.368	1.57e-01	0.557685	0.438	0.634
Eicosanoid_PDX [M-H+Acetate]	282516	0.84735	0.512	1.58e-01	0.342139	0.487	0.848
Putative_Codeine-6-b-D-glucuronide	119896	2.11263	1.277	1.58e-01	2.997980	1.891	0.550
EIC_225	261389	0.57340	0.348	1.59e-01	0.785519	0.342	0.393
VLCDCA_7	539773	1.75125	1.068	1.62e-01	-0.500517	0.508	0.742
FAHFA_71	537708	1.24639	0.764	1.65e-01	0.553294	0.513	0.695
EIC_250	186140	0.73040	0.451	1.69e-01	0.040541	0.509	0.986
Eicosanoid_5S-HpEPE [M-H+Acetate]	402588	-0.59417	0.371	1.74e-01	-0.842250	0.342	0.393
Putative_3-Hydroxystanozolol glucuronide	271639	-0.70744	0.442	1.74e-01	-0.169716	0.469	0.922
Eicosanoid_13,14-dihydro-15-keto-tetranor-PGD2 [M-H+Acetate]	125018	0.64792	0.410	1.81e-01	0.438255	0.441	0.742
FAHFA_56	530580	0.85742	0.544	1.82e-01	0.014970	0.751	0.994
VLCDCA_11	533173	-0.69925	0.445	1.83e-01	-0.320034	0.489	0.866
EIC_14	387514	1.59233	1.013	1.83e-01	-0.771274	0.691	0.679
EIC_102	446037	-0.82805	0.529	1.84e-01	0.227836	0.508	0.903
Eicosanoid_8,9-diHETrE [M-H]	357813	0.52432	0.338	1.90e-01	0.451474	0.364	0.634
EIC_77	435704	0.89823	0.580	1.90e-01	0.006958	0.482	0.997
Putative_Codeine-6-b-D-glucuronide	111091	1.98566	1.284	1.90e-01	2.556630	1.747	0.574
EIC_111	443405	-0.62482	0.410	1.99e-01	0.046264	0.428	0.986
Polar Molecule_CORTEXOLONE [M-H]	153590	-0.80832	0.535	2.03e-01	-1.442180	0.527	0.393
FAHFA_37	528301	-0.56068	0.372	2.05e-01	0.765052	0.448	0.507
EIC_109	403246	-4.15218	2.761	2.05e-01	0.296938	3.820	0.986
EIC_100	410589	0.69807	0.469	2.11e-01	0.492525	0.426	0.659
FFA_a-linolenic Acid† [M-H+Acetate]	520570	-0.68802	0.463	2.11e-01	-0.033040	0.393	0.986
VLCDCA_40	537628	0.91049	0.613	2.11e-01	-0.649807	0.563	0.659
Eicosanoid_14(15) EpETE [M-H]	408497	0.56121	0.384	2.21e-01	0.549442	0.362	0.565
EIC_23	437680	1.13443	0.779	2.22e-01	-0.491987	0.563	0.793
EIC_182	323049	0.86909	0.601	2.25e-01	0.294380	0.546	0.888
EIC_166	350670	1.42426	0.990	2.28e-01	-0.583970	0.517	0.679
Docosanoid_7,8-DiHDPA [M-H]	364273	-0.53535	0.375	2.32e-01	-0.055694	0.346	0.978
EIC_147	293675	1.35004	0.958	2.41e-01	0.414853	0.648	0.868
FAHFA_12	520493	-0.59293	0.425	2.46e-01	0.226788	0.439	0.892
Putative_1-Arachidoyl-2-hydroxy-sn-glycero-3-phosphocholine	525258	-0.40467	0.290	2.46e-01	0.056260	0.540	0.986
Polar Molecule_NERVONATE [M-H+Acetate]	536198	1.22611	0.883	2.48e-01	-1.159449	0.532	0.393
Eicosanoid_tetranor 12(R) HETE [M-H]	331464	0.80164	0.581	2.51e-01	-0.389488	0.517	0.840
VLCDCA_1	531095	-0.79726	0.578	2.52e-01	0.234385	0.711	0.932
Polar Molecule_PALMITATE [M-H+Acetate]	529748	0.68042	0.495	2.52e-01	0.390564	0.388	0.742
Polar Molecule_N-ACETYLTRYPTOPHAN [M-H]	45049	1.05443	0.768	2.53e-01	-0.286161	0.618	0.903
Eicosanoid_5,6-diHETrE [M-H]	386644	0.62814	0.462	2.58e-01	0.634383	0.532	0.647
Eicosanoid_Arachidonic Acid [M-H]	525365	-0.68527	0.504	2.59e-01	0.356098	0.427	0.804
Novel EIC_6	221883	0.53431	0.395	2.61e-01	0.286212	0.385	0.840
Putative_6-((E)-2-((1R,2S,3R,5S)-3,5-Dihydroxy-2-((Z)-oct-2-enyl)cyclopentyl)vinyl)tetrahydro-2H-pyran-2-one	167035	0.52808	0.394	2.67e-01	0.439401	0.357	0.634
FFA_Linoleic Acid† [M-H+Acetate]	526555	-0.73675	0.552	2.68e-01	-0.715738	0.602	0.647
Putative_7-Keto-3a,12-a-dihydroxycholanic acid	173610	0.74998	0.564	2.70e-01	0.799738	0.529	0.569
Putative_N-Oleoyl-L-serine	517674	-0.50073	0.376	2.70e-01	0.054282	0.386	0.984
Eicosanoid_13,14-dihydro-PGE1 [M-H]	189965	-0.90418	0.680	2.70e-01	-0.620620	0.780	0.824
VLCDCA_34	537603	-0.53732	0.406	2.71e-01	-0.558880	0.419	0.620
EIC_1	325888	0.74308	0.566	2.76e-01	-0.076624	0.474	0.978
Polar Molecule_CORTISOL [M-H+Acetate]	100025	0.45512	0.347	2.77e-01	-0.077165	0.292	0.946
EIC_122	368273	0.72593	0.554	2.77e-01	0.203886	0.568	0.922
VLCDCA_7	542382	0.50253	0.386	2.80e-01	0.368026	0.426	0.793
EIC_15	409677	-0.61408	0.472	2.80e-01	-0.267455	0.483	0.888
Eicosanoid_EPA [M-H]	518723	-0.49374	0.380	2.81e-01	0.236598	0.409	0.886
FAHFA_29	529339	-0.58971	0.455	2.82e-01	-0.400779	0.397	0.739
Polar Molecule_CORTEXOLONE [M-H+Acetate]	159612	-0.43521	0.338	2.86e-01	-0.199805	0.422	0.902
FAHFA_48	528338	-0.55759	0.434	2.86e-01	0.849179	0.538	0.550
Polar Molecule_Tetrahydrocortisol [M-H+Acetate]	123097	-0.73647	0.574	2.87e-01	-0.416227	0.557	0.840
Novel EIC_35	136210	-0.49295	0.385	2.87e-01	-0.690522	0.322	0.393
Polar Molecule_CORTICOSTERONE [M-H+Acetate]	140738	-0.46244	0.363	2.90e-01	-0.410122	0.339	0.644
VLCDCA_23	534469	-0.66943	0.531	2.96e-01	-1.187311	0.533	0.393
VLCDCA_1	534965	-0.59413	0.472	2.97e-01	-1.063787	0.521	0.409
EIC_158	235415	1.34833	1.080	3.01e-01	0.446645	0.917	0.901
EIC_184	334912	0.56409	0.452	3.01e-01	-0.312208	0.414	0.840
VLCDCA_2	534195	-0.53426	0.430	3.03e-01	-0.560276	0.423	0.625
Eicosanoid_18(+/-)-HETE [M-H+Acetate]	374735	0.55396	0.448	3.04e-01	0.842862	0.504	0.532
EIC_33	446442	0.74508	0.603	3.04e-01	-0.027823	0.395	0.986
FFA_Tricosenoic Acid [M-H+Acetate]	536191	0.51693	0.418	3.04e-01	0.266709	0.410	0.868
Eicosanoid_14,15-EET [M-H+Acetate]	444412	0.50212	0.410	3.10e-01	0.669315	0.345	0.409
Docosanoid_7-epi-Maresin 1 [M-H+Acetate]	254854	-2.05311	1.685	3.13e-01	-1.798617	1.690	0.702
Putative_Dodecylbenzenesulfonic acid	403895	0.83349	0.685	3.13e-01	-0.247468	0.469	0.890
EIC_22	406441	0.65273	0.543	3.20e-01	-0.068720	0.402	0.978
FAHFA_69	545400	0.82983	0.697	3.25e-01	-0.996869	0.526	0.432
FAHFA_4	509868	-1.24981	1.050	3.26e-01	-1.128243	1.172	0.764
EIC_177	263648	0.61738	0.525	3.32e-01	-0.212325	0.539	0.917
EIC_177	274066	0.75563	0.642	3.32e-01	0.331914	0.683	0.901
EIC_15	410919	0.45068	0.387	3.38e-01	0.881117	0.380	0.393
FAHFA_11	520688	-0.54217	0.472	3.45e-01	0.301872	0.436	0.848
Eicosanoid_PGE3 [M-H+Acetate]	145653	-0.42083	0.368	3.46e-01	-0.106509	0.331	0.936
EIC_188	171462	-0.45177	0.395	3.46e-01	-0.364540	0.368	0.742
Docosanoid_MCTR2 [M-H]	208505	0.54636	0.477	3.46e-01	0.815272	0.398	0.409
VLCDCA_8	534206	-0.54328	0.474	3.46e-01	-1.053771	0.460	0.393
Polar Molecule_allo-Tetrahydrocortisol [M-H+Acetate]	84478	0.47709	0.417	3.46e-01	-0.072833	0.433	0.978
VLCDCA_6	534200	-0.56011	0.492	3.48e-01	-0.479719	0.538	0.793
Putative_2a-Methyl-5a-androstan-3a-ol-17-one glucuronide	92507	0.52944	0.468	3.52e-01	-0.195625	0.436	0.903
Polar Molecule_ELAIDATE [M-H+Acetate]	527688	0.58329	0.519	3.55e-01	1.119370	0.638	0.504
Putative_4-[5-[[4-[5-[acetyl(hydroxy)amino]pentylamino]-4-oxobutanoyl]-hydroxyamino]pentylamino]-4-oxobutanoic acid	381293	-0.58856	0.527	3.58e-01	0.498104	0.566	0.793
EIC_146	251251	0.62776	0.565	3.60e-01	1.054000	0.893	0.647
Eicosanoid_DHA [M-H]	529758	-0.38828	0.349	3.60e-01	1.649356	0.637	0.393
VLCDCA_11	534221	-0.55859	0.507	3.65e-01	-0.696605	0.542	0.633
VLCDCA_11	537154	-0.40686	0.372	3.69e-01	-0.473360	0.346	0.610
EIC_322	247451	0.38403	0.352	3.70e-01	-0.733332	0.336	0.393
Docosanoid_7(S),17(S)-hydroxy DPA [M-H+Acetate]	275325	-0.49137	0.456	3.76e-01	0.652431	0.489	0.620
Docosanoid_7,8-DiHDPA [M-H+Acetate]	364346	0.52369	0.485	3.76e-01	-0.259317	0.445	0.884
FFA_a-linolenic Acid† [M-H]	520524	-0.45782	0.428	3.81e-01	0.263313	0.366	0.845
EIC_224	298220	0.71300	0.672	3.85e-01	0.050031	0.499	0.986
Novel EIC_44	186232	0.43337	0.410	3.87e-01	-0.008703	0.382	0.994
VLCDCA_28	542127	0.52610	0.499	3.88e-01	-0.131101	0.545	0.955
EIC_338	297072	-0.46602	0.448	3.95e-01	0.617266	0.418	0.574
Eicosanoid_11(12)-EpETE [M-H]	421508	0.61432	0.597	4.01e-01	1.146750	0.494	0.393
VLCDCA_6	535897	-0.44104	0.429	4.02e-01	-0.751002	0.400	0.444
EIC_303	328235	0.53193	0.519	4.03e-01	0.053468	0.567	0.986
EIC_351	175055	0.40024	0.393	4.05e-01	-0.001583	0.370	0.999
Putative_Tauroursodeoxycholic acid	181279	0.68838	0.675	4.05e-01	1.096225	0.898	0.639
Putative_Abietic acid	518727	-0.38526	0.379	4.06e-01	0.289499	0.429	0.854
Eicosanoid_LTB4 ethanol amide [M-H+Acetate]	227844	-0.41019	0.404	4.07e-01	0.040748	0.424	0.986
FFA_Eicosenoic Acid [M-H+Acetate]	534432	0.58724	0.580	4.07e-01	-0.296617	0.509	0.884
EIC_105	382736	0.33746	0.334	4.08e-01	0.472295	0.374	0.634
EIC_263	208281	0.29578	0.294	4.09e-01	0.426404	0.335	0.634
Polar Molecule_CORTISOL [M-H]	111875	0.59971	0.599	4.11e-01	-0.772490	0.443	0.504
Polar Molecule_PALMITOLEATE [M-H]	521338	-0.58266	0.581	4.11e-01	0.267751	0.561	0.902
EIC_178	254050	-1.79696	1.807	4.15e-01	-1.300241	1.852	0.848
FFA_Myristic Acid [M-H]	520512	0.40802	0.411	4.15e-01	0.244380	0.399	0.869
EIC_158	232601	-0.43849	0.446	4.19e-01	-0.399451	0.463	0.793
EIC_178	245971	0.81132	0.827	4.19e-01	0.552960	0.984	0.888
EIC_343	395749	0.88388	0.901	4.19e-01	-0.945244	0.637	0.574
Polar Molecule_CORTEXOLONE [M-H+Acetate]	155822	0.53780	0.556	4.27e-01	-0.285354	0.434	0.866
Bile Acid_Ursodeoxycholic acid [M-H+Acetate]	244872	0.60775	0.630	4.28e-01	0.095316	0.471	0.969
EIC_87	390659	0.47282	0.493	4.30e-01	0.074736	0.443	0.978
EIC_124	238208	0.44447	0.486	4.58e-01	0.614517	0.606	0.738
EIC_146	245286	0.57443	0.633	4.63e-01	0.342619	0.620	0.888
Putative_Levofloxacin	36118	0.38315	0.432	4.75e-01	0.005003	0.484	0.997
EIC_124	240491	0.61922	0.704	4.77e-01	0.053883	0.979	0.986
Eicosanoid_11t LTE4 [M-H+Acetate]	275412	0.36438	0.413	4.77e-01	0.469580	0.421	0.679
Putative_Levofloxacin	34432	0.24620	0.281	4.77e-01	-0.556338	0.377	0.574
Eicosanoid_11(12)-EpETE [M-H+Acetate]	421573	-0.48298	0.553	4.77e-01	-0.816788	0.520	0.550
Eicosanoid_DHA [M-H]	523275	-0.39904	0.456	4.77e-01	1.260962	0.735	0.507
FFA_Eicosenoic Acid [M-H]	533336	-0.35659	0.406	4.77e-01	0.534100	0.453	0.647
FFA_Docosaenoic Acid† [M-H+Acetate]	535281	0.34512	0.391	4.77e-01	0.416249	0.474	0.793
FFA_Arachidic Acid† [M-H]	536380	-0.65073	0.742	4.77e-01	-1.824780	0.647	0.393
VLCDCA_32	537601	-0.39801	0.454	4.77e-01	-0.315178	0.445	0.848
Putative_5a-Androstan-3a,17b-diol-17b-glucuronide	159009	-0.47247	0.543	4.78e-01	-0.584004	0.470	0.634
Polar Molecule_LUMICHROME [M-H]	57910	2.11843	2.437	4.79e-01	-1.593397	1.039	0.565
FFA_Arachidic Acid† [M-H]	535084	-0.54074	0.626	4.80e-01	-0.815167	0.588	0.609
Polar Molecule_PALMITOLEATE [M-H+Acetate]	520124	0.38331	0.448	4.85e-01	0.298588	0.509	0.884
Eicosanoid_12epi LTB4 [M-H+Acetate]	285289	0.44316	0.521	4.88e-01	-0.112030	0.405	0.946
EIC_138	201561	0.47418	0.559	4.89e-01	-0.057796	0.438	0.986
Eicosanoid_19(R)-HETE [M-H]	362815	0.31610	0.376	4.93e-01	0.508178	0.344	0.574
Novel EIC_40	183709	0.31466	0.376	4.95e-01	0.199838	0.370	0.888
Polar Molecule_CORTISOL [M-H+Acetate]	111953	0.50910	0.615	5.01e-01	-0.628303	0.457	0.610
Putative_7a,17a-Dimethyl-5b-androstane-3a,17b-diol glucuronide	203097	-0.78893	0.964	5.06e-01	-0.097451	1.035	0.986
VLCDCA_14	537555	-0.47498	0.590	5.14e-01	-0.538557	0.582	0.784
EIC_178	251262	-1.12849	1.404	5.14e-01	-1.054026	1.510	0.848
Putative_1-Palmitoyl-2-hydroxy-sn-glycero-3-phosphoethanolamine	444474	0.32781	0.409	5.16e-01	-0.171340	0.384	0.903
Eicosanoid_tetranor-PGFM [M-H]	31459	-0.54407	0.689	5.23e-01	0.031396	0.688	0.986
Putative_Hydrocortisone 21-hemisuccinate	111837	0.45131	0.576	5.26e-01	-0.617096	0.428	0.579
Novel EIC_6	225577	0.29030	0.385	5.46e-01	0.941121	0.353	0.393
EIC_181	341438	0.33177	0.441	5.47e-01	0.665591	0.386	0.507
Putative_3-Hydroxystanozolol glucuronide	281952	-0.38642	0.519	5.51e-01	0.281975	0.709	0.917
VLCDCA_44	544161	-0.31675	0.427	5.53e-01	-0.550717	0.423	0.633
EIC_354	155807	-0.38686	0.524	5.53e-01	-0.337466	0.539	0.868
Eicosanoid_17,18-DiHETE [M-H+Acetate]	268636	0.29105	0.395	5.53e-01	0.403627	0.410	0.742
Polar Molecule_OLEOYL-GLYCEROL [M-H]	531324	-0.51833	0.702	5.53e-01	-0.510554	0.575	0.793
Putative_4-Androsten-17b-ol-3-one glucosiduronate	158439	0.42762	0.592	5.62e-01	0.315243	0.505	0.868
FAHFA_69	542169	-0.32902	0.455	5.62e-01	-0.483075	0.477	0.738
Putative_a-Hyodeoxycholic acid methyl ester	343493	0.34409	0.486	5.72e-01	0.064805	0.476	0.985
VLCDCA_1	533929	-0.31714	0.451	5.74e-01	-0.356565	0.443	0.818
Putative_1,3,5(10)-Estratrien-3,17b-diol 17-glucosiduronate	271516	-0.43346	0.621	5.76e-01	0.035235	0.511	0.986
EIC_191	412743	0.39591	0.566	5.76e-01	0.418588	0.399	0.714
Docosanoid_Resolvin E1 [M-H+Acetate]	110221	0.27046	0.389	5.76e-01	0.152373	0.478	0.936
Eicosanoid_15 oxoEDE [M-H+Acetate]	467225	0.59455	0.856	5.76e-01	-1.048463	0.497	0.393
Putative_Oxymorphone 3-b-D-glucuronide	90626	0.30760	0.442	5.76e-01	1.829755	0.928	0.409
EIC_144	256466	0.36727	0.542	5.88e-01	-0.012731	0.526	0.994
Putative_Androstan-3-ol-17-one 3-glucuronide	167264	-0.34537	0.512	5.90e-01	-0.377568	0.509	0.840
EIC_80	365075	0.35166	0.523	5.90e-01	0.230933	0.463	0.900
EIC_138	191819	0.52139	0.784	5.95e-01	-0.603753	0.682	0.793
Sterol_11-keto-testosterone [M-H+Acetate]	157340	-0.28919	0.437	5.96e-01	0.194358	0.426	0.903
Bile Acid_Lithocholic Acid [M-H+Acetate]	441749	0.33364	0.506	5.97e-01	-0.036996	0.394	0.986
Bile Acid_Chenodeoxycholic acid [M-H+Acetate]	329139	1.33162	2.037	5.99e-01	-0.354826	1.288	0.946
Eicosanoid_10-Nitrooleate [M-H]	510123	-0.25428	0.389	5.99e-01	-0.111830	0.418	0.946
Polar Molecule_LIOTHYRONINE [M-H]	116699	-0.33183	0.511	5.99e-01	-0.545683	0.404	0.611
Eicosanoid_13,14-dihydro-PGE1 [M-H]	198449	-0.28934	0.445	5.99e-01	-0.064732	0.298	0.962
FFA_a-linolenic Acid† [M-H]	517566	0.39837	0.611	5.99e-01	0.342507	0.398	0.793
EIC_192	402518	0.32909	0.518	6.09e-01	0.376157	0.397	0.775
Eicosanoid_15S-HpETE [M-H]	413128	0.34047	0.546	6.17e-01	-0.517498	0.420	0.634
VLCDCA_14	540389	0.63853	1.072	6.37e-01	-1.025019	0.816	0.634
Endocannabinoid_N-arachidonoyl Dopamine [M-H+Acetate]	518573	-0.24024	0.405	6.38e-01	0.295818	0.405	0.844
FFA_Nervonic Acid† [M-H]	545847	0.35068	0.597	6.41e-01	-0.658429	0.437	0.571
Putative_4-Androsten-17b-ol-3-one glucosiduronate	153131	-0.35100	0.601	6.43e-01	-0.543654	0.576	0.776
FAHFA_8	518912	-0.27866	0.481	6.45e-01	0.331935	0.532	0.868
Polar Molecule_Tetrahydrocortisol [M-H+Acetate]	138195	-0.25828	0.450	6.48e-01	0.095106	0.435	0.962
FFA_Arachidic Acid† [M-H+Acetate]	534912	-0.33861	0.594	6.50e-01	-0.868075	0.553	0.550
EIC_158	238213	-1.27637	2.272	6.55e-01	-3.896237	1.993	0.409
EIC_185	397318	0.50657	0.907	6.57e-01	-0.649743	0.617	0.712
Putative_2-Hydroxypalmitic acid	518068	0.24154	0.445	6.68e-01	0.551572	0.375	0.574
Polar Molecule_VITAMIN D2 [M-H]	531344	0.32869	0.608	6.69e-01	0.562514	0.606	0.784
Polar Molecule_N-ACETYLTRYPTOPHAN [M-H+Acetate]	49032	-0.33883	0.636	6.74e-01	-0.193586	0.568	0.926
Eicosanoid_PGF1a [M-H]	174973	-0.20749	0.394	6.77e-01	0.913811	0.432	0.393
Docosanoid_7(S),17(S)-hydroxy DPA [M-H+Acetate]	283207	0.29320	0.558	6.77e-01	-0.041712	0.580	0.986
Eicosanoid_13,14-dihydro-15-keto-tetranor-PGF1alpha [M-H+Acetate]	125021	0.18492	0.361	6.86e-01	0.629794	0.460	0.610
Putative_7a,17a-Dimethyl-5b-androstane-3a,17b-diol glucuronide	199356	-0.47017	0.919	6.86e-01	-0.730436	0.780	0.777
EIC_185	398537	-0.26834	0.528	6.88e-01	-0.835947	0.574	0.574
EIC_31	407392	-0.30085	0.594	6.88e-01	0.319564	0.518	0.869
Eicosanoid_14,15 LTD4 [M-H+Acetate]	258994	0.13848	0.275	6.89e-01	0.649763	0.386	0.525
Eicosanoid_13(S) HOTrE [M-H+Acetate]	365619	0.23410	0.468	6.91e-01	-0.009451	0.468	0.994
Bile Acid_Glycoursodeoxycholic Acid [M-H]	173155	0.40420	0.823	6.95e-01	-1.220470	0.756	0.550
Eicosanoid_13,14-dihydro-PGE1 [M-H]	195187	0.19488	0.395	6.95e-01	0.750971	0.375	0.409
Eicosanoid_12-HETE [M-H+Acetate]	425444	-0.26939	0.548	6.95e-01	-0.281379	0.661	0.906
FAHFA_69	541292	-0.19247	0.396	6.98e-01	-0.315962	0.426	0.840
Polar Molecule_GAMMA-LINOLENATE [M-H+Acetate]	518129	0.34646	0.733	7.07e-01	-0.962956	0.642	0.574
Eicosanoid_tetranor-PGFM [M-H]	29345	0.23310	0.497	7.09e-01	1.021687	0.484	0.393
Putative_11a-Hydroxyprogesterone b-D-glucuronide	282628	-0.21443	0.475	7.22e-01	-0.429975	0.491	0.793
Putative_6-((E)-2-((1R,2S,3R,5S)-3,5-Dihydroxy-2-((Z)-oct-2-enyl)cyclopentyl)vinyl)tetrahydro-2H-pyran-2-one	174904	-0.19193	0.428	7.23e-01	0.857541	0.429	0.409
FFA_Stearidonic Acid [M-H+Acetate]	487076	-0.44853	1.041	7.36e-01	-0.162456	1.037	0.979
EIC_251	297013	-0.19349	0.455	7.39e-01	-0.391128	0.476	0.810
Eicosanoid_11-dehydro-2,3-dinor-TXB2 [M-H+Acetate]	128452	0.21774	0.519	7.42e-01	0.270445	0.495	0.888
Polar Molecule_STEARATE [M-H]	530351	-0.21741	0.518	7.42e-01	0.247636	0.520	0.902
Bile Acid_Glycoursodeoxycholic Acid [M-H+Acetate]	181294	0.19982	0.485	7.47e-01	-0.176903	0.409	0.903
EIC_122	361269	0.17826	0.440	7.51e-01	-0.142640	0.430	0.932
Eicosanoid_15S-HpETE [M-H]	407687	-0.20466	0.562	7.81e-01	-0.109701	0.505	0.962
Bile Acid_Lithocholic Acid [M-H]	442558	0.21974	0.605	7.81e-01	-0.260765	0.453	0.886
Eicosanoid_8,9-diHETrE [M-H+Acetate]	365688	0.19128	0.532	7.81e-01	0.045958	0.472	0.986
EIC_7	401671	0.20253	0.564	7.81e-01	1.281578	0.636	0.409
FFA_Eicosadienoic Acid† [M-H+Acetate]	531329	-0.15558	0.440	7.85e-01	0.830008	0.601	0.610
Polar Molecule_ELAIDATE [M-H]	527169	-0.74815	2.156	7.89e-01	2.906907	3.449	0.797
Eicosanoid_15-epi-PGA1 [M-H+Acetate]	244131	0.12906	0.385	7.97e-01	0.031025	0.490	0.986
EIC_329	263763	0.12446	0.397	8.14e-01	0.167775	0.410	0.910
VLCDCA_15	533973	-0.13353	0.435	8.17e-01	-0.518486	0.468	0.679
Eicosanoid_13-oxoODE [M-H+Acetate]	402537	-0.12106	0.398	8.18e-01	-0.174969	0.409	0.905
Novel EIC_10	347387	0.16382	0.549	8.20e-01	-0.130772	0.429	0.938
VLCDCA_41	540711	0.18679	0.626	8.20e-01	-0.541056	0.636	0.796
Eicosanoid_5,6-EET [M-H]	467558	0.13580	0.474	8.28e-01	0.876141	0.319	0.393
FFA_Oleic Acid† [M-H+Acetate]	532675	-0.17171	0.604	8.28e-01	-0.178912	0.628	0.946
VLCDCA_42	544630	-0.11117	0.390	8.28e-01	-0.500160	0.404	0.634
EIC_225	266128	0.10507	0.372	8.28e-01	0.873321	0.380	0.393
VLCDCA_8	532895	0.09168	0.339	8.37e-01	-0.378662	0.363	0.718
Eicosanoid_13,14-dihydro-PGF1a [M-H]	195192	0.11144	0.417	8.38e-01	0.656549	0.487	0.611
Eicosanoid_PGE3 [M-H+Acetate]	148936	-0.11545	0.440	8.41e-01	-0.240396	0.375	0.868
FAHFA_14	522914	0.12372	0.475	8.41e-01	-0.283013	0.463	0.869
Docosanoid_7(S),17(S)-hydroxy DPA [M-H+Acetate]	263855	0.11809	0.463	8.45e-01	0.114125	0.484	0.956
VLCDCA_42	540422	-0.12777	0.508	8.46e-01	-0.911755	0.436	0.402
Bile Acid_Ursodeoxycholic acid [M-H]	245404	0.15848	0.678	8.59e-01	-0.156179	0.584	0.946
FFA_Pentadecanoic Acid† [M-H]	527657	0.12261	0.550	8.67e-01	-0.180187	0.458	0.917
Eicosanoid_LTF4 [M-H]	266556	-0.09823	0.463	8.73e-01	0.966149	0.413	0.393
FFA_Arachidic Acid† [M-H]	541489	-0.11939	0.561	8.73e-01	-0.540655	0.460	0.647
VLCDCA_38	530224	-0.08109	0.410	8.84e-01	-0.188875	0.463	0.910
Polar Molecule_LUMICHROME [M-H]	63608	0.36741	1.884	8.85e-01	-2.114742	1.074	0.409
FFA_a-linolenic Acid† [M-H]	527674	-0.09806	0.515	8.87e-01	0.155013	0.437	0.922
FAHFA_12	523559	0.11004	0.586	8.88e-01	0.267039	0.648	0.910
FFA_Palmitoleic Acid† [M-H+Acetate]	523988	0.14830	0.798	8.88e-01	-0.842355	0.540	0.551
Eicosanoid_11-HETE [M-H+Acetate]	423143	-0.09015	0.518	8.97e-01	-0.574718	0.425	0.611
EIC_55	297605	-0.06727	0.400	9.00e-01	-0.149674	0.390	0.920
EIC_356	208342	0.05051	0.364	9.23e-01	-0.180573	0.318	0.888
Eicosanoid_15k PGF2a [M-H+Acetate]	109511	-0.05113	0.385	9.27e-01	-0.077220	0.385	0.969
Eicosanoid_11b PGE2 [M-H]	104963	0.06243	0.515	9.32e-01	-0.096117	0.374	0.946
EIC_71	305288	0.13043	1.070	9.32e-01	-1.441733	0.890	0.550
Docosanoid_10,11-DiHDPA [M-H+Acetate]	346852	0.07349	0.604	9.32e-01	-0.887170	0.474	0.446
VLCDCA_8	537536	-0.08308	0.749	9.39e-01	-1.613127	0.548	0.393
EIC_348	329017	-0.04606	0.423	9.39e-01	-0.318273	0.419	0.840
Putative_5a-Androstan-17b-ol-3-one glucosiduronate	201784	-0.06046	0.593	9.42e-01	-0.063050	0.859	0.986
Eicosanoid_14,15 LTE4 [M-H]	233290	0.04290	0.443	9.45e-01	1.008314	0.461	0.393
FFA_Docosadienoic Acid† [M-H]	539086	-0.08766	0.916	9.45e-01	-1.255110	0.797	0.550
FFA_Arachidic Acid† [M-H+Acetate]	537842	0.04131	0.466	9.49e-01	0.182891	0.526	0.924
EIC_189	392686	0.02749	0.393	9.62e-01	0.199943	0.382	0.890
EIC_250	195182	-0.02429	0.407	9.69e-01	0.105406	0.405	0.946
Eicosanoid_15t-Protectin D1 [M-H+Acetate]	275324	0.02325	0.403	9.69e-01	-0.100144	0.390	0.946
Putative_1a-Methyl-5a-androstan-3a,17b-diol glucuronide	108971	-0.02335	0.464	9.72e-01	0.035405	0.469	0.986
Polar Molecule_OLEOYL-GLYCEROL [M-H+Acetate]	527254	-0.02225	0.441	9.72e-01	-0.008485	0.438	0.994
VLCDCA_10	534972	0.02211	0.507	9.75e-01	-0.497920	0.449	0.679
Eicosanoid_8-iso-15-keto-PGE2 [M-H+Acetate]	178102	0.01167	0.358	9.82e-01	0.557606	0.423	0.629
EIC_101	433368	0.00896	0.396	9.89e-01	-0.066622	0.351	0.969
EIC_185	397724	0.00875	0.651	9.93e-01	-0.082470	0.662	0.986
EIC_24	422518	-0.00901	0.629	9.93e-01	-0.175438	0.577	0.938
VLCDCA_40	540421	0.00435	0.608	9.97e-01	-0.827686	0.534	0.554
Eicosanoid_Arachidonic Acid [M-H]	531480	-0.00172	0.502	9.97e-01	-0.353788	0.479	0.840
FFA_Arachidic Acid† [M-H]	537803	0.00224	0.599	9.97e-01	0.147696	0.574	0.946
Set of analyzed features where i) internal standards and ii) significant features from the control group only analysis have been exlcluded.

## Sheet: Supplementary Table 4.
Supplementary Table 4. The effect of eucaloric diet and fitness lifestyle on LC-MS-Metabolome in the control group of physique study participants
Annotation and adduct information		PRE-MID			PRE-POST
Metabolite ID	Matching ID	Estimate	Standard error	FDR	Estimate	Standard error	FDR
FFA_Heptadecanoic Acid [M-H+Acetate]	534128	-2.13	0.36	3.13e-06	-0.62	0.6	0.794
EIC_209	228440	1.51	0.27	1.22e-05	0.87	0.32	0.286
Eicosanoid_2,3-dinor-PGE1 [M-H+Acetate]	139967	1.72	0.35	0.000196	2.11	0.5	0.0121
Eicosanoid_11-dehydro-TXB3 [M-H+Acetate]	146386	1.26	0.26	0.000317	0.23	0.3	0.872
Putative_1-Stearoyl-2-hydroxy-sn-glycero-3-phosphoethanolamine	519992	-1.64	0.39	0.00319	0.66	1.26	0.932
Endocannabinoid_Oleoyl Ethanolamide [M-H+Acetate]	520172	2.16	0.51	0.00319	3.94	1.67	0.357
Eicosanoid_20cooh AA [M-H]	356342	1.46	0.36	0.00444	0.87	0.41	0.432
Eicosanoid_11(12)-EpETE [M-H]	421508	2.21	0.54	0.00444	2.06	0.81	0.349
Novel EIC_6	229056	1.28	0.32	0.00491	1.33	0.54	0.357
Polar Molecule_TRICOSANOATE [M-H]	540604	1.53	0.39	0.00732	1.08	0.33	0.137
Eicosanoid_5,6-EET [M-H]	473277	-1.58	0.42	0.01	-1.27	0.53	0.357
EIC_358	269922	1.75	0.49	0.0153	1.35	0.57	0.357
EIC_100	410589	2	0.56	0.0153	2.01	0.99	0.433
Putative_Levofloxacin	41558	1.26	0.35	0.0153	0.6	0.37	0.579
Eicosanoid_15 oxoEDE [M-H+Acetate]	467225	-2.14	0.6	0.0153	-1.78	0.64	0.263
Putative_1-Stearoyl-2-hydroxy-sn-glycero-3-phosphoethanolamine	525188	-1.52	0.42	0.0153	-0.84	0.52	0.582
Eicosanoid_15d PGJ2 [M-H]	364207	1.37	0.39	0.0177	0.68	0.38	0.501
EIC_205	215007	1.48	0.43	0.0181	0.81	0.48	0.529
Endocannabinoid_N-oleoyl Dopamine [M-H]	529004	-1.98	0.57	0.0181	-1.08	0.56	0.447
FFA_Eicosatrienoic Acid [M-H+Acetate]	534431	-1.35	0.39	0.0181	-0.83	0.54	0.592
EIC_72	439727	-1.64	0.47	0.0188	-0.75	0.61	0.745
Endocannabinoid_Oleoyl Ethanolamide [M-H+Acetate]	522175	-1.39	0.41	0.019	-0.87	0.7	0.745
FFA_Heptadecanoic Acid [M-H+Acetate]	534900	-2.39	0.7	0.02	-2.04	0.71	0.241
FFA_Heptadecanoic Acid [M-H]	534537	-1.46	0.43	0.0203	-0.63	0.62	0.794
FFA_Docosaenoic Acid [M-H]	535834	2.94	0.87	0.0203	1.71	0.99	0.518
FFA_Pentadecanoic Acid [M-H+Acetate]	531478	-1.73	0.52	0.0207	-0.85	0.79	0.782
FFA_Nervonic Acid [M-H]	541517	-1.12	0.34	0.0216	-1.06	0.5	0.431
EIC_205	212224	1.58	0.48	0.0223	0.2	0.33	0.932
FFA_Heptadecaenoic Acid [M-H+Acetate]	529424	-1.13	0.34	0.0223	-0.45	0.39	0.762
Polar Molecule_LUMICHROME [M-H]	54898	1.78	0.54	0.0223	1	0.27	0.0455
Putative_Levofloxacin	34432	1.07	0.33	0.0225	0.06	0.42	0.978
Eicosanoid_5,6-EET [M-H]	467558	1.57	0.48	0.0225	0.91	0.5	0.495
Eicosanoid_12S-HpETE [M-H]	430722	1.93	0.59	0.0228	1.87	0.84	0.367
FFA_Palmitic Acid [M-H+Acetate]	531996	-1.45	0.44	0.0228	-0.53	0.67	0.862
Eicosanoid_13,14-dihydro-15-keto-tetranor-PGF1alpha [M-H+Acetate]	129125	-1.6	0.49	0.0245	-1.85	0.45	0.0121
EIC_106	378136	2.39	0.74	0.0249	1.97	0.89	0.367
Novel EIC_6	233564	1.45	0.45	0.0263	0.46	0.43	0.785
EIC_225	261389	1.46	0.46	0.0263	0.89	0.48	0.483
Endocannabinoid_D-erythro-Sphingosine C-18 [M-H+Acetate]	518988	-1.4	0.44	0.0263	-0.84	0.56	0.599
FFA_Myristic Acid [M-H]	524668	-1.55	0.49	0.0295	-0.57	0.56	0.794
Eicosanoid_13,14-dihydro-PGF1a [M-H]	190593	3.43	1.12	0.0367	0.76	0.68	0.762
FFA_Heptadecaenoic Acid [M-H+Acetate]	532124	-2.04	0.67	0.0367	-1.68	0.73	0.357
FFA_Nervonic Acid [M-H]	545847	-1.56	0.51	0.0367	-0.75	0.5	0.592
Docosanoid_7(S),17(S)-hydroxy DPA [M-H+Acetate]	270778	1.72	0.58	0.0414	1.86	0.74	0.357
EIC_184	334912	-1.39	0.46	0.0414	-1.26	0.42	0.2
Putative_1-Palmitoyl-2-hydroxy-sn-glycero-3-phosphoethanolamine	452730	-1.97	0.66	0.044	-1.39	0.7	0.435
Novel EIC_13	423715	1.51	0.51	0.0457	1.38	0.67	0.432
FFA_Myristic Acid [M-H+Acetate]	524395	-1.74	0.59	0.0457	-0.79	0.7	0.762
FFA_Arachidic Acid [M-H]	536380	-2.31	0.78	0.0457	-1.08	0.91	0.757
FFA_Heptadecaenoic Acid [M-H+Acetate]	532672	-1.41	0.48	0.0464	-0.58	0.81	0.905
EIC_31	407392	-1.37	0.47	0.0479	-1.13	0.56	0.433
FAHFA_48	529646	-1.85	0.64	0.0479	-0.91	0.87	0.794
EIC_229	199695	1.08	0.37	0.0481	0.67	0.38	0.516
Novel EIC_6	234484	1.12	0.39	0.0481	0.02	0.37	0.983
EIC_62	269687	1.31	0.46	0.0481	0.5	0.32	0.592
Eicosanoid_Arachidonic Acid [M-H+Acetate]	531873	-2	0.69	0.0481	-1.62	0.78	0.432
EIC_314	153636	1.01	0.35	0.0538	2.2	2.09	0.792
Novel EIC_10	347387	-1.42	0.5	0.0538	-0.07	0.55	0.978
FFA_Stearidonic Acid [M-H]	488156	-2.09	0.74	0.0557	-0.87	0.93	0.811
FFA_Tricosenoic Acid [M-H]	542617	-1.21	0.43	0.0557	-0.91	0.41	0.367
EIC_91	326677	1.63	0.58	0.0581	1.87	0.62	0.193
Eicosanoid_18(+/-)-HETE [M-H+Acetate]	377399	1.16	0.42	0.0587	0.4	0.46	0.828
EIC_189	386159	-1.99	0.72	0.0587	-1.63	0.73	0.367
FAHFA_48	528338	-1.59	0.57	0.059	-0.88	0.6	0.613
Eicosanoid_5,6-diHETrE [M-H]	386644	1.88	0.68	0.0592	1.99	0.87	0.357
FFA_Arachidic Acid [M-H+Acetate]	534912	-1.32	0.48	0.0642	-1.05	0.58	0.495
Eicosanoid_PGF1a [M-H]	167096	1.49	0.55	0.0653	0.04	0.33	0.978
EIC_15	410919	1.81	0.67	0.0653	2.12	0.86	0.357
Eicosanoid_5(S) HETrE [M-H]	501853	-1.04	0.38	0.0653	-0.75	0.46	0.561
FFA_Oleic Acid [M-H]	534665	-1.45	0.54	0.0683	-0.56	0.77	0.896
Bile Acid_Deoxycholic Acid [M-H+Acetate]	346895	1.78	0.66	0.0698	5.28	1.68	0.172
Eicosanoid_13,14-dihydro-PGE1 [M-H]	198449	-1.85	0.7	0.0746	-1.87	0.57	0.137
Eicosanoid_12-HETE [M-H+Acetate]	425444	-1.41	0.53	0.0746	0.1	0.63	0.978
Putative_2-Hydroxypalmitic acid	518068	1.3	0.49	0.0758	1.05	0.58	0.495
Eicosanoid_DHA [M-H+Acetate]	529467	-1.19	0.45	0.0765	-0.9	0.51	0.501
Putative_2-Hydroxypalmitic acid	523924	-1.76	0.67	0.0786	-1.45	0.7	0.432
EIC_111	454288	-1.51	0.58	0.0806	-0.77	0.69	0.762
FAHFA_62	533738	-1.01	0.39	0.0806	-0.08	0.43	0.978
Novel EIC_6	225577	1.2	0.46	0.0815	1.99	0.76	0.302
Novel EIC_3	381111	-1.22	0.47	0.0815	-0.43	0.49	0.828
VLCDCA_1	533929	-1.08	0.42	0.0815	0.24	0.53	0.951
Novel EIC_6	221883	1.12	0.44	0.0822	2.49	1.22	0.432
FFA_Dihomo-g-linolenic [M-H]	530664	-1.01	0.39	0.0822	-0.09	0.56	0.978
Eicosanoid_8-iso-PGA2 [M-H+Acetate]	222096	1	0.39	0.0826	0.42	0.44	0.808
EIC_358	264609	1.11	0.43	0.0826	0.7	0.44	0.585
Eicosanoid_15t-Protectin D1 [M-H+Acetate]	275324	1.37	0.53	0.0826	0.46	0.47	0.794
EIC_58	342155	2.59	1.01	0.0826	2.51	1.1	0.357
EIC_185	397724	1.22	0.47	0.0826	0.17	0.33	0.936
Eicosanoid_Arachidonic Acid [M-H]	529143	-1.14	0.45	0.0826	-1.1	0.52	0.431
Eicosanoid_12S-HpEPE [M-H]	382329	0.92	0.36	0.0834	0.28	0.48	0.932
Eicosanoid_13(S) HOTrE(y) [M-H+Acetate]	377311	-1.55	0.61	0.0859	-0.53	0.75	0.917
FFA_a-linolenic Acid [M-H]	517566	2.47	0.98	0.0872	0.93	0.7	0.697
Putative_Abietic acid	514832	4.33	1.72	0.0876	2	0.76	0.302
FFA_Nervonic Acid [M-H]	539105	1.04	0.42	0.102	0.75	0.41	0.495
Eicosanoid_PGE3 [M-H+Acetate]	148936	-1.05	0.43	0.106	-0.3	0.39	0.871
Novel EIC_44	186232	0.91	0.38	0.11	1.12	0.63	0.501
Eicosanoid_LTB4 ethanol amide [M-H+Acetate]	227844	-1.83	0.76	0.11	-1.48	0.96	0.592
Eicosanoid_tetranor-PGFM [M-H]	29345	1.3	0.54	0.11	1.39	0.59	0.357
FAHFA_27	528052	-1.02	0.42	0.11	-0.15	0.53	0.975
EIC_80	358635	4.16	1.73	0.112	0.78	0.52	0.592
EIC_10	432853	-0.88	0.37	0.115	-0.56	0.4	0.654
Novel EIC_35	134247	-0.93	0.39	0.118	0.62	0.66	0.809
EIC_183	455310	-0.97	0.41	0.118	-0.35	0.41	0.834
FFA_Dihomo-g-linolenic [M-H]	529407	-1.2	0.5	0.118	-0.68	0.64	0.785
Novel EIC_35	136210	-0.75	0.32	0.118	0.27	0.55	0.94
FFA_Heptadecanoic Acid [M-H]	532380	-1.14	0.48	0.118	-0.21	0.66	0.973
EIC_250	199108	-0.91	0.39	0.119	-0.97	0.46	0.432
EIC_124	240491	-1.64	0.7	0.119	-0.74	0.73	0.794
FAHFA_43	529622	-1.23	0.53	0.12	0.3	0.78	0.968
EIC_322	247451	-0.86	0.37	0.121	-1.15	0.43	0.302
EIC_87	387542	1.11	0.47	0.121	1.28	0.45	0.263
Putative_Monolinolenin (9c,12c,15c)	341483	0.67	0.29	0.121	-0.02	0.32	0.982
EIC_150	301803	0.74	0.32	0.122	0.6	0.37	0.582
EIC_189	389030	1.1	0.47	0.122	0.82	0.59	0.654
FFA_Palmitoleic Acid [M-H+Acetate]	529152	-1.21	0.52	0.122	-0.27	0.6	0.957
Eicosanoid_PGE3 [M-H+Acetate]	145653	-1.07	0.46	0.123	0.03	0.53	0.982
FFA_Palmitic Acid [M-H+Acetate]	534889	-1.49	0.65	0.123	-0.59	0.77	0.885
FFA_Arachidic Acid [M-H]	541489	-0.96	0.42	0.123	0.11	0.5	0.978
FFA_Palmitoleic Acid [M-H]	529701	-0.91	0.4	0.127	-1.08	0.48	0.357
Eicosanoid_15 oxoEDE [M-H+Acetate]	474392	-1.17	0.52	0.132	-0.15	0.64	0.978
Polar Molecule_N-ACETYLTRYPTOPHAN [M-H+Acetate]	49032	1.95	0.86	0.132	0.25	0.74	0.968
FFA_Oleic Acid [M-H+Acetate]	531868	-1.32	0.58	0.132	-0.84	0.66	0.727
FFA_Stearic Acid [M-H+Acetate]	534421	-1.41	0.63	0.132	-0.29	0.8	0.968
FFA_Docosadienoic Acid [M-H]	534554	-1.48	0.66	0.132	-0.68	0.77	0.828
EIC_138	199063	0.9	0.4	0.133	0.34	0.4	0.838
Bile Acid_Ursodeoxycholic acid [M-H+Acetate]	232137	-1.6	0.72	0.133	-1.26	0.88	0.627
EIC_22	406441	-0.93	0.41	0.133	0.11	0.59	0.978
Eicosanoid_Adrenic Acid [M-H]	532126	-1.06	0.47	0.133	-0.52	0.62	0.844
FFA_Stearic Acid [M-H]	533317	-1.38	0.62	0.137	-1.59	0.62	0.349
EIC_146	239745	0.74	0.34	0.138	0.24	0.32	0.885
EIC_143	315302	0.81	0.37	0.138	0.07	0.36	0.978
Eicosanoid_18(+/-)-HETE [M-H+Acetate]	374735	1.16	0.52	0.138	2.53	1.5	0.529
FFA_a-linolenic Acid [M-H]	527674	-1.05	0.47	0.138	-0.16	0.6	0.978
FFA_Oleic Acid [M-H]	531847	-1.31	0.59	0.138	-0.93	0.64	0.627
Bile Acid_Glycoursodeoxycholic Acid [M-H+Acetate]	181294	1.19	0.54	0.142	0.03	0.42	0.982
FFA_Eicosadienoic Acid [M-H]	531992	-0.96	0.44	0.142	-0.43	0.49	0.828
Eicosanoid_14,15-DiHETE [M-H+Acetate]	298878	-1.02	0.47	0.142	-0.19	0.5	0.968
Eicosanoid_EPA [M-H]	523009	0.82	0.38	0.142	-0.21	0.4	0.932
Putative_Levofloxacin	36118	-0.93	0.43	0.142	-0.52	0.5	0.794
EIC_71	305288	-1.05	0.48	0.149	0.53	0.79	0.92
Polar Molecule_GLYCOCHOLATE [M-H]	170444	1.83	0.85	0.151	0.74	0.39	0.483
FFA_Stearic Acid [M-H+Acetate]	533106	-0.95	0.44	0.151	-0.05	0.54	0.982
Sterol_11-Deoxycorticosterone [M-H+Acetate]	228510	0.84	0.39	0.153	0.03	0.46	0.982
EIC_156	264493	0.72	0.33	0.153	0.57	0.47	0.752
Putative_D-erythro-Sphingosine-1-phosphate	377404	1.06	0.49	0.153	0.43	0.44	0.794
Bile Acid_Glycoursodeoxycholic Acid [M-H]	166774	1.2	0.57	0.155	0.63	0.53	0.756
FAHFA_29	529339	-0.89	0.42	0.155	0.19	0.56	0.968
FFA_Heptadecaenoic Acid [M-H]	531845	-0.74	0.35	0.155	0.14	0.55	0.978
Eicosanoid_14(15) EpETE [M-H]	408497	0.68	0.32	0.157	0.16	0.36	0.949
Bile Acid_Ursodeoxycholic acid [M-H]	232041	-1.62	0.77	0.158	-0.97	0.94	0.794
Eicosanoid_5,6-EET [M-H]	469222	-0.9	0.43	0.158	-0.48	0.44	0.77
FFA_Tricosenoic Acid [M-H+Acetate]	537869	0.88	0.42	0.158	0.22	0.37	0.932
Eicosanoid_15-epi-PGA1 [M-H+Acetate]	260175	-1.35	0.64	0.159	-1.4	0.59	0.357
EIC_23	437680	-1.03	0.49	0.167	0.01	0.46	0.996
Putative_Tauroursodeoxycholic acid	181279	1.48	0.71	0.168	1.87	0.94	0.435
Eicosanoid_EPA [M-H+Acetate]	523035	0.79	0.38	0.168	-0.31	0.43	0.896
EIC_177	274066	1.62	0.79	0.17	0.14	0.47	0.974
Eicosanoid_11-dehydro-2,3-dinor-TXB2 [M-H+Acetate]	132844	-0.72	0.35	0.173	0.33	0.45	0.89
EIC_83	344675	0.7	0.34	0.176	0.54	0.35	0.592
EIC_101	433368	-0.99	0.49	0.182	-0.36	0.49	0.893
EIC_263	204232	0.74	0.37	0.183	1.1	0.48	0.357
Eicosanoid_11-HETE [M-H+Acetate]	423143	-1.03	0.51	0.183	0.17	0.55	0.974
VLCDCA_28	544581	0.87	0.43	0.184	0.58	0.42	0.654
FFA_Linoleic Acid [M-H+Acetate]	528408	-1.85	0.92	0.185	-1.5	0.95	0.582
Putative_N-Oleoyl-L-serine	517674	-0.92	0.46	0.189	-0.33	0.57	0.932
EIC_137	217947	0.67	0.34	0.191	0.97	0.58	0.529
Polar Molecule_CORTISONE [M-H+Acetate]	118213	-1.06	0.54	0.196	0.06	0.53	0.979
Eicosanoid_tetranor-PGFM [M-H]	31459	1.31	0.66	0.197	1.26	0.75	0.529
EIC_329	263763	-0.79	0.4	0.2	-0.28	0.5	0.932
EIC_205	208847	0.75	0.38	0.203	0.48	0.36	0.703
Bile Acid_Glycochenodeoxycholic Acid [M-H]	251495	4.55	2.33	0.203	1.8	0.76	0.357
Eicosanoid_11(12)-EpETE [M-H]	416960	0.7	0.36	0.203	-0.21	0.35	0.932
Putative_Codeine-6-b-D-glucuronide	111091	1.8	0.93	0.209	0.47	0.47	0.794
EIC_250	191117	0.82	0.43	0.213	-0.06	0.45	0.978
Putative_1,3,5(10)-Estratrien-3,17b-diol 17-glucosiduronate	271516	1.11	0.59	0.213	0.96	0.57	0.529
EIC_91	329577	0.7	0.37	0.213	0.24	0.42	0.932
Novel EIC_3	375923	1.57	0.82	0.213	1.19	0.76	0.582
Endocannabinoid_Arachidonoyl Ethanolamide [M-H+Acetate]	479677	-0.66	0.35	0.213	-0.2	0.55	0.968
FFA_a-linolenic Acid [M-H]	521670	-0.96	0.5	0.213	-0.24	0.71	0.968
FAHFA_13	525986	-1	0.52	0.213	0.27	0.96	0.974
FAHFA_39	528335	-0.99	0.51	0.213	-0.75	0.56	0.685
VLCDCA_1	531095	0.86	0.45	0.213	1.23	0.7	0.504
FFA_Eicosenoic Acid [M-H]	539066	-0.94	0.5	0.213	-0.76	0.52	0.614
Putative_N-oleoyl taurine	497820	-0.77	0.41	0.217	-0.42	0.47	0.826
Eicosanoid_14,15 LTC4 [M-H]	264928	1.19	0.63	0.218	-0.09	0.59	0.978
Eicosanoid_15-epi-PGA1 [M-H+Acetate]	248240	0.96	0.51	0.22	0.66	0.58	0.762
EIC_79	252002	0.72	0.39	0.22	0.34	0.35	0.794
FFA_Eicosenoic Acid [M-H]	534395	-1.04	0.55	0.22	-0.56	0.62	0.822
EIC_189	381176	-0.91	0.49	0.221	-0.41	0.51	0.849
Eicosanoid_7,17 dhDPA [M-H+Acetate]	286064	0.6	0.32	0.221	0.73	0.31	0.357
Bile Acid_Chenodeoxycholic acid [M-H]	335887	2.26	1.21	0.221	7.44	3.64	0.432
Bile Acid_Chenodeoxycholic acid [M-H+Acetate]	335959	2.24	1.21	0.221	7.16	3.51	0.432
Eicosanoid_8,9-diHETrE [M-H]	357813	-0.9	0.48	0.221	-0.74	0.51	0.627
Putative_2-Hydroxypalmitic acid	525710	-0.7	0.38	0.221	0.2	0.48	0.964
FFA_Arachidic Acid [M-H]	535084	-0.94	0.5	0.221	-0.69	0.7	0.794
VLCDCA_14	540389	-0.98	0.53	0.221	0.41	0.68	0.932
EIC_124	238208	-0.83	0.45	0.222	0.6	0.4	0.592
Eicosanoid_15-epi-PGA1 [M-H+Acetate]	253524	0.75	0.41	0.226	0.09	0.34	0.978
FAHFA_71	537708	-0.66	0.36	0.226	0.05	0.5	0.982
FFA_Oleic Acid [M-H]	530347	-0.99	0.54	0.23	-0.61	0.56	0.77
FFA_Palmitic Acid [M-H+Acetate]	531306	-1.07	0.59	0.23	-0.68	0.66	0.794
Eicosanoid_tetranor 12(R) HETE [M-H+Acetate]	320002	-1.11	0.61	0.231	-1.16	0.6	0.447
FFA_Oleic Acid [M-H]	535786	-0.85	0.47	0.231	-0.29	0.57	0.932
Polar Molecule_GLYCOCHOLATE [M-H]	172623	1.81	1	0.232	0.74	0.42	0.501
EIC_135	316724	0.57	0.32	0.233	1.2	0.53	0.36
EIC_250	195182	0.7	0.39	0.233	0.09	0.44	0.978
EIC_121	298758	1.03	0.57	0.233	2.55	1.21	0.432
FAHFA_42	531450	-0.95	0.52	0.233	0.2	0.58	0.968
Putative_6-((E)-2-((1R,2S,3R,5S)-3,5-Dihydroxy-2-((Z)-oct-2-enyl)cyclopentyl)vinyl)tetrahydro-2H-pyran-2-one	167035	1.05	0.59	0.233	0.31	0.36	0.834
Putative_Androsterone glucuronide	170446	1.21	0.67	0.233	0.94	0.41	0.357
Putative_Androsterone glucuronide	172624	2.06	1.14	0.233	0.51	0.44	0.762
EIC_205	221256	0.63	0.35	0.233	0.75	0.4	0.492
Eicosanoid_15S-HpETE [M-H]	413128	-0.61	0.34	0.233	0.45	0.46	0.794
VLCDCA_1	534965	-1.63	0.91	0.233	-1.08	0.89	0.752
Bile Acid_Deoxycholic Acid [M-H+Acetate]	353332	1.37	0.77	0.234	2.63	1.33	0.435
Eicosanoid_13(S) HOTrE [M-H+Acetate]	365619	-0.99	0.56	0.234	0.03	0.77	0.986
FAHFA_14	522914	1	0.56	0.234	-0.17	0.46	0.968
FFA_Docosatrienoic Acid [M-H]	532415	-0.9	0.5	0.234	-0.49	0.55	0.828
Eicosanoid_15k PGF2a [M-H+Acetate]	109511	-0.66	0.37	0.234	-0.59	0.49	0.752
Putative_N-Oleoyl-L-serine	522459	0.85	0.48	0.234	1.28	0.71	0.495
FAHFA_37	528301	-0.87	0.49	0.234	-0.44	0.47	0.811
EIC_139	211121	0.87	0.49	0.236	1.57	0.58	0.286
VLCDCA_6	535897	-0.85	0.48	0.236	0.15	0.52	0.974
Eicosanoid_13,14-dihydro-PGE1 [M-H]	195187	0.81	0.46	0.242	0.11	0.54	0.978
EIC_71	312209	-0.91	0.52	0.242	-0.3	0.52	0.932
EIC_17	404135	-0.9	0.51	0.242	-0.12	0.59	0.978
Eicosanoid_19(R)-HETE [M-H]	367701	-0.68	0.39	0.242	0.06	0.39	0.978
Eicosanoid_8,9-diHETrE [M-H+Acetate]	365688	-1.29	0.74	0.246	-0.67	0.77	0.828
EIC_62	256944	-1.23	0.72	0.253	-0.58	0.77	0.89
Bile Acid_Glycochenodeoxycholic Acid [M-H]	255997	1.96	1.14	0.256	1.83	0.81	0.357
FFA_Stearidonic Acid [M-H+Acetate]	487076	-1.04	0.62	0.27	1.57	1.41	0.762
FFA_Eicosenoic Acid [M-H]	533336	1.19	0.7	0.271	-0.09	0.52	0.978
Polar Molecule_MYRISTATE [M-H]	519152	0.84	0.5	0.271	0.33	0.51	0.929
Bile Acid_Deoxycholic Acid [M-H]	353270	1.24	0.74	0.276	2.52	1.25	0.433
EIC_318	136905	0.5	0.3	0.285	0.42	0.37	0.762
Bile Acid_Glycochenodeoxycholic Acid [M-H]	247605	1.23	0.74	0.286	1.36	0.73	0.492
Putative_2-Hydroxypalmitic acid	521349	-0.67	0.41	0.286	-0.86	0.44	0.435
Bile Acid_b-Muricholic Acid [M-H]	235527	2.94	1.79	0.288	6.97	3.6	0.456
FFA_Oleic Acid [M-H+Acetate]	532675	-0.96	0.58	0.288	-0.18	0.7	0.978
Putative_Codeine-6-b-D-glucuronide	119896	1.48	0.91	0.292	0.44	0.48	0.816
Bile Acid_b-Muricholic Acid [M-H+Acetate]	235588	2.9	1.78	0.292	6.46	3.55	0.495
Putative_Chenodeoxycholic acid 24-acyl-b-D-glucuronide	242299	1.48	0.91	0.292	1.38	0.6	0.357
EIC_4	345300	0.55	0.34	0.292	0.58	0.57	0.794
Novel EIC_18	420737	0.71	0.43	0.292	0.45	0.37	0.756
Polar Molecule_PALMITOLEATE [M-H]	521338	-0.8	0.49	0.292	-0.98	0.65	0.592
Eicosanoid_LTF4 [M-H]	266556	1.23	0.76	0.294	0.09	0.45	0.978
Eicosanoid_11t LTE4 [M-H+Acetate]	275412	-0.84	0.52	0.295	-0.95	0.52	0.495
EIC_338	297072	-0.7	0.44	0.295	-1.03	0.54	0.468
Eicosanoid_13-oxoODE [M-H+Acetate]	408537	-0.86	0.54	0.295	0.26	0.73	0.968
FFA_a-linolenic Acid [M-H]	523928	-0.63	0.39	0.295	0.31	0.51	0.932
Novel EIC_5	373373	-0.57	0.36	0.298	0.22	0.42	0.932
EIC_322	266179	0.58	0.37	0.302	0.9	0.34	0.302
EIC_10	440807	2.83	1.79	0.307	0.77	0.52	0.612
Bile Acid_Glycochenodeoxycholic Acid [M-H]	237311	0.9	0.57	0.308	0.49	0.39	0.734
EIC_146	251251	1.11	0.7	0.31	0.8	0.45	0.501
EIC_177	262111	0.6	0.38	0.31	0.87	0.43	0.433
Novel EIC_28	457606	0.9	0.57	0.31	0.13	0.42	0.974
Novel EIC_40	183709	0.61	0.39	0.313	0.44	0.48	0.816
FAHFA_57	531915	-2.08	1.33	0.313	-1.51	1.42	0.786
FFA_Docosadienoic Acid [M-H]	536158	-1.16	0.75	0.313	-1.32	0.72	0.492
EIC_260	267578	-0.48	0.31	0.319	-0.14	0.5	0.975
FFA_Linoleic Acid [M-H]	528366	-0.62	0.4	0.319	-0.31	0.42	0.893
Polar Molecule_GAMMA-LINOLENATE [M-H]	516521	0.66	0.43	0.32	0.58	0.5	0.762
VLCDCA_42	540422	-0.78	0.51	0.32	-0.44	0.54	0.849
FAHFA_27	531614	-1.3	0.84	0.321	-0.49	0.93	0.932
Docosanoid_7-epi-Maresin 1 [M-H+Acetate]	254854	5.57	3.63	0.322	1.11	1.42	0.872
Putative_Dodecylbenzenesulfonic acid	403895	0.79	0.52	0.323	0.41	0.71	0.932
VLCDCA_2	534195	-0.78	0.51	0.323	0.1	0.52	0.978
FAHFA_11	520688	-0.73	0.48	0.327	0.33	0.67	0.94
FFA_Linoleic Acid [M-H]	532109	-0.66	0.43	0.327	0.18	0.64	0.974
Eicosanoid_15 oxoEDE [M-H]	479072	-0.61	0.4	0.33	-0.37	0.47	0.864
Eicosanoid_PGF1a [M-H]	164760	0.66	0.44	0.335	0.08	0.48	0.978
Putative_1-Arachidoyl-2-hydroxy-sn-glycero-3-phosphocholine	525258	-0.63	0.42	0.335	-0.1	0.56	0.978
EIC_137	228394	0.55	0.37	0.338	0.27	0.42	0.929
Putative_Chenodeoxycholic acid 24-acyl-b-D-glucuronide	232936	1.12	0.75	0.338	0.77	0.57	0.665
EIC_1	310243	-0.97	0.65	0.338	0.73	1.32	0.932
EIC_303	328235	-0.67	0.45	0.338	0.23	0.62	0.968
Putative_1-Oleoyl-sn-glycero-3-phosphoethanolamine	463104	0.82	0.55	0.338	0.44	0.38	0.762
EIC_80	365075	-1.01	0.68	0.338	-0.38	0.74	0.932
Eicosanoid_13S-HpOTrE [M-H]	370062	0.76	0.51	0.338	0.49	0.47	0.794
FAHFA_58	531777	-1.84	1.24	0.339	-0.81	1.45	0.932
FFA_a-linolenic Acid [M-H+Acetate]	520570	-0.74	0.5	0.345	-0.17	0.53	0.974
Eicosanoid_13,14-dihydro-PGE1 [M-H]	189965	1.06	0.72	0.345	0.89	0.49	0.495
FFA_Pentadecanoic Acid [M-H]	530326	-0.57	0.39	0.349	0.02	0.66	0.989
EIC_178	254050	5.52	3.81	0.356	2.34	1.8	0.711
FFA_Adrenic Acid [M-H]	528116	-0.72	0.5	0.356	-0.5	0.44	0.762
Putative_Glycocholic acid	179340	1.13	0.79	0.359	0.3	0.41	0.893
EIC_55	297605	-0.69	0.48	0.36	-0.2	0.66	0.974
EIC_146	245286	1.33	0.93	0.36	0.55	0.54	0.794
EIC_178	245971	2.14	1.49	0.361	1.97	1.11	0.501
FFA_Palmitoleic Acid [M-H]	531843	-0.68	0.48	0.361	-0.58	0.53	0.77
FAHFA_11	521853	-0.94	0.66	0.364	0.41	1.05	0.968
Putative_Oxymorphone 3-b-D-glucuronide	90626	2.13	1.5	0.365	0.2	0.59	0.968
FAHFA_76	545467	-0.67	0.47	0.366	0.17	0.51	0.968
EIC_71	298732	-0.67	0.48	0.366	-0.02	0.5	0.986
Putative_Dodecylbenzenesulfonic acid	399899	0.91	0.64	0.368	1.26	0.8	0.582
EIC_6	357386	-0.57	0.41	0.371	-0.05	0.54	0.982
FFA_Palmitic Acid [M-H]	533569	-0.47	0.34	0.374	0.33	0.47	0.917
EIC_125	198399	-1.29	0.93	0.378	0.18	1.12	0.978
Eicosanoid_11,12-diHETrE [M-H+Acetate]	350152	-1.12	0.81	0.378	-0.7	0.81	0.834
Eicosanoid_9-oxoOTrE [M-H+Acetate]	368320	-0.76	0.56	0.385	1.04	0.84	0.745
EIC_33	446442	-0.84	0.61	0.387	2.08	1.29	0.579
Novel EIC_9	424299	0.61	0.45	0.39	0.71	0.56	0.73
Eicosanoid_15S-HpETE [M-H]	407687	-0.65	0.48	0.392	-0.8	0.52	0.592
Docosanoid_osbond acid, all-cis-4,7,10,13,16-DPA [M-H]	528114	-0.62	0.45	0.392	-0.76	0.4	0.457
EIC_257	249793	0.55	0.4	0.393	0.45	0.54	0.84
EIC_135	321522	0.53	0.39	0.393	0.6	0.45	0.675
Endocannabinoid_2-Arachidonyl glycerol ether [M-H+Acetate]	526318	-1.14	0.85	0.393	-0.12	0.91	0.978
Polar Molecule_LIOTHYRONINE [M-H]	116699	-0.73	0.54	0.396	-0.48	0.48	0.794
FFA_Linoleic Acid [M-H+Acetate]	526555	-2.13	1.58	0.396	-1.09	1.6	0.92
Docosanoid_Resolvin E1 [M-H+Acetate]	110221	-0.53	0.4	0.409	-0.22	0.37	0.932
EIC_1	325888	-0.69	0.52	0.409	0.72	0.79	0.822
FAHFA_69	545400	-1.17	0.89	0.413	-0.71	0.92	0.881
Putative_PGPC	447166	3.2	2.45	0.417	-0.14	0.71	0.978
EIC_31	411585	-0.55	0.42	0.418	0.67	0.68	0.794
EIC_303	338181	0.59	0.46	0.419	0.59	0.53	0.765
Eicosanoid_14,15-EET [M-H+Acetate]	444412	0.78	0.6	0.419	2.69	1.18	0.357
FFA_a-linolenic Acid [M-H]	520524	-0.57	0.44	0.424	-0.01	0.5	0.996
Eicosanoid_5,6-diHETrE [M-H]	390693	1.19	0.94	0.438	0.53	0.61	0.828
VLCDCA_17	532189	-1.02	0.81	0.443	-0.12	0.89	0.978
EIC_166	353621	0.89	0.71	0.444	-0.04	0.51	0.982
EIC_16	399201	-0.61	0.48	0.444	-0.08	0.48	0.978
VLCDCA_2	533159	-0.75	0.59	0.444	-0.67	0.6	0.762
EIC_69	413523	-0.56	0.45	0.446	0.26	0.52	0.937
Polar Molecule_LUMICHROME [M-H]	63608	-1.09	0.87	0.446	-1.72	0.75	0.357
Novel EIC_33	460414	1.01	0.82	0.452	-0.19	0.66	0.974
EIC_229	193228	0.47	0.39	0.46	0.23	0.44	0.932
EIC_88	373969	0.8	0.65	0.464	0.37	0.62	0.932
VLCDCA_44	547731	-0.69	0.57	0.464	-0.21	0.58	0.968
EIC_83	335777	0.93	0.76	0.466	1.85	1.16	0.582
EIC_181	341438	-0.45	0.37	0.466	0.11	0.67	0.978
EIC_15	409677	-0.68	0.56	0.467	1.48	0.89	0.541
Eicosanoid_17,18-DiHETE [M-H+Acetate]	268636	0.51	0.42	0.468	0.53	0.52	0.794
Putative_11a-Hydroxyprogesterone b-D-glucuronide	269360	0.55	0.45	0.469	1.25	0.94	0.691
Polar Molecule_ELAIDATE [M-H]	527169	-2.74	2.29	0.475	-0.08	2.98	0.992
EIC_343	395749	-0.66	0.56	0.48	1.47	1.02	0.627
Eicosanoid_13,14-dihydro-15-keto-tetranor-PGD2 [M-H+Acetate]	125018	0.58	0.49	0.485	0.26	0.47	0.932
EIC_156	253384	0.45	0.38	0.485	0.26	0.4	0.928
EIC_225	266128	0.72	0.61	0.485	-0.22	0.58	0.968
Eicosanoid_15(S) HEPE [M-H+Acetate]	371287	-0.64	0.54	0.485	0.47	0.9	0.932
Eicosanoid_10-Nitrooleate [M-H]	510123	-0.47	0.4	0.485	-0.39	0.36	0.765
EIC_333	191164	-0.6	0.51	0.486	-0.49	0.58	0.835
EIC_58	348012	4.1	3.52	0.49	1.73	1.16	0.609
Novel EIC_9	422540	0.55	0.48	0.493	1.34	0.61	0.367
EIC_354	155807	-0.66	0.57	0.495	0.44	0.8	0.932
Polar Molecule_NERVONATE [M-H]	537448	-0.83	0.72	0.499	-0.95	0.72	0.703
Bile Acid_Tauroursodeoxycholic acid [M-H]	164435	-1.06	0.93	0.501	-1.02	0.9	0.762
Putative_Monolinolenin (9c,12c,15c)	343482	0.48	0.43	0.505	-0.04	0.4	0.979
EIC_271	281689	-0.8	0.71	0.508	-1.5	0.65	0.357
FAHFA_21	526086	-0.56	0.5	0.508	0.12	0.53	0.978
Polar Molecule_PALMITATE [M-H+Acetate]	527462	-1.21	1.08	0.513	-0.57	1.05	0.932
FFA_Docosaenoic Acid [M-H]	537429	-0.45	0.4	0.513	0.24	0.58	0.964
Putative_5a-Androstan-17b-ol-3-one glucosiduronate	201784	1.24	1.12	0.519	-0.04	0.48	0.982
EIC_51	330923	-0.86	0.77	0.519	-0.2	0.81	0.978
EIC_20	393655	-0.53	0.48	0.519	0.94	0.82	0.762
Polar Molecule_GAMMA-LINOLENATE [M-H+Acetate]	518129	-3.55	3.2	0.519	-4.11	3.19	0.721
Endocannabinoid_N-arachidonoyl Dopamine [M-H]	515028	-0.69	0.63	0.527	-0.43	0.72	0.932
FAHFA_15	527360	0.64	0.58	0.528	0.29	0.57	0.936
VLCDCA_44	544161	-0.67	0.61	0.528	-0.1	0.67	0.978
Bile Acid_Lithocholic Acid [M-H+Acetate]	441749	0.69	0.63	0.529	0.82	0.69	0.756
EIC_229	184258	0.44	0.41	0.534	0.11	0.37	0.974
FAHFA_47	529594	-0.44	0.41	0.534	-0.09	0.51	0.978
Eicosanoid_14,15-diHETrE [M-H+Acetate]	323938	1.46	1.36	0.535	0.83	1.14	0.893
FAHFA_69	542169	-0.53	0.49	0.535	-0.03	0.51	0.982
VLCDCA_34	544601	-0.38	0.35	0.535	0.68	0.36	0.492
EIC_157	292929	0.58	0.54	0.535	0.69	0.54	0.727
Polar Molecule_BIOTIN [M-H]	31198	0.45	0.42	0.535	1.01	0.66	0.592
VLCDCA_12	535370	-0.46	0.43	0.535	-0.05	0.6	0.982
EIC_125	185482	0.44	0.41	0.537	0.96	0.7	0.654
FFA_Eicosenoic Acid [M-H]	531994	-0.54	0.51	0.537	0.65	0.67	0.799
VLCDCA_6	534200	-0.53	0.5	0.537	-0.17	0.47	0.968
EIC_15	406050	-0.59	0.56	0.538	-0.08	0.51	0.978
EIC_271	297019	-0.47	0.45	0.538	-0.13	0.63	0.978
Polar Molecule_PALMITATE [M-H+Acetate]	529748	0.38	0.36	0.538	0.98	0.49	0.434
FAHFA_69	541292	-0.5	0.48	0.538	-0.11	0.5	0.978
Eicosanoid_13,14-dihydro-PGE1 [M-H]	185541	0.5	0.47	0.54	0.07	0.44	0.978
Putative_1-Stearoyl-2-hydroxy-sn-glycero-3-phosphoethanolamine	521802	-0.45	0.43	0.54	-0.22	0.45	0.941
EIC_87	390659	0.56	0.54	0.541	0.29	0.44	0.922
VLCDCA_38	530224	0.55	0.53	0.541	0.63	0.56	0.762
VLCDCA_28	542127	-0.46	0.45	0.541	-0.22	0.44	0.937
FFA_Palmitoleic Acid [M-H+Acetate]	523988	-0.5	0.49	0.546	0.58	0.59	0.794
Putative_Chenodeoxycholic acid 24-acyl-b-D-glucuronide	236149	0.55	0.53	0.547	0.49	0.52	0.809
Polar Molecule_THYMIDINE-MONOPHOSPHATE [M-H+Acetate]	35550	-0.51	0.5	0.549	0.82	0.7	0.762
Docosanoid_7,8-DiHDPA [M-H+Acetate]	364346	0.65	0.64	0.553	0.06	0.57	0.982
Putative_Androsterone glucuronide	179343	0.85	0.84	0.554	-0.24	0.32	0.893
Polar Molecule_NERVONATE [M-H+Acetate]	536198	-0.42	0.41	0.556	0.22	0.47	0.948
EIC_147	293675	0.86	0.86	0.565	0.51	0.77	0.924
EIC_69	419015	-1.09	1.09	0.565	-1.39	1.06	0.707
VLCDCA_15	533973	-0.58	0.59	0.565	-0.34	0.59	0.932
Eicosanoid_13,14-dihydro-15-keto-tetranor-PGF1alpha [M-H+Acetate]	125021	-0.51	0.52	0.565	-0.61	0.44	0.654
Polar Molecule_Tetrahydrocortisol [M-H+Acetate]	138195	-0.43	0.44	0.565	0.17	0.51	0.969
Eicosanoid_5S-HpEPE [M-H+Acetate]	402588	-0.51	0.52	0.565	0.11	0.6	0.978
Eicosanoid_DHA [M-H]	529758	-0.43	0.44	0.565	-0.09	0.52	0.978
EIC_185	397318	0.53	0.54	0.569	0.25	0.38	0.92
EIC_110	433852	-0.51	0.53	0.581	-0.37	0.57	0.928
FAHFA_59	532202	-0.44	0.46	0.583	0.61	0.53	0.762
FFA_Pentadecanoic Acid [M-H]	527657	-0.49	0.51	0.584	-0.07	0.61	0.979
Eicosanoid_14,15 LTE4 [M-H]	233290	0.4	0.42	0.588	0.01	0.4	0.992
Eicosanoid_13-oxoODE [M-H+Acetate]	402537	-0.45	0.47	0.588	0.09	0.51	0.978
EIC_104	401285	0.75	0.79	0.59	-0.2	0.52	0.968
Eicosanoid_Adrenic Acid [M-H]	530967	-0.45	0.48	0.59	-0.16	0.49	0.973
VLCDCA_8	532895	0.38	0.4	0.59	0.72	0.38	0.483
FFA_Arachidic Acid [M-H+Acetate]	537842	-0.47	0.5	0.59	-0.3	0.56	0.932
EIC_189	392686	-0.44	0.47	0.591	-0.6	0.44	0.654
VLCDCA_42	544630	-0.47	0.5	0.593	0.03	0.56	0.982
EIC_125	190567	-0.44	0.48	0.603	-0.08	0.57	0.978
EIC_158	232601	-0.51	0.56	0.603	-0.04	0.74	0.982
Bile Acid_Ursodeoxycholic acid [M-H+Acetate]	237318	0.5	0.55	0.603	1.24	0.87	0.634
Bile Acid_Ursodeoxycholic acid [M-H+Acetate]	244872	0.57	0.63	0.603	1.29	0.73	0.501
Eicosanoid_15d PGJ2 [M-H]	364658	0.46	0.51	0.603	-0.76	0.66	0.762
FFA_Stearidonic Acid [M-H]	481336	-0.57	0.63	0.603	-0.26	0.71	0.968
FFA_Heptadecaenoic Acid [M-H]	529369	-0.41	0.45	0.603	-0.17	0.45	0.968
VLCDCA_26	539195	-0.44	0.49	0.603	0.25	0.5	0.939
Polar Molecule_allo-Tetrahydrocortisol [M-H+Acetate]	84478	-0.44	0.48	0.603	-0.04	0.66	0.982
Eicosanoid_9(S) HOTrE [M-H]	353929	-0.36	0.4	0.604	0.03	0.48	0.982
Eicosanoid_11,12-diHETrE [M-H]	355943	-0.38	0.42	0.604	-0.35	0.41	0.837
EIC_9	408763	-0.57	0.64	0.606	0.2	0.78	0.978
EIC_105	382736	-0.4	0.45	0.608	-0.27	0.44	0.932
EIC_14	387514	0.53	0.6	0.608	1.21	0.59	0.432
Eicosanoid_13(S) HOTrE(y) [M-H]	373917	0.49	0.56	0.62	1.45	0.72	0.433
EIC_182	323049	0.81	0.92	0.622	0.04	0.64	0.982
FAHFA_12	520493	-0.35	0.4	0.628	-0.36	0.46	0.864
EIC_47	197702	-0.45	0.53	0.629	-0.22	0.53	0.964
FFA_Tricosanoic Acid [M-H]	542623	0.33	0.39	0.631	0.37	0.39	0.808
FFA_Eicosadienoic Acid [M-H+Acetate]	531329	-1.39	1.63	0.634	-1.79	1.62	0.765
EIC_111	443405	-0.49	0.57	0.64	-0.57	0.55	0.794
VLCDCA_34	537603	-0.35	0.42	0.642	0.09	0.46	0.978
EIC_194	407696	0.5	0.59	0.643	0.1	0.66	0.978
Eicosanoid_5S-HpEPE [M-H]	400564	0.4	0.49	0.649	0.27	0.41	0.928
VLCDCA_41	540711	-0.51	0.62	0.649	-0.39	0.64	0.932
Polar Molecule_STEARATE [M-H]	530351	-0.36	0.44	0.651	0.36	0.37	0.795
Docosanoid_7(S),17(S)-hydroxy DPA [M-H+Acetate]	263855	-0.35	0.43	0.651	0.62	0.48	0.727
FAHFA_28	527378	-0.49	0.6	0.651	-0.49	0.6	0.849
VLCDCA_10	534972	-0.47	0.58	0.651	-0.22	0.57	0.968
Putative_2a-Methyl-5a-androstan-3a-ol-17-one glucuronide	92507	0.61	0.74	0.651	0.09	0.56	0.978
Putative_1a-Methyl-5a-androstan-3a,17b-diol glucuronide	108971	-0.33	0.41	0.656	0.22	0.62	0.968
Eicosanoid_13,14-dihydro-15-keto-PGE1 [M-H]	215016	1.73	2.14	0.656	-0.97	1.05	0.816
Eicosanoid_15-epi-PGA1 [M-H+Acetate]	244131	-0.41	0.5	0.656	-0.23	0.55	0.964
EIC_251	291460	-2.83	3.52	0.656	-2.23	3.52	0.932
Eicosanoid_DHA [M-H]	525743	-0.41	0.51	0.656	0	0.61	0.999
FFA_Tricosenoic Acid [M-H]	541791	-0.33	0.41	0.656	0.08	0.38	0.978
Docosanoid_MCTR2 [M-H]	208505	0.46	0.58	0.66	-0.2	0.66	0.974
Bile Acid_Ursodeoxycholic acid [M-H]	237244	0.47	0.59	0.66	1.11	0.91	0.752
Docosanoid_7(S),17(S)-hydroxy DPA [M-H+Acetate]	283207	0.48	0.6	0.66	0.44	0.6	0.893
VLCDCA_8	534206	-0.38	0.48	0.66	0.19	0.5	0.968
VLCDCA_14	537555	-0.45	0.56	0.66	0.07	0.49	0.978
EIC_138	201561	0.41	0.53	0.662	0.3	0.57	0.932
Sterol_11-keto-testosterone [M-H+Acetate]	157340	0.41	0.53	0.663	0.73	0.59	0.745
EIC_63	392256	0.78	1	0.663	0.47	1.21	0.968
EIC_82	445680	-0.33	0.42	0.663	0.22	0.45	0.939
Polar Molecule_OLEOYL-GLYCEROL [M-H+Acetate]	527254	0.54	0.69	0.663	-0.25	0.73	0.968
Endocannabinoid_Stearoyl Ethanolamide [M-H+Acetate]	530121	-0.39	0.5	0.663	-0.06	0.45	0.979
EIC_95	408174	-0.34	0.44	0.663	0.28	0.57	0.939
VLCDCA_7	539773	-0.48	0.63	0.665	0.13	0.59	0.978
VLCDCA_11	534221	-0.36	0.48	0.671	-0.07	0.43	0.978
EIC_52	240462	0.31	0.41	0.673	0.38	0.36	0.794
Eicosanoid_14,15 LTD4 [M-H+Acetate]	258994	-0.42	0.55	0.673	-0.17	0.8	0.978
Eicosanoid_tetranor 12(R) HETE [M-H]	322224	0.34	0.45	0.673	0.9	0.64	0.646
EIC_185	398537	0.34	0.45	0.673	-0.06	0.36	0.978
Endocannabinoid_N-arachidonoyl Dopamine [M-H+Acetate]	518573	0.36	0.48	0.673	-0.18	0.48	0.968
Eicosanoid_11-dehydro-2,3-dinor-TXB2 [M-H+Acetate]	136286	-0.34	0.45	0.674	0.41	0.49	0.838
FFA_Myristic Acid [M-H]	522346	-0.44	0.58	0.674	-0.23	0.55	0.964
Eicosanoid_13-HODE [M-H+Acetate]	397750	0.68	0.93	0.685	0.33	0.65	0.936
EIC_109	403246	2.46	3.35	0.685	0.88	2.14	0.964
FAHFA_18	522272	-0.31	0.42	0.685	0.06	0.51	0.978
FFA_Arachidic Acid [M-H]	537803	-0.37	0.52	0.688	-0.06	0.56	0.982
EIC_29	354579	0.63	0.88	0.688	0.01	0.58	0.996
EIC_267	224977	0.57	0.79	0.692	-0.33	0.56	0.932
Polar Molecule_CORTICOSTERONE [M-H+Acetate]	140738	0.35	0.49	0.693	0.6	0.44	0.665
Polar Molecule_CORTEXOLONE [M-H]	153590	-0.36	0.5	0.695	-0.08	0.56	0.978
VLCDCA_17	532515	-0.34	0.48	0.695	0.61	0.64	0.806
EIC_224	295140	0.29	0.41	0.696	0.75	0.49	0.592
EIC_158	235415	3.99	5.69	0.698	0.88	3.73	0.978
EIC_64	296371	-0.38	0.55	0.698	-0.29	0.54	0.932
VLCDCA_1	531896	-0.55	0.79	0.699	-0.36	0.87	0.965
FFA_Linoleic Acid [M-H]	526174	-0.33	0.47	0.7	-0.13	0.61	0.978
Polar Molecule_CORTEXOLONE [M-H+Acetate]	159612	0.32	0.47	0.701	0.97	0.41	0.357
Putative_3-Hydroxystanozolol glucuronide	281952	0.45	0.65	0.701	-0.07	0.48	0.978
Putative_4-[5-[[4-[5-[acetyl(hydroxy)amino]pentylamino]-4-oxobutanoyl]-hydroxyamino]pentylamino]-4-oxobutanoic acid	381293	0.38	0.55	0.701	0.03	0.59	0.982
Putative_4-[5-[[4-[5-[acetyl(hydroxy)amino]pentylamino]-4-oxobutanoyl]-hydroxyamino]pentylamino]-4-oxobutanoic acid	390962	-0.34	0.49	0.701	-0.83	0.56	0.612
Putative_1-Pentadecanoyl-sn-glycero-3-phosphocholine	394443	0.23	0.34	0.701	0.24	0.46	0.932
EIC_15	412685	-0.46	0.68	0.701	0.23	0.78	0.974
FFA_Eicosenoic Acid [M-H+Acetate]	534432	-0.25	0.37	0.701	0.05	0.49	0.979
Polar Molecule_ELAIDATE [M-H+Acetate]	527688	-0.34	0.51	0.706	-0.08	0.69	0.979
EIC_51	336280	-0.37	0.56	0.712	-0.13	0.61	0.978
Polar Molecule_OLEOYL-GLYCEROL [M-H+Acetate]	528185	-0.51	0.76	0.712	-0.91	0.84	0.784
VLCDCA_26	535393	-0.37	0.55	0.712	0.29	0.59	0.937
Eicosanoid_PGG2 [M-H+Acetate]	192014	0.49	0.75	0.722	-0.02	0.63	0.986
Docosanoid_10,11-DiHDPA [M-H+Acetate]	346852	0.29	0.45	0.723	0.44	0.44	0.794
VLCDCA_11	537154	-0.26	0.4	0.723	-0.51	0.34	0.592
FAHFA_4	509868	-0.74	1.16	0.726	-0.51	1.04	0.94
EIC_41	183510	0.46	0.72	0.729	0.58	0.57	0.794
FFA_Myristic Acid [M-H+Acetate]	522387	-0.38	0.6	0.73	-0.17	0.57	0.974
Eicosanoid_8(S) HETrE [M-H+Acetate]	445744	-0.39	0.62	0.733	0.91	1.05	0.828
Polar Molecule_N-ACETYLTRYPTOPHAN [M-H]	45049	0.25	0.4	0.733	1.23	0.47	0.302
Eicosanoid_11-dehydro-2,3-dinor-TXB2 [M-H+Acetate]	143490	-0.34	0.55	0.734	-0.26	0.55	0.945
EIC_306	316868	0.32	0.52	0.734	0.38	0.57	0.92
EIC_122	361269	-0.39	0.63	0.734	-0.05	0.6	0.982
VLCDCA_23	535937	-0.3	0.48	0.734	0	0.54	0.999
VLCDCA_32	537601	-0.34	0.55	0.734	0.29	0.55	0.932
Putative_1a-Methyl-5a-androstan-3a,17b-diol glucuronide	96184	0.26	0.43	0.734	0.48	0.79	0.932
Putative_5a-Androstan-3a,17b-diol-17b-glucuronide	157904	0.26	0.42	0.734	-0.04	0.27	0.978
Bile Acid_Lithocholic Acid [M-H]	441724	0.3	0.49	0.734	0.47	0.56	0.838
Eicosanoid_Arachidonic Acid [M-H]	527450	-0.4	0.65	0.734	-0.92	0.52	0.504
EIC_176	370103	-0.31	0.52	0.743	0.11	0.48	0.978
Putative_4-Androsten-17b-ol-3-one glucosiduronate	158439	0.4	0.67	0.744	-0.52	0.49	0.785
Eicosanoid_5,6-diHETrE [M-H]	383602	-0.18	0.3	0.744	-0.16	0.52	0.974
VLCDCA_1	532475	0.37	0.62	0.744	0.25	0.58	0.964
EIC_100	414042	0.34	0.58	0.745	0.36	1.11	0.973
Putative_Bilirubin	528314	-0.34	0.57	0.745	-0.3	0.51	0.932
EIC_251	297013	-0.5	0.86	0.747	-0.84	0.88	0.808
FFA_Behenic Acid [M-H]	542037	-0.26	0.44	0.748	-0.37	0.37	0.794
Eicosanoid_8-iso-15-keto-PGE2 [M-H+Acetate]	178102	0.23	0.41	0.75	0.57	0.43	0.703
EIC_65	333119	0.26	0.45	0.75	0.05	0.54	0.982
EIC_29	356636	0.24	0.42	0.75	0.06	0.43	0.978
Endocannabinoid_N-oleoyl Dopamine [M-H]	528189	-0.33	0.58	0.75	-0.45	0.65	0.919
EIC_144	256466	-0.28	0.49	0.754	0.27	0.75	0.968
EIC_77	435704	-0.3	0.54	0.754	0.09	0.81	0.979
VLCDCA_34	539456	-0.28	0.5	0.755	0.39	0.51	0.881
Eicosanoid_12S-HpEPE [M-H]	392272	0.43	0.76	0.759	0.18	0.88	0.978
Polar Molecule_HEPTADECANOATE [M-H]	529375	-0.23	0.41	0.759	-0.23	0.44	0.932
FFA_Tricosanoic Acid [M-H+Acetate]	542670	0.22	0.39	0.759	0.16	0.39	0.964
Polar Molecule_CORTISOL [M-H+Acetate]	100025	0.25	0.45	0.762	0.66	0.4	0.561
Polar Molecule_OLEOYL-GLYCEROL [M-H]	523301	-0.37	0.67	0.762	0.73	0.96	0.885
Docosanoid_7(S),17(S)-hydroxy DPA [M-H+Acetate]	275325	-0.2	0.36	0.766	-0.04	0.53	0.982
Sterol_Estrone [M-H+Acetate]	202817	0.62	1.15	0.767	0.11	0.66	0.978
Putative_7a,17a-Dimethyl-5b-androstane-3a,17b-diol glucuronide	210760	-0.44	0.82	0.771	0.89	1.36	0.925
Eicosanoid_5,6-EET [M-H+Acetate]	470913	-0.34	0.64	0.775	0.23	0.63	0.968
Eicosanoid_11-dehydro-2,3-dinor-TXB2 [M-H+Acetate]	128452	-0.25	0.47	0.778	0.69	0.58	0.752
EIC_351	175055	0.24	0.47	0.778	0.33	0.4	0.841
Bile Acid_Taurocholic Acid [M-H]	121166	-0.76	1.48	0.779	-0.86	1.34	0.931
Bile Acid_Glycoursodeoxycholic Acid [M-H]	169245	0.35	0.67	0.779	-0.12	0.65	0.978
FFA_Tricosenoic Acid [M-H+Acetate]	536191	0.25	0.48	0.779	-0.22	0.42	0.932
Putative_Hydrocortisone	107173	0.19	0.37	0.783	0.74	0.41	0.497
Polar Molecule_CORTISONE [M-H]	112369	-0.21	0.42	0.783	-0.09	0.42	0.978
Putative_5a-Androstan-3a,17b-diol-17b-glucuronide	150234	-0.28	0.57	0.783	-0.03	0.5	0.982
EIC_310	316877	0.26	0.51	0.783	0.2	0.57	0.968
Eicosanoid_13(S) HOTrE(y) [M-H]	378072	0.31	0.63	0.783	-0.05	0.58	0.982
EIC_345	397350	-0.21	0.42	0.783	1.06	0.82	0.721
Putative_N-Oleoyl-L-serine	524040	-0.21	0.41	0.783	0.31	0.46	0.92
FFA_Behenic Acid [M-H]	539090	0.29	0.58	0.783	0.43	0.45	0.808
Novel EIC_1	405831	0.25	0.51	0.784	0.6	0.65	0.816
Putative_PGPC	448001	0.86	1.75	0.784	-1.05	1.08	0.802
Eicosanoid_17,18-DiHETE [M-H+Acetate]	263807	0.23	0.47	0.786	-0.25	0.49	0.932
Putative_Decylbenzenesulfonic acid	418979	0.41	0.85	0.786	0.69	1.06	0.928
EIC_166	350670	-0.39	0.81	0.788	-0.18	0.64	0.974
FAHFA_22	526407	-0.19	0.4	0.788	0.18	0.55	0.97
Eicosanoid_19(R)-HETE [M-H]	362815	0.3	0.63	0.788	0.55	0.63	0.828
Novel EIC_13	426801	0.3	0.62	0.788	0.35	0.97	0.968
Novel EIC_8	433376	0.22	0.47	0.788	-0.05	0.53	0.982
Putative_5a-Androstan-3a,17b-diol-17b-glucuronide	159009	0.21	0.44	0.79	0.13	0.69	0.978
Polar Molecule_Tetrahydrocortisol [M-H+Acetate]	123097	-0.26	0.56	0.79	0.4	0.65	0.932
Polar Molecule_CORTISOL [M-H]	107951	0.35	0.75	0.792	0.25	0.56	0.956
EIC_122	358178	-0.34	0.74	0.797	0.98	0.82	0.756
EIC_177	263648	0.28	0.62	0.8	-0.34	0.49	0.92
FFA_Nervonic Acid [M-H]	544451	-0.23	0.5	0.801	0.07	0.52	0.978
Eicosanoid_PGF1a [M-H]	171489	-0.25	0.57	0.807	-0.25	0.55	0.949
EIC_356	208342	0.26	0.58	0.808	0.36	0.64	0.932
Putative_11a-Hydroxyprogesterone b-D-glucuronide	282628	0.25	0.58	0.816	0.16	0.73	0.978
Putative_a-Hyodeoxycholic acid methyl ester	343493	0.22	0.53	0.819	0.76	0.48	0.582
Bile Acid_Ursodeoxycholic acid [M-H]	245404	0.39	0.94	0.821	1.8	1.27	0.634
Eicosanoid_DHA [M-H]	523275	0.3	0.72	0.822	1.23	0.99	0.745
Polar Molecule_CORTISONE [M-H+Acetate]	106542	0.19	0.46	0.823	-0.12	0.47	0.978
EIC_178	244703	0.14	0.33	0.823	0.09	0.46	0.978
EIC_73	294423	-0.24	0.6	0.823	0.79	0.7	0.762
Bile Acid_Lithocholic Acid [M-H]	442558	-0.24	0.59	0.823	0.46	0.87	0.932
EIC_102	446037	-0.18	0.43	0.823	0.33	0.48	0.917
VLCDCA_11	533173	0.23	0.56	0.823	-0.42	0.51	0.849
VLCDCA_17	534730	-0.3	0.74	0.823	-0.37	0.78	0.941
Eicosanoid_13,14-dihydro-PGF1a [M-H]	195192	0.27	0.68	0.83	-0.08	0.72	0.979
EIC_68	383553	-0.18	0.45	0.83	-0.11	0.39	0.974
EIC_65	321476	-0.16	0.42	0.83	0.53	0.51	0.794
VLCDCA_7	542382	0.28	0.71	0.83	-0.28	0.69	0.964
EIC_62	253339	-0.29	0.76	0.831	-0.22	0.79	0.974
Eicosanoid_12-HHTrE [M-H+Acetate]	332750	0.94	2.43	0.831	1.12	2.82	0.968
EIC_303	333176	0.23	0.61	0.831	0.49	0.58	0.837
FFA_Palmitoleic Acid [M-H+Acetate]	526018	-0.15	0.39	0.831	0.29	0.43	0.919
Eicosanoid_PGG2 [M-H+Acetate]	184987	0.3	0.79	0.832	0.04	0.62	0.982
Eicosanoid_PDX [M-H+Acetate]	282516	-0.22	0.58	0.832	-0.42	0.65	0.931
Polar Molecule_VITAMIN D2 [M-H]	531344	0.19	0.49	0.832	-0.15	0.61	0.978
VLCDCA_45	534494	-0.25	0.67	0.832	0.5	0.74	0.92
VLCDCA_40	540421	-0.21	0.58	0.832	0.92	0.98	0.809
FFA_Lignoceric Acid [M-H+Acetate]	546323	-0.2	0.53	0.832	-0.21	0.46	0.945
Polar Molecule_CORTISONE [M-H+Acetate]	112455	-0.17	0.46	0.836	-0.13	0.45	0.974
EIC_158	238213	2.94	8.16	0.836	-4.98	4.92	0.794
EIC_176	379289	0.19	0.52	0.836	-0.51	0.43	0.762
FFA_Behenic Acid [M-H]	540593	0.14	0.38	0.836	0.47	0.39	0.756
FAHFA_8	518912	0.18	0.5	0.843	-0.16	0.39	0.966
EIC_232	222789	0.16	0.45	0.844	-0.57	0.49	0.76
Eicosanoid_tetranor 12(R) HETE [M-H]	331464	0.16	0.45	0.844	0.17	0.52	0.973
Eicosanoid_12-oxoETE [M-H]	423400	-0.16	0.46	0.844	0.21	0.5	0.964
VLCDCA_15	533187	0.16	0.45	0.844	0.17	0.58	0.974
EIC_188	171462	0.16	0.47	0.848	0.66	0.46	0.627
Eicosanoid_PGF1a [M-H]	174973	-0.18	0.54	0.848	-0.12	0.45	0.975
EIC_138	191819	-0.25	0.74	0.848	-0.43	0.75	0.932
EIC_192	402518	0.13	0.41	0.857	0.01	0.47	0.996
EIC_122	368273	-0.23	0.72	0.862	0.56	0.75	0.89
Putative_2a-Methyl-5a-androstan-3a-ol-17-one glucuronide	98088	0.17	0.54	0.862	0.34	0.6	0.932
Putative_7a,17a-Dimethyl-5b-androstane-3a,17b-diol glucuronide	199356	0.48	1.54	0.863	1.44	1.97	0.893
FFA_Pentadecanoic Acid [M-H]	528566	-0.14	0.47	0.865	0.44	0.6	0.893
Novel EIC_24	466757	0.19	0.62	0.867	0.08	1.02	0.982
Eicosanoid_7,17 dhDPA [M-H+Acetate]	289392	0.09	0.31	0.87	0.22	0.36	0.932
Putative_7-Keto-3a,12-a-dihydroxycholanic acid	173610	0.16	0.55	0.876	-0.31	0.57	0.932
Eicosanoid_13S-HpOTrE(gamma) [M-H]	387101	0.16	0.57	0.876	1.21	1	0.752
FFA_Docosaenoic Acid [M-H+Acetate]	535281	-0.24	0.86	0.884	-0.27	0.77	0.968
FFA_Lignoceric Acid [M-H]	544841	0.14	0.51	0.884	0.33	0.6	0.932
Bile Acid_Glycoursodeoxycholic Acid [M-H]	173155	-0.31	1.17	0.885	-0.52	1.15	0.949
Putative_7a,17a-Dimethyl-5b-androstane-3a,17b-diol glucuronide	203097	0.41	1.53	0.885	0.96	1.62	0.932
EIC_7	401671	0.22	0.81	0.885	-0.9	0.59	0.592
Polar Molecule_LUMICHROME [M-H]	51894	-0.15	0.57	0.885	-0.06	0.56	0.979
Eicosanoid_Arachidonic Acid [M-H]	525365	-0.13	0.48	0.885	0.39	0.62	0.932
Polar Molecule_OLEOYL-GLYCEROL [M-H]	531324	-0.11	0.42	0.885	0.17	0.48	0.968
FFA_Docosadienoic Acid [M-H]	539086	0.32	1.22	0.885	0.38	1.36	0.974
Polar Molecule_allo-Tetrahydrocortisol [M-H+Acetate]	97322	-0.2	0.75	0.885	-0.74	0.62	0.752
EIC_191	412743	0.12	0.45	0.886	0.2	0.44	0.948
FFA_Palmitoleic Acid [M-H]	526135	-0.1	0.39	0.894	0.25	0.41	0.932
FFA_Lignoceric Acid [M-H]	546284	0.13	0.53	0.894	-0.21	0.5	0.964
EIC_250	186140	0.15	0.64	0.898	-0.11	0.5	0.978
Polar Molecule_ROSMARINATE [M-H]	46338	-0.09	0.4	0.903	0.26	0.54	0.941
EIC_178	251262	0.7	3.1	0.903	-1.24	2.63	0.945
Eicosanoid_12epi LTB4 [M-H+Acetate]	285289	-0.11	0.51	0.903	0.1	0.56	0.978
FFA_Heptadecaenoic Acid [M-H+Acetate]	531646	-0.2	0.89	0.903	0.42	0.76	0.932
EIC_122	365097	0.21	0.95	0.909	0.97	0.96	0.794
EIC_14	394634	-0.19	0.88	0.913	-0.68	0.85	0.856
Polar Molecule_CORTISONE [M-H+Acetate]	100714	-0.13	0.6	0.913	-0.59	0.48	0.745
Eicosanoid_13,14-dihydro-15-keto-PGA2 [M-H+Acetate]	253519	-0.14	0.68	0.916	-0.2	0.69	0.974
Bile Acid_Ursodeoxycholic acid [M-H+Acetate]	241332	0.11	0.56	0.916	0	0.43	0.998
Eicosanoid_EPA [M-H]	518723	-0.09	0.45	0.922	-0.15	0.38	0.968
EIC_45	226969	-0.09	0.49	0.923	-0.03	0.45	0.982
EIC_62	263579	0.09	0.51	0.923	0.01	0.6	0.992
Putative_Abietic acid	518727	-0.08	0.44	0.923	-0.2	0.4	0.932
Polar Molecule_OLEOYL-GLYCEROL [M-H]	522767	0.15	0.81	0.923	0.07	0.71	0.982
VLCDCA_40	537628	0.1	0.51	0.923	-0.11	0.47	0.978
Novel EIC_14	448206	-0.14	0.78	0.923	-0.51	0.87	0.932
VLCDCA_6	532891	-0.15	0.83	0.926	-0.69	0.78	0.828
FAHFA_12	523559	0.11	0.66	0.929	-0.74	0.65	0.762
VLCDCA_8	537536	-0.12	0.71	0.93	-1.03	0.7	0.614
EIC_108	414045	0.09	0.53	0.934	0.51	0.91	0.932
Polar Molecule_CORTEXOLONE [M-H+Acetate]	155822	0.09	0.57	0.937	1.15	0.75	0.592
EIC_24	422518	-0.08	0.53	0.937	0.84	0.57	0.614
Polar Molecule_LUMICHROME [M-H]	57910	0.11	0.72	0.937	-0.77	0.5	0.592
FFA_Myristic Acid [M-H]	527646	0.08	0.56	0.939	0.45	0.5	0.822
Bile Acid_b-Muricholic Acid [M-H]	237948	-0.37	2.48	0.939	7.12	6.24	0.762
Docosanoid_7,8-DiHDPA [M-H]	364273	-0.06	0.44	0.944	-0.43	0.35	0.752
EIC_348	329017	0.05	0.37	0.947	0.77	0.47	0.573
Putative_4-Androsten-17b-ol-3-one glucosiduronate	153131	-0.11	0.8	0.949	-0.8	0.58	0.654
Putative_Androstan-3-ol-17-one 3-glucuronide	167264	0.06	0.48	0.949	0.49	0.52	0.809
FAHFA_56	530580	0.08	0.61	0.949	0.52	0.53	0.794
FFA_Behenic Acid [M-H+Acetate]	542079	-0.07	0.56	0.949	-0.28	0.49	0.932
EIC_121	285160	-0.07	0.55	0.954	-0.22	0.49	0.951
EIC_26	441431	-0.06	0.53	0.956	0.71	0.58	0.752
EIC_169	349398	0.07	0.61	0.957	-0.46	0.51	0.816
FFA_Tricosanoic Acid [M-H]	544047	-0.05	0.41	0.957	0.27	0.46	0.932
Bile Acid_Chenodeoxycholic acid [M-H+Acetate]	329139	-0.13	1.19	0.959	0.49	1.44	0.968
Putative_Hydrocortisone 21-hemisuccinate	111837	-0.05	0.56	0.967	0.42	0.61	0.919
Putative_3-Hydroxystanozolol glucuronide	271639	0.08	0.88	0.967	-0.94	0.83	0.762
EIC_86	450186	-0.04	0.44	0.975	0.95	0.48	0.435
EIC_69	416464	-0.05	0.68	0.977	-0.29	0.62	0.948
FFA_Myristic Acid [M-H]	520512	0.04	0.46	0.977	2.34	1.2	0.447
Polar Molecule_CORTISOL [M-H+Acetate]	111953	0.04	0.57	0.979	0.53	0.6	0.828
EIC_224	298220	-0.03	0.43	0.979	0.76	0.83	0.816
EIC_135	324550	0.04	0.51	0.979	-0.08	0.55	0.978
Putative_1a-Methyl-5a-androstan-3a,17b-diol glucuronide	100107	0.03	0.52	0.982	0.16	0.49	0.968
EIC_312	348127	-0.03	0.46	0.982	0.07	0.47	0.978
VLCDCA_23	534469	0.03	0.42	0.982	-0.04	0.44	0.982
Polar Molecule_CORTISOL [M-H]	111875	0.03	0.68	0.984	0.37	0.65	0.932
Putative_6-((E)-2-((1R,2S,3R,5S)-3,5-Dihydroxy-2-((Z)-oct-2-enyl)cyclopentyl)vinyl)tetrahydro-2H-pyran-2-one	174904	0.03	0.57	0.984	0.34	0.46	0.893
EIC_158	226291	-0.02	0.49	0.984	0.5	0.84	0.932
EIC_110	437709	-0.03	0.58	0.984	-0.05	0.97	0.983
Eicosanoid_Arachidonic Acid [M-H]	531480	0.02	0.45	0.984	-0.95	0.43	0.367
EIC_233	167632	-0.03	0.62	0.986	0.1	0.72	0.978
EIC_263	208281	-0.01	0.37	0.986	0.75	0.44	0.529
EIC_63	399217	-0.02	0.53	0.986	0.23	0.44	0.932
Putative_Heneicosapentaenoic acid	524788	0.03	0.87	0.988	-0.26	0.61	0.964
VLCDCA_23	533191	0.02	0.64	0.988	-0.76	0.54	0.65
Polar Molecule_TRICOSANOATE [M-H]	539374	-0.01	0.4	0.998	0.72	0.42	0.529
Putative_Bilirubin	525957	0.01	0.78	0.999	0.01	0.82	0.996
Eicosanoid_11b PGE2 [M-H]	104963	0	0.39	0.999	-0.36	0.34	0.784
Eicosanoid_11(12)-EpETE [M-H+Acetate]	421573	0	0.55	0.999	-0.19	0.56	0.968
Putative_1-Palmitoyl-2-hydroxy-sn-glycero-3-phosphoethanolamine	444474	0.01	0.49	0.999	0.41	0.46	0.822
Polar Molecule_PALMITOLEATE [M-H+Acetate]	520124	0	0.38	0.999	1.82	1.11	0.561
Polar Molecule_ERUCATE [M-H+Acetate]	533386	0	0.62	0.999	-0.1	0.48	0.978
FFA_Tricosenoic Acid [M-H]	539371	0	0.39	0.999	0.42	0.46	0.816
VLCDCA_14	541584	0.01	0.72	0.999	0.35	0.7	0.937
Set of analyzed features where internal standards have been exlcluded.

## Sheet: Supplementary Table 5.
Supplementary Table 5. The effect of intensive fat mass loss and fat mass regain on LC-MS-Metabolome in the diet group compared to control group of physique study participants, when adjusted with android fat mass (DEXA)
Annotation and adduct information		PRE-MID			PRE-POST
Metabolite ID	Matching ID	Estimate	Standard error	FDR	Estimate	Standard error	FDR
Polar Molecule_TRICOSANOATE [M-H]	539374	4.7544063	1.0314	0.002899	-0.853193	0.6174	0.8019
FFA_Tricosenoic Acid [M-H]	539371	4.3165711	1.0050	0.004182	-0.862462	0.5386	0.7484
FFA_Nervonic Acid† [M-H]	541517	2.8725438	0.6560	0.004182	1.623475	0.5892	0.5922
EIC_260	267578	2.2642468	0.5554	0.006556	0.071729	0.5743	0.9871
Novel EIC_5	373373	2.6341204	0.6454	0.006556	0.415709	0.5850	0.9198
Eicosanoid_13S-HpOTrE(gamma) [M-H]	387101	4.0410385	1.0951	0.022960	-1.601664	1.0848	0.7604
Polar Molecule_OLEOYL-GLYCEROL [M-H]	523301	5.7701888	1.5780	0.022960	-0.934129	1.0947	0.8993
FFA_Behenic Acid† [M-H]	540593	2.3377428	0.6376	0.022960	-0.392801	0.4788	0.8993
FFA_Tricosenoic Acid [M-H]	542617	3.6754951	1.0175	0.024251	0.313750	0.6007	0.9486
EIC_69	419015	6.7478521	1.9088	0.024419	1.249610	1.3318	0.8993
Polar Molecule_GAMMA-LINOLENATE [M-H]	516521	-2.3130730	0.6532	0.024419	0.047002	0.7330	0.9983
Putative_N-Oleoyl-L-serine	524040	3.4012239	0.9594	0.024419	-0.947169	0.5571	0.7024
EIC_64	296371	5.6006604	1.6811	0.041394	0.658315	0.7088	0.8993
Novel EIC_28	457606	10.7732221	3.1988	0.041394	-0.522905	0.6690	0.8993
Polar Molecule_CORTISONE [M-H+Acetate]	106542	2.3156019	0.7073	0.044839	0.829112	0.6108	0.8019
FFA_Lignoceric Acid† [M-H+Acetate]	546323	4.1011428	1.2499	0.044839	0.416639	0.5977	0.9215
FFA_Tricosanoic Acid† [M-H]	544047	2.3895069	0.7423	0.051405	-0.349593	0.5770	0.9354
FFA_Nervonic Acid† [M-H]	544451	2.9274614	0.9213	0.056219	-0.692172	0.6727	0.8993
Novel EIC_9	424299	4.0611068	1.2932	0.060679	-1.501265	0.6851	0.6501
EIC_17	404135	2.8247823	0.9231	0.075764	0.374089	0.7145	0.9486
EIC_71	312209	3.4995391	1.1607	0.082630	0.697749	0.6943	0.8993
Eicosanoid_11,12-diHETrE [M-H+Acetate]	350152	5.0051292	1.6648	0.082630	0.708009	0.9794	0.9178
FFA_Behenic Acid† [M-H]	542037	2.8408369	0.9541	0.087094	0.008015	0.5430	0.9985
Polar Molecule_CORTISONE [M-H+Acetate]	100714	2.4657132	0.8364	0.091639	1.115801	0.6134	0.6786
Bile Acid_Taurocholic Acid [M-H]	121166	7.6920625	2.6190	0.091639	0.790370	1.5580	0.9486
EIC_69	413523	3.3254754	1.1469	0.092624	0.113753	0.7334	0.9849
FFA_Lignoceric Acid† [M-H]	544841	3.0287998	1.0435	0.092624	-0.446872	0.7373	0.9354
FFA_Lignoceric Acid† [M-H]	546284	4.2684443	1.4608	0.092624	0.411061	0.6550	0.9354
EIC_271	281689	3.8458129	1.3400	0.095187	1.148394	0.7735	0.7604
EIC_121	285160	3.0930781	1.0752	0.095187	0.177801	0.6368	0.9793
FFA_Nervonic Acid† [M-H]	545847	2.6192606	0.9160	0.095368	0.182277	0.6545	0.9793
EIC_233	167632	3.2412866	1.1446	0.100825	0.656579	0.8536	0.8993
EIC_125	185482	6.4022905	2.2904	0.106581	-0.989909	0.8014	0.8470
Eicosanoid_11,12-diHETrE [M-H]	355943	2.3871097	0.8561	0.106581	0.649337	0.6126	0.8993
EIC_69	416464	4.5596389	1.6366	0.106581	0.800438	1.0222	0.8993
Putative_1-Oleoyl-sn-glycero-3-phosphoethanolamine	463104	2.7950145	1.0074	0.107447	-0.881809	0.5618	0.7499
Eicosanoid_11-dehydro-2,3-dinor-TXB2 [M-H+Acetate]	132844	3.5476000	1.2969	0.114856	-0.602756	0.5967	0.8993
Eicosanoid_2,3-dinor-PGE1 [M-H+Acetate]	139967	-1.4692449	0.5360	0.114856	-1.118723	0.6180	0.6787
EIC_62	253339	6.3132195	2.3574	0.129877	-0.368111	0.8863	0.9486
EIC_73	294423	3.8717309	1.4419	0.129877	-0.625414	0.8059	0.8993
Eicosanoid_13,14-dihydro-15-keto-PGA2 [M-H+Acetate]	253519	4.8700799	1.8346	0.135925	-0.350794	0.7769	0.9486
EIC_63	399217	3.3858338	1.2818	0.138048	-0.110215	0.6847	0.9849
Novel EIC_8	433376	3.4016408	1.2969	0.142494	-0.087258	0.6941	0.9871
EIC_51	336280	2.4319803	0.9353	0.148894	-0.419719	0.7310	0.9354
EIC_184	334912	1.8313689	0.7088	0.152800	0.930503	0.5910	0.7499
EIC_121	298758	2.9459980	1.1467	0.155956	-2.475200	1.2376	0.6501
EIC_52	240462	2.8863264	1.1323	0.161766	-0.318102	0.5438	0.9354
Bile Acid_Chenodeoxycholic acid [M-H]	335887	12.6574914	5.0262	0.169579	-6.901442	3.7371	0.6586
Eicosanoid_5S-HpEPE [M-H]	400564	2.3889022	0.9482	0.169579	-0.108435	0.6244	0.9849
EIC_62	263579	3.4493044	1.3879	0.175604	-0.204643	0.6954	0.9793
Bile Acid_Chenodeoxycholic acid [M-H+Acetate]	335959	12.0640093	4.8498	0.175604	-6.643627	3.6037	0.6586
FFA_Docosaenoic Acid† [M-H]	537429	2.3059099	0.9244	0.175604	0.423012	0.6747	0.9354
EIC_47	197702	2.8353917	1.1522	0.179029	0.250939	0.8669	0.9793
Bile Acid_b-Muricholic Acid [M-H]	235527	12.0759990	4.9405	0.179029	-6.965372	3.7552	0.6586
Bile Acid_b-Muricholic Acid [M-H+Acetate]	235588	11.9826566	4.8864	0.179029	-6.436338	3.7131	0.6940
Novel EIC_9	422540	2.8847001	1.1748	0.179029	-1.699544	0.7087	0.5922
FFA_Pentadecanoic Acid† [M-H]	528566	-1.8321779	0.7513	0.179029	-0.760728	0.7752	0.8993
FFA_Tricosanoic Acid† [M-H+Acetate]	542670	1.7745597	0.7291	0.179029	-0.422726	0.4966	0.8993
FAHFA_15	527360	-1.8499461	0.7678	0.185251	-0.345662	0.7871	0.9486
Eicosanoid_14,15-DiHETE [M-H+Acetate]	298878	2.8302160	1.1813	0.189248	-0.083765	0.7430	0.9916
EIC_125	198399	3.5035016	1.5193	0.195503	1.026627	1.7065	0.9354
Putative_Levofloxacin	34432	-1.3182747	0.5675	0.195503	-0.672805	0.5516	0.8543
Bile Acid_Deoxycholic Acid [M-H+Acetate]	346895	10.4200727	4.4981	0.195503	-4.991608	1.8174	0.5922
Bile Acid_Deoxycholic Acid [M-H]	353270	5.1547229	2.2177	0.195503	-2.923199	1.4086	0.6501
Bile Acid_Deoxycholic Acid [M-H+Acetate]	353332	5.5215418	2.3661	0.195503	-3.063526	1.4872	0.6501
Eicosanoid_9(S) HOTrE [M-H]	353929	2.0954635	0.9094	0.195503	-0.346845	0.6486	0.9486
Eicosanoid_8,9-diHETrE [M-H]	357813	1.6677189	0.7021	0.195503	1.218607	0.6502	0.6586
Eicosanoid_13S-HpOTrE [M-H]	370062	2.9430593	1.2488	0.195503	-1.106609	0.6320	0.6924
Eicosanoid_5,6-diHETrE [M-H]	390693	-2.3733263	1.0292	0.195503	-1.793043	0.9669	0.6586
EIC_345	397350	2.5708751	1.1095	0.195503	-1.132108	0.9644	0.8773
FFA_Palmitoleic Acid† [M-H]	526135	-1.4410863	0.6252	0.195503	-0.025080	0.5241	0.9984
FFA_Eicosenoic Acid [M-H+Acetate]	534432	1.7485249	0.7544	0.195503	-0.238553	0.7135	0.9734
FFA_Nervonic Acid† [M-H]	539105	2.4024552	1.0218	0.195503	-0.730488	0.5541	0.8194
FFA_Behenic Acid† [M-H+Acetate]	542079	2.6431598	1.1347	0.195503	-0.382242	0.6483	0.9354
EIC_14	394634	4.6958681	2.0467	0.197280	0.192002	0.9703	0.9828
FAHFA_71	537708	2.1594714	0.9425	0.197280	0.537460	0.7078	0.8993
Putative_Chenodeoxycholic acid 24-acyl-b-D-glucuronide	236149	3.2643625	1.4431	0.210359	0.269216	0.8364	0.9772
Eicosanoid_11-dehydro-2,3-dinor-TXB2 [M-H+Acetate]	136286	1.6255949	0.7221	0.213747	-0.573583	0.6068	0.8993
Bile Acid_Glycochenodeoxycholic Acid [M-H]	255997	4.1104878	1.8317	0.215097	-1.865049	0.9261	0.6501
Eicosanoid_13-HODE [M-H+Acetate]	397750	2.9106129	1.3058	0.220968	0.027103	0.7702	0.9985
FFA_Tricosanoic Acid† [M-H]	542623	1.6568998	0.7464	0.223471	-0.577288	0.5174	0.8993
EIC_229	193228	1.3748618	0.6213	0.225017	0.295606	0.5947	0.9486
Eicosanoid_PGE3 [M-H+Acetate]	148936	1.5255859	0.6924	0.227939	0.137240	0.5456	0.9793
Eicosanoid_15 oxoEDE [M-H+Acetate]	467225	2.2133927	1.0137	0.235974	0.665414	0.7862	0.8993
Polar Molecule_OLEOYL-GLYCEROL [M-H]	522767	3.3357164	1.5297	0.235974	0.332241	1.0033	0.9734
EIC_62	256944	3.1609398	1.4553	0.238458	-0.407810	0.9182	0.9486
FFA_Heptadecaenoic Acid† [M-H+Acetate]	531646	7.2798079	3.3734	0.244345	0.425245	0.9504	0.9486
Eicosanoid_tetranor 12(R) HETE [M-H+Acetate]	320002	1.9005903	0.8902	0.253217	1.339444	0.7415	0.6787
FFA_Tricosenoic Acid [M-H]	541791	2.0410104	0.9559	0.253217	-1.482562	0.6369	0.6501
EIC_45	226969	1.4659136	0.6894	0.255943	0.626483	0.5963	0.8993
EIC_322	247451	1.2393852	0.5889	0.267414	0.416738	0.5588	0.9022
Bile Acid_Ursodeoxycholic acid [M-H+Acetate]	237318	3.1127088	1.4852	0.270349	-1.405391	0.9838	0.7812
Polar Molecule_CORTISOL [M-H]	107951	1.9583655	0.9396	0.272422	0.199185	0.7008	0.9793
Putative_Androsterone glucuronide	170446	2.9018185	1.3905	0.272422	-1.452480	0.5980	0.5922
EIC_63	392256	3.5766806	1.7302	0.281183	0.052805	1.3194	0.9985
Polar Molecule_ERUCATE [M-H+Acetate]	533386	2.3708944	1.1517	0.284287	-0.207139	0.6732	0.9793
EIC_71	298732	2.4848102	1.2113	0.285467	-0.106490	0.7898	0.9850
EIC_306	316868	1.9874118	0.9701	0.285467	0.101422	0.7263	0.9850
Bile Acid_Tauroursodeoxycholic acid [M-H]	164435	3.3145632	1.6463	0.288217	1.283239	1.3584	0.8993
EIC_303	333176	1.9851448	0.9874	0.288217	0.186240	0.7108	0.9793
EIC_176	379289	2.1897906	1.0862	0.288217	0.930639	0.5507	0.7024
EIC_16	399201	1.8279373	0.9025	0.288217	0.084737	0.6312	0.9850
EIC_100	410589	-1.6720674	0.8291	0.288217	-1.560709	1.0956	0.7812
FFA_Myristic Acid [M-H+Acetate]	522387	-1.8259535	0.9017	0.288217	0.062621	0.8039	0.9983
FFA_Palmitoleic Acid† [M-H+Acetate]	526018	-1.3002617	0.6410	0.288217	0.011065	0.5633	0.9985
FFA_Linoleic Acid† [M-H]	526174	-1.4379555	0.7142	0.288217	0.128407	0.7687	0.9849
VLCDCA_15	533187	-1.4011193	0.6973	0.288217	-0.940358	0.7375	0.8312
Eicosanoid_13,14-dihydro-PGE1 [M-H]	198449	1.7949221	0.8980	0.292889	1.836433	0.6378	0.5922
FFA_Myristic Acid [M-H]	522346	-1.7476560	0.8764	0.293627	-0.036498	0.7724	0.9984
EIC_166	350670	2.8343025	1.4295	0.293752	-0.276400	0.8138	0.9703
Eicosanoid_12S-HpEPE [M-H]	392272	2.3778867	1.1986	0.293752	0.188102	0.9825	0.9828
Putative_2-Hydroxypalmitic acid	525710	-1.3076955	0.6586	0.293752	0.001371	0.6641	0.9985
Putative_Androsterone glucuronide	179343	3.6604556	1.8785	0.315489	-0.654440	0.6795	0.8993
EIC_137	217947	1.7406483	0.8951	0.315728	-0.772825	0.8053	0.8993
Bile Acid_Ursodeoxycholic acid [M-H]	237244	3.1045354	1.5996	0.315894	-1.244027	1.0270	0.8543
EIC_65	333119	3.6370851	1.8820	0.319295	-0.489700	0.9021	0.9486
EIC_267	224977	-1.9256414	1.0040	0.327084	0.488549	0.9345	0.9486
EIC_110	433852	1.4035761	0.7343	0.327084	0.602319	0.6820	0.8993
FAHFA_76	545467	-1.6109539	0.8418	0.327084	-1.451963	0.7709	0.6586
Docosanoid_7-epi-Maresin 1 [M-H+Acetate]	254854	-7.4603533	3.9117	0.327591	-2.883470	2.2923	0.8433
FAHFA_22	526407	-1.2629581	0.6665	0.334322	0.017643	0.6991	0.9985
EIC_1	325888	1.7328801	0.9290	0.346566	-0.756361	0.9509	0.8993
EIC_181	341438	1.2618843	0.6734	0.346566	0.614869	0.7848	0.8993
Putative_Levofloxacin	36118	1.3730067	0.7358	0.346566	0.530076	0.7038	0.9014
VLCDCA_1	531095	-1.6260136	0.8719	0.346566	-0.990982	0.9928	0.8993
EIC_263	204232	0.9620789	0.5231	0.359553	-0.663322	0.5462	0.8543
Bile Acid_b-Muricholic Acid [M-H]	237948	23.0250165	12.5281	0.359553	-7.690617	6.7661	0.8993
Eicosanoid_8(S) HETrE [M-H+Acetate]	445744	2.0364619	1.1094	0.359553	-1.100697	1.1822	0.8993
FAHFA_14	522914	-1.5215127	0.8292	0.359553	-0.196835	0.6539	0.9793
FFA_Palmitoleic Acid† [M-H]	529701	-1.2143580	0.6643	0.362474	0.784018	0.6057	0.8232
Polar Molecule_HEPTADECANOATE [M-H]	529375	-1.4717917	0.8138	0.375674	0.130653	0.7043	0.9828
EIC_178	254050	-7.3925981	4.1002	0.377438	-3.646331	2.6597	0.8019
EIC_33	446442	2.1109623	1.1769	0.379601	-2.045603	1.3887	0.7604
Putative_PGPC	448001	5.0201020	2.7979	0.379601	0.171180	1.2438	0.9850
Eicosanoid_13,14-dihydro-PGE1 [M-H]	185541	1.4586419	0.8161	0.382249	0.123638	0.5660	0.9793
FAHFA_47	529594	-2.0722137	1.1641	0.385472	0.766261	1.1145	0.9304
EIC_22	406441	1.4423074	0.8125	0.386982	-0.193694	0.7290	0.9793
Novel EIC_6	225577	-1.2659692	0.7248	0.392123	-1.097671	0.8322	0.8194
Eicosanoid_LTB4 ethanol amide [M-H+Acetate]	227844	1.7982508	1.0204	0.392123	1.567056	1.0554	0.7604
Eicosanoid_7,17 dhDPA [M-H+Acetate]	289392	0.9568670	0.5459	0.392123	0.280058	0.5013	0.9379
EIC_65	321476	1.7254908	0.9774	0.392123	-1.562022	0.6993	0.6501
EIC_20	393655	2.3213436	1.3283	0.392123	-1.089975	1.0568	0.8993
FFA_Eicosenoic Acid [M-H]	533336	-1.6401510	0.9349	0.392123	0.616596	0.6908	0.8993
Polar Molecule_allo-Tetrahydrocortisol [M-H+Acetate]	84478	1.2542564	0.7156	0.392123	0.010975	0.7990	0.9985
EIC_303	328235	1.3028141	0.7601	0.417541	-0.159857	0.8598	0.9828
Eicosanoid_tetranor-PGFM [M-H]	31459	-1.9693905	1.1535	0.420623	-1.241784	1.0230	0.8543
Polar Molecule_CORTICOSTERONE [M-H+Acetate]	140738	-1.2884934	0.7570	0.422291	-1.067623	0.5576	0.6586
EIC_51	330923	1.5560196	0.9157	0.422291	0.234843	0.8917	0.9793
Putative_Abietic acid	514832	-3.8358187	2.2729	0.429932	-1.000297	0.9749	0.8993
Eicosanoid_15t-Protectin D1 [M-H+Acetate]	275324	-1.2723904	0.7561	0.431343	-0.554997	0.6172	0.8993
EIC_29	356636	1.2711323	0.7569	0.431763	0.428859	0.5522	0.8993
EIC_312	348127	1.4506674	0.8666	0.433855	0.377267	0.6628	0.9354
EIC_225	261389	-1.0389078	0.6222	0.434873	-0.127927	0.5841	0.9793
Putative_Glycocholic acid	179340	2.8989162	1.7626	0.436401	-1.398088	0.7511	0.6586
Eicosanoid_PGG2 [M-H+Acetate]	192014	-1.9495262	1.1714	0.436401	-0.978188	0.9104	0.8993
Bile Acid_Glycochenodeoxycholic Acid [M-H]	237311	1.4675752	0.8894	0.436401	-1.050494	0.5280	0.6501
EIC_124	240491	1.6920991	1.0251	0.436401	0.727208	1.1654	0.9354
EIC_310	316877	1.5523193	0.9427	0.436401	0.407401	0.7580	0.9486
EIC_135	324550	1.9216326	1.1656	0.436401	0.105100	0.8256	0.9871
Putative_1-Pentadecanoyl-sn-glycero-3-phosphocholine	394443	1.0560615	0.6423	0.436401	-0.468118	0.5677	0.8993
EIC_100	414042	1.5228679	0.9250	0.436401	0.008514	1.1887	0.9985
FFA_Palmitoleic Acid† [M-H]	531843	-1.2920237	0.7880	0.437783	0.422499	0.6919	0.9354
Eicosanoid_5,6-diHETrE [M-H]	383602	1.0241203	0.6262	0.439027	0.623802	0.6823	0.8993
Putative_4-[5-[[4-[5-[acetyl(hydroxy)amino]pentylamino]-4-oxobutanoyl]-hydroxyamino]pentylamino]-4-oxobutanoic acid	381293	-1.3624605	0.8361	0.440530	0.418591	0.8146	0.9486
FFA_Heptadecaenoic Acid† [M-H]	529369	-1.4404021	0.8848	0.440530	0.046755	0.7145	0.9983
FFA_a-linolenic Acid† [M-H]	517566	-2.3231216	1.4304	0.441340	-0.620761	0.8143	0.8993
EIC_135	321522	1.7110170	1.0576	0.444491	0.057021	0.7445	0.9983
Polar Molecule_N-ACETYLTRYPTOPHAN [M-H+Acetate]	49032	-2.0536399	1.2726	0.445601	-0.416692	0.9412	0.9486
EIC_95	408174	-1.1209635	0.6964	0.446565	-0.334887	0.7225	0.9486
FAHFA_62	533738	-1.2524451	0.7794	0.446565	-1.482796	0.8862	0.7063
Eicosanoid_PGE3 [M-H+Acetate]	145653	0.9870607	0.6165	0.446740	-0.098918	0.6067	0.9849
Putative_Bilirubin	525957	-1.9747021	1.2330	0.446740	-1.588385	1.1209	0.7812
EIC_158	226291	1.4677990	0.9248	0.456855	-0.358755	0.9647	0.9584
Putative_1,3,5(10)-Estratrien-3,17b-diol 17-glucosiduronate	271516	-1.5074641	0.9552	0.462638	-0.914995	0.7710	0.8773
Eicosanoid_LTF4 [M-H]	266556	-1.7215581	1.1006	0.470430	0.828236	0.5981	0.8019
EIC_68	383553	1.5058921	0.9627	0.470430	-0.736892	0.5956	0.8470
Bile Acid_Ursodeoxycholic acid [M-H+Acetate]	241332	1.6566227	1.0625	0.472528	0.744714	0.6196	0.8635
EIC_108	414045	1.2562888	0.8096	0.477017	0.140491	0.9880	0.9850
Eicosanoid_13,14-dihydro-15-keto-PGE1 [M-H]	215016	-3.4538686	2.2311	0.477767	-0.713831	1.4704	0.9486
FFA_Behenic Acid† [M-H]	539090	1.5124473	0.9806	0.480528	0.455956	0.9320	0.9486
EIC_41	183510	1.5016139	0.9875	0.498920	0.052595	0.7316	0.9983
Putative_Dodecylbenzenesulfonic acid	399899	1.6155911	1.0647	0.499307	-0.654285	0.9579	0.9334
EIC_176	370103	1.2030253	0.7972	0.499441	0.802234	0.6849	0.8773
EIC_23	437680	1.6101229	1.0651	0.499441	-0.565933	0.7439	0.8993
FFA_Oleic Acid† [M-H+Acetate]	532675	1.4685210	0.9697	0.499441	0.082314	0.9656	0.9983
Bile Acid_Glycoursodeoxycholic Acid [M-H]	169245	1.4165919	0.9404	0.499462	-0.337579	0.7330	0.9486
Eicosanoid_PGG2 [M-H+Acetate]	184987	-1.9583725	1.3111	0.506486	-0.266421	1.0088	0.9793
EIC_194	407696	1.4955287	1.0138	0.522104	0.499783	0.8063	0.9354
Polar Molecule_GLYCOCHOLATE [M-H]	170444	2.0296146	1.4155	0.551439	-1.274994	0.5462	0.6501
Eicosanoid_8-iso-PGA2 [M-H+Acetate]	222096	1.0935645	0.7590	0.551439	-0.154227	0.6321	0.9793
EIC_303	338181	1.1044204	0.7734	0.551439	-0.003896	0.6814	0.9985
EIC_80	358635	-3.4211537	2.3881	0.551439	-1.045831	0.7336	0.7812
Eicosanoid_5,6-diHETrE [M-H]	386644	-1.3064998	0.9054	0.551439	-1.356857	1.0365	0.8203
Polar Molecule_ROSMARINATE [M-H]	46338	1.1351164	0.7951	0.551439	0.595652	0.9574	0.9354
VLCDCA_7	539773	1.7501297	1.2259	0.551439	-0.685891	0.7961	0.8993
Polar Molecule_GLYCOCHOLATE [M-H]	172623	2.7957115	1.9884	0.557442	-1.773697	0.8145	0.6501
Putative_Chenodeoxycholic acid 24-acyl-b-D-glucuronide	232936	2.1138274	1.5002	0.557442	-0.975136	0.7213	0.8019
Eicosanoid_8,9-diHETrE [M-H+Acetate]	365688	1.5726193	1.1106	0.557442	0.728091	0.9279	0.8993
Novel EIC_13	426801	1.5292367	1.0800	0.557442	0.445924	1.1045	0.9514
VLCDCA_1	531896	-1.3170755	0.9362	0.557442	0.068428	1.0219	0.9983
VLCDCA_23	535937	-1.0992150	0.7782	0.557442	-1.123045	0.6832	0.7135
Eicosanoid_14,15 LTD4 [M-H+Acetate]	258994	1.0108718	0.7276	0.564573	0.875870	0.8916	0.8993
Eicosanoid_11t LTE4 [M-H+Acetate]	275412	1.1612646	0.8392	0.564573	1.413326	0.6779	0.6501
Eicosanoid_DHA [M-H+Acetate]	529467	0.9828162	0.7091	0.564573	1.015633	0.6204	0.7165
FFA_Pentadecanoic Acid† [M-H]	530326	-0.9863878	0.7116	0.564573	-0.366269	0.8119	0.9486
VLCDCA_17	532189	-1.2412355	0.8911	0.564573	-0.750022	0.9844	0.8993
VLCDCA_8	532895	-0.8253210	0.5965	0.564573	-1.168962	0.5289	0.6501
Eicosanoid_14,15 LTE4 [M-H]	233290	-0.8882036	0.6468	0.570238	0.931274	0.6067	0.7604
EIC_80	365075	1.4486084	1.0628	0.570238	0.622665	0.8923	0.9215
Putative_PGPC	447166	4.8527078	3.5516	0.570238	0.181872	0.9606	0.9828
Novel EIC_24	466757	1.3326655	0.9728	0.570238	-0.072299	1.1164	0.9983
Putative_N-Oleoyl-L-serine	522459	1.4109425	1.0350	0.570238	-1.966392	0.8070	0.5922
Polar Molecule_ELAIDATE [M-H+Acetate]	527688	1.2484499	0.9161	0.570238	1.237592	0.9147	0.8019
Novel EIC_14	448206	1.5354736	1.1434	0.583308	0.494365	0.9763	0.9486
EIC_318	136905	0.8016209	0.6021	0.585636	-0.271677	0.4768	0.9354
EIC_15	406050	1.3460757	1.0134	0.585636	0.196785	0.7329	0.9793
EIC_15	410919	-1.2692328	0.9542	0.585636	-1.224481	0.9516	0.8284
Eicosanoid_11(12)-EpETE [M-H]	421508	-1.3040362	0.9793	0.585636	-0.872645	0.9751	0.8993
Polar Molecule_PALMITATE [M-H+Acetate]	527462	1.4654227	1.1012	0.585636	1.126662	1.1887	0.8993
Putative_Androsterone glucuronide	172624	2.9677778	2.2428	0.588379	-1.821525	0.9064	0.6501
EIC_62	269687	1.2690296	0.9653	0.589726	0.042778	0.5430	0.9983
EIC_189	392686	0.8704410	0.6619	0.589726	0.853573	0.5794	0.7604
FAHFA_18	522272	-1.0887484	0.8275	0.589726	0.772150	0.8517	0.8993
EIC_250	199108	-0.8547977	0.6579	0.597663	0.207761	0.5796	0.9619
EIC_329	263763	0.7964470	0.6114	0.597663	0.434994	0.6520	0.9354
Eicosanoid_13(S) HOTrE(y) [M-H]	373917	1.4386823	1.1190	0.597663	-1.297080	0.8294	0.7499
EIC_31	407392	1.0682757	0.8310	0.597663	1.451634	0.7733	0.6586
EIC_10	432853	-0.7524524	0.5794	0.597663	0.404200	0.5292	0.8993
Polar Molecule_GAMMA-LINOLENATE [M-H+Acetate]	518129	5.8805253	4.5750	0.597663	3.391150	3.3587	0.8993
FFA_Heptadecaenoic Acid† [M-H+Acetate]	532124	1.2207240	0.9428	0.597663	1.600863	0.9105	0.6924
FAHFA_69	545400	1.6911824	1.3123	0.597663	-0.326611	1.0826	0.9793
Putative_1a-Methyl-5a-androstan-3a,17b-diol glucuronide	96184	1.2939040	0.9976	0.597663	0.329507	1.0637	0.9793
Putative_6-((E)-2-((1R,2S,3R,5S)-3,5-Dihydroxy-2-((Z)-oct-2-enyl)cyclopentyl)vinyl)tetrahydro-2H-pyran-2-one	167035	-0.9653400	0.7630	0.608973	0.077337	0.5097	0.9849
Eicosanoid_13,14-dihydro-PGE1 [M-H]	195187	-0.9063339	0.7158	0.608973	0.604284	0.6590	0.8993
Docosanoid_7(S),17(S)-hydroxy DPA [M-H+Acetate]	263855	0.9842034	0.7764	0.608973	-0.440241	0.6773	0.9354
EIC_101	433368	0.9023110	0.7122	0.608973	0.279402	0.6001	0.9486
Eicosanoid_PDX [M-H+Acetate]	282516	1.0459235	0.8312	0.611336	0.758889	0.8213	0.8993
EIC_251	291460	5.2056734	4.1631	0.611336	2.823020	3.6366	0.8993
Eicosanoid_EPA [M-H+Acetate]	523035	0.7500118	0.5997	0.611336	0.470494	0.5667	0.8993
FFA_Heptadecaenoic Acid† [M-H+Acetate]	529424	-0.9425047	0.7523	0.611336	-0.066579	0.6783	0.9983
FAHFA_59	532202	-1.1767484	0.9414	0.611336	-0.488513	0.8155	0.9354
FFA_Palmitic Acid† [M-H+Acetate]	534889	0.9460100	0.7575	0.611336	0.706219	0.8526	0.8993
Eicosanoid_19(R)-HETE [M-H]	367701	0.7553184	0.6088	0.617638	0.252125	0.5442	0.9486
EIC_156	253384	1.0260262	0.8303	0.620284	0.852746	1.0154	0.8993
EIC_156	264493	0.8511849	0.6929	0.625706	0.354787	0.6353	0.9379
FFA_Stearic Acid† [M-H]	533317	1.1081238	0.9069	0.629968	0.790089	0.7664	0.8993
VLCDCA_34	544601	-0.6349784	0.5206	0.629968	-1.191141	0.4778	0.5922
EIC_225	266128	-0.9944464	0.8188	0.633195	1.044786	0.6861	0.7604
EIC_182	323049	1.2937612	1.0729	0.640012	0.401984	0.8587	0.9486
VLCDCA_14	540389	1.9270687	1.6101	0.647258	-1.395261	1.0599	0.8194
Eicosanoid_5,6-EET [M-H]	467558	-0.9696421	0.8185	0.658161	0.028393	0.5911	0.9984
EIC_205	212224	0.8163949	0.6906	0.658284	0.302190	0.4676	0.9354
Eicosanoid_13,14-dihydro-15-keto-tetranor-PGF1alpha [M-H+Acetate]	125021	0.8840080	0.7574	0.659266	1.261457	0.6264	0.6501
EIC_314	153636	-1.6703273	1.4678	0.659266	-1.954115	2.2138	0.8993
Putative_7-Keto-3a,12-a-dihydroxycholanic acid	173610	1.1406494	0.9770	0.659266	1.176165	0.7792	0.7604
Eicosanoid_13,14-dihydro-PGE1 [M-H]	189965	-1.0925650	0.9549	0.659266	-1.405603	0.9424	0.7604
Eicosanoid_13,14-dihydro-PGF1a [M-H]	190593	-1.6256736	1.4242	0.659266	-0.015384	0.7397	0.9985
Putative_7a,17a-Dimethyl-5b-androstane-3a,17b-diol glucuronide	199356	-1.8465046	1.6155	0.659266	-2.279455	2.1162	0.8993
Putative_7a,17a-Dimethyl-5b-androstane-3a,17b-diol glucuronide	210760	-1.3900923	1.2302	0.659266	-1.302695	1.6498	0.8993
EIC_178	244703	0.6520150	0.5706	0.659266	-0.001105	0.5912	0.9985
Putative_11a-Hydroxyprogesterone b-D-glucuronide	282628	-1.0885928	0.9428	0.659266	-0.663014	0.8887	0.9022
EIC_71	305288	1.5060317	1.2869	0.659266	-1.930202	1.1638	0.7132
Eicosanoid_13(S) HOTrE [M-H+Acetate]	365619	1.0857983	0.9443	0.659266	-0.055933	0.9287	0.9983
EIC_189	386159	1.2640345	1.0987	0.659266	0.452548	0.9658	0.9486
Putative_4-[5-[[4-[5-[acetyl(hydroxy)amino]pentylamino]-4-oxobutanoyl]-hydroxyamino]pentylamino]-4-oxobutanoic acid	390962	-0.8804791	0.7589	0.659266	0.554758	0.7162	0.8993
EIC_86	450186	-0.5385026	0.4743	0.659266	-0.935334	0.5628	0.7132
Putative_1-Stearoyl-2-hydroxy-sn-glycero-3-phosphoethanolamine	521802	0.7822779	0.6729	0.659266	0.346875	0.5951	0.9354
FAHFA_11	521853	-1.2606071	1.0902	0.659266	-1.192178	1.2996	0.8993
FFA_a-linolenic Acid† [M-H]	527674	0.9437758	0.8285	0.659266	0.310468	0.7528	0.9486
Eicosanoid_Adrenic Acid [M-H]	530967	-0.8276302	0.7146	0.659266	0.591920	0.6832	0.8993
VLCDCA_23	533191	-0.9313846	0.8154	0.659266	0.165736	0.6835	0.9793
VLCDCA_1	533929	0.8096063	0.7166	0.659266	-0.589391	0.6937	0.8993
Polar Molecule_NERVONATE [M-H+Acetate]	536198	1.2215608	1.0799	0.659266	-1.429006	0.7340	0.6501
VLCDCA_28	542127	0.8743189	0.7492	0.659266	0.072605	0.6801	0.9938
Putative_2a-Methyl-5a-androstan-3a-ol-17-one glucuronide	98088	0.9852114	0.8356	0.659266	0.145303	0.8077	0.9830
Eicosanoid_15k PGF2a [M-H+Acetate]	109511	0.7843181	0.7012	0.659272	0.536304	0.6350	0.8993
Polar Molecule_CORTEXOLONE [M-H+Acetate]	159612	-0.6872572	0.6146	0.659272	-1.163747	0.5870	0.6501
EIC_58	342155	2.0817516	1.8663	0.659272	-1.239720	1.5314	0.8993
Eicosanoid_15S-HpETE [M-H]	413128	0.8472898	0.7544	0.659272	-0.985506	0.6364	0.7597
EIC_110	437709	1.0318350	0.9170	0.659272	0.316711	1.0859	0.9793
Bile Acid_Lithocholic Acid [M-H+Acetate]	441749	-1.0635412	0.9541	0.659272	-0.948734	0.8099	0.8773
Eicosanoid_EPA [M-H]	523009	0.6516187	0.5844	0.659272	0.259216	0.5435	0.9486
Putative_5a-Androstan-3a,17b-diol-17b-glucuronide	157904	-0.8003104	0.7218	0.660482	-1.013179	0.5755	0.6924
EIC_224	295140	0.7579406	0.6822	0.660482	-0.567698	0.5931	0.8993
FAHFA_21	526086	-0.9441883	0.8528	0.660482	0.030438	0.6687	0.9984
Eicosanoid_14,15 LTC4 [M-H]	264928	1.8289038	1.6623	0.665564	2.870299	1.7379	0.7135
Putative_1-Stearoyl-2-hydroxy-sn-glycero-3-phosphoethanolamine	525188	0.7458031	0.6812	0.667974	0.387932	0.6734	0.9354
EIC_188	171462	-0.7953420	0.7329	0.671475	-1.051501	0.5976	0.6924
Eicosanoid_tetranor 12(R) HETE [M-H]	322224	0.8132655	0.7516	0.671475	-0.282438	0.7358	0.9584
Eicosanoid_18(+/-)-HETE [M-H+Acetate]	377399	-0.7590792	0.7002	0.671475	0.260539	0.5710	0.9486
VLCDCA_1	534965	1.2510828	1.1508	0.671475	0.041007	1.0376	0.9985
EIC_205	208847	0.7506371	0.6987	0.675303	-0.044907	0.5538	0.9983
Putative_Monolinolenin (9c,12c,15c)	341483	-0.5672209	0.5271	0.675303	0.563835	0.4996	0.8993
Putative_Chenodeoxycholic acid 24-acyl-b-D-glucuronide	242299	1.9006466	1.7836	0.682343	-0.774360	0.8364	0.8993
Novel EIC_10	347387	0.8011838	0.7565	0.687175	-0.157510	0.6805	0.9793
Eicosanoid_13,14-dihydro-15-keto-tetranor-PGF1alpha [M-H+Acetate]	129125	0.7544047	0.7142	0.687835	1.916762	0.6240	0.5922
FAHFA_29	529339	0.7048997	0.6748	0.693826	-0.542805	0.7088	0.8993
FFA_Oleic Acid† [M-H]	535786	-0.7954160	0.7615	0.693826	0.350485	0.7295	0.9486
Putative_Oxymorphone 3-b-D-glucuronide	90626	-1.5652211	1.4969	0.693826	1.660140	1.1298	0.7604
VLCDCA_6	532891	-1.1707241	1.1291	0.699833	-1.075204	1.0621	0.8993
EIC_137	228394	0.6284838	0.6088	0.700241	-0.048304	0.5838	0.9983
VLCDCA_45	534494	-0.8461441	0.8185	0.700241	-0.991888	0.9016	0.8993
Eicosanoid_18(+/-)-HETE [M-H+Acetate]	374735	-0.9863767	0.9585	0.701554	-1.735277	1.6271	0.8993
EIC_109	403246	-4.8391698	4.7333	0.706579	-0.367400	4.5740	0.9983
Putative_7a,17a-Dimethyl-5b-androstane-3a,17b-diol glucuronide	203097	-1.9224035	1.8853	0.707250	-1.148800	1.9321	0.9354
Eicosanoid_13(S) HOTrE(y) [M-H]	378072	1.2007111	1.1852	0.709888	0.105231	0.6858	0.9849
Endocannabinoid_Arachidonoyl Ethanolamide [M-H+Acetate]	479677	-0.6232740	0.6151	0.709888	0.407802	0.6933	0.9354
EIC_232	222789	0.7866239	0.7783	0.710325	0.803806	0.7442	0.8993
Endocannabinoid_N-arachidonoyl Dopamine [M-H+Acetate]	518573	-0.7267909	0.7207	0.710503	0.460371	0.6260	0.9053
Docosanoid_Resolvin E1 [M-H+Acetate]	110221	0.7320188	0.7278	0.710828	0.368524	0.6056	0.9354
Eicosanoid_12S-HpETE [M-H]	430722	-1.1601800	1.1579	0.710828	-2.121868	0.8839	0.5922
Putative_N-Oleoyl-L-serine	517674	0.7033586	0.7008	0.710828	0.422243	0.7085	0.9354
Polar Molecule_TRICOSANOATE [M-H]	540604	0.6927246	0.6933	0.711680	-0.993391	0.4804	0.6501
Putative_2-Hydroxypalmitic acid	521349	-0.6141946	0.6164	0.712325	1.531262	0.6214	0.5922
EIC_178	251262	-2.7078785	2.7310	0.714202	0.075891	2.8436	0.9985
VLCDCA_11	533173	-0.8397695	0.8477	0.714202	0.109245	0.7028	0.9849
VLCDCA_26	535393	-0.7465313	0.7559	0.715411	-1.086599	0.7142	0.7604
EIC_124	238208	0.7376851	0.7504	0.715890	-0.055362	0.7069	0.9983
FFA_Myristic Acid [M-H]	520512	1.0489844	1.0671	0.715890	-2.006913	1.2178	0.7135
Eicosanoid_11-dehydro-2,3-dinor-TXB2 [M-H+Acetate]	128452	0.7831545	0.7989	0.716661	-0.383497	0.7574	0.9486
EIC_88	373969	0.9532712	0.9747	0.716962	0.482091	0.8242	0.9354
EIC_111	454288	-0.6755912	0.7071	0.739314	0.694822	0.8177	0.8993
Bile Acid_Glycoursodeoxycholic Acid [M-H+Acetate]	181294	-0.8417888	0.8831	0.739628	-0.184948	0.5860	0.9781
VLCDCA_34	539456	-0.7048827	0.7434	0.742900	-0.640806	0.6972	0.8993
EIC_150	301803	0.5317925	0.5650	0.747511	0.231727	0.6213	0.9584
FFA_Linoleic Acid† [M-H+Acetate]	528408	0.9492172	1.0120	0.747511	2.359908	1.0910	0.6501
VLCDCA_38	530224	-0.7264205	0.7744	0.747511	-0.825678	0.7216	0.8993
Putative_2-Hydroxypalmitic acid	518068	-0.6879019	0.7402	0.750324	-0.452807	0.6800	0.9354
FFA_a-linolenic Acid† [M-H]	521670	-0.7841594	0.8419	0.750324	-0.179973	0.9253	0.9828
FFA_Eicosenoic Acid [M-H]	531994	-0.7249838	0.7795	0.750324	-0.289485	0.8698	0.9734
EIC_169	349398	0.8133141	0.8833	0.755272	0.870607	0.6607	0.8194
FAHFA_28	527378	0.6170781	0.6693	0.755272	1.353986	0.7187	0.6586
EIC_31	411585	-0.7721704	0.8405	0.755423	-1.013399	0.8886	0.8993
Putative_Monolinolenin (9c,12c,15c)	343482	0.6455226	0.7069	0.759191	0.850225	0.6198	0.8019
Eicosanoid_13,14-dihydro-15-keto-tetranor-PGD2 [M-H+Acetate]	125018	-0.7185388	0.7970	0.765295	0.080697	0.6569	0.9872
FFA_Heptadecaenoic Acid† [M-H]	531845	-0.5840180	0.6485	0.765295	-0.263380	0.7093	0.9584
VLCDCA_17	532515	-0.6332031	0.7038	0.765295	-0.908033	0.7754	0.8773
VLCDCA_17	534730	-0.8619829	0.9538	0.765295	0.209063	0.9230	0.9793
EIC_205	215007	0.6180794	0.7043	0.766516	-0.030951	0.5705	0.9984
Eicosanoid_15-epi-PGA1 [M-H+Acetate]	244131	0.7277508	0.8153	0.766516	0.284567	0.7569	0.9584
EIC_322	266179	0.5360838	0.6120	0.766516	-0.893064	0.5063	0.6924
Eicosanoid_tetranor 12(R) HETE [M-H]	331464	0.7050005	0.7901	0.766516	-0.548272	0.7440	0.9053
EIC_29	354579	1.0828304	1.2464	0.766516	0.412419	0.6945	0.9354
EIC_105	382736	0.5510696	0.6353	0.766516	0.721043	0.5780	0.8470
Polar Molecule_N-ACETYLTRYPTOPHAN [M-H]	45049	0.7010518	0.8068	0.766516	-1.524592	0.7625	0.6501
Polar Molecule_LUMICHROME [M-H]	51894	0.8701651	0.9934	0.766516	-0.424521	0.7433	0.9354
Endocannabinoid_Oleoyl Ethanolamide [M-H+Acetate]	520172	-0.9532183	1.0994	0.766516	-3.043999	1.7271	0.6924
Endocannabinoid_2-Arachidonyl glycerol ether [M-H+Acetate]	526318	-0.8407253	0.9650	0.766516	0.225663	1.0650	0.9793
FFA_Linoleic Acid† [M-H+Acetate]	526555	1.3787690	1.5887	0.766516	0.368063	1.6877	0.9793
FAHFA_48	529646	0.8257385	0.9326	0.766516	0.933687	1.0077	0.8993
FFA_Oleic Acid† [M-H+Acetate]	531868	0.7276004	0.8345	0.766516	1.450500	0.7533	0.6586
Eicosanoid_Arachidonic Acid [M-H+Acetate]	531873	0.8490807	0.9702	0.766516	1.837572	0.8804	0.6501
VLCDCA_1	532475	-0.6981665	0.7979	0.766516	-0.627042	0.6854	0.8993
FFA_Heptadecanoic Acid† [M-H+Acetate]	534900	0.8153618	0.9494	0.773368	0.732066	0.9462	0.8993
EIC_125	190567	0.9288428	1.1018	0.779980	0.533652	1.2370	0.9486
Eicosanoid_7,17 dhDPA [M-H+Acetate]	286064	-0.4400067	0.5190	0.779980	-0.711023	0.4205	0.7024
EIC_157	292929	0.7771798	0.9193	0.779980	-0.600511	0.7384	0.8993
Eicosanoid_tetranor-PGFM [M-H]	29345	-0.6934161	0.8220	0.779980	-0.323204	0.7541	0.9486
FAHFA_48	528338	0.6896365	0.8116	0.779980	1.689208	0.7932	0.6501
Bile Acid_Glycoursodeoxycholic Acid [M-H]	166774	0.7690708	0.9234	0.789017	-0.630204	0.6853	0.8993
EIC_343	395749	1.0163958	1.2377	0.793505	-2.485336	1.2440	0.6501
Eicosanoid_11(12)-EpETE [M-H+Acetate]	421573	-0.8057506	0.9791	0.793505	-0.661868	0.7855	0.8993
FFA_Oleic Acid† [M-H]	531847	0.6929913	0.8441	0.793505	1.161831	0.7291	0.7499
FFA_Arachidic Acid† [M-H]	541489	0.6670364	0.8124	0.793505	-0.676222	0.6811	0.8993
Polar Molecule_PALMITATE [M-H+Acetate]	529748	0.6236361	0.7622	0.794419	-0.553053	0.6413	0.8993
Eicosanoid_PGF1a [M-H]	171489	-0.6819068	0.8480	0.807771	0.154751	0.7093	0.9793
Eicosanoid_14,15-diHETrE [M-H+Acetate]	323938	1.4007721	1.7630	0.816279	0.120927	1.4622	0.9983
Putative_1a-Methyl-5a-androstan-3a,17b-diol glucuronide	100107	-0.5633359	0.7111	0.816778	-0.329334	0.6817	0.9486
EIC_250	195182	-0.5254676	0.6682	0.820585	0.036291	0.6090	0.9983
Putative_3-Hydroxystanozolol glucuronide	271639	-0.8231946	1.0567	0.820585	0.766291	0.9746	0.8993
EIC_189	389030	-0.5516163	0.7071	0.820585	0.161416	0.7254	0.9793
FFA_Heptadecanoic Acid† [M-H+Acetate]	534128	0.5114048	0.6563	0.820585	0.727815	0.8064	0.8993
Putative_1a-Methyl-5a-androstan-3a,17b-diol glucuronide	108971	0.5660831	0.7362	0.822838	-0.148303	0.8501	0.9849
FFA_a-linolenic Acid† [M-H]	523928	-0.5355238	0.6930	0.822838	0.186467	0.7310	0.9793
FFA_Dihomo-g-linolenic† [M-H]	530664	-0.4445543	0.5807	0.822838	0.551317	0.6849	0.8993
FAHFA_57	531915	1.4169437	1.8493	0.822838	2.017038	1.5403	0.8203
FFA_Eicosadienoic Acid† [M-H]	531992	-0.4702181	0.6128	0.822838	0.667093	0.6220	0.8993
FFA_Docosadienoic Acid† [M-H]	534554	0.5622296	0.7346	0.822838	1.051795	0.8589	0.8543
EIC_26	441431	0.6241121	0.8208	0.824176	0.280242	0.7704	0.9605
Eicosanoid_5,6-EET [M-H]	473277	0.5152530	0.6762	0.824176	0.398621	0.6854	0.9354
Polar Molecule_Tetrahydrocortisol [M-H+Acetate]	138195	0.4970642	0.6632	0.825667	-0.035716	0.6780	0.9984
Sterol_11-Deoxycorticosterone [M-H+Acetate]	228510	-0.4756548	0.6363	0.825667	0.494657	0.6362	0.8993
EIC_91	326677	-0.6966100	0.9291	0.825667	-1.552000	0.7428	0.6501
Eicosanoid_10-Nitrooleate [M-H]	510123	0.4369702	0.5796	0.825667	0.307743	0.5440	0.9362
FFA_Eicosadienoic Acid† [M-H+Acetate]	531329	1.2732984	1.6833	0.825667	2.620242	1.7109	0.7604
EIC_1	310243	-0.9326898	1.2591	0.831016	-1.382210	1.5254	0.8993
Eicosanoid_PGF1a [M-H]	167096	-0.5586455	0.7566	0.831569	0.460437	0.4900	0.8993
Novel EIC_35	134247	0.4322615	0.5942	0.836771	-0.496063	0.7653	0.9354
Putative_5a-Androstan-3a,17b-diol-17b-glucuronide	150234	-0.6606473	0.9100	0.836771	-0.594360	0.7748	0.8993
Eicosanoid_11-HETE [M-H+Acetate]	423143	0.6044468	0.8391	0.840911	-0.783257	0.7089	0.8993
EIC_55	297605	0.5522756	0.7718	0.841963	0.037255	0.7829	0.9984
Putative_Bilirubin	528314	-0.6260513	0.8747	0.841963	0.377853	0.6649	0.9354
Putative_Hydrocortisone	107173	0.3903386	0.5679	0.845884	-1.070034	0.4961	0.6501
Eicosanoid_11-dehydro-2,3-dinor-TXB2 [M-H+Acetate]	143490	-0.5075533	0.7274	0.845884	0.050253	0.7652	0.9983
Eicosanoid_11-dehydro-TXB3 [M-H+Acetate]	146386	-0.3148858	0.4673	0.845884	0.344269	0.4161	0.8993
Putative_5a-Androstan-3a,17b-diol-17b-glucuronide	159009	-0.6423082	0.9098	0.845884	-0.709265	0.8812	0.8993
Putative_5a-Androstan-17b-ol-3-one glucosiduronate	201784	-1.0950991	1.5907	0.845884	0.001937	0.9774	0.9985
Docosanoid_MCTR2 [M-H]	208505	0.5833184	0.8669	0.845884	1.079555	0.7489	0.7812
EIC_139	211121	0.7210156	1.0596	0.845884	-1.025609	0.9131	0.8993
Bile Acid_Ursodeoxycholic acid [M-H]	245404	-0.9434737	1.3823	0.845884	-2.048472	1.4183	0.7812
EIC_178	245971	-1.5550626	2.2113	0.845884	-1.443419	1.5198	0.8993
Bile Acid_Chenodeoxycholic acid [M-H+Acetate]	329139	1.4944310	2.2217	0.845884	-0.837578	1.9328	0.9486
Novel EIC_3	375923	-0.7181818	1.0625	0.845884	-0.925429	0.8461	0.8993
Eicosanoid_13-oxoODE [M-H+Acetate]	408537	-0.6449973	0.9250	0.845884	0.008698	0.9593	0.9985
Eicosanoid_12-HETE [M-H+Acetate]	425444	0.6627129	0.9607	0.845884	-0.444269	0.9187	0.9486
EIC_77	435704	0.7182468	1.0287	0.845884	-0.141838	1.0028	0.9850
Eicosanoid_5,6-EET [M-H]	469222	-0.4264356	0.6207	0.845884	0.480148	0.5774	0.8993
FAHFA_11	520688	0.5260775	0.7578	0.845884	0.016960	0.8038	0.9985
Docosanoid_osbond acid, all-cis-4,7,10,13,16-DPA [M-H]	528114	-0.4542221	0.6561	0.845884	1.684199	0.6172	0.5922
FFA_Pentadecanoic Acid† [M-H+Acetate]	531478	-0.6369732	0.9266	0.845884	0.546387	1.0545	0.9486
FFA_Arachidic Acid† [M-H]	536380	0.7455881	1.0781	0.845884	-0.857142	1.0980	0.8993
Bile Acid_Glycochenodeoxycholic Acid [M-H]	251495	2.2882137	3.4275	0.849306	-2.069054	0.7897	0.5922
EIC_191	412743	0.4958256	0.7530	0.849422	0.240555	0.5965	0.9514
Putative_N-oleoyl taurine	497820	-0.4243412	0.6418	0.849422	-0.178671	0.5894	0.9793
Endocannabinoid_N-oleoyl Dopamine [M-H]	528189	-0.5110042	0.7755	0.849422	0.047090	0.8495	0.9984
FFA_Docosaenoic Acid† [M-H+Acetate]	535281	0.6666386	1.0042	0.849422	0.700447	0.9168	0.8993
Polar Molecule_NERVONATE [M-H]	537448	0.5881079	0.8934	0.849422	1.304614	0.8522	0.7604
EIC_9	408763	-0.5446413	0.8397	0.857788	-0.677507	0.8917	0.8993
Polar Molecule_CORTISONE [M-H+Acetate]	112455	-0.4001823	0.6246	0.858171	0.054296	0.5662	0.9983
Eicosanoid_12-HHTrE [M-H+Acetate]	332750	-1.9153963	2.9755	0.858171	-0.467805	3.0089	0.9849
EIC_14	387514	0.7510528	1.1759	0.858171	-2.024528	0.9079	0.6501
Endocannabinoid_N-arachidonoyl Dopamine [M-H]	515028	-0.5138623	0.8037	0.858171	0.408792	0.8706	0.9486
VLCDCA_15	533973	0.5339510	0.8379	0.858171	-0.168572	0.7593	0.9793
FFA_Eicosenoic Acid [M-H]	539066	-0.4312501	0.6679	0.858171	0.645955	0.6766	0.8993
Novel EIC_6	234484	-0.3582195	0.5680	0.861223	0.233412	0.5146	0.9486
Eicosanoid_15S-HpETE [M-H]	407687	0.5200742	0.8226	0.861223	0.702211	0.7210	0.8993
EIC_83	335777	0.6082148	0.9683	0.862022	-1.330764	1.2378	0.8993
Eicosanoid_12-oxoETE [M-H]	423400	-0.4362825	0.7038	0.868840	0.201544	0.7340	0.9793
EIC_229	199695	-0.3970345	0.6664	0.886956	-0.059570	0.4912	0.9872
EIC_122	358178	0.6226477	1.0421	0.886956	-0.841263	0.9680	0.8993
Endocannabinoid_D-erythro-Sphingosine C-18 [M-H+Acetate]	518988	-0.4654034	0.7862	0.886956	-0.213150	0.8535	0.9793
Eicosanoid_DHA [M-H]	525743	-0.4030540	0.6796	0.886956	0.350298	0.7135	0.9486
Eicosanoid_Arachidonic Acid [M-H]	527450	0.3912963	0.6557	0.886956	1.444299	0.6255	0.6501
Endocannabinoid_N-oleoyl Dopamine [M-H]	529004	0.4858355	0.8173	0.886956	0.696760	0.7896	0.8993
Eicosanoid_Adrenic Acid [M-H]	532126	-0.4259219	0.7243	0.887906	0.295668	0.7938	0.9584
VLCDCA_11	534221	0.4580681	0.7798	0.887906	-0.540622	0.6845	0.8993
Eicosanoid_5S-HpEPE [M-H+Acetate]	402588	-0.4341672	0.7443	0.890309	-0.995142	0.6979	0.7812
Eicosanoid_5,6-EET [M-H+Acetate]	470913	0.6318421	1.0931	0.894007	-0.872280	0.7959	0.8993
Bile Acid_Ursodeoxycholic acid [M-H+Acetate]	232137	0.5759027	1.0047	0.897168	0.702712	1.0012	0.9215
EIC_135	316724	0.5745500	1.0074	0.898278	-0.742207	1.0041	0.9053
Eicosanoid_PGF1a [M-H]	164760	0.3407307	0.6017	0.898631	-0.008152	0.5659	0.9985
EIC_189	381176	0.4016132	0.7091	0.898631	0.322178	0.6711	0.9486
EIC_250	186140	0.4815722	0.8640	0.898950	0.140231	0.7399	0.9828
EIC_177	274066	-0.6139670	1.0993	0.898950	0.225730	0.8274	0.9793
EIC_87	390659	-0.4212323	0.7500	0.898950	-0.257368	0.6284	0.9486
VLCDCA_32	537601	-0.4726215	0.8406	0.898950	-0.658565	0.7159	0.8993
VLCDCA_14	541584	0.7319517	1.3144	0.898950	-0.350845	0.8818	0.9542
Eicosanoid_15d PGJ2 [M-H]	364658	-0.4902642	0.8838	0.899248	1.583790	0.8506	0.6586
Polar Molecule_allo-Tetrahydrocortisol [M-H+Acetate]	97322	-0.5562817	1.0064	0.899441	0.452453	0.7281	0.9354
EIC_354	155807	0.4907307	0.8938	0.901419	-0.750360	0.9639	0.8993
EIC_177	263648	0.4775594	0.8734	0.901888	0.141653	0.7474	0.9828
Polar Molecule_CORTISONE [M-H]	112369	-0.3031225	0.5725	0.905711	0.125230	0.5212	0.9793
Bile Acid_Glycochenodeoxycholic Acid [M-H]	247605	0.6190663	1.1604	0.905711	-1.551357	0.7917	0.6501
Polar Molecule_THYMIDINE-MONOPHOSPHATE [M-H+Acetate]	35550	-0.3942258	0.7383	0.905711	-1.718018	0.7912	0.6501
EIC_185	397724	-0.4066917	0.7567	0.905711	-0.153110	0.6909	0.9793
EIC_104	401285	0.4647160	0.8748	0.905711	0.093073	0.6544	0.9850
FFA_Docosaenoic Acid† [M-H]	535834	0.6620554	1.2489	0.905711	-1.449496	1.0756	0.8019
VLCDCA_42	540422	0.4109855	0.7775	0.905711	-0.500110	0.7055	0.9198
EIC_144	256466	0.4531373	0.8696	0.911709	-0.303910	0.9548	0.9772
Novel EIC_13	423715	-0.3730928	0.7239	0.914030	-0.305349	0.8139	0.9584
FFA_Tricosenoic Acid [M-H+Acetate]	537869	0.4213243	0.8177	0.914030	0.357677	0.5341	0.9354
Polar Molecule_CORTISOL [M-H]	111875	0.5017985	0.9934	0.920497	-1.152152	0.8111	0.7812
Novel EIC_1	405831	0.4225282	0.8400	0.920497	0.556121	0.7821	0.9198
Eicosanoid_DHA [M-H]	523275	0.5671076	1.1273	0.920497	0.189027	1.2218	0.9849
VLCDCA_6	534200	0.3991929	0.7955	0.920497	-0.253026	0.7117	0.9619
FFA_Stearic Acid† [M-H+Acetate]	533106	0.3803451	0.7680	0.925495	-0.053082	0.7430	0.9983
Bile Acid_Ursodeoxycholic acid [M-H]	232041	0.5325187	1.0834	0.925970	0.557389	1.0855	0.9486
Eicosanoid_15d PGJ2 [M-H]	364207	-0.3390432	0.6903	0.925970	0.239786	0.5784	0.9486
FFA_a-linolenic Acid† [M-H+Acetate]	520570	0.3727495	0.7687	0.930582	0.174302	0.6664	0.9793
Putative_Hydrocortisone 21-hemisuccinate	111837	0.4325237	0.9028	0.932903	-1.042284	0.7704	0.8019
FFA_Tricosenoic Acid [M-H+Acetate]	536191	0.3639849	0.7569	0.932903	0.498249	0.5979	0.8993
Putative_Codeine-6-b-D-glucuronide	119896	0.9211854	1.9308	0.933073	2.590113	1.9298	0.8019
Novel EIC_6	229056	0.3130239	0.6716	0.935829	-0.717005	0.6104	0.8773
Eicosanoid_17,18-DiHETE [M-H+Acetate]	268636	-0.2998957	0.6569	0.935829	-0.136327	0.6673	0.9828
EIC_338	297072	0.3446490	0.7491	0.935829	1.655518	0.6813	0.5922
Eicosanoid_11(12)-EpETE [M-H]	416960	0.2848938	0.6211	0.935829	0.396530	0.4930	0.8993
FFA_Myristic Acid [M-H]	524668	0.3789131	0.8304	0.935829	0.284375	0.8358	0.9703
Putative_1-Arachidoyl-2-hydroxy-sn-glycero-3-phosphocholine	525258	0.2916925	0.6252	0.935829	0.168503	0.7893	0.9793
FFA_Adrenic Acid† [M-H]	528116	-0.3372557	0.7325	0.935829	1.647483	0.6748	0.5922
Polar Molecule_VITAMIN D2 [M-H]	531344	0.3607469	0.7876	0.935829	0.744291	0.8565	0.8993
FFA_Linoleic Acid† [M-H]	532109	-0.3811333	0.8306	0.935829	0.025723	0.8282	0.9985
FFA_Eicosatrienoic Acid† [M-H+Acetate]	534431	0.3281971	0.7142	0.935829	1.191084	0.7647	0.7528
Eicosanoid_15-epi-PGA1 [M-H+Acetate]	248240	0.3730215	0.8233	0.937253	0.419389	0.8138	0.9486
Bile Acid_Glycoursodeoxycholic Acid [M-H]	173155	0.8100566	1.8008	0.937465	-0.683959	1.4133	0.9486
EIC_146	239745	0.2595475	0.5777	0.937465	-0.224524	0.4452	0.9486
Polar Molecule_CORTISOL [M-H+Acetate]	100025	0.2573442	0.6170	0.937593	-0.732567	0.5017	0.7683
Polar Molecule_CORTISOL [M-H+Acetate]	111953	0.3819355	0.9489	0.937593	-1.171367	0.7813	0.7604
Polar Molecule_Tetrahydrocortisol [M-H+Acetate]	123097	-0.3890010	0.8931	0.937593	-0.803263	0.8419	0.8993
Putative_4-Androsten-17b-ol-3-one glucosiduronate	153131	0.3760460	1.0412	0.937593	0.335803	0.8131	0.9486
Sterol_11-keto-testosterone [M-H+Acetate]	157340	-0.2967762	0.7819	0.937593	-0.484524	0.7274	0.9354
Putative_4-Androsten-17b-ol-3-one glucosiduronate	158439	0.3904248	0.9839	0.937593	0.878726	0.7004	0.8433
Novel EIC_40	183709	-0.2345663	0.6577	0.937593	-0.235092	0.6043	0.9584
EIC_229	184258	0.2133492	0.6251	0.937593	0.207636	0.5361	0.9584
EIC_138	191819	0.5808954	1.4192	0.937593	-0.194638	1.0799	0.9830
Sterol_Estrone [M-H+Acetate]	202817	0.7209464	1.9352	0.937593	0.456940	0.9627	0.9486
Novel EIC_6	233564	-0.2874783	0.8000	0.937593	1.396759	0.7168	0.6501
EIC_146	245286	-0.4083595	1.0422	0.937593	-0.164905	0.8367	0.9828
Eicosanoid_15-epi-PGA1 [M-H+Acetate]	253524	0.2336614	0.6671	0.937593	0.346480	0.5356	0.9354
EIC_177	262111	-0.2170836	0.5557	0.937593	-0.131289	0.5655	0.9793
EIC_358	264609	0.2918815	0.7396	0.937593	-0.284091	0.5974	0.9486
EIC_358	269922	-0.3080936	0.7893	0.937593	-0.942295	0.6263	0.7604
Docosanoid_7(S),17(S)-hydroxy DPA [M-H+Acetate]	283207	-0.3738121	0.9817	0.937593	-0.507422	0.8375	0.9354
EIC_271	297019	-0.3107726	0.6948	0.937593	0.266865	0.7512	0.9619
EIC_83	344675	0.2313071	0.5926	0.937593	0.134143	0.4955	0.9793
EIC_4	345300	-0.1983773	0.5302	0.937593	-0.312650	0.7184	0.9486
Eicosanoid_20cooh AA [M-H]	356342	0.2469283	0.6968	0.937593	-0.309930	0.5433	0.9354
Docosanoid_7,8-DiHDPA [M-H]	364273	-0.2586339	0.6748	0.937593	0.398032	0.5060	0.8993
EIC_122	365097	0.6005909	1.3703	0.937593	-1.053724	1.1301	0.8993
Eicosanoid_13(S) HOTrE(y) [M-H+Acetate]	377311	0.3241480	0.9441	0.937593	0.572453	0.9639	0.9354
Novel EIC_3	381111	0.2610791	0.7501	0.937593	-0.213030	0.6200	0.9699
EIC_15	409677	0.3174310	0.8466	0.937593	-1.718777	1.0226	0.7024
Novel EIC_18	420737	0.2677142	0.7048	0.937593	0.384867	0.5407	0.9198
EIC_10	440807	0.9887271	2.8945	0.937593	-0.592317	0.5884	0.8993
EIC_82	445680	-0.2677004	0.6195	0.937593	-0.088956	0.5365	0.9849
Novel EIC_33	460414	-0.4317403	1.1289	0.937593	0.758768	0.8272	0.8993
Eicosanoid_15 oxoEDE [M-H+Acetate]	474392	-0.3639383	0.8911	0.937593	0.076916	0.8300	0.9983
Eicosanoid_15 oxoEDE [M-H]	479072	0.2314826	0.6722	0.937593	-0.134277	0.6686	0.9828
FFA_Stearidonic Acid [M-H+Acetate]	487076	0.5526639	1.6136	0.937593	-1.738154	1.7433	0.8993
Polar Molecule_MYRISTATE [M-H]	519152	0.2756096	0.7296	0.937593	-0.281565	0.6740	0.9486
FAHFA_12	520493	-0.2185997	0.6008	0.937593	0.593313	0.6345	0.8993
FFA_a-linolenic Acid† [M-H]	520524	0.2958746	0.7081	0.937593	0.291309	0.6259	0.9486
Polar Molecule_PALMITOLEATE [M-H]	521338	-0.3482866	0.8909	0.937593	1.182245	0.8703	0.8019
FFA_Myristic Acid [M-H+Acetate]	524395	0.4327496	0.9776	0.937593	0.492825	1.0148	0.9486
Putative_Heneicosapentaenoic acid	524788	-0.4082281	0.9945	0.937593	1.213814	0.9298	0.8207
Eicosanoid_Arachidonic Acid [M-H]	525365	-0.2727481	0.7027	0.937593	0.005764	0.7438	0.9985
Polar Molecule_OLEOYL-GLYCEROL [M-H+Acetate]	527254	-0.2879698	0.8139	0.937593	0.270794	0.8476	0.9772
FAHFA_27	528052	-0.2698324	0.7267	0.937593	0.446616	0.7609	0.9354
Eicosanoid_Arachidonic Acid [M-H]	529143	0.1960185	0.5591	0.937593	1.403575	0.7162	0.6501
FFA_Palmitoleic Acid† [M-H+Acetate]	529152	-0.3388412	0.8564	0.937593	-0.853465	0.8787	0.8993
Endocannabinoid_Stearoyl Ethanolamide [M-H+Acetate]	530121	-0.3197096	0.8092	0.937593	-0.764493	0.6169	0.8470
FFA_Palmitic Acid† [M-H+Acetate]	531306	-0.3472177	0.9005	0.937593	0.338602	0.8240	0.9486
FFA_Palmitic Acid† [M-H+Acetate]	531996	0.2846989	0.6858	0.937593	0.523168	0.8407	0.9354
FFA_Docosatrienoic Acid† [M-H]	532415	-0.2881726	0.6882	0.937593	0.885247	0.7302	0.8543
FFA_Palmitic Acid† [M-H]	533569	-0.2561893	0.5849	0.937593	0.135625	0.6366	0.9793
FFA_Eicosenoic Acid [M-H]	534395	0.2501628	0.7149	0.937593	0.466469	0.7191	0.9354
FFA_Stearic Acid† [M-H+Acetate]	534421	0.3518685	0.8287	0.937593	0.752385	0.9835	0.8993
VLCDCA_12	535370	-0.2639660	0.7453	0.937593	-0.139343	0.8202	0.9849
FFA_Docosadienoic Acid† [M-H]	536158	-0.3946884	1.0386	0.937593	0.368282	0.8825	0.9486
VLCDCA_8	537536	0.3770532	0.9762	0.937593	-0.539797	0.8813	0.9354
VLCDCA_40	540421	-0.4248335	1.0709	0.937593	-1.826439	1.1566	0.7499
VLCDCA_44	547731	-0.3111903	0.8508	0.937593	-0.122444	0.7248	0.9849
Polar Molecule_LUMICHROME [M-H]	54898	0.8436121	2.1394	0.937593	-1.353938	0.7331	0.6586
Putative_2a-Methyl-5a-androstan-3a-ol-17-one glucuronide	92507	0.3759661	0.8626	0.937593	-0.233615	0.7187	0.9759
Putative_Codeine-6-b-D-glucuronide	111091	0.6541155	1.9380	0.938591	2.146680	1.8229	0.8773
EIC_224	298220	0.3362857	0.9984	0.938591	-0.764701	1.0272	0.9022
FAHFA_58	531777	0.5869208	1.7768	0.943169	1.321451	1.6262	0.8993
Putative_1-Palmitoyl-2-hydroxy-sn-glycero-3-phosphoethanolamine	452730	-0.4039238	1.2520	0.946641	-0.877714	1.0719	0.8993
EIC_122	368273	0.3445769	1.0809	0.946829	-0.432487	0.9479	0.9486
EIC_24	422518	-0.3725663	1.1787	0.946829	-1.069490	0.8607	0.8470
FFA_Arachidic Acid† [M-H]	535084	-0.2967883	0.9376	0.946829	-0.208477	0.9337	0.9793
Bile Acid_Lithocholic Acid [M-H]	442558	0.3364908	1.0777	0.948710	-0.734816	1.0244	0.9198
Endocannabinoid_Oleoyl Ethanolamide [M-H+Acetate]	522175	0.2199949	0.7136	0.948710	-0.120061	0.8660	0.9850
FAHFA_12	523559	-0.2929168	0.9452	0.948710	0.973704	0.9129	0.8993
VLCDCA_2	534195	0.2360106	0.7683	0.948710	-0.661157	0.6737	0.8993
EIC_356	208342	0.1917357	0.6375	0.951505	-0.491960	0.6883	0.9198
Putative_Decylbenzenesulfonic acid	418979	0.4299973	1.4241	0.951505	-1.198382	1.1277	0.8993
Novel EIC_35	136210	0.1672958	0.6493	0.957405	-0.969513	0.6444	0.7604
EIC_351	175055	0.1919941	0.6893	0.957405	-0.326010	0.5413	0.9354
EIC_333	191164	0.1905598	0.7078	0.957405	0.288233	0.6554	0.9486
EIC_205	221256	-0.1785696	0.6978	0.957405	-0.599874	0.6281	0.8993
EIC_143	315302	0.1761227	0.6794	0.957405	0.184598	0.5649	0.9759
Docosanoid_10,11-DiHDPA [M-H+Acetate]	346852	-0.2315925	0.8437	0.957405	-1.331872	0.6570	0.6501
EIC_58	348012	0.7760203	2.9921	0.957405	-0.671379	1.6178	0.9486
Docosanoid_7,8-DiHDPA [M-H+Acetate]	364346	-0.2395448	0.9381	0.957405	-0.332682	0.7284	0.9486
Putative_D-erythro-Sphingosine-1-phosphate	377404	-0.2263596	0.8365	0.957405	0.270134	0.5782	0.9486
EIC_106	378136	-0.3216903	1.2228	0.957405	-1.267743	0.9912	0.8301
Eicosanoid_12S-HpEPE [M-H]	382329	-0.1861144	0.6693	0.957405	-0.165013	0.6799	0.9793
EIC_185	397318	-0.2689204	1.0558	0.957405	-0.934338	0.6961	0.8019
EIC_185	398537	-0.2197996	0.7664	0.957405	-0.725510	0.6651	0.8993
Putative_Dodecylbenzenesulfonic acid	403895	0.2475346	0.9295	0.957405	-0.636835	0.8454	0.9014
Eicosanoid_14(15) EpETE [M-H]	408497	-0.1633358	0.5968	0.957405	0.378806	0.5090	0.9022
Eicosanoid_5(S) HETrE [M-H]	501853	0.1483248	0.5644	0.957405	1.204196	0.5505	0.6501
FAHFA_42	531450	-0.2243302	0.8035	0.957405	-0.177112	0.8235	0.9793
FFA_Heptadecaenoic Acid† [M-H+Acetate]	532672	-0.2444570	0.8777	0.957405	0.220111	1.0529	0.9803
VLCDCA_10	534972	0.2419480	0.8760	0.957405	-0.305633	0.7134	0.9486
VLCDCA_14	537555	-0.2444450	0.9339	0.957405	-0.632955	0.7586	0.8993
VLCDCA_34	537603	-0.1914996	0.6705	0.957405	-0.648329	0.6275	0.8993
Eicosanoid_8-iso-15-keto-PGE2 [M-H+Acetate]	178102	-0.1459600	0.6121	0.957679	0.001299	0.6140	0.9985
EIC_138	201561	-0.2094494	0.8736	0.957679	-0.392445	0.7242	0.9486
EIC_209	228440	-0.1406560	0.5709	0.957679	-0.443628	0.4564	0.8993
EIC_257	249793	-0.1684441	0.7205	0.957679	-0.183941	0.7457	0.9793
Putative_a-Hyodeoxycholic acid methyl ester	343493	-0.2115333	0.8813	0.957679	-0.734177	0.6972	0.8993
EIC_87	387542	0.1572082	0.6703	0.957679	-0.239141	0.6442	0.9584
EIC_15	412685	-0.2376830	0.9524	0.957679	-0.464561	0.9951	0.9486
EIC_102	446037	-0.1678992	0.6876	0.957679	-0.041623	0.6810	0.9983
FAHFA_37	528301	0.1886763	0.7850	0.957679	1.188526	0.6464	0.6586
Eicosanoid_DHA [M-H]	529758	0.1558531	0.6624	0.957679	1.749663	0.8144	0.6501
Eicosanoid_Arachidonic Acid [M-H]	531480	-0.1667923	0.6951	0.957679	0.573798	0.6324	0.8993
VLCDCA_7	542382	0.2206233	0.9104	0.957679	0.650806	0.8132	0.8993
Putative_1-Stearoyl-2-hydroxy-sn-glycero-3-phosphoethanolamine	519992	0.2244277	0.9749	0.958315	-1.835323	1.4187	0.8232
FFA_Oleic Acid† [M-H]	534665	-0.2128873	0.9340	0.958315	0.926491	0.9697	0.8993
FFA_Arachidic Acid† [M-H+Acetate]	534912	0.1962931	0.8575	0.958315	0.089098	0.8150	0.9931
Novel EIC_44	186232	-0.1433543	0.6839	0.959411	-1.084387	0.7173	0.7604
Eicosanoid_15-epi-PGA1 [M-H+Acetate]	260175	-0.2242509	1.0004	0.959411	0.205079	0.7682	0.9793
Eicosanoid_19(R)-HETE [M-H]	362815	0.1894713	0.8762	0.959411	-0.019780	0.7294	0.9985
Putative_Levofloxacin	41558	-0.1219789	0.5783	0.959411	-0.130729	0.5283	0.9793
Eicosanoid_14,15-EET [M-H+Acetate]	444412	-0.2116929	0.9670	0.959411	-2.008639	1.2820	0.7499
Putative_Abietic acid	518727	0.1458237	0.6799	0.959411	0.549965	0.5934	0.8993
FFA_Palmitoleic Acid† [M-H+Acetate]	523988	0.2076558	0.9783	0.959411	-1.480556	0.8448	0.6924
FFA_Arachidic Acid† [M-H]	537803	0.1763251	0.8349	0.959411	0.178493	0.7938	0.9793
Polar Molecule_CORTEXOLONE [M-H]	153590	-0.1746465	0.8462	0.960751	-1.328333	0.7825	0.7024
EIC_79	252002	-0.1480790	0.7309	0.961737	0.662267	0.5806	0.8993
FFA_Arachidic Acid† [M-H+Acetate]	537842	0.1425127	0.7059	0.961737	0.437310	0.7519	0.9354
Polar Molecule_BIOTIN [M-H]	31198	0.1428687	0.7248	0.964471	-0.512908	0.7558	0.9354
Putative_2-Hydroxypalmitic acid	523924	0.2147952	1.1106	0.964717	0.482652	0.9693	0.9486
FAHFA_13	525986	0.1553965	0.8011	0.964717	-0.137333	1.0434	0.9858
EIC_251	297013	0.2104356	1.1490	0.968455	0.439069	1.0419	0.9486
Polar Molecule_PALMITOLEATE [M-H+Acetate]	520124	-0.1462396	0.8157	0.968455	-1.590752	1.2418	0.8301
VLCDCA_2	533159	-0.1443238	0.8067	0.968455	0.456395	0.7570	0.9354
FAHFA_69	542169	-0.1412459	0.7762	0.968455	-0.497129	0.7064	0.9215
Putative_6-((E)-2-((1R,2S,3R,5S)-3,5-Dihydroxy-2-((Z)-oct-2-enyl)cyclopentyl)vinyl)tetrahydro-2H-pyran-2-one	174904	-0.1326593	0.7830	0.970774	0.532501	0.6283	0.8993
Novel EIC_6	221883	-0.1709319	0.9982	0.970774	-2.153442	1.2391	0.6940
FFA_Stearidonic Acid [M-H]	481336	0.1575187	0.9236	0.970774	0.898721	0.9323	0.8993
VLCDCA_23	534469	-0.1288609	0.7570	0.970774	-1.075657	0.6795	0.7499
EIC_183	455310	0.0966158	0.5847	0.972946	0.453892	0.5979	0.8993
Polar Molecule_OLEOYL-GLYCEROL [M-H]	531324	0.1488272	0.9277	0.975683	-0.614022	0.7354	0.8993
FAHFA_39	528335	-0.1167315	0.7374	0.976039	1.948292	0.7945	0.5922
Eicosanoid_11b PGE2 [M-H]	104963	-0.0945062	0.7093	0.976878	0.245067	0.5205	0.9486
Bile Acid_Ursodeoxycholic acid [M-H+Acetate]	244872	-0.1476700	1.0237	0.976878	-1.218899	0.8845	0.8019
EIC_146	251251	-0.1411641	0.9452	0.976878	0.294696	1.0246	0.9793
EIC_192	402518	0.0937524	0.6815	0.976878	0.356705	0.6040	0.9354
FFA_Linoleic Acid† [M-H]	528366	-0.0848675	0.6362	0.976878	0.720869	0.5672	0.8323
FFA_Dihomo-g-linolenic† [M-H]	529407	0.1032278	0.7129	0.976878	0.949601	0.7574	0.8433
FAHFA_43	529622	-0.1258740	0.8855	0.976878	0.110936	0.9502	0.9896
Polar Molecule_STEARATE [M-H]	530351	-0.1158520	0.8506	0.976878	-0.146856	0.6510	0.9793
FAHFA_27	531614	0.1345532	1.0010	0.976878	0.472507	1.0817	0.9486
FFA_Heptadecanoic Acid† [M-H]	532380	-0.0989527	0.7011	0.976878	0.198920	0.7894	0.9793
VLCDCA_8	534206	-0.1020841	0.7429	0.976878	-1.231940	0.6841	0.6787
VLCDCA_41	540711	0.1486246	1.0329	0.976878	-0.217330	0.8993	0.9793
EIC_111	443405	0.1210598	0.9368	0.978859	0.644388	0.6974	0.8993
EIC_158	232601	0.1133607	0.9472	0.979077	-0.353082	0.9199	0.9584
EIC_158	235415	0.5142920	4.2242	0.979077	-0.038360	4.0642	0.9985
VLCDCA_6	535897	-0.0881653	0.7183	0.979077	-0.967214	0.6525	0.7604
VLCDCA_11	537154	-0.0752637	0.5976	0.979077	0.045839	0.4809	0.9983
FFA_Docosadienoic Acid† [M-H]	539086	-0.2106602	1.7753	0.979077	-1.612719	1.5882	0.8993
EIC_91	329577	-0.0716124	0.6276	0.980916	-0.364252	0.5741	0.9354
Polar Molecule_LUMICHROME [M-H]	57910	0.3211303	2.8401	0.980916	-1.034460	1.2369	0.8993
EIC_6	357386	-0.0730850	0.7306	0.981761	-0.435086	0.6860	0.9354
FFA_Stearidonic Acid [M-H]	488156	-0.1687466	1.6637	0.981761	-1.468036	1.5564	0.8993
Polar Molecule_OLEOYL-GLYCEROL [M-H+Acetate]	528185	-0.0974682	0.9213	0.981761	0.603033	1.0504	0.9354
FFA_Oleic Acid† [M-H]	530347	0.0781176	0.7687	0.981761	1.302593	0.6934	0.6586
VLCDCA_40	537628	0.0972216	0.9401	0.981761	-0.626871	0.7399	0.8993
VLCDCA_26	539195	-0.0689796	0.6609	0.981761	-1.367874	0.6867	0.6501
Putative_Tauroursodeoxycholic acid	181279	-0.1088142	1.1193	0.982695	-0.685813	1.3355	0.9486
EIC_263	208281	0.0449053	0.5524	0.984325	-0.353543	0.5609	0.9354
EIC_158	238213	0.6638255	7.2953	0.984325	1.684369	5.5140	0.9793
EIC_166	353621	0.0858450	1.0803	0.984325	0.199115	0.7531	0.9793
Eicosanoid_13-oxoODE [M-H+Acetate]	402537	-0.0693230	0.7476	0.984325	-0.310287	0.6626	0.9486
Putative_1-Palmitoyl-2-hydroxy-sn-glycero-3-phosphoethanolamine	444474	-0.0571486	0.7176	0.984325	-0.632660	0.5904	0.8993
FAHFA_8	518912	-0.0700305	0.8093	0.984325	0.537469	0.6760	0.8993
Polar Molecule_ELAIDATE [M-H]	527169	-0.3240463	3.9513	0.984325	2.698579	4.5518	0.9354
FAHFA_69	541292	0.0527025	0.6665	0.984325	-0.242628	0.6596	0.9587
VLCDCA_28	544581	0.0603525	0.7731	0.984325	-0.585876	0.5896	0.8993
EIC_138	199063	0.0500051	0.6620	0.984999	-0.004728	0.5429	0.9985
EIC_250	191117	-0.0357738	0.6115	0.987152	0.569085	0.5841	0.8993
Eicosanoid_13,14-dihydro-PGF1a [M-H]	195192	-0.0491777	0.7929	0.987152	0.753943	0.8581	0.8993
Putative_11a-Hydroxyprogesterone b-D-glucuronide	269360	0.0606389	1.0388	0.987152	-1.522697	1.0695	0.7812
Docosanoid_7(S),17(S)-hydroxy DPA [M-H+Acetate]	270778	0.0640142	0.9331	0.987152	-1.147226	0.8239	0.8019
Putative_3-Hydroxystanozolol glucuronide	281952	-0.0718178	1.0712	0.987152	0.446908	0.8713	0.9486
EIC_147	293675	-0.0943428	1.4723	0.987152	-0.167665	1.0194	0.9849
Bile Acid_Lithocholic Acid [M-H]	441724	0.0437825	0.7482	0.987152	0.093647	0.6580	0.9850
VLCDCA_44	544161	0.0558947	0.8431	0.987152	-0.482631	0.8052	0.9354
Polar Molecule_CORTISONE [M-H+Acetate]	118213	-0.0302800	0.7706	0.987316	-0.317617	0.7169	0.9486
Polar Molecule_CORTEXOLONE [M-H+Acetate]	155822	0.0517381	0.9620	0.987316	-1.488521	0.8641	0.6940
Eicosanoid_PGF1a [M-H]	174973	0.0333063	0.8025	0.987316	1.044968	0.6203	0.7024
Eicosanoid_17,18-DiHETE [M-H+Acetate]	263807	0.0304825	0.7112	0.987316	0.120221	0.6485	0.9828
Docosanoid_7(S),17(S)-hydroxy DPA [M-H+Acetate]	275325	0.0195116	0.6487	0.987316	0.736265	0.7261	0.8993
EIC_348	329017	-0.0194753	0.6564	0.987316	-1.074905	0.6281	0.7024
Eicosanoid_9-oxoOTrE [M-H+Acetate]	368320	-0.0490708	0.9981	0.987316	-1.325742	1.0216	0.8232
Eicosanoid_15(S) HEPE [M-H+Acetate]	371287	-0.0607164	1.1724	0.987316	0.120141	1.3522	0.9983
EIC_7	401671	0.0491797	1.1606	0.987316	2.192454	0.8693	0.5922
FAHFA_4	509868	-0.0529488	1.4548	0.987316	-0.566819	1.5431	0.9587
Eicosanoid_EPA [M-H]	518723	0.0326810	0.6876	0.987316	0.438425	0.5722	0.8993
FFA_Pentadecanoic Acid† [M-H]	527657	-0.0331123	0.9062	0.987316	-0.190179	0.7901	0.9793
FAHFA_56	530580	0.0289157	0.9701	0.987316	-0.602011	0.8994	0.9354
VLCDCA_42	544630	-0.0362502	0.7285	0.987316	-0.577862	0.6981	0.8993
Polar Molecule_LUMICHROME [M-H]	63608	0.0814367	2.4755	0.987316	-0.561171	1.3583	0.9486
FFA_Myristic Acid [M-H]	527646	-0.0144787	0.8125	0.994078	-0.392145	0.6387	0.9354
Putative_Androstan-3-ol-17-one 3-glucuronide	167264	-0.0084067	0.8337	0.998749	-0.821716	0.7414	0.8993
EIC_122	361269	0.0074514	0.8734	0.998749	-0.163861	0.7400	0.9793
Polar Molecule_LIOTHYRONINE [M-H]	116699	0.0036698	0.8225	0.999781	-0.116133	0.6381	0.9830
FFA_Heptadecanoic Acid† [M-H]	534537	0.0026225	0.6975	0.999781	0.010372	0.7905	0.9985
Eicosanoid_12epi LTB4 [M-H+Acetate]	285289	0.0013240	0.7882	0.999875	-0.277635	0.6995	0.9542
EIC_72	439727	-0.0001326	0.8459	0.999875	-0.803418	0.8385	0.8993

## Sheet: Supplementary Table 6.
Supplementary Table 6. The effect of intensive fat mass loss and fat mass regain on LC-MS-Metabolome in the diet group compared to control group of physique study participants, when adjusted with total fat mass (DEXA)
Annotation and adduct information		PRE-MID			PRE-POST
Metabolite ID	Matching ID	Estimate	Standard error	FDR	Estimate	Standard error	FDR
EIC_260	267578	2.244240	0.5542	0.01072	0.050238	0.5611	0.9877
Novel EIC_5	373373	2.613258	0.6319	0.01072	0.439975	0.5958	0.9121
Polar Molecule_OLEOYL-GLYCEROL [M-H]	523301	5.860414	1.4959	0.01072	-0.862418	1.0819	0.9121
FFA_Tricosenoic Acid [M-H]	539371	4.816792	1.2045	0.01072	-0.713600	0.5671	0.8220
Polar Molecule_TRICOSANOATE [M-H]	539374	5.000684	1.2643	0.01072	-0.778420	0.6202	0.8220
FFA_Nervonic Acid† [M-H]	541517	2.802650	0.6969	0.01072	1.691700	0.6006	0.5786
EIC_69	419015	6.997844	1.8608	0.01741	1.404285	1.3306	0.9102
Eicosanoid_13S-HpOTrE(gamma) [M-H]	387101	4.101108	1.1008	0.01751	-1.618365	1.0871	0.7761
Putative_N-Oleoyl-L-serine	524040	3.298577	0.9061	0.02147	-0.949277	0.5713	0.6949
FFA_Tricosenoic Acid [M-H]	542617	3.807981	1.0530	0.02147	0.312338	0.5853	0.9302
FFA_Behenic Acid† [M-H]	540593	2.220933	0.6185	0.02154	-0.400725	0.4943	0.9121
FFA_Lignoceric Acid† [M-H+Acetate]	546323	4.285553	1.2116	0.02424	0.452262	0.6046	0.9121
EIC_64	296371	5.227262	1.5041	0.02822	0.455324	0.7381	0.9302
Polar Molecule_GAMMA-LINOLENATE [M-H]	516521	-2.140573	0.6292	0.03434	0.059098	0.7305	0.9918
EIC_17	404135	2.958972	0.8930	0.03895	0.356739	0.7120	0.9302
Novel EIC_28	457606	11.511316	3.4698	0.03895	-0.435517	0.7328	0.9302
FFA_Behenic Acid† [M-H]	542037	3.250688	0.9769	0.03895	0.031725	0.5465	0.9952
EIC_69	413523	3.661022	1.1109	0.03923	0.138148	0.7419	0.9841
Novel EIC_9	424299	4.369024	1.3414	0.04260	-1.498721	0.7039	0.6316
EIC_125	198399	4.479771	1.3859	0.04415	1.068296	1.7170	0.9302
Polar Molecule_CORTISONE [M-H+Acetate]	106542	2.378925	0.7518	0.04513	0.831136	0.6133	0.8132
EIC_71	312209	3.559462	1.1283	0.04513	0.696233	0.7085	0.9102
Eicosanoid_11,12-diHETrE [M-H+Acetate]	350152	4.838493	1.5192	0.04513	0.586303	0.9940	0.9302
EIC_69	416464	4.917212	1.5610	0.04513	0.826822	1.0537	0.9121
FFA_Tricosanoic Acid† [M-H]	544047	2.239019	0.7099	0.04513	-0.362902	0.5851	0.9302
FFA_Lignoceric Acid† [M-H]	546284	4.634713	1.4443	0.04513	0.500907	0.6701	0.9121
EIC_125	185482	6.116830	1.9693	0.04700	-1.265119	0.8503	0.7761
FFA_Nervonic Acid† [M-H]	545847	2.731524	0.8746	0.04700	0.301796	0.6384	0.9302
EIC_271	281689	3.863970	1.2895	0.06547	1.134992	0.7842	0.7806
EIC_121	285160	3.017454	1.0265	0.07622	0.090633	0.6395	0.9856
FFA_Lignoceric Acid† [M-H]	544841	2.878948	0.9904	0.08200	-0.505586	0.7327	0.9121
Eicosanoid_5S-HpEPE [M-H]	400564	2.702219	0.9477	0.09206	-0.009352	0.6356	0.9965
Putative_1-Oleoyl-sn-glycero-3-phosphoethanolamine	463104	2.945226	1.0300	0.09206	-0.924254	0.5653	0.6949
Polar Molecule_CORTISONE [M-H+Acetate]	100714	2.541816	0.9014	0.09870	1.132551	0.6228	0.6776
Novel EIC_8	433376	3.555125	1.2648	0.09870	-0.088994	0.6988	0.9856
EIC_73	294423	3.566067	1.2769	0.10152	-0.732387	0.8238	0.9102
EIC_233	167632	2.916305	1.0515	0.10390	0.530281	0.8654	0.9302
Eicosanoid_11,12-diHETrE [M-H]	355943	2.314405	0.8361	0.10390	0.654009	0.6172	0.9102
EIC_62	253339	6.614640	2.3967	0.10392	-0.451769	0.8864	0.9302
Eicosanoid_13,14-dihydro-15-keto-PGA2 [M-H+Acetate]	253519	5.143832	1.8794	0.10480	-0.407885	0.7740	0.9302
EIC_63	399217	3.448242	1.2615	0.10480	-0.063083	0.6799	0.9871
Bile Acid_Taurocholic Acid [M-H]	121166	6.802298	2.5213	0.11402	0.550613	1.6407	0.9700
Eicosanoid_2,3-dinor-PGE1 [M-H+Acetate]	139967	-1.423997	0.5361	0.12352	-1.162380	0.6211	0.6481
Putative_Chenodeoxycholic acid 24-acyl-b-D-glucuronide	236149	3.829840	1.4482	0.12352	0.509569	0.8407	0.9302
Eicosanoid_8,9-diHETrE [M-H]	357813	1.834986	0.6946	0.12352	1.292693	0.6529	0.6316
Novel EIC_9	422540	2.957445	1.1195	0.12352	-1.764316	0.7175	0.5786
Bile Acid_Glycochenodeoxycholic Acid [M-H]	255997	4.508329	1.7163	0.12393	-1.861909	0.9669	0.6481
FFA_Nervonic Acid† [M-H]	544451	2.525343	0.9589	0.12393	-0.704804	0.6965	0.9102
FFA_Docosaenoic Acid† [M-H]	537429	2.459023	0.9395	0.12488	0.559874	0.6894	0.9121
EIC_62	263579	3.326445	1.2792	0.12875	-0.341626	0.7018	0.9302
Bile Acid_b-Muricholic Acid [M-H]	235527	12.375488	4.8133	0.13315	-6.923159	3.8826	0.6776
EIC_51	336280	2.501390	0.9728	0.13315	-0.397011	0.7382	0.9302
EIC_345	397350	2.757266	1.0731	0.13315	-1.162500	0.9695	0.8456
Eicosanoid_11-dehydro-2,3-dinor-TXB2 [M-H+Acetate]	132844	3.234517	1.2795	0.13764	-0.627680	0.6146	0.9102
Bile Acid_b-Muricholic Acid [M-H+Acetate]	235588	12.105340	4.7485	0.13764	-6.421134	3.8341	0.6949
EIC_121	298758	2.799005	1.1002	0.13764	-2.436399	1.2264	0.6316
Bile Acid_Deoxycholic Acid [M-H]	353270	5.407500	2.1444	0.13764	-2.901921	1.4559	0.6316
Bile Acid_Deoxycholic Acid [M-H+Acetate]	353332	5.796501	2.2924	0.13764	-3.039684	1.5403	0.6316
FFA_Behenic Acid† [M-H+Acetate]	542079	3.054971	1.2106	0.13764	-0.336245	0.6546	0.9302
Eicosanoid_13-HODE [M-H+Acetate]	397750	2.954285	1.1818	0.14179	-0.009575	0.7686	0.9965
EIC_52	240462	2.756086	1.1080	0.14459	-0.387752	0.5415	0.9121
Eicosanoid_13S-HpOTrE [M-H]	370062	2.998890	1.2114	0.14495	-1.119113	0.6309	0.6776
Bile Acid_Chenodeoxycholic acid [M-H]	335887	12.283474	4.9952	0.14949	-6.828625	3.7501	0.6776
FAHFA_71	537708	2.658406	1.0839	0.14991	0.696797	0.7277	0.9102
Bile Acid_Chenodeoxycholic acid [M-H+Acetate]	335959	11.734331	4.8271	0.15248	-6.554241	3.6185	0.6776
Eicosanoid_9(S) HOTrE [M-H]	353929	2.258750	0.9262	0.15248	-0.326596	0.6501	0.9302
EIC_14	394634	4.789757	1.9680	0.15248	0.065638	0.9709	0.9948
Polar Molecule_OLEOYL-GLYCEROL [M-H]	522767	3.413644	1.4071	0.15248	0.232907	0.9653	0.9706
FFA_Nervonic Acid† [M-H]	539105	2.118163	0.8783	0.15450	-0.764311	0.5742	0.8132
FFA_Tricosanoic Acid† [M-H+Acetate]	542670	1.766419	0.7326	0.15450	-0.450775	0.5095	0.9102
EIC_124	240491	2.315792	0.9763	0.16311	0.811269	1.1644	0.9121
Eicosanoid_14,15-DiHETE [M-H+Acetate]	298878	2.738654	1.1538	0.16311	-0.200982	0.7604	0.9706
Putative_Levofloxacin	34432	-1.324307	0.5574	0.16311	-0.737849	0.5544	0.8132
FAHFA_15	527360	-1.856772	0.7800	0.16311	-0.335912	0.7911	0.9465
EIC_62	256944	3.581786	1.5328	0.17702	-0.386043	0.9145	0.9465
Bile Acid_Deoxycholic Acid [M-H+Acetate]	346895	10.131554	4.3527	0.17820	-5.170587	1.8774	0.5786
EIC_63	392256	4.028317	1.7375	0.17820	0.153014	1.3628	0.9856
EIC_16	399201	2.075226	0.8960	0.17820	0.093184	0.6468	0.9856
VLCDCA_15	533187	-1.590518	0.6868	0.17820	-1.018584	0.7384	0.8125
EIC_47	197702	2.924240	1.2801	0.18572	0.218141	0.8940	0.9706
Eicosanoid_13,14-dihydro-PGE1 [M-H]	198449	1.934821	0.8462	0.18572	1.901693	0.6273	0.5786
EIC_176	379289	2.401071	1.0467	0.18572	0.964808	0.5628	0.6949
Eicosanoid_12S-HpEPE [M-H]	392272	2.659985	1.1655	0.18572	0.254423	1.0119	0.9706
EIC_229	193228	1.414759	0.6235	0.18787	0.265602	0.6074	0.9452
FFA_Tricosenoic Acid [M-H]	541791	2.237809	0.9860	0.18787	-1.420926	0.6416	0.6316
EIC_184	334912	1.624915	0.7187	0.18986	0.862743	0.5896	0.7761
Eicosanoid_15 oxoEDE [M-H+Acetate]	467225	2.717058	1.2098	0.19521	0.725477	0.8042	0.9102
FFA_Eicosenoic Acid [M-H+Acetate]	534432	1.707740	0.7666	0.20245	-0.131222	0.7203	0.9841
EIC_166	350670	2.923619	1.3195	0.20656	-0.121577	0.8071	0.9856
FFA_Tricosanoic Acid† [M-H]	542623	1.646162	0.7503	0.21602	-0.615896	0.5285	0.8703
Eicosanoid_tetranor-PGFM [M-H]	31459	-2.320498	1.0711	0.22916	-1.345467	1.0219	0.8220
Eicosanoid_15t-Protectin D1 [M-H+Acetate]	275324	-1.553557	0.7188	0.22971	-0.616880	0.6101	0.9102
FFA_Eicosenoic Acid [M-H]	533336	-1.843340	0.8550	0.23043	0.552464	0.6867	0.9121
Eicosanoid_8(S) HETrE [M-H+Acetate]	445744	2.377128	1.1050	0.23080	-1.041276	1.1834	0.9102
Bile Acid_Tauroursodeoxycholic acid [M-H]	164435	3.506605	1.6526	0.24587	1.359071	1.3839	0.9102
Eicosanoid_PGE3 [M-H+Acetate]	148936	1.408504	0.6667	0.24905	0.183662	0.5477	0.9700
Putative_Androsterone glucuronide	170446	2.549661	1.2172	0.25769	-1.581620	0.6248	0.5786
EIC_1	325888	1.800312	0.8652	0.26140	-0.700175	0.9560	0.9121
FAHFA_76	545467	-1.636818	0.7856	0.26140	-1.442244	0.7576	0.6481
EIC_33	446442	1.924127	0.9279	0.26351	-2.025034	1.3906	0.7782
Putative_Levofloxacin	36118	1.500691	0.7270	0.26452	0.570263	0.7099	0.9121
EIC_110	433852	1.423473	0.6887	0.26452	0.596440	0.6711	0.9102
EIC_71	298732	2.370121	1.1629	0.27396	-0.219966	0.8006	0.9706
FFA_Palmitoleic Acid† [M-H]	526135	-1.234202	0.6036	0.27396	0.005497	0.5262	0.9965
FFA_Heptadecaenoic Acid† [M-H+Acetate]	531646	6.721432	3.2961	0.27396	0.396426	0.9915	0.9586
Docosanoid_7-epi-Maresin 1 [M-H+Acetate]	254854	-8.722298	4.2933	0.27579	-3.181758	2.3693	0.8132
EIC_322	247451	1.139515	0.5671	0.28308	0.390245	0.5644	0.9121
EIC_65	333119	3.535201	1.7589	0.28308	-0.617688	0.9066	0.9121
FFA_Pentadecanoic Acid† [M-H]	528566	-1.575952	0.7834	0.28308	-0.802830	0.7884	0.9102
Polar Molecule_ERUCATE [M-H+Acetate]	533386	2.312454	1.1571	0.28802	-0.230547	0.6756	0.9700
EIC_267	224977	-1.998419	1.0050	0.28892	0.490912	0.9603	0.9302
Eicosanoid_tetranor 12(R) HETE [M-H+Acetate]	320002	1.751030	0.8816	0.28892	1.253101	0.7465	0.6949
Eicosanoid_5,6-diHETrE [M-H]	390693	-1.998396	1.0040	0.28892	-1.631749	0.9482	0.6949
Bile Acid_Ursodeoxycholic acid [M-H+Acetate]	237318	2.985888	1.5185	0.30016	-1.445249	0.9881	0.7761
Bile Acid_b-Muricholic Acid [M-H]	237948	24.490120	12.5478	0.30751	-6.958687	7.2181	0.9102
EIC_178	254050	-8.729136	4.4793	0.30751	-3.994944	2.7234	0.7761
EIC_20	393655	2.518339	1.2971	0.31020	-1.123097	1.0753	0.9102
Putative_PGPC	448001	4.995529	2.5800	0.31141	-0.020035	1.2398	0.9965
Putative_Bilirubin	525957	-2.357538	1.2203	0.31197	-1.675742	1.1368	0.7761
EIC_22	406441	1.511861	0.7871	0.31744	-0.193667	0.7362	0.9706
EIC_306	316868	1.833512	0.9610	0.32447	0.070661	0.7423	0.9871
VLCDCA_1	531095	-1.555460	0.8221	0.33380	-0.968893	1.0007	0.9102
Eicosanoid_13,14-dihydro-PGE1 [M-H]	185541	1.507619	0.8010	0.33863	0.138819	0.5752	0.9706
FFA_Palmitoleic Acid† [M-H]	529701	-1.238648	0.6597	0.33941	0.788560	0.6163	0.8220
Polar Molecule_N-ACETYLTRYPTOPHAN [M-H+Acetate]	49032	-2.205379	1.1831	0.34727	-0.424863	0.9429	0.9380
Bile Acid_Ursodeoxycholic acid [M-H]	237244	3.020696	1.6342	0.35700	-1.268121	1.0349	0.8297
Eicosanoid_11-dehydro-2,3-dinor-TXB2 [M-H+Acetate]	136286	1.315451	0.7170	0.36257	-0.635348	0.6189	0.9102
EIC_100	410589	-1.458400	0.7940	0.36257	-1.553955	1.1017	0.8013
EIC_303	333176	1.806274	0.9935	0.37322	0.207896	0.7166	0.9706
Putative_Androsterone glucuronide	179343	3.314578	1.8418	0.38584	-0.793805	0.7251	0.9102
Polar Molecule_ELAIDATE [M-H+Acetate]	527688	1.645059	0.9191	0.39128	1.379740	0.9184	0.7761
FFA_Linoleic Acid† [M-H]	526174	-1.221300	0.6842	0.39263	0.134703	0.7720	0.9856
EIC_158	226291	1.553782	0.8729	0.39403	-0.351920	0.9998	0.9700
Putative_Abietic acid	514832	-3.528868	2.0027	0.40396	-0.965129	0.9652	0.9102
Putative_2-Hydroxypalmitic acid	525710	-1.081599	0.6139	0.40396	0.012907	0.6663	0.9965
EIC_95	408174	-1.204902	0.6858	0.40526	-0.363493	0.7196	0.9302
EIC_29	356636	1.352525	0.7737	0.40885	0.397471	0.5539	0.9121
FAHFA_14	522914	-1.377864	0.7890	0.40885	-0.244176	0.6442	0.9623
Putative_1-Pentadecanoyl-sn-glycero-3-phosphocholine	394443	1.140681	0.6574	0.41333	-0.471799	0.5679	0.9121
FFA_a-linolenic Acid† [M-H]	517566	-2.194235	1.2649	0.41333	-0.621226	0.8129	0.9121
Eicosanoid_13,14-dihydro-15-keto-PGE1 [M-H]	215016	-4.037143	2.3336	0.41403	-0.807710	1.4667	0.9302
FFA_Myristic Acid [M-H+Acetate]	522387	-1.513105	0.8766	0.41403	0.081149	0.8073	0.9857
VLCDCA_23	535937	-1.320940	0.7661	0.41403	-1.221422	0.6886	0.6776
Polar Molecule_CORTISOL [M-H]	107951	1.761880	1.0295	0.41453	0.220152	0.7133	0.9706
EIC_137	217947	1.385725	0.8065	0.41453	-0.924676	0.8051	0.8838
Eicosanoid_11(12)-EpETE [M-H]	421508	-1.474529	0.8613	0.41453	-0.878053	0.9764	0.9102
VLCDCA_1	531896	-1.593269	0.9311	0.41453	-0.042684	1.0093	0.9965
FFA_Palmitoleic Acid† [M-H+Acetate]	526018	-1.053821	0.6199	0.42161	0.060751	0.5654	0.9856
Novel EIC_6	225577	-1.124746	0.6718	0.43646	-1.107795	0.8227	0.8132
Eicosanoid_LTB4 ethanol amide [M-H+Acetate]	227844	1.594771	0.9515	0.43646	1.564271	1.0643	0.7761
EIC_312	348127	1.458742	0.8690	0.43646	0.395387	0.6714	0.9302
EIC_45	226969	1.135068	0.6807	0.43967	0.566178	0.6032	0.9102
EIC_101	433368	1.155018	0.6972	0.44695	0.331242	0.6129	0.9302
Eicosanoid_PGG2 [M-H+Acetate]	192014	-1.912661	1.1611	0.44991	-0.980332	0.8943	0.9102
FFA_a-linolenic Acid† [M-H]	527674	1.319689	0.8001	0.44991	0.405237	0.7548	0.9302
EIC_225	261389	-0.980540	0.5992	0.45171	-0.132749	0.5721	0.9721
EIC_68	383553	1.599078	0.9761	0.45171	-0.749905	0.5878	0.8220
VLCDCA_8	532895	-0.936366	0.5712	0.45171	-1.266592	0.5191	0.5786
EIC_10	432853	-0.887940	0.5438	0.45217	0.429713	0.5369	0.9121
EIC_181	341438	1.081691	0.6643	0.45362	0.631230	0.7968	0.9121
Eicosanoid_5,6-EET [M-H]	467558	-1.181616	0.7308	0.45865	0.035386	0.6091	0.9952
Polar Molecule_HEPTADECANOATE [M-H]	529375	-1.276102	0.7883	0.45865	0.176052	0.7200	0.9706
Eicosanoid_12S-HpETE [M-H]	430722	-1.471008	0.9155	0.46536	-2.210271	0.8920	0.5786
FFA_Myristic Acid [M-H]	522346	-1.360639	0.8517	0.47145	-0.008574	0.7740	0.9965
EIC_51	330923	1.490366	0.9364	0.47412	0.138361	0.8802	0.9856
Putative_N-Oleoyl-L-serine	522459	1.706196	1.0739	0.47412	-1.986234	0.8249	0.5786
Putative_Chenodeoxycholic acid 24-acyl-b-D-glucuronide	232936	2.369950	1.5068	0.48153	-0.912861	0.7286	0.8220
EIC_310	316877	1.458449	0.9258	0.48153	0.388304	0.7722	0.9302
EIC_65	321476	1.527633	0.9736	0.48153	-1.623348	0.7310	0.6316
Eicosanoid_13(S) HOTrE(y) [M-H]	373917	1.776988	1.1311	0.48153	-1.269779	0.8259	0.7761
EIC_31	407392	1.284724	0.8201	0.48153	1.505796	0.7762	0.6481
EIC_135	324550	1.955308	1.2515	0.48291	0.176121	0.8531	0.9795
Putative_Glycocholic acid	179340	2.917156	1.9230	0.49019	-1.469179	0.7799	0.6481
EIC_125	190567	1.417218	0.9345	0.49019	0.472450	1.2570	0.9623
EIC_80	358635	-3.313349	2.1643	0.49019	-1.066437	0.7267	0.7761
Eicosanoid_5,6-diHETrE [M-H]	383602	0.967707	0.6318	0.49019	0.593120	0.6941	0.9121
EIC_15	406050	1.498621	0.9796	0.49019	0.162249	0.7489	0.9736
Eicosanoid_15S-HpETE [M-H]	413128	1.141800	0.7371	0.49019	-0.924723	0.6492	0.7985
EIC_100	414042	1.331858	0.8640	0.49019	-0.047660	1.2084	0.9965
EIC_23	437680	1.571446	1.0374	0.49019	-0.646856	0.7630	0.9121
FAHFA_22	526407	-0.991043	0.6420	0.49019	0.058760	0.6990	0.9909
FAHFA_47	529594	-1.614821	1.0606	0.49019	0.800192	1.1417	0.9121
FFA_Palmitoleic Acid† [M-H]	531843	-1.162891	0.7605	0.49019	0.474299	0.6997	0.9121
FFA_Stearic Acid† [M-H]	533317	1.346284	0.8676	0.49019	0.972069	0.7545	0.8220
Putative_2a-Methyl-5a-androstan-3a-ol-17-one glucuronide	98088	1.152917	0.7562	0.49019	0.194596	0.8171	0.9711
Eicosanoid_PGG2 [M-H+Acetate]	184987	-1.953690	1.2970	0.49210	-0.290017	0.9925	0.9706
EIC_329	263763	0.886674	0.5899	0.49210	0.442032	0.6476	0.9121
Putative_PGPC	447166	4.691461	3.1201	0.49210	-0.076710	0.9869	0.9918
FAHFA_62	533738	-1.191255	0.7939	0.49210	-1.474661	0.8652	0.6949
Eicosanoid_LTF4 [M-H]	266556	-1.535667	1.0276	0.49544	0.824927	0.5973	0.8125
Polar Molecule_CORTICOSTERONE [M-H+Acetate]	140738	-1.099470	0.7386	0.49863	-1.081475	0.5688	0.6481
EIC_263	204232	0.761132	0.5145	0.50502	-0.668506	0.5482	0.8297
Bile Acid_Glycochenodeoxycholic Acid [M-H]	237311	1.416288	0.9642	0.51262	-1.103528	0.5340	0.6316
Putative_5a-Androstan-3a,17b-diol-17b-glucuronide	157904	-1.084811	0.7413	0.51290	-1.018022	0.5759	0.6776
VLCDCA_34	544601	-0.746613	0.5101	0.51290	-1.220569	0.4735	0.5786
Polar Molecule_GLYCOCHOLATE [M-H]	172623	3.108045	2.1338	0.51413	-1.788694	0.8421	0.6316
Putative_7-Keto-3a,12-a-dihydroxycholanic acid	173610	1.425540	0.9872	0.51413	1.319178	0.8066	0.6949
EIC_58	342155	2.376127	1.6450	0.51413	-1.121920	1.5460	0.9121
Putative_Dodecylbenzenesulfonic acid	399899	1.366972	0.9446	0.51413	-0.669748	0.9683	0.9121
EIC_109	403246	-7.423378	5.1049	0.51413	-0.792955	4.6268	0.9856
FFA_Heptadecaenoic Acid† [M-H]	529369	-1.247780	0.8619	0.51413	0.092840	0.7355	0.9856
FFA_Heptadecaenoic Acid† [M-H+Acetate]	532124	1.339202	0.9188	0.51413	1.658537	0.9141	0.6776
Polar Molecule_ROSMARINATE [M-H]	46338	1.103029	0.7662	0.51509	0.617114	0.9727	0.9302
VLCDCA_1	533929	0.998005	0.6940	0.51509	-0.535566	0.6986	0.9121
Putative_2-Hydroxypalmitic acid	521349	-0.876817	0.6112	0.51586	1.507624	0.6355	0.6050
Bile Acid_Ursodeoxycholic acid [M-H+Acetate]	241332	1.553230	1.0949	0.51930	0.776889	0.6362	0.8297
Putative_Chenodeoxycholic acid 24-acyl-b-D-glucuronide	242299	2.507525	1.7652	0.51930	-0.620392	0.8583	0.9121
EIC_135	321522	1.998281	1.4047	0.51930	0.098394	0.7588	0.9856
Eicosanoid_8,9-diHETrE [M-H+Acetate]	365688	1.526341	1.0752	0.51930	0.728773	0.9470	0.9121
Putative_1-Stearoyl-2-hydroxy-sn-glycero-3-phosphoethanolamine	521802	0.925216	0.6518	0.51930	0.342512	0.6022	0.9302
EIC_176	370103	1.107592	0.7871	0.52572	0.763303	0.6848	0.9102
FFA_Oleic Acid† [M-H+Acetate]	532675	1.292717	0.9178	0.52572	0.126151	0.9746	0.9856
Eicosanoid_14,15 LTD4 [M-H+Acetate]	258994	0.976160	0.7057	0.54692	0.926134	0.8959	0.9102
Eicosanoid_7,17 dhDPA [M-H+Acetate]	289392	0.774320	0.5613	0.54812	0.267344	0.5090	0.9302
Putative_Androsterone glucuronide	172624	3.281615	2.3859	0.54985	-1.848179	0.9385	0.6316
EIC_15	410919	-1.145260	0.8353	0.55049	-1.181027	0.9431	0.8220
EIC_108	414045	1.050365	0.7668	0.55049	0.110281	1.0045	0.9856
EIC_80	365075	1.393864	1.0230	0.55541	0.620024	0.9108	0.9121
Eicosanoid_13(S) HOTrE [M-H+Acetate]	365619	1.230634	0.9073	0.55909	-0.037339	0.9392	0.9965
EIC_250	199108	-0.814606	0.6063	0.56319	0.222017	0.5725	0.9623
EIC_62	269687	1.167385	0.8694	0.56319	-0.064356	0.5580	0.9856
Eicosanoid_5,6-diHETrE [M-H]	386644	-1.100493	0.8172	0.56319	-1.311180	1.0145	0.8220
FFA_Linoleic Acid† [M-H+Acetate]	528408	1.312066	0.9722	0.56319	2.431526	1.0861	0.6316
Putative_6-((E)-2-((1R,2S,3R,5S)-3,5-Dihydroxy-2-((Z)-oct-2-enyl)cyclopentyl)vinyl)tetrahydro-2H-pyran-2-one	167035	-0.975386	0.7284	0.56370	0.017507	0.5129	0.9965
EIC_178	244703	0.698023	0.5219	0.56370	0.030105	0.5901	0.9965
EIC_156	264493	0.969528	0.7265	0.56416	0.374134	0.6587	0.9302
EIC_71	305288	1.549907	1.1672	0.56849	-1.876473	1.1499	0.6949
Endocannabinoid_Arachidonoyl Ethanolamide [M-H+Acetate]	479677	-0.773192	0.5865	0.57217	0.381346	0.6922	0.9302
Eicosanoid_Adrenic Acid [M-H]	530967	-0.910671	0.6908	0.57217	0.610656	0.6898	0.9102
Polar Molecule_allo-Tetrahydrocortisol [M-H+Acetate]	84478	0.911997	0.6924	0.57217	-0.032342	0.8054	0.9965
Polar Molecule_GLYCOCHOLATE [M-H]	170444	1.674245	1.2791	0.57318	-1.406875	0.5707	0.5786
EIC_205	208847	0.949888	0.7244	0.57318	-0.030443	0.5679	0.9965
Eicosanoid_tetranor 12(R) HETE [M-H]	322224	0.940216	0.7221	0.57318	-0.320721	0.7382	0.9452
EIC_110	437709	1.157363	0.8879	0.57318	0.302533	1.0973	0.9706
Polar Molecule_GAMMA-LINOLENATE [M-H+Acetate]	518129	5.834343	4.4469	0.57318	3.636572	3.4911	0.9102
Polar Molecule_TRICOSANOATE [M-H]	540604	0.922382	0.7080	0.57318	-0.969761	0.4904	0.6316
Eicosanoid_13(S) HOTrE(y) [M-H]	378072	1.519669	1.1694	0.57326	0.095332	0.6788	0.9856
FFA_Behenic Acid† [M-H]	539090	1.324219	1.0260	0.57993	0.446310	0.9658	0.9334
Eicosanoid_13,14-dihydro-PGF1a [M-H]	190593	-1.662615	1.3030	0.58392	0.007857	0.7459	0.9965
EIC_322	266179	0.767739	0.6020	0.58392	-0.900877	0.5096	0.6776
Novel EIC_24	466757	1.190778	0.9309	0.58392	-0.128023	1.1325	0.9856
FFA_Pentadecanoic Acid† [M-H]	530326	-0.907260	0.7092	0.58392	-0.359901	0.8241	0.9452
VLCDCA_7	539773	1.624092	1.2681	0.58392	-0.780294	0.8120	0.9102
EIC_41	183510	1.177880	0.9277	0.58493	-0.025640	0.7320	0.9965
Novel EIC_14	448206	1.339865	1.0547	0.58493	0.463800	0.9816	0.9302
Eicosanoid_11-dehydro-2,3-dinor-TXB2 [M-H+Acetate]	143490	-0.953041	0.7575	0.59195	-0.005977	0.7658	0.9965
Novel EIC_13	426801	1.229615	0.9812	0.59195	0.345944	1.1234	0.9706
FFA_Heptadecanoic Acid† [M-H+Acetate]	534128	0.739245	0.5881	0.59195	0.788599	0.8014	0.9102
FFA_Palmitic Acid† [M-H+Acetate]	534889	0.992753	0.7908	0.59195	0.740813	0.8673	0.9121
EIC_124	238208	0.934835	0.7506	0.59402	-0.074866	0.7190	0.9856
Eicosanoid_tetranor-PGFM [M-H]	29345	-0.982988	0.7900	0.59402	-0.348821	0.7665	0.9352
FAHFA_48	528338	0.935707	0.7543	0.59402	1.707054	0.7993	0.6316
VLCDCA_6	532891	-1.308311	1.0536	0.59402	-1.092158	1.0451	0.9102
FAHFA_69	545400	1.586405	1.2918	0.60213	-0.392904	1.1072	0.9700
Polar Molecule_allo-Tetrahydrocortisol [M-H+Acetate]	97322	-1.192550	0.9704	0.60213	0.370800	0.7355	0.9302
EIC_251	291460	5.024297	4.1046	0.60397	2.903088	3.6995	0.9121
Putative_4-[5-[[4-[5-[acetyl(hydroxy)amino]pentylamino]-4-oxobutanoyl]-hydroxyamino]pentylamino]-4-oxobutanoic acid	390962	-0.866559	0.7141	0.61269	0.500067	0.7042	0.9121
EIC_86	450186	-0.573309	0.4738	0.61399	-0.895356	0.5485	0.6949
VLCDCA_11	533173	-0.996563	0.8281	0.61773	0.081212	0.7068	0.9856
VLCDCA_1	534965	1.427109	1.1874	0.61773	0.113504	1.0593	0.9856
Putative_1a-Methyl-5a-androstan-3a,17b-diol glucuronide	96184	1.110986	0.9261	0.61783	0.277868	1.0957	0.9706
Polar Molecule_THYMIDINE-MONOPHOSPHATE [M-H+Acetate]	35550	-0.801457	0.6737	0.62432	-1.758166	0.8011	0.6316
EIC_194	407696	1.105279	0.9296	0.62432	0.396605	0.8261	0.9302
Bile Acid_Glycoursodeoxycholic Acid [M-H]	169245	1.158629	0.9787	0.62515	-0.418460	0.7407	0.9302
VLCDCA_23	533191	-1.011686	0.8546	0.62515	0.130178	0.6868	0.9837
Eicosanoid_8-iso-PGA2 [M-H+Acetate]	222096	0.859124	0.7281	0.62679	-0.188015	0.6462	0.9706
Eicosanoid_PDX [M-H+Acetate]	282516	0.970650	0.8247	0.62679	0.737472	0.8176	0.9102
Eicosanoid_18(+/-)-HETE [M-H+Acetate]	377399	-0.766697	0.6521	0.62679	0.202274	0.5749	0.9700
Eicosanoid_15k PGF2a [M-H+Acetate]	109511	0.798287	0.6884	0.63653	0.561926	0.6434	0.9121
EIC_157	292929	1.053672	0.9070	0.63653	-0.584594	0.7569	0.9121
Putative_4-[5-[[4-[5-[acetyl(hydroxy)amino]pentylamino]-4-oxobutanoyl]-hydroxyamino]pentylamino]-4-oxobutanoic acid	381293	-0.961293	0.8304	0.63653	0.468982	0.8179	0.9302
VLCDCA_26	535393	-0.880426	0.7588	0.63653	-1.093879	0.7176	0.7761
EIC_137	228394	0.669342	0.5886	0.65131	-0.061581	0.5887	0.9856
FAHFA_59	532202	-1.083942	0.9526	0.65131	-0.503011	0.8433	0.9302
FFA_Arachidic Acid† [M-H]	536380	1.238642	1.0855	0.65131	-0.850218	1.1037	0.9121
EIC_232	222789	0.891609	0.7856	0.65138	0.802808	0.7636	0.9102
Eicosanoid_14,15 LTE4 [M-H]	233290	-0.721654	0.6383	0.65149	0.904405	0.6100	0.7761
Putative_2-Hydroxypalmitic acid	518068	-0.799545	0.7066	0.65149	-0.432610	0.6769	0.9302
Eicosanoid_11t LTE4 [M-H+Acetate]	275412	0.950650	0.8468	0.65411	1.354274	0.6883	0.6316
EIC_29	354579	1.261585	1.1269	0.65411	0.454920	0.6953	0.9220
Eicosanoid_19(R)-HETE [M-H]	367701	0.668851	0.5959	0.65411	0.312749	0.5530	0.9302
Polar Molecule_PALMITATE [M-H+Acetate]	527462	1.341938	1.1979	0.65411	1.280187	1.2027	0.9102
Putative_1a-Methyl-5a-androstan-3a,17b-diol glucuronide	100107	-0.755218	0.6953	0.65820	-0.342094	0.6851	0.9302
Putative_Hydrocortisone	107173	0.607307	0.5607	0.65820	-1.017207	0.4965	0.6316
EIC_318	136905	0.625462	0.5853	0.65820	-0.318037	0.4796	0.9141
Eicosanoid_PGE3 [M-H+Acetate]	145653	0.641418	0.5967	0.65820	-0.142746	0.6100	0.9721
EIC_188	171462	-0.816875	0.7352	0.65820	-1.080959	0.6090	0.6776
Eicosanoid_13,14-dihydro-PGE1 [M-H]	195187	-0.726516	0.6772	0.65820	0.612172	0.6553	0.9102
EIC_156	253384	0.859558	0.8017	0.65820	0.824245	1.0351	0.9121
Docosanoid_7(S),17(S)-hydroxy DPA [M-H+Acetate]	263855	0.811483	0.7444	0.65820	-0.417209	0.6946	0.9302
EIC_225	266128	-0.879536	0.7958	0.65820	1.025048	0.6839	0.7761
Putative_1,3,5(10)-Estratrien-3,17b-diol 17-glucosiduronate	271516	-1.074626	0.9789	0.65820	-0.800120	0.7675	0.9102
Eicosanoid_7,17 dhDPA [M-H+Acetate]	286064	-0.546200	0.5046	0.65820	-0.819805	0.4264	0.6481
Bile Acid_Chenodeoxycholic acid [M-H+Acetate]	329139	2.384308	2.1536	0.65820	-0.607650	1.8693	0.9700
EIC_303	338181	0.872053	0.8001	0.65820	-0.009651	0.6843	0.9965
Novel EIC_10	347387	0.815142	0.7427	0.65820	-0.255166	0.6851	0.9626
Eicosanoid_18(+/-)-HETE [M-H+Acetate]	374735	-0.821656	0.7677	0.65820	-1.742625	1.6038	0.9102
EIC_343	395749	1.240285	1.1284	0.65820	-2.496908	1.2461	0.6316
Endocannabinoid_Oleoyl Ethanolamide [M-H+Acetate]	520172	-0.886153	0.8067	0.65820	-3.002750	1.7115	0.6874
FAHFA_11	520688	0.823274	0.7710	0.65820	0.135787	0.8047	0.9856
FAHFA_29	529339	0.698584	0.6500	0.65820	-0.492590	0.7144	0.9121
VLCDCA_1	532475	-0.827778	0.7569	0.65820	-0.588417	0.6897	0.9121
VLCDCA_45	534494	-0.873146	0.8126	0.65820	-1.046113	0.8921	0.8703
FFA_Heptadecanoic Acid† [M-H+Acetate]	534900	1.039227	0.9560	0.65820	0.841943	0.9438	0.9102
VLCDCA_14	540389	1.597507	1.4581	0.65820	-1.438811	1.0622	0.8132
Polar Molecule_CORTEXOLONE [M-H+Acetate]	159612	-0.632571	0.5999	0.66785	-1.140898	0.5801	0.6316
FAHFA_21	526086	-0.861419	0.8164	0.66785	0.040457	0.6833	0.9952
EIC_178	251262	-2.711792	2.5783	0.66855	-0.038658	2.7020	0.9965
FFA_Arachidic Acid† [M-H]	541489	0.875514	0.8341	0.66861	-0.646055	0.6960	0.9102
FFA_Linoleic Acid† [M-H+Acetate]	526555	1.550075	1.4857	0.67315	0.409804	1.6465	0.9706
Endocannabinoid_N-arachidonoyl Dopamine [M-H+Acetate]	518573	-0.716566	0.6913	0.67823	0.446747	0.6269	0.9121
Putative_1-Stearoyl-2-hydroxy-sn-glycero-3-phosphoethanolamine	525188	0.700683	0.6807	0.68359	0.386994	0.6817	0.9302
Eicosanoid_11-dehydro-TXB3 [M-H+Acetate]	146386	-0.455176	0.4454	0.68484	0.319672	0.4144	0.9121
EIC_314	153636	-1.315715	1.2948	0.68484	-2.112177	2.3390	0.9102
EIC_205	212224	0.700808	0.6890	0.68484	0.226528	0.4633	0.9302
EIC_205	215007	0.664309	0.6519	0.68484	0.014136	0.5768	0.9965
EIC_182	323049	1.067971	1.0477	0.68484	0.504003	0.8586	0.9302
VLCDCA_34	539456	-0.773002	0.7544	0.68484	-0.692822	0.7009	0.9102
Eicosanoid_5,6-EET [M-H]	473277	0.611643	0.6081	0.68961	0.510081	0.6640	0.9121
Eicosanoid_DHA [M-H+Acetate]	529467	0.701816	0.6979	0.68961	1.049189	0.6403	0.6949
Eicosanoid_13,14-dihydro-15-keto-tetranor-PGF1alpha [M-H+Acetate]	125021	0.766510	0.7654	0.69197	1.256240	0.6360	0.6316
Eicosanoid_Arachidonic Acid [M-H+Acetate]	531873	0.921593	0.9236	0.69360	1.875801	0.8930	0.6316
VLCDCA_38	530224	-0.728280	0.7318	0.69426	-0.838008	0.7191	0.8703
FFA_Heptadecaenoic Acid† [M-H+Acetate]	529424	-0.732887	0.7387	0.69544	-0.041392	0.6979	0.9952
Polar Molecule_LUMICHROME [M-H]	51894	0.938996	0.9500	0.69735	-0.501639	0.7525	0.9141
Bile Acid_Glycochenodeoxycholic Acid [M-H]	251495	3.042170	3.1103	0.70405	-2.148813	0.7987	0.5786
Putative_Monolinolenin (9c,12c,15c)	343482	0.658087	0.6719	0.70405	0.828433	0.6179	0.8132
Eicosanoid_EPA [M-H+Acetate]	523035	0.592922	0.6080	0.70496	0.457723	0.5709	0.9121
Bile Acid_Glycoursodeoxycholic Acid [M-H]	166774	0.950713	0.9826	0.71019	-0.609415	0.6938	0.9102
FFA_Oleic Acid† [M-H+Acetate]	531868	0.773504	0.8004	0.71019	1.508037	0.7651	0.6316
EIC_14	387514	1.133337	1.1773	0.71208	-1.967712	0.8831	0.6316
Eicosanoid_14,15 LTC4 [M-H]	264928	1.732676	1.8187	0.71221	2.967262	1.8637	0.7345
EIC_169	349398	0.788687	0.8250	0.71221	0.825184	0.6566	0.8220
EIC_185	397724	-0.731437	0.7621	0.71221	-0.131706	0.6505	0.9799
FAHFA_18	522272	-0.698496	0.7318	0.71221	0.793636	0.8604	0.9102
FFA_Eicosenoic Acid [M-H]	531994	-0.727532	0.7611	0.71221	-0.279319	0.8724	0.9700
Eicosanoid_13,14-dihydro-15-keto-tetranor-PGF1alpha [M-H+Acetate]	129125	0.668395	0.7099	0.71229	1.921655	0.6318	0.5786
Novel EIC_3	375923	-0.926789	0.9833	0.71229	-1.024300	0.8445	0.8346
VLCDCA_17	534730	-0.962842	1.0233	0.71229	0.153637	0.9417	0.9856
Polar Molecule_NERVONATE [M-H+Acetate]	536198	1.052046	1.1180	0.71229	-1.526704	0.7492	0.6316
Putative_Oxymorphone 3-b-D-glucuronide	90626	-1.391658	1.4753	0.71229	1.737671	1.1595	0.7761
EIC_77	435704	0.938714	1.0099	0.72026	-0.148604	1.0324	0.9856
Eicosanoid_EPA [M-H]	523009	0.549428	0.5950	0.72259	0.260929	0.5450	0.9302
FFA_Eicosadienoic Acid† [M-H+Acetate]	531329	1.469581	1.5881	0.72259	2.675328	1.6732	0.7313
EIC_303	328235	0.714095	0.7764	0.72298	-0.296340	0.8626	0.9700
Eicosanoid_tetranor 12(R) HETE [M-H]	331464	0.709387	0.7717	0.72298	-0.539484	0.7575	0.9121
Docosanoid_Resolvin E1 [M-H+Acetate]	110221	0.670761	0.7353	0.72370	0.344754	0.6210	0.9302
EIC_178	245971	-1.720096	1.8841	0.72370	-1.514997	1.5180	0.9102
VLCDCA_15	533973	0.783909	0.8606	0.72370	-0.094280	0.7754	0.9856
Endocannabinoid_Oleoyl Ethanolamide [M-H+Acetate]	522175	0.608387	0.6717	0.72504	-0.063146	0.8633	0.9942
FFA_Oleic Acid† [M-H]	531847	0.734153	0.8097	0.72504	1.217313	0.7381	0.6949
Putative_11a-Hydroxyprogesterone b-D-glucuronide	282628	-0.814803	0.9073	0.72780	-0.674779	0.9135	0.9121
EIC_224	295140	0.563693	0.6348	0.72780	-0.576798	0.6011	0.9102
EIC_91	326677	-0.724071	0.8093	0.72780	-1.599779	0.7335	0.6316
EIC_9	408763	-0.724770	0.8132	0.72780	-0.627309	0.9017	0.9121
Bile Acid_Lithocholic Acid [M-H+Acetate]	441749	-0.809745	0.9007	0.72780	-0.976573	0.8256	0.8601
FAHFA_11	521853	-0.937577	1.0489	0.72780	-1.117447	1.2864	0.9121
FFA_Palmitic Acid† [M-H]	533569	-0.494814	0.5572	0.72780	0.078755	0.6492	0.9856
FFA_Docosaenoic Acid† [M-H+Acetate]	535281	0.870593	0.9750	0.72780	0.763300	0.9250	0.9121
Bile Acid_Glycoursodeoxycholic Acid [M-H+Acetate]	181294	-0.777729	0.8779	0.72802	-0.149912	0.5968	0.9706
FFA_a-linolenic Acid† [M-H+Acetate]	520570	0.657360	0.7465	0.72941	0.288173	0.6659	0.9452
Eicosanoid_DHA [M-H]	525743	-0.604782	0.6881	0.72941	0.327154	0.7106	0.9334
FFA_Dihomo-g-linolenic† [M-H]	530664	-0.502409	0.5699	0.72941	0.569775	0.6981	0.9121
Docosanoid_7(S),17(S)-hydroxy DPA [M-H+Acetate]	283207	-0.813890	0.9284	0.72990	-0.643376	0.8163	0.9121
Polar Molecule_PALMITATE [M-H+Acetate]	529748	0.660577	0.7553	0.73011	-0.501726	0.6403	0.9121
Putative_5a-Androstan-3a,17b-diol-17b-glucuronide	150234	-0.778293	0.9036	0.73329	-0.558251	0.7744	0.9121
Putative_5a-Androstan-17b-ol-3-one glucosiduronate	201784	-1.349971	1.5549	0.73329	-0.036573	0.9650	0.9965
Putative_7a,17a-Dimethyl-5b-androstane-3a,17b-diol glucuronide	210760	-1.047731	1.2099	0.73329	-1.268654	1.6509	0.9121
EIC_55	297605	0.640775	0.7438	0.73329	0.050773	0.7938	0.9952
EIC_111	454288	-0.603879	0.7019	0.73329	0.663417	0.8085	0.9121
VLCDCA_17	532189	-0.862823	1.0019	0.73329	-0.742573	1.0170	0.9121
Putative_Heneicosapentaenoic acid	524788	-0.915946	1.0694	0.73540	1.165148	0.9420	0.8297
Putative_5a-Androstan-3a,17b-diol-17b-glucuronide	159009	-0.707156	0.8345	0.73624	-0.720714	0.8987	0.9121
Eicosanoid_14,15-diHETrE [M-H+Acetate]	323938	1.442343	1.7114	0.73624	0.263675	1.4420	0.9841
EIC_122	358178	0.842425	0.9894	0.73624	-0.901458	0.9635	0.9102
EIC_189	386159	0.944063	1.1121	0.73624	0.482719	0.9758	0.9302
FAHFA_48	529646	0.725112	0.8533	0.73624	0.957187	1.0117	0.9102
FAHFA_57	531915	1.489768	1.7660	0.73624	2.108154	1.5770	0.8132
FFA_Arachidic Acid† [M-H+Acetate]	537842	0.650922	0.7721	0.73624	0.518178	0.7575	0.9121
Eicosanoid_15S-HpETE [M-H]	407687	0.677358	0.8118	0.74302	0.751922	0.7162	0.9102
FFA_Arachidic Acid† [M-H]	537803	0.752254	0.9036	0.74308	0.298405	0.7960	0.9623
EIC_88	373969	0.782876	0.9462	0.74648	0.466201	0.8433	0.9302
Eicosanoid_13,14-dihydro-15-keto-tetranor-PGD2 [M-H+Acetate]	125018	-0.601271	0.7403	0.75369	0.007981	0.6708	0.9965
Eicosanoid_12-oxoETE [M-H]	423400	-0.550902	0.6731	0.75369	0.229908	0.7218	0.9700
Eicosanoid_5,6-EET [M-H]	469222	-0.471739	0.5815	0.75369	0.526195	0.5712	0.9102
Endocannabinoid_N-oleoyl Dopamine [M-H]	529004	0.635039	0.7791	0.75369	0.758847	0.7883	0.9102
FFA_Docosadienoic Acid† [M-H]	534554	0.659789	0.8116	0.75369	1.125171	0.8756	0.8220
FFA_Docosaenoic Acid† [M-H]	535834	0.977442	1.2143	0.75836	-1.313725	1.0665	0.8297
Polar Molecule_Tetrahydrocortisol [M-H+Acetate]	123097	-0.730260	0.9113	0.75994	-0.878748	0.8377	0.9102
FFA_Eicosadienoic Acid† [M-H]	531992	-0.482190	0.6029	0.75994	0.673956	0.6287	0.9102
Docosanoid_osbond acid, all-cis-4,7,10,13,16-DPA [M-H]	528114	-0.509373	0.6390	0.76076	1.705259	0.6240	0.5786
Polar Molecule_N-ACETYLTRYPTOPHAN [M-H]	45049	0.652755	0.8215	0.76160	-1.550043	0.7539	0.6316
VLCDCA_14	541584	0.991049	1.2557	0.76336	-0.375858	0.9062	0.9488
VLCDCA_28	542127	0.608527	0.7709	0.76336	-0.009589	0.6652	0.9965
Polar Molecule_CORTISOL [M-H+Acetate]	100025	0.488244	0.6439	0.77179	-0.667760	0.5119	0.8220
Polar Molecule_CORTISOL [M-H]	111875	0.789649	1.0622	0.77179	-1.087516	0.8297	0.8220
Polar Molecule_CORTISONE [M-H]	112369	-0.449698	0.5930	0.77179	0.172419	0.5322	0.9700
Polar Molecule_CORTISONE [M-H+Acetate]	112455	-0.486332	0.6384	0.77179	0.116033	0.5732	0.9799
Putative_Codeine-6-b-D-glucuronide	119896	1.632790	2.1897	0.77179	2.807907	1.9320	0.7782
Eicosanoid_11-dehydro-2,3-dinor-TXB2 [M-H+Acetate]	128452	0.603920	0.8001	0.77179	-0.387516	0.7646	0.9302
Novel EIC_35	134247	0.428259	0.5661	0.77179	-0.416924	0.7589	0.9302
EIC_354	155807	0.710760	0.9534	0.77179	-0.666468	0.9837	0.9121
Putative_7a,17a-Dimethyl-5b-androstane-3a,17b-diol glucuronide	203097	-1.456092	1.9326	0.77179	-1.124234	1.9582	0.9302
EIC_177	263648	0.663030	0.8727	0.77179	0.207051	0.7473	0.9706
EIC_358	269922	-0.525964	0.6872	0.77179	-0.970026	0.6382	0.7761
EIC_177	274066	-0.813919	1.0858	0.77179	0.207964	0.8195	0.9706
EIC_150	301803	0.409236	0.5412	0.77179	0.180584	0.6056	0.9706
Eicosanoid_15d PGJ2 [M-H]	364207	-0.474770	0.6316	0.77179	0.183027	0.5733	0.9700
EIC_82	445680	-0.460889	0.5955	0.77179	-0.129524	0.5387	0.9706
Putative_N-oleoyl taurine	497820	-0.453626	0.6057	0.77179	-0.151548	0.5941	0.9706
FFA_Myristic Acid [M-H]	520512	0.574698	0.7658	0.77179	-2.039480	1.2226	0.6949
Putative_Bilirubin	528314	-0.610334	0.8128	0.77179	0.423232	0.6708	0.9302
Polar Molecule_VITAMIN D2 [M-H]	531344	0.667866	0.8628	0.77179	0.850253	0.8653	0.9102
FFA_Stearic Acid† [M-H+Acetate]	534421	0.596844	0.8029	0.77179	0.824417	0.9877	0.9121
Eicosanoid_13,14-dihydro-PGE1 [M-H]	189965	-0.709249	0.9569	0.77219	-1.195881	0.9397	0.8220
EIC_26	441431	0.559972	0.7597	0.77459	0.187840	0.7583	0.9706
FFA_a-linolenic Acid† [M-H]	520524	0.517178	0.7035	0.77477	0.371299	0.6310	0.9302
FFA_Palmitic Acid† [M-H+Acetate]	531996	0.459491	0.6355	0.78347	0.595432	0.8338	0.9121
FFA_Oleic Acid† [M-H]	535786	-0.531328	0.7333	0.78347	0.381821	0.7397	0.9302
Eicosanoid_PGF1a [M-H]	164760	0.428416	0.5994	0.79014	-0.027677	0.5698	0.9965
Putative_7a,17a-Dimethyl-5b-androstane-3a,17b-diol glucuronide	199356	-1.223608	1.7257	0.79377	-2.238193	2.1411	0.9102
Polar Molecule_NERVONATE [M-H]	537448	0.606775	0.8574	0.79377	1.407451	0.8483	0.6949
EIC_189	389030	-0.497667	0.7068	0.79565	0.152245	0.7142	0.9749
Putative_Monolinolenin (9c,12c,15c)	341483	-0.361947	0.5195	0.80140	0.504641	0.5086	0.9102
Endocannabinoid_N-arachidonoyl Dopamine [M-H]	515028	-0.556194	0.8041	0.80479	0.431916	0.8693	0.9302
EIC_250	195182	-0.441346	0.6443	0.80496	0.083622	0.6132	0.9856
Sterol_11-Deoxycorticosterone [M-H+Acetate]	228510	-0.421348	0.6113	0.80496	0.476976	0.6368	0.9121
Eicosanoid_5,6-EET [M-H+Acetate]	470913	0.744603	1.0880	0.80496	-0.974399	0.7917	0.8297
FFA_a-linolenic Acid† [M-H]	521670	-0.546402	0.7982	0.80496	-0.123511	0.9195	0.9856
Eicosanoid_PGF1a [M-H]	171489	-0.575271	0.8442	0.80622	0.194718	0.7125	0.9706
Putative_Hydrocortisone 21-hemisuccinate	111837	0.648727	0.9658	0.80946	-0.996690	0.7880	0.8220
Novel EIC_35	136210	0.441488	0.6662	0.80946	-0.911430	0.6551	0.8125
EIC_229	184258	0.399709	0.5977	0.80946	0.226496	0.5341	0.9465
Bile Acid_Ursodeoxycholic acid [M-H]	245404	-0.850212	1.2852	0.80946	-2.116714	1.4426	0.7761
Eicosanoid_13(S) HOTrE(y) [M-H+Acetate]	377311	0.559865	0.8520	0.80946	0.625514	0.9711	0.9302
EIC_105	382736	0.422970	0.6302	0.80946	0.664422	0.5846	0.8969
EIC_189	392686	0.439391	0.6664	0.80946	0.796908	0.5804	0.8132
Eicosanoid_11-HETE [M-H+Acetate]	423143	0.525945	0.8004	0.80946	-0.847008	0.7137	0.8588
Putative_N-Oleoyl-L-serine	517674	0.447108	0.6716	0.80946	0.394265	0.7180	0.9302
Endocannabinoid_D-erythro-Sphingosine C-18 [M-H+Acetate]	518988	-0.506411	0.7650	0.80946	-0.227894	0.8545	0.9706
FFA_Heptadecaenoic Acid† [M-H]	531845	-0.425774	0.6311	0.80946	-0.244549	0.7136	0.9700
VLCDCA_17	532515	-0.461207	0.6910	0.80946	-0.842244	0.7647	0.9102
EIC_139	211121	0.698132	1.0696	0.81038	-1.110382	0.9085	0.8297
VLCDCA_12	535370	-0.456871	0.6998	0.81038	-0.161903	0.8259	0.9826
Docosanoid_7(S),17(S)-hydroxy DPA [M-H+Acetate]	275325	-0.415920	0.6541	0.81752	0.666621	0.7408	0.9102
Eicosanoid_13-oxoODE [M-H+Acetate]	408537	-0.584705	0.9205	0.81752	-0.004244	0.9633	0.9965
EIC_31	411585	-0.527118	0.8247	0.81752	-0.962954	0.8895	0.9102
Putative_Decylbenzenesulfonic acid	418979	0.910729	1.4288	0.81752	-1.175260	1.1310	0.9102
FFA_Eicosenoic Acid [M-H]	534395	0.477171	0.7437	0.81752	0.598324	0.7240	0.9121
Bile Acid_Glycochenodeoxycholic Acid [M-H]	247605	0.696550	1.1072	0.82068	-1.644326	0.8138	0.6316
EIC_10	440807	1.779002	2.8538	0.82068	-0.521865	0.5559	0.9102
FFA_a-linolenic Acid† [M-H]	523928	-0.398975	0.6387	0.82068	0.218769	0.7394	0.9706
FAHFA_37	528301	0.462905	0.7386	0.82068	1.242811	0.6467	0.6481
FFA_Tricosenoic Acid [M-H+Acetate]	536191	0.451553	0.7232	0.82068	0.532767	0.6114	0.9121
Eicosanoid_10-Nitrooleate [M-H]	510123	0.368387	0.5958	0.82408	0.318659	0.5464	0.9302
EIC_146	251251	-0.602274	0.9850	0.82925	0.221634	0.9967	0.9736
Putative_Codeine-6-b-D-glucuronide	111091	1.338769	2.2212	0.83026	2.380690	1.8583	0.8220
Eicosanoid_8-iso-15-keto-PGE2 [M-H+Acetate]	178102	-0.355244	0.5955	0.83026	-0.041762	0.6201	0.9948
Novel EIC_6	221883	-0.435473	0.7276	0.83026	-2.166150	1.2411	0.6928
EIC_146	245286	-0.702950	1.1734	0.83026	-0.194719	0.8461	0.9721
EIC_135	316724	0.711146	1.1897	0.83026	-0.744581	1.0069	0.9121
Eicosanoid_12-HETE [M-H+Acetate]	425444	0.568277	0.9435	0.83026	-0.529748	0.9173	0.9302
FAHFA_42	531450	-0.487957	0.8105	0.83026	-0.209728	0.8251	0.9706
Putative_2a-Methyl-5a-androstan-3a-ol-17-one glucuronide	92507	0.533733	0.8902	0.83026	-0.134767	0.7083	0.9837
Polar Molecule_CORTISOL [M-H+Acetate]	111953	0.603347	1.0191	0.83304	-1.126507	0.8015	0.8013
Docosanoid_7,8-DiHDPA [M-H]	364273	-0.379963	0.6441	0.83344	0.395089	0.5081	0.9121
FFA_Adrenic Acid† [M-H]	528116	-0.418954	0.7161	0.83488	1.677174	0.6824	0.5786
Eicosanoid_11(12)-EpETE [M-H+Acetate]	421573	-0.550637	0.9455	0.83584	-0.638600	0.7958	0.9121
EIC_87	390659	-0.433392	0.7549	0.84244	-0.303842	0.6310	0.9302
EIC_209	228440	-0.303870	0.5369	0.84891	-0.478081	0.4653	0.9102
Eicosanoid_PGF1a [M-H]	167096	-0.404254	0.7219	0.84963	0.451638	0.4959	0.9102
Novel EIC_6	233564	-0.434122	0.7750	0.84963	1.326455	0.7257	0.6776
FFA_Tricosenoic Acid [M-H+Acetate]	537869	0.462778	0.8246	0.84963	0.388227	0.5408	0.9121
FFA_Myristic Acid [M-H]	524668	0.437008	0.7829	0.84974	0.348063	0.8363	0.9488
EIC_229	199695	-0.349844	0.6301	0.85023	-0.132790	0.5051	0.9706
EIC_144	256466	0.451227	0.8154	0.85023	-0.329139	0.9746	0.9700
FFA_Myristic Acid [M-H+Acetate]	524395	0.509162	0.9245	0.85023	0.554772	1.0200	0.9302
VLCDCA_26	539195	-0.363789	0.6590	0.85023	-1.413188	0.6852	0.6316
VLCDCA_11	534221	0.425750	0.7800	0.85346	-0.464118	0.6894	0.9121
Putative_4-Androsten-17b-ol-3-one glucosiduronate	158439	0.543025	1.0208	0.86203	0.964525	0.7099	0.8132
Putative_3-Hydroxystanozolol glucuronide	271639	-0.593344	1.1149	0.86203	0.820146	0.9868	0.9121
EIC_122	365097	0.695661	1.3221	0.86203	-1.101392	1.1325	0.9102
EIC_106	378136	-0.564070	1.0679	0.86203	-1.285735	0.9844	0.8220
EIC_185	398537	-0.405044	0.7567	0.86203	-0.722636	0.6438	0.9102
Bile Acid_Lithocholic Acid [M-H]	442558	0.535953	1.0147	0.86203	-0.700829	1.0545	0.9141
Polar Molecule_Tetrahydrocortisol [M-H+Acetate]	138195	0.350180	0.6837	0.86741	-0.031122	0.6843	0.9965
EIC_58	348012	1.534724	3.0126	0.86741	-0.248231	1.6554	0.9856
Endocannabinoid_2-Arachidonyl glycerol ether [M-H+Acetate]	526318	-0.470596	0.9200	0.86741	0.256514	1.0593	0.9706
FAHFA_58	531777	0.854802	1.6743	0.86741	1.427002	1.6564	0.9121
VLCDCA_32	537601	-0.437008	0.8497	0.86741	-0.703679	0.7337	0.9102
FFA_Eicosatrienoic Acid† [M-H+Acetate]	534431	0.340038	0.6698	0.86747	1.261132	0.7585	0.6949
Novel EIC_44	186232	-0.312608	0.6335	0.87593	-1.084327	0.7121	0.7761
Bile Acid_Ursodeoxycholic acid [M-H+Acetate]	232137	0.470240	0.9517	0.87593	0.677750	1.0074	0.9121
FFA_Stearic Acid† [M-H+Acetate]	533106	0.363239	0.7379	0.87593	-0.015524	0.7495	0.9965
Docosanoid_MCTR2 [M-H]	208505	0.403972	0.8265	0.87770	1.098194	0.7416	0.7761
Putative_Tauroursodeoxycholic acid	181279	0.566477	1.1651	0.87853	-0.426404	1.3325	0.9700
EIC_351	175055	0.314063	0.6536	0.88227	-0.290641	0.5394	0.9302
EIC_1	310243	-0.560933	1.1711	0.88227	-1.275942	1.5332	0.9121
EIC_15	409677	0.372096	0.7876	0.88532	-1.672671	1.0170	0.6949
Putative_D-erythro-Sphingosine-1-phosphate	377404	-0.364242	0.7830	0.89084	0.214131	0.5877	0.9653
VLCDCA_42	540422	0.351778	0.7614	0.89224	-0.546255	0.7071	0.9121
VLCDCA_14	537555	-0.396173	0.8678	0.89602	-0.699297	0.7546	0.9102
Eicosanoid_17,18-DiHETE [M-H+Acetate]	268636	-0.295104	0.6623	0.90280	-0.145863	0.6702	0.9736
VLCDCA_2	534195	0.330793	0.7442	0.90280	-0.638220	0.6833	0.9102
Sterol_Estrone [M-H+Acetate]	202817	0.791333	1.7904	0.90356	0.326478	0.9798	0.9700
Polar Molecule_CORTEXOLONE [M-H+Acetate]	155822	0.431151	0.9922	0.90553	-1.443755	0.8823	0.6949
Novel EIC_6	229056	0.273883	0.6267	0.90553	-0.709708	0.6138	0.8769
Novel EIC_6	234484	-0.245127	0.5634	0.90553	0.202156	0.5156	0.9623
Eicosanoid_15-epi-PGA1 [M-H+Acetate]	244131	0.323656	0.7474	0.90553	0.207192	0.7603	0.9706
FFA_Pentadecanoic Acid† [M-H+Acetate]	531478	-0.362297	0.8480	0.90613	0.577700	1.0556	0.9302
FFA_Eicosenoic Acid [M-H]	539066	-0.294876	0.6894	0.90613	0.691683	0.6755	0.9102
Novel EIC_13	423715	-0.291119	0.6876	0.90821	-0.273023	0.8131	0.9700
Eicosanoid_15-epi-PGA1 [M-H+Acetate]	253524	0.275146	0.6578	0.91007	0.311893	0.5275	0.9302
Polar Molecule_ELAIDATE [M-H]	527169	1.460672	3.4940	0.91007	2.851184	4.5694	0.9302
EIC_263	208281	0.223742	0.5458	0.91183	-0.342656	0.5692	0.9302
Endocannabinoid_N-oleoyl Dopamine [M-H]	528189	-0.321075	0.7844	0.91183	0.156181	0.8482	0.9841
FFA_Heptadecanoic Acid† [M-H]	534537	0.278160	0.6764	0.91183	0.077018	0.7855	0.9864
VLCDCA_8	537536	0.392448	0.9544	0.91183	-0.491869	0.8694	0.9302
Novel EIC_1	405831	0.334428	0.8224	0.91192	0.529595	0.7835	0.9121
Polar Molecule_PALMITOLEATE [M-H]	521338	-0.358183	0.8827	0.91192	1.106897	0.8745	0.8220
Bile Acid_Ursodeoxycholic acid [M-H]	232041	0.407127	1.0235	0.91452	0.535888	1.0913	0.9302
EIC_122	368273	0.414261	1.0547	0.91452	-0.493360	0.9483	0.9302
Eicosanoid_15 oxoEDE [M-H+Acetate]	474392	-0.337222	0.8565	0.91452	0.087567	0.8373	0.9856
Polar Molecule_PALMITOLEATE [M-H+Acetate]	520124	0.303430	0.7657	0.91452	-1.545473	1.2370	0.8220
VLCDCA_44	547731	-0.330833	0.8248	0.91452	-0.170183	0.7396	0.9721
Putative_1a-Methyl-5a-androstan-3a,17b-diol glucuronide	108971	0.261684	0.7058	0.91672	-0.191739	0.8649	0.9736
Polar Molecule_LIOTHYRONINE [M-H]	116699	0.313859	0.8381	0.91672	-0.088516	0.6512	0.9856
Novel EIC_40	183709	-0.226223	0.6290	0.91672	-0.224597	0.6090	0.9645
EIC_333	191164	-0.260819	0.6752	0.91672	0.253324	0.6717	0.9623
EIC_205	221256	0.244215	0.6629	0.91672	-0.557475	0.6154	0.9102
EIC_83	344675	0.204108	0.5757	0.91672	0.087899	0.4946	0.9856
Eicosanoid_20cooh AA [M-H]	356342	0.276105	0.7772	0.91672	-0.275283	0.5465	0.9302
Eicosanoid_12S-HpEPE [M-H]	382329	-0.247284	0.6672	0.91672	-0.244435	0.6683	0.9653
Bile Acid_Lithocholic Acid [M-H]	441724	0.266743	0.7011	0.91672	0.067755	0.6739	0.9857
Eicosanoid_14,15-EET [M-H+Acetate]	444412	-0.300235	0.8377	0.91672	-2.021926	1.2854	0.7564
EIC_102	446037	-0.236294	0.6456	0.91672	0.003647	0.6717	0.9965
FAHFA_8	518912	-0.296984	0.7860	0.91672	0.529686	0.6876	0.9121
FFA_Palmitoleic Acid† [M-H+Acetate]	523988	0.380416	1.0431	0.91672	-1.493993	0.8457	0.6776
Putative_1-Arachidoyl-2-hydroxy-sn-glycero-3-phosphocholine	525258	0.204350	0.5762	0.91672	0.155257	0.7734	0.9799
FAHFA_28	527378	0.249505	0.6772	0.91672	1.358054	0.7239	0.6481
FFA_Palmitoleic Acid† [M-H+Acetate]	529152	-0.331727	0.9177	0.91672	-0.839126	0.8909	0.9102
FFA_Docosatrienoic Acid† [M-H]	532415	-0.252023	0.6829	0.91672	0.935205	0.7366	0.8220
VLCDCA_2	533159	-0.306335	0.7942	0.91672	0.410002	0.7629	0.9302
VLCDCA_23	534469	-0.272363	0.7561	0.91672	-1.038599	0.6866	0.7761
VLCDCA_7	542382	0.330219	0.8611	0.91672	0.677764	0.8112	0.9121
EIC_138	201561	-0.288149	0.8465	0.92205	-0.447400	0.7266	0.9302
Polar Molecule_BIOTIN [M-H]	31198	0.229173	0.6727	0.92205	-0.520892	0.7668	0.9121
FFA_Palmitic Acid† [M-H+Acetate]	531306	-0.297736	0.8711	0.92205	0.378051	0.8299	0.9352
Eicosanoid_Adrenic Acid [M-H]	532126	-0.225963	0.6534	0.92205	0.391525	0.7813	0.9302
VLCDCA_40	537628	0.329945	0.9679	0.92205	-0.660568	0.7323	0.9102
Polar Molecule_LUMICHROME [M-H]	57910	-0.785522	2.3232	0.92262	-1.532987	1.3172	0.8703
VLCDCA_6	534200	0.252629	0.7736	0.93196	-0.234190	0.7143	0.9700
Putative_4-Androsten-17b-ol-3-one glucosiduronate	153131	0.326598	1.0548	0.93366	0.403778	0.7957	0.9302
Polar Molecule_CORTEXOLONE [M-H]	153590	-0.248127	0.8148	0.93366	-1.310955	0.7887	0.6949
Sterol_11-keto-testosterone [M-H+Acetate]	157340	-0.183000	0.7536	0.93366	-0.403501	0.7340	0.9302
Bile Acid_Glycoursodeoxycholic Acid [M-H]	173155	0.436328	1.8288	0.93366	-0.766008	1.4632	0.9302
Eicosanoid_PGF1a [M-H]	174973	0.240019	0.7686	0.93366	1.105302	0.6117	0.6776
EIC_250	186140	0.248816	0.8806	0.93366	0.068680	0.7467	0.9871
EIC_250	191117	-0.153300	0.6153	0.93366	0.534048	0.5917	0.9102
EIC_138	191819	0.365933	1.3780	0.93366	-0.273526	1.1053	0.9706
EIC_158	238213	-2.231726	7.9366	0.93366	1.583158	5.4825	0.9706
Eicosanoid_15-epi-PGA1 [M-H+Acetate]	248240	-0.220166	0.7881	0.93366	0.340055	0.8414	0.9564
EIC_177	262111	0.171180	0.6020	0.93366	-0.085608	0.5731	0.9856
EIC_358	264609	0.157260	0.6443	0.93366	-0.286658	0.6013	0.9302
Putative_11a-Hydroxyprogesterone b-D-glucuronide	269360	0.256741	1.0022	0.93366	-1.588696	1.1147	0.7985
EIC_251	297013	0.269566	1.0758	0.93366	0.441349	1.0491	0.9465
EIC_271	297019	-0.156977	0.6503	0.93366	0.292575	0.7558	0.9623
EIC_224	298220	0.223429	0.8801	0.93366	-0.845951	1.0513	0.9121
Eicosanoid_12-HHTrE [M-H+Acetate]	332750	-0.693532	2.8144	0.93366	-0.380656	3.0209	0.9856
EIC_83	335777	0.246241	0.9058	0.93366	-1.343936	1.2593	0.9102
EIC_6	357386	0.184874	0.6974	0.93366	-0.345564	0.6899	0.9302
Docosanoid_7,8-DiHDPA [M-H+Acetate]	364346	-0.277393	0.9221	0.93366	-0.356556	0.7367	0.9302
Eicosanoid_15d PGJ2 [M-H]	364658	-0.231721	0.7979	0.93366	1.537337	0.8415	0.6776
EIC_87	387542	0.165954	0.6649	0.93366	-0.271905	0.6408	0.9465
EIC_104	401285	0.244991	0.9068	0.93366	0.073676	0.6528	0.9856
EIC_192	402518	-0.161610	0.6680	0.93366	0.278794	0.6020	0.9334
Eicosanoid_5S-HpEPE [M-H+Acetate]	402588	-0.211963	0.7288	0.93366	-0.984289	0.7013	0.8013
Eicosanoid_14(15) EpETE [M-H]	408497	-0.164948	0.5756	0.93366	0.372379	0.5075	0.9121
EIC_191	412743	0.198956	0.7124	0.93366	0.193391	0.5972	0.9700
Eicosanoid_11(12)-EpETE [M-H]	416960	0.192538	0.6055	0.93366	0.345007	0.4996	0.9121
Putative_1-Palmitoyl-2-hydroxy-sn-glycero-3-phosphoethanolamine	452730	-0.334116	1.2337	0.93366	-0.895011	1.0891	0.9121
Eicosanoid_EPA [M-H]	518723	-0.185875	0.6797	0.93366	0.440032	0.5814	0.9121
Putative_1-Stearoyl-2-hydroxy-sn-glycero-3-phosphoethanolamine	519992	0.219892	0.7837	0.93366	-1.846638	1.4045	0.8220
FAHFA_12	520493	-0.139438	0.5754	0.93366	0.616693	0.6202	0.9102
Eicosanoid_DHA [M-H]	523275	-0.277476	0.9465	0.93366	0.138846	1.2254	0.9856
Polar Molecule_OLEOYL-GLYCEROL [M-H+Acetate]	527254	-0.224687	0.8055	0.93366	0.322394	0.8378	0.9623
Eicosanoid_Arachidonic Acid [M-H]	527450	0.191645	0.6926	0.93366	1.468290	0.6315	0.6272
FFA_Myristic Acid [M-H]	527646	0.192397	0.7482	0.93366	-0.427321	0.6403	0.9141
FAHFA_27	528052	-0.219727	0.7173	0.93366	0.432360	0.7728	0.9302
Eicosanoid_Arachidonic Acid [M-H]	529143	-0.150108	0.5789	0.93366	1.377487	0.7201	0.6481
Endocannabinoid_Stearoyl Ethanolamide [M-H+Acetate]	530121	-0.225890	0.7583	0.93366	-0.738370	0.6138	0.8443
Eicosanoid_Arachidonic Acid [M-H]	531480	-0.181131	0.6734	0.93366	0.551615	0.6150	0.9102
FFA_Arachidic Acid† [M-H+Acetate]	534912	0.285871	0.9455	0.93366	0.009663	0.8346	0.9965
FFA_Arachidic Acid† [M-H]	535084	-0.277255	1.0133	0.93366	-0.293430	0.9537	0.9706
VLCDCA_6	535897	-0.202609	0.6822	0.93366	-1.060558	0.6512	0.6949
VLCDCA_41	540711	0.291696	1.0177	0.93366	-0.252154	0.8835	0.9706
VLCDCA_42	544630	-0.180237	0.7347	0.93366	-0.665177	0.7110	0.9102
Polar Molecule_LUMICHROME [M-H]	63608	-0.647905	2.2095	0.93366	-0.923817	1.4472	0.9302
Eicosanoid_15 oxoEDE [M-H]	479072	-0.175992	0.7469	0.93461	-0.117602	0.7064	0.9856
EIC_158	232601	0.209374	0.9021	0.93545	-0.323492	0.9468	0.9700
Putative_1-Palmitoyl-2-hydroxy-sn-glycero-3-phosphoethanolamine	444474	0.161331	0.7029	0.93545	-0.626437	0.5956	0.9102
Eicosanoid_DHA [M-H]	529758	-0.147834	0.6484	0.93545	1.687151	0.8137	0.6316
Polar Molecule_OLEOYL-GLYCEROL [M-H]	531324	0.246741	1.0818	0.93545	-0.516996	0.7551	0.9121
EIC_4	345300	-0.111624	0.5146	0.94081	-0.316224	0.7137	0.9439
FFA_Stearidonic Acid [M-H+Acetate]	487076	0.314523	1.4486	0.94081	-1.803431	1.7366	0.9102
FAHFA_69	542169	-0.167868	0.7674	0.94081	-0.547834	0.7135	0.9121
EIC_24	422518	-0.241868	1.1417	0.94380	-1.093979	0.8863	0.8297
EIC_146	239745	0.119857	0.5742	0.94507	-0.282422	0.4489	0.9302
EIC_185	397318	-0.233906	1.1739	0.94696	-0.957632	0.6632	0.7806
FFA_Stearidonic Acid [M-H]	488156	-0.336910	1.7143	0.94696	-1.364330	1.5519	0.9102
FAHFA_4	509868	-0.288292	1.4673	0.94696	-0.567694	1.5156	0.9623
FAHFA_13	525986	0.157586	0.7979	0.94696	-0.134971	1.0360	0.9856
VLCDCA_10	534972	0.186796	0.9264	0.94696	-0.352189	0.7166	0.9302
VLCDCA_40	540421	-0.213455	1.0637	0.94696	-1.856271	1.2027	0.7761
Polar Molecule_CORTISONE [M-H+Acetate]	118213	0.127676	0.7188	0.95147	-0.277756	0.7228	0.9623
Putative_Androstan-3-ol-17-one 3-glucuronide	167264	-0.152257	0.8138	0.95147	-0.806620	0.7347	0.9102
EIC_166	353621	0.179994	1.0326	0.95147	0.199061	0.7490	0.9706
Putative_Dodecylbenzenesulfonic acid	403895	0.162024	0.9052	0.95147	-0.631846	0.8473	0.9121
Putative_Levofloxacin	41558	-0.105280	0.5723	0.95147	-0.103201	0.5329	0.9832
Novel EIC_18	420737	0.121656	0.6962	0.95147	0.393492	0.5488	0.9121
Novel EIC_33	460414	-0.189753	1.0683	0.95147	0.777068	0.8284	0.9102
Eicosanoid_Arachidonic Acid [M-H]	525365	-0.116299	0.6613	0.95147	0.082219	0.7215	0.9856
FFA_Linoleic Acid† [M-H]	528366	0.112683	0.6047	0.95147	0.771002	0.5675	0.8132
FFA_Heptadecaenoic Acid† [M-H+Acetate]	532672	-0.140067	0.8000	0.95147	0.232096	1.0628	0.9736
FFA_Docosadienoic Acid† [M-H]	536158	-0.177506	1.0272	0.95147	0.418886	0.9017	0.9334
FAHFA_27	531614	0.170477	0.9968	0.95155	0.467792	1.0801	0.9452
Putative_2-Hydroxypalmitic acid	523924	0.180228	1.0701	0.95235	0.573994	0.9724	0.9302
VLCDCA_34	537603	-0.108413	0.6671	0.95351	-0.628086	0.6226	0.9102
Polar Molecule_STEARATE [M-H]	530351	-0.131937	0.8233	0.95358	-0.184564	0.6500	0.9706
EIC_338	297072	0.113806	0.7202	0.95406	1.610876	0.6865	0.6192
FFA_Dihomo-g-linolenic† [M-H]	529407	-0.106491	0.6868	0.95516	0.962940	0.7684	0.8220
FAHFA_43	529622	-0.124961	0.8151	0.95521	0.119536	0.9618	0.9856
Putative_3-Hydroxystanozolol glucuronide	281952	-0.145252	0.9783	0.95647	0.527072	0.8905	0.9302
EIC_91	329577	-0.091299	0.6138	0.95647	-0.412003	0.5726	0.9121
Putative_6-((E)-2-((1R,2S,3R,5S)-3,5-Dihydroxy-2-((Z)-oct-2-enyl)cyclopentyl)vinyl)tetrahydro-2H-pyran-2-one	174904	0.109630	0.7548	0.95778	0.605097	0.6199	0.9102
EIC_257	249793	0.102920	0.7254	0.95922	-0.193862	0.7637	0.9706
EIC_79	252002	-0.092958	0.6805	0.95940	0.600207	0.5786	0.9102
Eicosanoid_13-oxoODE [M-H+Acetate]	402537	0.105007	0.7503	0.95940	-0.317118	0.6646	0.9302
FFA_Pentadecanoic Acid† [M-H]	527657	0.123996	0.9011	0.95940	-0.233492	0.8034	0.9706
Bile Acid_Ursodeoxycholic acid [M-H+Acetate]	244872	-0.127044	0.9627	0.96191	-1.237644	0.8985	0.8125
EIC_7	401671	0.137509	1.1205	0.96400	2.223390	0.8819	0.5786
Putative_Abietic acid	518727	-0.083061	0.6740	0.96400	0.550170	0.6014	0.9102
FFA_Oleic Acid† [M-H]	534665	0.110640	0.8824	0.96400	0.973819	0.9758	0.9102
FAHFA_69	541292	0.080520	0.6561	0.96400	-0.268754	0.6656	0.9564
Novel EIC_3	381111	0.089637	0.7551	0.96453	-0.211886	0.6362	0.9700
VLCDCA_44	544161	-0.094071	0.8430	0.96897	-0.558790	0.8192	0.9121
EIC_158	235415	-0.541684	5.0097	0.96916	0.103127	3.9539	0.9965
Docosanoid_10,11-DiHDPA [M-H+Acetate]	346852	-0.086127	0.8290	0.97129	-1.297210	0.6578	0.6316
Eicosanoid_12epi LTB4 [M-H+Acetate]	285289	-0.077873	0.7835	0.97266	-0.369649	0.7040	0.9302
EIC_15	412685	0.081394	0.8526	0.97407	-0.317795	0.9663	0.9700
EIC_122	361269	0.076709	0.8397	0.97608	-0.218988	0.7424	0.9706
EIC_356	208342	0.050466	0.6233	0.97945	-0.476125	0.6828	0.9121
FFA_Stearidonic Acid [M-H]	481336	-0.076914	0.9441	0.97945	0.923480	0.9432	0.9102
FFA_Oleic Acid† [M-H]	530347	0.060949	0.7424	0.97945	1.302365	0.6931	0.6481
FAHFA_56	530580	0.076557	0.9513	0.97945	-0.687046	0.8760	0.9121
Eicosanoid_9-oxoOTrE [M-H+Acetate]	368320	-0.071148	0.9510	0.98273	-1.322606	1.0294	0.8220
Eicosanoid_11b PGE2 [M-H]	104963	0.031946	0.6811	0.98776	0.256740	0.5253	0.9302
EIC_138	199063	0.031534	0.6556	0.98776	-0.091594	0.5411	0.9856
Eicosanoid_17,18-DiHETE [M-H+Acetate]	263807	0.043534	0.7137	0.98776	0.051403	0.6552	0.9918
EIC_111	443405	-0.057235	0.9143	0.98776	0.632999	0.7102	0.9102
EIC_183	455310	-0.028879	0.5923	0.98776	0.441383	0.5966	0.9121
FAHFA_12	523559	-0.055570	0.9205	0.98776	0.996249	0.8996	0.9102
Polar Molecule_OLEOYL-GLYCEROL [M-H+Acetate]	528185	0.052714	0.9461	0.98776	0.709578	1.0481	0.9121
FAHFA_39	528335	-0.040976	0.7079	0.98776	1.984616	0.8035	0.5786
VLCDCA_11	537154	-0.032321	0.6000	0.98776	0.065915	0.4870	0.9856
FFA_Docosadienoic Acid† [M-H]	539086	0.098845	1.7082	0.98776	-1.509360	1.5966	0.9102
VLCDCA_28	544581	-0.038241	0.7519	0.98776	-0.629284	0.5961	0.9102
Polar Molecule_LUMICHROME [M-H]	54898	-0.095037	1.6408	0.98776	-1.760168	0.7761	0.6316
Docosanoid_7(S),17(S)-hydroxy DPA [M-H+Acetate]	270778	-0.035835	0.8210	0.98856	-1.135667	0.8241	0.8125
Eicosanoid_13,14-dihydro-PGF1a [M-H]	195192	-0.031235	0.7806	0.98863	0.772458	0.8535	0.9102
EIC_189	381176	0.028316	0.7375	0.98863	0.293357	0.6845	0.9465
FFA_Linoleic Acid† [M-H]	532109	-0.030711	0.7839	0.98863	0.112305	0.8275	0.9856
Eicosanoid_15-epi-PGA1 [M-H+Acetate]	260175	0.030924	0.9603	0.98945	0.291347	0.7607	0.9623
EIC_147	293675	-0.045601	1.3953	0.98945	-0.230841	1.0430	0.9736
EIC_348	329017	0.021621	0.6131	0.98945	-1.054562	0.6326	0.6949
VLCDCA_8	534206	0.021700	0.7343	0.98972	-1.192848	0.6906	0.6949
Eicosanoid_15(S) HEPE [M-H+Acetate]	371287	-0.026589	1.0727	0.99125	0.173246	1.3916	0.9856
Putative_a-Hyodeoxycholic acid methyl ester	343493	-0.015563	0.8497	0.99229	-0.727644	0.6992	0.9102
Eicosanoid_19(R)-HETE [M-H]	362815	-0.017008	0.8069	0.99229	-0.049420	0.7353	0.9948
FFA_Heptadecanoic Acid† [M-H]	532380	0.013708	0.6885	0.99229	0.234667	0.7967	0.9706
EIC_72	439727	0.012062	0.8109	0.99323	-0.823485	0.8413	0.9102
Eicosanoid_5(S) HETrE [M-H]	501853	-0.007340	0.5366	0.99323	1.236309	0.5586	0.6316
EIC_143	315302	-0.004928	0.6556	0.99539	0.124989	0.5777	0.9736
Polar Molecule_MYRISTATE [M-H]	519152	-0.006099	0.6872	0.99539	-0.377860	0.6636	0.9302

## Sheet: Supplementary Table 7.
Supplementary Table 7. The effect of intensive fat mass loss and fat mass regain on LC-MS-Metabolome in the diet group compared to control group of physique study participants, when adjusted with physical activity
Annotation and adduct information		PRE-MID			PRE-POST
Metabolite ID	Matching ID	Estimate	Standard error	FDR	Estimate	Standard error	FDR
Polar Molecule_TRICOSANOATE [M-H]	539374	5.025069	1.0233	0.0006528	-1.1913904	0.6238	0.6637
Eicosanoid_13S-HpOTrE(gamma) [M-H]	387101	4.421908	1.0373	0.0048358	-2.0150637	1.0957	0.6637
FFA_Tricosenoic Acid [M-H]	539371	4.344345	1.0149	0.0048358	-0.8940805	0.6440	0.7604
EIC_260	267578	2.272401	0.5599	0.0082208	0.0455553	0.5042	0.9826
EIC_64	296371	6.684054	1.6610	0.0082208	0.7356781	0.7640	0.8126
Polar Molecule_CORTISONE [M-H+Acetate]	106542	2.467454	0.6448	0.0133261	0.9280465	0.6767	0.7604
Novel EIC_5	373373	2.386648	0.6202	0.0133261	0.5185978	0.7185	0.8414
EIC_121	285160	3.829577	1.0322	0.0149010	-0.0553459	0.6451	0.9826
Eicosanoid_11,12-diHETrE [M-H+Acetate]	350152	5.595060	1.5033	0.0149010	1.3111924	0.9832	0.7604
Novel EIC_9	424299	4.815591	1.2899	0.0149010	-1.0627788	0.7223	0.7604
EIC_125	185482	7.768844	2.1692	0.0199577	-0.7280448	0.8947	0.8365
EIC_71	312209	3.474026	1.0051	0.0199577	1.0837738	0.6253	0.6637
Eicosanoid_11,12-diHETrE [M-H]	355943	2.496624	0.7145	0.0199577	0.5006602	0.5679	0.8298
EIC_345	397350	3.146077	0.9105	0.0199577	-0.6883145	0.9231	0.8414
EIC_17	404135	3.216514	0.9077	0.0199577	0.7811635	0.7285	0.8094
FFA_Behenic Acid† [M-H]	540593	1.954172	0.5576	0.0199577	-0.4741974	0.5070	0.8268
FFA_Nervonic Acid† [M-H]	541517	2.120148	0.5997	0.0199577	1.6346520	0.6379	0.5100
FFA_Behenic Acid† [M-H]	542037	3.333163	0.9510	0.0199577	0.3310247	0.6858	0.8919
FFA_Tricosenoic Acid [M-H]	542617	3.955534	1.1269	0.0199577	0.0057364	0.6809	0.9994
FFA_Lignoceric Acid† [M-H]	544841	2.847582	0.8248	0.0199577	-0.6635983	0.7460	0.8298
EIC_16	399201	2.389987	0.6989	0.0213991	0.4163823	0.6775	0.8648
Polar Molecule_OLEOYL-GLYCEROL [M-H]	523301	4.992526	1.4650	0.0213991	-1.2403170	1.2913	0.8126
EIC_233	167632	3.062698	0.9082	0.0233122	1.1827447	0.8527	0.7604
Bile Acid_Taurocholic Acid [M-H]	121166	6.630718	2.0230	0.0245315	1.0699438	1.4963	0.8414
Eicosanoid_14,15-DiHETE [M-H+Acetate]	298878	3.270508	0.9963	0.0245315	0.3849032	0.8144	0.8919
Eicosanoid_9(S) HOTrE [M-H]	353929	2.238702	0.6855	0.0245315	-0.0390428	0.5096	0.9826
EIC_69	413523	3.930233	1.1967	0.0245315	0.0775446	0.7974	0.9826
EIC_69	419015	6.191141	1.8671	0.0245315	0.8910131	1.4990	0.8656
Novel EIC_28	457606	11.753568	3.5892	0.0245315	-0.4930288	0.7015	0.8439
Putative_1-Oleoyl-sn-glycero-3-phosphoethanolamine	463104	3.181274	0.9539	0.0245315	-0.7974514	0.6530	0.7913
Eicosanoid_15 oxoEDE [M-H+Acetate]	467225	3.451300	1.0382	0.0245315	1.0748529	0.7870	0.7604
Putative_N-Oleoyl-L-serine	524040	3.122626	0.9471	0.0245315	-1.1023214	0.6343	0.6637
FFA_Tricosanoic Acid† [M-H]	544047	2.077918	0.6430	0.0268282	0.0039781	0.5029	0.9994
Bile Acid_b-Muricholic Acid [M-H]	235527	12.431776	3.9210	0.0317964	-7.2331870	3.8826	0.6637
EIC_69	416464	4.812733	1.5203	0.0317964	0.7635037	1.2507	0.8656
Bile Acid_b-Muricholic Acid [M-H+Acetate]	235588	12.170070	3.8654	0.0327810	-6.6792244	3.8327	0.6637
FFA_Lignoceric Acid† [M-H+Acetate]	546323	4.029341	1.2924	0.0354222	0.6103760	0.6296	0.8126
Polar Molecule_CORTISONE [M-H+Acetate]	100714	2.483042	0.8006	0.0359275	1.0397679	0.6968	0.7604
EIC_62	263579	4.502636	1.4570	0.0359275	-0.0850174	0.7260	0.9826
Polar Molecule_GAMMA-LINOLENATE [M-H]	516521	-1.842840	0.5959	0.0359275	0.3934734	0.6329	0.8592
EIC_271	281689	3.803647	1.2430	0.0385545	0.9936804	0.7209	0.7604
Eicosanoid_5,6-EET [M-H]	467558	-1.819745	0.5957	0.0385545	-0.0778307	0.7213	0.9826
EIC_184	334912	2.063498	0.6794	0.0392700	0.3433269	0.6012	0.8707
FFA_Tricosanoic Acid† [M-H+Acetate]	542670	1.802021	0.5937	0.0392700	-0.4084987	0.5343	0.8412
EIC_229	193228	1.669486	0.5517	0.0395737	0.5352925	0.6643	0.8365
FFA_Tricosanoic Acid† [M-H]	542623	1.788014	0.5924	0.0397438	-0.7717175	0.5687	0.7604
EIC_20	393655	2.841873	0.9450	0.0403444	-0.4698314	0.9797	0.8919
EIC_125	198399	4.942835	1.6610	0.0428753	0.4658626	1.7335	0.9426
EIC_52	240462	3.121363	1.0480	0.0428753	-0.4864320	0.4956	0.8126
EIC_267	224977	-2.317018	0.7870	0.0456692	0.9041127	1.1576	0.8365
Eicosanoid_tetranor 12(R) HETE [M-H+Acetate]	320002	2.303542	0.7811	0.0456692	1.2342107	0.8833	0.7604
EIC_62	253339	7.542328	2.5867	0.0483448	0.1584486	0.7747	0.9599
EIC_15	406050	2.174628	0.7462	0.0483448	0.5833399	0.7380	0.8365
Eicosanoid_13,14-dihydro-15-keto-PGA2 [M-H+Acetate]	253519	5.795639	1.9992	0.0498513	0.0456564	0.6767	0.9826
EIC_71	298732	2.877593	1.0004	0.0525853	0.5115062	0.8761	0.8665
Bile Acid_Chenodeoxycholic acid [M-H]	335887	10.980878	3.8441	0.0530857	-6.4336771	3.8472	0.6688
Novel EIC_9	422540	3.259361	1.1391	0.0530857	-1.3274369	0.7794	0.6688
EIC_73	294423	3.932166	1.3854	0.0552083	-0.0673026	0.9280	0.9826
EIC_63	399217	3.035630	1.0733	0.0552083	-0.3298912	0.6073	0.8717
EIC_23	437680	2.214213	0.7830	0.0552083	-0.1821066	0.6862	0.9426
EIC_137	217947	2.448472	0.8797	0.0560972	-0.6262610	0.8119	0.8379
EIC_14	394634	5.956636	2.1286	0.0560972	0.7308411	0.8168	0.8298
Novel EIC_8	433376	3.932604	1.4125	0.0560972	-0.1780459	0.7544	0.9521
Polar Molecule_OLEOYL-GLYCEROL [M-H]	522767	3.840481	1.3668	0.0560972	-0.1393828	0.9847	0.9795
FFA_Behenic Acid† [M-H+Acetate]	542079	3.125586	1.1212	0.0560972	-0.3480186	0.7046	0.8865
FFA_Lignoceric Acid† [M-H]	546284	4.262048	1.5227	0.0560972	0.5977690	0.7330	0.8365
EIC_22	406441	1.669319	0.6012	0.0564372	0.2651197	0.5969	0.8950
Bile Acid_Chenodeoxycholic acid [M-H+Acetate]	335959	10.409276	3.7609	0.0571641	-6.1749472	3.7179	0.6688
Putative_N-Oleoyl-L-serine	522459	2.562665	0.9319	0.0595136	-1.7349573	0.7725	0.5924
EIC_306	316868	2.036232	0.7481	0.0639266	-0.0569404	0.6067	0.9826
Novel EIC_10	347387	1.887450	0.7002	0.0680024	0.1356807	0.7119	0.9611
Eicosanoid_5,6-diHETrE [M-H]	390693	-3.307755	1.2285	0.0680024	-1.8692120	1.0448	0.6637
Eicosanoid_11-dehydro-2,3-dinor-TXB2 [M-H+Acetate]	132844	3.428850	1.2791	0.0694889	-0.6973439	0.5242	0.7604
Eicosanoid_13S-HpOTrE [M-H]	370062	3.345497	1.2594	0.0737293	-1.3882671	0.6104	0.5856
EIC_47	197702	3.188023	1.2316	0.0888740	0.6436469	0.9410	0.8504
EIC_121	298758	2.516877	0.9743	0.0890761	-2.6598603	1.3096	0.6637
EIC_45	226969	1.414548	0.5513	0.0913157	0.7305522	0.6862	0.8094
EIC_29	356636	1.890774	0.7356	0.0913157	0.5453303	0.6361	0.8298
Bile Acid_Deoxycholic Acid [M-H+Acetate]	353332	5.910658	2.3123	0.0928077	-2.7304448	1.5371	0.6637
Bile Acid_Deoxycholic Acid [M-H]	353270	5.523932	2.1861	0.0997163	-2.5787443	1.4613	0.6637
EIC_63	392256	3.836033	1.5348	0.1062611	1.0731723	1.1554	0.8271
Eicosanoid_5,6-EET [M-H+Acetate]	470913	2.036818	0.8161	0.1062611	-0.2583571	0.7856	0.9426
Putative_PGPC	448001	7.483653	3.0050	0.1066736	0.7802582	1.0553	0.8414
Polar Molecule_HEPTADECANOATE [M-H]	529375	-1.509975	0.6073	0.1067064	0.0916957	0.5447	0.9666
Bile Acid_b-Muricholic Acid [M-H]	237948	21.296365	8.6028	0.1087024	-8.7961975	6.9476	0.7776
EIC_176	379289	2.580181	1.0517	0.1135387	0.8034893	0.5107	0.7296
Eicosanoid_11(12)-EpETE [M-H]	421508	-1.799089	0.7338	0.1135387	-0.9860447	1.0623	0.8271
Eicosanoid_12S-HpEPE [M-H]	392272	2.554803	1.0475	0.1164168	0.8376117	0.9233	0.8281
FAHFA_76	545467	-1.896813	0.7845	0.1206724	-1.2663922	0.8158	0.7371
FFA_Nervonic Acid† [M-H]	545847	1.879771	0.7763	0.1206724	0.0617911	0.7887	0.9826
FFA_Palmitoleic Acid† [M-H]	526135	-1.227423	0.5100	0.1230523	0.3162372	0.5191	0.8656
Eicosanoid_8(S) HETrE [M-H+Acetate]	445744	2.439111	1.0247	0.1309428	-1.0297828	1.2936	0.8365
FFA_Tricosenoic Acid [M-H]	541791	2.058947	0.8715	0.1359859	-1.6029658	0.7979	0.6637
EIC_51	336280	2.364585	1.0048	0.1379360	-0.5006462	0.8496	0.8656
Eicosanoid_2,3-dinor-PGE1 [M-H+Acetate]	139967	-0.905315	0.3872	0.1386278	-1.3080132	0.6073	0.6245
EIC_51	330923	2.352505	1.0066	0.1386278	0.3485587	0.8626	0.9119
Eicosanoid_5,6-diHETrE [M-H]	383602	1.127865	0.4840	0.1386278	0.6442226	0.7234	0.8298
EIC_15	410919	-1.667825	0.7127	0.1386278	-1.0785847	1.0443	0.8101
FFA_Heptadecaenoic Acid† [M-H]	529369	-1.534014	0.6587	0.1386278	0.0301267	0.5910	0.9826
VLCDCA_1	531095	-1.442511	0.6189	0.1386278	-0.3980214	1.2155	0.9426
EIC_125	190567	2.328263	1.0066	0.1419149	0.1186765	1.4976	0.9826
Putative_1-Stearoyl-2-hydroxy-sn-glycero-3-phosphoethanolamine	521802	1.265792	0.5473	0.1419149	0.4682500	0.5614	0.8313
EIC_158	226291	1.566454	0.6784	0.1420043	-0.8670150	0.9389	0.8271
EIC_62	256944	3.778571	1.6419	0.1436115	-0.0487179	0.9312	0.9826
Eicosanoid_13-HODE [M-H+Acetate]	397750	3.020128	1.3291	0.1535462	-0.1050438	0.8539	0.9826
EIC_10	432853	-1.185435	0.5234	0.1552301	0.6118902	0.5389	0.8094
Putative_Bilirubin	525957	-2.190180	0.9734	0.1569110	-1.2362105	1.1357	0.8094
FFA_Heptadecaenoic Acid† [M-H+Acetate]	531646	7.417877	3.2937	0.1569110	0.5395357	1.2158	0.8950
VLCDCA_15	533187	-1.336916	0.5924	0.1569110	-1.1508112	0.8120	0.7604
Bile Acid_Glycochenodeoxycholic Acid [M-H]	255997	4.579603	2.0474	0.1609721	-1.5500301	0.9239	0.6688
FFA_Palmitoleic Acid† [M-H]	531843	-1.416962	0.6348	0.1615449	0.6151127	0.5420	0.8094
Eicosanoid_12-HETE [M-H+Acetate]	425444	1.544859	0.6961	0.1639853	0.4484690	0.9755	0.8919
FFA_Nervonic Acid† [M-H]	544451	1.958959	0.8824	0.1639853	-0.9220425	0.7491	0.7913
Eicosanoid_13,14-dihydro-PGE1 [M-H]	185541	1.670847	0.7563	0.1666463	0.0256676	0.4673	0.9826
FFA_Palmitoleic Acid† [M-H+Acetate]	526018	-1.123183	0.5090	0.1666463	0.3971492	0.5359	0.8414
Eicosanoid_8,9-diHETrE [M-H+Acetate]	365688	1.549832	0.7039	0.1672965	1.0216651	0.7229	0.7604
FAHFA_71	537708	1.953993	0.8973	0.1763776	0.7063309	0.8197	0.8298
EIC_205	208847	1.224326	0.5660	0.1799966	0.1354780	0.5723	0.9521
Polar Molecule_N-ACETYLTRYPTOPHAN [M-H+Acetate]	49032	-2.310518	1.0677	0.1799966	-0.3324384	1.0113	0.9426
EIC_65	333119	4.497995	2.0985	0.1816166	-0.5913526	0.9867	0.8656
Bile Acid_Deoxycholic Acid [M-H+Acetate]	346895	10.928926	5.0926	0.1816166	-4.3709873	1.8495	0.5426
EIC_100	410589	-1.508899	0.7034	0.1816166	-0.4040010	0.8736	0.8919
EIC_101	433368	1.319733	0.6154	0.1816166	0.2852947	0.6267	0.8919
VLCDCA_1	532475	-1.474476	0.6865	0.1816166	-0.6916859	0.6272	0.8094
EIC_33	446442	1.618980	0.7572	0.1825963	-1.9427163	1.6849	0.8094
FFA_Palmitoleic Acid† [M-H]	529701	-1.176730	0.5526	0.1851065	0.9877200	0.5590	0.6637
EIC_303	333176	1.588365	0.7492	0.1880558	0.1002026	0.5680	0.9660
FAHFA_47	529594	-1.511375	0.7144	0.1887495	0.7043212	0.8085	0.8298
Eicosanoid_5S-HpEPE [M-H]	400564	2.183479	1.0345	0.1895599	-0.6065993	0.6273	0.8126
EIC_80	365075	1.342610	0.6389	0.1910284	0.9546054	0.7039	0.7604
Eicosanoid_13(S) HOTrE [M-H+Acetate]	365619	1.382038	0.6577	0.1910284	0.2894341	0.9074	0.9426
Putative_1-Pentadecanoyl-sn-glycero-3-phosphocholine	394443	1.170938	0.5600	0.1945500	-0.6099505	0.6043	0.8101
Putative_PGPC	447166	7.232384	3.4789	0.1974632	0.8256931	0.7255	0.8094
Polar Molecule_ERUCATE [M-H+Acetate]	533386	2.389623	1.1478	0.1974632	-0.7298247	0.5948	0.7913
Eicosanoid_5,6-diHETrE [M-H]	386644	-1.742716	0.8457	0.2049866	-1.1682099	1.1606	0.8101
EIC_77	435704	1.502556	0.7314	0.2066386	-0.0321020	0.9409	0.9876
EIC_312	348127	1.224694	0.5971	0.2068296	0.2537869	0.6592	0.9205
Eicosanoid_Adrenic Acid [M-H]	530967	-1.040609	0.5084	0.2074394	0.9670992	0.6984	0.7604
Eicosanoid_11-dehydro-2,3-dinor-TXB2 [M-H+Acetate]	136286	1.559185	0.7713	0.2185043	-0.6885133	0.6318	0.8094
EIC_310	316877	1.401498	0.6961	0.2185043	-0.0365187	0.6715	0.9826
VLCDCA_34	544601	-0.679137	0.3367	0.2185043	-1.3758005	0.5269	0.4992
Putative_1a-Methyl-5a-androstan-3a,17b-diol glucuronide	96184	1.306232	0.6485	0.2185043	0.0466247	1.1406	0.9852
Putative_Abietic acid	514832	-3.721116	1.8520	0.2191773	-0.5518802	1.0603	0.8776
EIC_205	212224	1.399240	0.7043	0.2280462	0.1995118	0.4552	0.8953
FAHFA_69	545400	2.025282	1.0193	0.2280462	0.0353065	1.0884	0.9876
EIC_124	240491	2.365510	1.1947	0.2301601	0.3739918	1.2916	0.9426
EIC_135	321522	2.366380	1.1979	0.2311343	0.4871906	0.9364	0.8776
FFA_Eicosenoic Acid [M-H]	533336	-1.548574	0.7878	0.2348983	0.6374441	0.9065	0.8439
Eicosanoid_PGG2 [M-H+Acetate]	192014	-2.029914	1.0342	0.2349693	-1.3221869	0.8970	0.7604
Bile Acid_Tauroursodeoxycholic acid [M-H]	164435	2.967457	1.5214	0.2373559	2.1692249	1.7058	0.7776
Putative_Androsterone glucuronide	170446	2.844041	1.4578	0.2373559	-1.2399289	0.5478	0.5856
Bile Acid_Ursodeoxycholic acid [M-H+Acetate]	237318	3.057456	1.5679	0.2373559	-0.5683206	0.7158	0.8365
Putative_Levofloxacin	36118	1.175614	0.6055	0.2405882	0.7428579	0.7707	0.8126
Eicosanoid_PGE3 [M-H+Acetate]	148936	1.041456	0.5392	0.2436018	-0.4440264	0.4817	0.8271
Eicosanoid_tetranor 12(R) HETE [M-H]	322224	1.375865	0.7127	0.2436018	-0.1914735	0.7984	0.9521
EIC_62	269687	1.876817	0.9762	0.2465940	0.3695266	0.5724	0.8552
EIC_318	136905	0.779770	0.4112	0.2523556	-0.3033657	0.4699	0.8552
Putative_Androsterone glucuronide	179343	3.436888	1.8092	0.2523556	-0.5799157	0.7241	0.8365
Eicosanoid_13,14-dihydro-PGF1a [M-H]	190593	-2.464118	1.2928	0.2523556	0.0728260	0.8319	0.9826
Eicosanoid_8,9-diHETrE [M-H]	357813	1.159860	0.6101	0.2523556	1.0431404	0.5885	0.6637
FFA_Docosaenoic Acid† [M-H]	537429	1.574578	0.8294	0.2523556	0.3369206	0.7341	0.8919
EIC_9	408763	-1.493999	0.7936	0.2588166	-0.3842814	0.9457	0.9117
EIC_322	247451	1.048050	0.5576	0.2589430	0.5576921	0.5584	0.8126
Eicosanoid_13(S) HOTrE(y) [M-H]	378072	2.034309	1.0845	0.2597392	0.5588186	0.7184	0.8365
VLCDCA_28	542127	1.259543	0.6748	0.2635515	-0.3247867	0.6677	0.8909
Bile Acid_Ursodeoxycholic acid [M-H]	237244	3.023940	1.6282	0.2660458	-0.3717562	0.8083	0.8919
FAHFA_22	526407	-0.923094	0.4969	0.2660458	0.6311786	0.6920	0.8271
FAHFA_15	527360	-1.625740	0.8770	0.2666311	0.1495047	0.7674	0.9611
EIC_138	199063	1.006743	0.5444	0.2677737	-0.3512827	0.5116	0.8504
Docosanoid_7-epi-Maresin 1 [M-H+Acetate]	254854	-6.197840	3.3801	0.2756491	-3.4889760	1.8743	0.6637
Putative_5a-Androstan-3a,17b-diol-17b-glucuronide	157904	-1.305065	0.7128	0.2757341	-0.9935544	0.6967	0.7604
EIC_322	266179	1.131455	0.6195	0.2769461	-1.0249893	0.5376	0.6637
EIC_65	321476	1.682569	0.9259	0.2780653	-1.7020075	0.7753	0.6219
EIC_1	325888	1.074339	0.5913	0.2780653	-0.3392624	0.7934	0.9011
VLCDCA_14	541584	2.073207	1.1383	0.2780653	0.3186416	1.0652	0.9426
Eicosanoid_13(S) HOTrE(y) [M-H]	373917	2.013709	1.1118	0.2800286	-0.6806291	0.8546	0.8365
Eicosanoid_15t-Protectin D1 [M-H+Acetate]	275324	-1.173597	0.6505	0.2811885	-0.8112527	0.6872	0.8060
Putative_2-Hydroxypalmitic acid	521349	-0.934212	0.5185	0.2811885	1.3049065	0.6001	0.6219
FFA_Eicosenoic Acid [M-H]	531994	-1.255399	0.6959	0.2811885	0.3517235	0.9266	0.9206
Eicosanoid_13,14-dihydro-PGE1 [M-H]	198449	1.717939	0.9549	0.2813520	1.9170020	0.6105	0.4598
Eicosanoid_13,14-dihydro-PGE1 [M-H]	189965	-1.837004	1.0238	0.2828450	-1.6589079	0.8679	0.6637
Putative_Chenodeoxycholic acid 24-acyl-b-D-glucuronide	236149	2.643670	1.4807	0.2868278	0.7042426	0.9761	0.8414
Eicosanoid_15 oxoEDE [M-H]	479072	-1.004940	0.5644	0.2882935	-0.2359895	0.6420	0.9278
EIC_329	263763	0.965524	0.5443	0.2892892	0.6204259	0.6343	0.8126
EIC_110	433852	1.293203	0.7286	0.2892892	0.9912937	0.8073	0.7913
FFA_a-linolenic Acid† [M-H]	517566	-2.167021	1.2231	0.2892892	-0.5268929	0.9453	0.8717
Polar Molecule_LUMICHROME [M-H]	51894	1.604488	0.9083	0.2910674	-0.7021706	0.7964	0.8298
EIC_80	358635	-3.263696	1.8567	0.2950447	-0.9942900	0.7010	0.7604
EIC_68	383553	1.782816	1.0159	0.2953093	-0.4896593	0.6805	0.8414
Eicosanoid_tetranor-PGFM [M-H]	31459	-1.704270	0.9797	0.3008662	-1.0210032	1.1118	0.8271
Eicosanoid_15S-HpETE [M-H]	413128	1.006126	0.5785	0.3008662	-0.4735574	0.6595	0.8414
Endocannabinoid_Oleoyl Ethanolamide [M-H+Acetate]	520172	-1.422133	0.8159	0.3008662	-2.6014167	1.8501	0.7604
EIC_86	450186	-0.963651	0.5569	0.3049744	-0.8462428	0.6281	0.7604
Eicosanoid_PGG2 [M-H+Acetate]	184987	-1.941179	1.1283	0.3099875	-0.2064161	1.0383	0.9611
EIC_225	261389	-0.964600	0.5675	0.3223072	-0.0503260	0.6392	0.9826
Eicosanoid_13,14-dihydro-15-keto-PGE1 [M-H]	215016	-3.376863	2.0149	0.3304328	-0.9789182	1.4078	0.8496
EIC_137	228394	0.938710	0.5599	0.3304328	0.0275044	0.6088	0.9845
EIC_156	264493	0.905719	0.5397	0.3304328	0.4715797	0.6997	0.8519
Putative_2-Hydroxypalmitic acid	525710	-0.772630	0.4591	0.3304328	0.3379116	0.6652	0.8776
FFA_a-linolenic Acid† [M-H]	527674	1.290809	0.7702	0.3304328	0.2091085	0.7422	0.9426
EIC_176	370103	1.300927	0.7795	0.3336790	0.8682477	0.6671	0.7698
Putative_Glycocholic acid	179340	2.961190	1.7779	0.3343692	-1.1634620	0.7883	0.7604
EIC_166	350670	2.064770	1.2432	0.3360562	-0.2121424	0.7821	0.9426
Polar Molecule_CORTISONE [M-H]	112369	-1.060874	0.6445	0.3399456	0.0294340	0.5239	0.9826
EIC_135	324550	1.766788	1.0707	0.3399456	0.4498883	0.8843	0.8776
EIC_303	328235	1.203884	0.7306	0.3399456	-0.1013598	0.9857	0.9826
FFA_Heptadecaenoic Acid† [M-H+Acetate]	529424	-0.885025	0.5376	0.3399456	-0.3072037	0.6385	0.8919
EIC_26	441431	1.378226	0.8443	0.3480173	0.3859348	0.7495	0.8776
EIC_100	414042	1.322208	0.8140	0.3520886	1.0911913	0.6692	0.6985
FFA_Linoleic Acid† [M-H]	526174	-0.968784	0.5981	0.3536731	0.8493750	0.6864	0.7913
Polar Molecule_N-ACETYLTRYPTOPHAN [M-H]	45049	1.079529	0.6676	0.3540580	-0.9391184	0.6212	0.7604
Putative_1,3,5(10)-Estratrien-3,17b-diol 17-glucosiduronate	271516	-1.282155	0.7967	0.3580487	-0.6889294	0.7987	0.8298
EIC_178	254050	-5.745115	3.5954	0.3646885	-4.4362683	2.0847	0.6479
EIC_343	395749	1.437394	0.9029	0.3674263	-2.1125355	1.2528	0.6688
Novel EIC_13	426801	1.357816	0.8543	0.3675636	1.3839702	0.8535	0.6985
Putative_2a-Methyl-5a-androstan-3a-ol-17-one glucuronide	98088	1.035911	0.6542	0.3703603	-0.0548383	0.9370	0.9826
EIC_169	349398	1.112238	0.7044	0.3703906	1.0797235	0.5654	0.6637
EIC_31	407392	1.128085	0.7135	0.3703906	1.8382664	0.8038	0.5856
EIC_124	238208	1.286779	0.8203	0.3747842	-0.3984572	0.7516	0.8776
Putative_11a-Hydroxyprogesterone b-D-glucuronide	269360	1.182161	0.7537	0.3747842	-1.2152281	1.2034	0.8101
Putative_Levofloxacin	34432	-0.720759	0.4607	0.3762142	-0.5864782	0.5452	0.8094
Eicosanoid_LTF4 [M-H]	266556	-1.392622	0.8969	0.3811954	0.6460290	0.5809	0.8094
Eicosanoid_11t LTE4 [M-H+Acetate]	275412	1.047575	0.6769	0.3811954	1.2367154	0.6078	0.6637
Eicosanoid_7,17 dhDPA [M-H+Acetate]	289392	0.857094	0.5537	0.3811954	0.5636254	0.6074	0.8271
EIC_185	397724	-1.307950	0.8458	0.3811954	-0.5247679	0.8435	0.8592
FFA_Eicosadienoic Acid† [M-H]	531992	-0.837960	0.5436	0.3811954	1.0375506	0.5900	0.6637
VLCDCA_7	539773	2.111629	1.3677	0.3811954	-1.2216158	0.6526	0.6637
VLCDCA_14	540389	2.230336	1.4413	0.3811954	-0.4978625	1.2991	0.9205
Eicosanoid_PGF1a [M-H]	171489	-0.946873	0.6199	0.3858055	0.3230357	0.6410	0.8792
FAHFA_48	528338	1.090705	0.7132	0.3858055	2.1010953	0.8355	0.5100
EIC_139	211121	1.577202	1.0492	0.3969688	-0.8948375	0.9769	0.8271
EIC_194	407696	1.256102	0.8361	0.3969688	1.1124169	0.7937	0.7604
Putative_2-Hydroxypalmitic acid	518068	-1.029909	0.6852	0.3969688	-0.5916521	0.7406	0.8365
FFA_Arachidic Acid† [M-H]	536380	1.822505	1.2069	0.3969688	-0.7700662	0.9295	0.8313
Polar Molecule_allo-Tetrahydrocortisol [M-H+Acetate]	97322	-1.477681	0.9837	0.3969688	-0.1833208	0.6225	0.9426
Polar Molecule_CORTICOSTERONE [M-H+Acetate]	140738	-0.738135	0.4925	0.3971040	-0.7309337	0.5490	0.7604
FFA_Arachidic Acid† [M-H+Acetate]	534912	1.375366	0.9183	0.3971040	0.0987629	0.7914	0.9826
Docosanoid_osbond acid, all-cis-4,7,10,13,16-DPA [M-H]	528114	-0.722402	0.4831	0.3972326	1.8496613	0.6589	0.4896
FFA_Behenic Acid† [M-H]	539090	1.313784	0.8806	0.3982548	0.6265538	1.2106	0.8776
Bile Acid_Glycochenodeoxycholic Acid [M-H]	237311	1.482354	0.9959	0.3992949	-0.8205322	0.6141	0.7604
Polar Molecule_CORTISONE [M-H+Acetate]	112455	-1.019614	0.6909	0.4048168	0.0706405	0.6079	0.9826
FAHFA_21	526086	-0.881428	0.5964	0.4048168	0.3410010	0.5276	0.8552
EIC_263	204232	0.718573	0.4888	0.4058534	-0.5957448	0.6131	0.8126
Eicosanoid_12S-HpETE [M-H]	430722	-1.147461	0.7808	0.4058534	-1.9293320	1.1185	0.6679
Putative_Chenodeoxycholic acid 24-acyl-b-D-glucuronide	232936	2.334187	1.5928	0.4074397	-0.7399906	0.7357	0.8101
FFA_Nervonic Acid† [M-H]	539105	1.699022	1.1624	0.4087463	-0.6207960	0.6253	0.8126
Polar Molecule_GLYCOCHOLATE [M-H]	172623	2.994479	2.0720	0.4151930	-1.5334141	0.8117	0.6637
EIC_95	408174	-0.943812	0.6530	0.4151930	-0.0610060	0.7440	0.9826
VLCDCA_26	535393	-1.006390	0.6950	0.4151930	-1.6058895	0.6718	0.5426
FAHFA_59	532202	-1.075842	0.7472	0.4177174	-0.2429331	0.8941	0.9426
Putative_Dodecylbenzenesulfonic acid	399899	1.417070	0.9873	0.4196991	-0.3431418	1.1471	0.9426
Eicosanoid_12-oxoETE [M-H]	423400	-0.978472	0.6828	0.4198792	0.2046084	0.6954	0.9426
Endocannabinoid_Arachidonoyl Ethanolamide [M-H+Acetate]	479677	-0.728786	0.5119	0.4256600	0.9171579	0.7069	0.7698
Putative_1-Stearoyl-2-hydroxy-sn-glycero-3-phosphoethanolamine	525188	0.866332	0.6099	0.4266737	0.7003492	0.7889	0.8298
FFA_Dihomo-g-linolenic† [M-H]	529407	-0.680389	0.4823	0.4329052	1.2555082	0.7477	0.6688
Putative_5a-Androstan-3a,17b-diol-17b-glucuronide	150234	-1.090342	0.7772	0.4375837	-1.0335125	0.8077	0.7757
Putative_Monolinolenin (9c,12c,15c)	343482	0.921679	0.6586	0.4378523	0.9157718	0.7138	0.7757
Putative_N-oleoyl taurine	497820	-0.741292	0.5301	0.4378523	-0.2112220	0.6435	0.9426
Novel EIC_24	466757	1.287499	0.9228	0.4387723	0.5730376	0.6894	0.8313
EIC_102	446037	-0.927130	0.6666	0.4406648	0.0459995	0.6250	0.9826
Putative_3-Hydroxystanozolol glucuronide	281952	-1.327169	0.9562	0.4413928	0.8262521	0.8599	0.8126
Eicosanoid_5,6-EET [M-H]	469222	-0.867272	0.6258	0.4414548	0.3751776	0.5498	0.8504
Docosanoid_Resolvin E1 [M-H+Acetate]	110221	0.777134	0.5640	0.4420188	0.3632378	0.6973	0.8776
Putative_Androsterone glucuronide	172624	3.229803	2.3391	0.4420188	-1.6584579	0.9179	0.6637
Novel EIC_14	448206	1.452318	1.0503	0.4420188	0.9220409	0.8746	0.8098
EIC_150	301803	0.709946	0.5183	0.4433207	0.1736972	0.7763	0.9547
EIC_122	358178	1.282381	0.9355	0.4433207	-1.0263987	0.9229	0.8094
Putative_Bilirubin	528314	-0.854869	0.6232	0.4433207	0.4828760	0.7654	0.8592
EIC_250	199108	-0.816148	0.5972	0.4442713	0.4539274	0.5452	0.8313
FFA_Eicosenoic Acid [M-H+Acetate]	534432	0.866226	0.6393	0.4504674	0.0737779	0.7799	0.9826
FFA_Myristic Acid [M-H+Acetate]	522387	-1.075711	0.7959	0.4514161	0.4271207	0.5985	0.8414
VLCDCA_11	533173	-0.951730	0.7054	0.4514161	-0.1208900	0.8063	0.9758
Putative_Oxymorphone 3-b-D-glucuronide	90626	-2.063007	1.5305	0.4514161	1.2090149	1.1323	0.8094
Eicosanoid_15k PGF2a [M-H+Acetate]	109511	0.702572	0.5255	0.4584730	0.5638863	0.6771	0.8313
Eicosanoid_PGF1a [M-H]	164760	0.859106	0.6481	0.4584730	0.0033749	0.5468	0.9994
Polar Molecule_GLYCOCHOLATE [M-H]	170444	2.005840	1.5060	0.4584730	-1.0117381	0.5239	0.6637
EIC_157	292929	1.191182	0.8954	0.4584730	-0.3771586	0.8034	0.8919
EIC_181	341438	0.691613	0.5208	0.4584730	0.7906337	0.6775	0.8060
EIC_109	403246	-5.289223	3.9981	0.4584730	-0.7587169	4.3945	0.9660
EIC_110	437709	1.195561	0.9027	0.4584730	1.1846044	0.8484	0.7604
FFA_Adrenic Acid† [M-H]	528116	-0.709329	0.5344	0.4584730	1.8897389	0.6882	0.4896
Eicosanoid_Adrenic Acid [M-H]	532126	-0.939246	0.7105	0.4584730	0.6040902	0.6007	0.8101
EIC_188	171462	-0.760525	0.5774	0.4592006	-1.0839214	0.6995	0.7371
Eicosanoid_LTB4 ethanol amide [M-H+Acetate]	227844	1.209758	0.9175	0.4592006	1.9100381	0.9709	0.6637
Eicosanoid_PGE3 [M-H+Acetate]	145653	0.769276	0.5855	0.4597142	-0.1762095	0.6370	0.9426
EIC_41	183510	1.147857	0.8744	0.4597142	0.1583366	0.7758	0.9599
Eicosanoid_tetranor 12(R) HETE [M-H]	331464	0.945120	0.7223	0.4617253	0.0056095	0.9442	0.9994
Polar Molecule_NERVONATE [M-H+Acetate]	536198	1.406008	1.0805	0.4631407	-2.0122758	0.6486	0.4598
Eicosanoid_PDX [M-H+Acetate]	282516	1.041406	0.8170	0.4835943	0.5325846	0.7881	0.8519
Bile Acid_Glycochenodeoxycholic Acid [M-H]	247605	1.348297	1.0650	0.4892446	-1.2218275	0.8586	0.7604
FAHFA_62	533738	-1.092535	0.8678	0.4937272	-1.4876261	1.1213	0.7604
VLCDCA_38	530224	-0.839957	0.6756	0.5048872	-0.7836636	0.6245	0.7887
FFA_Dihomo-g-linolenic† [M-H]	530664	-0.662691	0.5335	0.5048872	0.8569061	0.6610	0.7698
Putative_1a-Methyl-5a-androstan-3a,17b-diol glucuronide	100107	-0.857330	0.6928	0.5056602	-0.8565646	0.6399	0.7604
Polar Molecule_THYMIDINE-MONOPHOSPHATE [M-H+Acetate]	35550	-0.783739	0.6331	0.5056602	-1.8208382	0.9530	0.6637
VLCDCA_17	532515	-0.809151	0.6551	0.5060433	-0.8939877	0.8160	0.8094
Putative_4-[5-[[4-[5-[acetyl(hydroxy)amino]pentylamino]-4-oxobutanoyl]-hydroxyamino]pentylamino]-4-oxobutanoic acid	381293	-0.991877	0.8051	0.5065432	0.7984744	0.9061	0.8298
EIC_108	414045	0.806872	0.6556	0.5065432	0.8785379	0.6298	0.7604
FFA_Myristic Acid [M-H]	522346	-0.984174	0.8032	0.5082978	0.3498678	0.5930	0.8656
FFA_Pentadecanoic Acid† [M-H]	528566	-0.870183	0.7103	0.5082978	-0.4865880	0.7758	0.8592
Putative_7-Keto-3a,12-a-dihydroxycholanic acid	173610	0.912926	0.7531	0.5146128	1.3721647	0.8324	0.6797
EIC_1	310243	-1.114461	0.9168	0.5146128	-0.9986203	1.3361	0.8414
Novel EIC_1	405831	0.798736	0.6612	0.5166560	0.8712763	0.8154	0.8094
Polar Molecule_CORTISOL [M-H]	107951	1.286712	1.0723	0.5219845	0.3178053	0.7657	0.9074
Polar Molecule_CORTEXOLONE [M-H+Acetate]	159612	-0.610515	0.5140	0.5300842	-0.8455767	0.5088	0.6688
Eicosanoid_DHA [M-H]	523275	-0.966989	0.8146	0.5300842	-0.1945273	1.4398	0.9812
FFA_Arachidic Acid† [M-H]	541489	0.923805	0.7795	0.5301340	-0.3245077	0.8450	0.9205
Eicosanoid_11-dehydro-2,3-dinor-TXB2 [M-H+Acetate]	143490	-1.091085	0.9328	0.5355424	-0.1708394	0.7649	0.9547
Bile Acid_Glycoursodeoxycholic Acid [M-H]	169245	1.184594	1.0186	0.5355424	-0.1206688	0.6906	0.9660
Eicosanoid_8-iso-PGA2 [M-H+Acetate]	222096	0.910894	0.7823	0.5355424	0.1521214	0.6808	0.9547
Putative_Chenodeoxycholic acid 24-acyl-b-D-glucuronide	242299	1.951736	1.6769	0.5355424	-0.1478102	0.8621	0.9660
EIC_156	253384	0.773589	0.6648	0.5355424	1.4562164	1.3417	0.8094
FAHFA_14	522914	-1.003617	0.8634	0.5355424	-0.1392207	0.5976	0.9521
FFA_Pentadecanoic Acid† [M-H]	527657	0.966041	0.8294	0.5355424	-0.1665617	0.8059	0.9599
FFA_Pentadecanoic Acid† [M-H]	530326	-0.728664	0.6248	0.5355424	0.2924799	0.4944	0.8656
FFA_Docosatrienoic Acid† [M-H]	532415	-0.754503	0.6466	0.5355424	1.0688064	0.7240	0.7604
Docosanoid_7,8-DiHDPA [M-H]	364273	-0.694801	0.5996	0.5370994	0.5752438	0.5216	0.8094
Novel EIC_6	225577	-0.788880	0.6915	0.5508131	-0.7042484	0.8446	0.8313
Polar Molecule_GAMMA-LINOLENATE [M-H+Acetate]	518129	2.821640	2.4754	0.5508131	2.9239276	3.3560	0.8298
Polar Molecule_LUMICHROME [M-H]	54898	2.125325	1.8707	0.5525421	-1.4730132	0.7212	0.6637
EIC_83	344675	0.559726	0.4949	0.5555438	0.3152689	0.4730	0.8547
Eicosanoid_11-dehydro-2,3-dinor-TXB2 [M-H+Acetate]	128452	0.783506	0.6940	0.5557550	-0.5580700	0.8184	0.8504
Putative_Tauroursodeoxycholic acid	181279	-0.856972	0.7643	0.5610876	-0.8448184	1.5514	0.8717
EIC_232	222789	0.816650	0.7306	0.5618439	0.9531300	0.7908	0.7977
FAHFA_11	521853	-1.208797	1.0825	0.5618439	-0.8256768	1.3282	0.8592
EIC_250	195182	-0.640191	0.5749	0.5630095	0.1583532	0.5204	0.9426
Eicosanoid_17,18-DiHETE [M-H+Acetate]	263807	0.793805	0.7160	0.5658214	0.3740224	0.6704	0.8717
Bile Acid_Glycoursodeoxycholic Acid [M-H+Acetate]	181294	-0.870316	0.7897	0.5668243	-0.1554364	0.6214	0.9506
Bile Acid_Glycochenodeoxycholic Acid [M-H]	251495	3.317617	3.0082	0.5668243	-1.5545549	0.8711	0.6637
VLCDCA_23	535937	-0.737070	0.6687	0.5668243	-1.1925480	0.6837	0.6637
Docosanoid_7(S),17(S)-hydroxy DPA [M-H+Acetate]	263855	0.581178	0.5312	0.5709265	-0.8527924	0.7249	0.8060
EIC_88	373969	0.891390	0.8141	0.5709265	1.1741177	0.8505	0.7604
Putative_5a-Androstan-17b-ol-3-one glucosiduronate	201784	-1.444525	1.3278	0.5748758	-1.2238972	0.6973	0.6637
FFA_Myristic Acid [M-H]	527646	0.747405	0.6942	0.5836137	-0.5020848	0.7535	0.8547
EIC_135	316724	1.048840	0.9770	0.5847645	-0.2857071	1.2350	0.9521
FFA_Heptadecaenoic Acid† [M-H+Acetate]	532124	0.880452	0.8222	0.5856318	1.8574873	0.9251	0.6637
EIC_251	291460	2.943385	2.7876	0.5978263	2.8488236	3.6671	0.8365
EIC_14	387514	1.209242	1.1477	0.5982753	-1.7045322	1.0021	0.6688
Novel EIC_44	186232	-0.691248	0.6592	0.5997061	-1.0854743	0.8034	0.7604
Eicosanoid_11-HETE [M-H+Acetate]	423143	0.750047	0.7154	0.5997061	-0.1907031	0.7153	0.9426
Putative_6-((E)-2-((1R,2S,3R,5S)-3,5-Dihydroxy-2-((Z)-oct-2-enyl)cyclopentyl)vinyl)tetrahydro-2H-pyran-2-one	167035	-0.633148	0.6058	0.6005168	0.3172591	0.5522	0.8707
EIC_146	239745	0.538570	0.5183	0.6005168	-0.3475938	0.4734	0.8414
EIC_105	382736	0.674246	0.6465	0.6005168	0.5663377	0.5053	0.8094
Putative_Decylbenzenesulfonic acid	418979	1.424222	1.3713	0.6005168	-0.3736141	0.9201	0.9117
Polar Molecule_TRICOSANOATE [M-H]	540604	0.738350	0.7101	0.6005168	-0.8519055	0.5878	0.7604
EIC_106	378136	-1.132981	1.0980	0.6038188	-1.2493859	1.1992	0.8098
Endocannabinoid_N-oleoyl Dopamine [M-H]	528189	-0.829353	0.8041	0.6038188	-0.2484618	0.8712	0.9426
FFA_Stearidonic Acid [M-H]	481336	-0.725131	0.7050	0.6048482	1.0456717	0.8160	0.7757
Putative_3-Hydroxystanozolol glucuronide	271639	-0.912766	0.8892	0.6050845	1.2296567	1.0464	0.8060
EIC_314	153636	0.652162	0.6378	0.6054472	-1.8080673	2.2916	0.8365
Polar Molecule_ELAIDATE [M-H+Acetate]	527688	0.672674	0.6572	0.6054472	1.0593755	1.0207	0.8098
Sterol_11-keto-testosterone [M-H+Acetate]	157340	-0.657137	0.6512	0.6119992	-0.0890365	0.7688	0.9826
FFA_Linoleic Acid† [M-H+Acetate]	528408	1.137782	1.1251	0.6119992	2.8118858	1.1866	0.5426
VLCDCA_1	531896	-0.995871	0.9842	0.6119992	-0.0463797	0.9661	0.9836
VLCDCA_42	540422	0.818607	0.8117	0.6119992	-0.4576330	0.7118	0.8560
Eicosanoid_13,14-dihydro-15-keto-tetranor-PGF1alpha [M-H+Acetate]	125021	0.648484	0.6558	0.6238264	1.1880990	0.5875	0.6637
Polar Molecule_PALMITOLEATE [M-H+Acetate]	520124	0.550078	0.5557	0.6238264	-1.6977053	1.1907	0.7604
FFA_Linoleic Acid† [M-H]	532109	-0.642120	0.6472	0.6238264	0.4503844	0.8387	0.8729
VLCDCA_1	533929	0.691074	0.6982	0.6238264	-0.6275195	0.7610	0.8313
Putative_a-Hyodeoxycholic acid methyl ester	343493	0.540630	0.5480	0.6242444	-0.1524606	0.5849	0.9426
Eicosanoid_12epi LTB4 [M-H+Acetate]	285289	0.820138	0.8329	0.6243334	-0.1873904	0.7061	0.9426
EIC_15	412685	-1.012011	1.0335	0.6279152	-0.6589780	0.9572	0.8504
EIC_79	252002	0.547641	0.5633	0.6304131	0.8923317	0.7289	0.7913
Eicosanoid_tetranor-PGFM [M-H]	29345	-0.765151	0.7880	0.6304131	-0.2518445	0.8184	0.9426
FAHFA_8	518912	-0.664242	0.6852	0.6304131	0.6864155	0.6442	0.8094
EIC_55	297605	0.528521	0.5503	0.6364075	0.4724098	0.6277	0.8414
Eicosanoid_5(S) HETrE [M-H]	501853	-0.461717	0.4831	0.6384330	1.3171768	0.5723	0.5856
Eicosanoid_EPA [M-H]	518723	-0.562895	0.5914	0.6404776	0.5687187	0.5048	0.8094
Putative_Monolinolenin (9c,12c,15c)	341483	0.452333	0.4772	0.6426162	1.0283090	0.5199	0.6637
Sterol_Estrone [M-H+Acetate]	202817	1.329261	1.4070	0.6430966	0.5102278	0.9896	0.8776
Eicosanoid_14,15 LTC4 [M-H]	264928	1.055824	1.1207	0.6430966	4.0848983	2.4189	0.6688
Endocannabinoid_Oleoyl Ethanolamide [M-H+Acetate]	522175	0.561964	0.5964	0.6430966	0.2631562	0.9441	0.9426
Eicosanoid_14,15 LTD4 [M-H+Acetate]	258994	0.616954	0.6600	0.6483693	0.5605265	0.9626	0.8665
FFA_Palmitic Acid† [M-H+Acetate]	534889	0.756090	0.8121	0.6502629	1.6454658	0.8766	0.6637
Polar Molecule_allo-Tetrahydrocortisol [M-H+Acetate]	84478	0.658109	0.7120	0.6550717	-0.5268092	0.8405	0.8592
Putative_Hydrocortisone 21-hemisuccinate	111837	0.775021	0.8467	0.6582218	-0.9210254	0.6828	0.7604
Bile Acid_Ursodeoxycholic acid [M-H+Acetate]	241332	1.028946	1.1257	0.6582218	0.7601168	0.7098	0.8094
EIC_358	269922	-0.575733	0.6297	0.6582218	-1.0952351	0.7443	0.7604
Putative_Heneicosapentaenoic acid	524788	-0.927935	1.0150	0.6582218	1.3512596	0.8453	0.7120
Putative_Hydrocortisone	107173	0.474398	0.5274	0.6583944	-0.9853924	0.5828	0.6688
Polar Molecule_CORTISOL [M-H]	111875	0.859983	0.9514	0.6583944	-0.8958431	0.7074	0.7776
Eicosanoid_11-dehydro-TXB3 [M-H+Acetate]	146386	-0.382148	0.4260	0.6583944	0.4442002	0.5081	0.8298
Polar Molecule_CORTEXOLONE [M-H]	153590	-0.548498	0.6068	0.6583944	-1.2203532	0.8320	0.7604
EIC_257	249793	0.479771	0.5342	0.6583944	0.2926562	0.6658	0.8953
EIC_303	338181	0.671960	0.7469	0.6583944	0.0724849	0.5809	0.9826
EIC_122	368273	0.887540	0.9894	0.6583944	-0.5927475	1.0539	0.8717
Eicosanoid_EPA [M-H+Acetate]	523035	0.532378	0.5933	0.6583944	0.2552272	0.6847	0.9256
Eicosanoid_Arachidonic Acid [M-H]	525365	-0.669080	0.7425	0.6583944	0.2575294	0.6764	0.9206
VLCDCA_6	532891	-1.230413	1.3750	0.6583944	-1.0725899	1.1359	0.8228
VLCDCA_23	533191	-0.767118	0.8570	0.6583944	0.1326033	0.6803	0.9611
FAHFA_56	530580	0.833570	0.9345	0.6595123	-1.0927743	0.8904	0.7913
EIC_144	256466	0.789496	0.8883	0.6609626	-0.4740107	0.9981	0.8919
FFA_Eicosadienoic Acid† [M-H+Acetate]	531329	1.698470	1.9225	0.6623761	2.4721168	1.7753	0.7604
VLCDCA_40	537628	0.800166	0.9071	0.6623761	-1.1856697	0.7756	0.7508
VLCDCA_41	540711	0.837434	0.9485	0.6623761	-0.2561897	0.8690	0.9426
Eicosanoid_13-oxoODE [M-H+Acetate]	402537	0.488855	0.5585	0.6672669	-0.1364529	0.7584	0.9660
Polar Molecule_CORTISOL [M-H+Acetate]	100025	0.498839	0.5837	0.6726660	-0.6157631	0.5103	0.7977
Polar Molecule_LIOTHYRONINE [M-H]	116699	0.644818	0.7614	0.6726660	0.2341696	0.5854	0.9142
Novel EIC_35	136210	0.414707	0.4889	0.6726660	-0.9126302	0.7668	0.8028
EIC_333	191164	-0.553214	0.6548	0.6726660	0.4463980	0.7011	0.8568
Eicosanoid_13,14-dihydro-PGE1 [M-H]	195187	-0.565809	0.6620	0.6726660	0.5581366	0.5765	0.8126
EIC_229	199695	0.460206	0.5384	0.6726660	-0.2809916	0.4890	0.8707
EIC_178	244703	0.436033	0.5136	0.6726660	0.1628243	0.6642	0.9521
EIC_71	305288	0.923307	1.0713	0.6726660	-1.7692354	1.3471	0.7672
Eicosanoid_18(+/-)-HETE [M-H+Acetate]	377399	-0.561561	0.6592	0.6726660	0.4007456	0.5937	0.8519
Eicosanoid_12S-HpEPE [M-H]	382329	0.498000	0.5799	0.6726660	0.0026282	0.7516	0.9996
Bile Acid_Lithocholic Acid [M-H]	442558	0.650047	0.7683	0.6726660	-0.4733190	0.9413	0.8792
Polar Molecule_MYRISTATE [M-H]	519152	0.612965	0.7261	0.6726660	-0.7615092	0.7519	0.8101
FAHFA_18	522272	-0.496309	0.5736	0.6726660	0.8458705	0.7899	0.8094
FFA_Palmitic Acid† [M-H]	533569	-0.400539	0.4643	0.6726660	0.2120537	0.7140	0.9426
VLCDCA_12	535370	-0.549521	0.6492	0.6726660	-0.3927430	1.1333	0.9409
VLCDCA_17	534730	-0.648589	0.7705	0.6734416	0.1952133	1.0072	0.9611
Novel EIC_13	423715	-0.559651	0.6733	0.6781866	0.4151999	0.8544	0.8909
FFA_a-linolenic Acid† [M-H]	521670	-0.704837	0.8475	0.6781866	-0.0266652	0.9101	0.9876
FFA_Linoleic Acid† [M-H+Acetate]	526555	1.640411	1.9651	0.6781866	0.3286237	1.7097	0.9611
Polar Molecule_LUMICHROME [M-H]	57910	1.782782	2.1479	0.6781866	-1.0630897	1.2308	0.8298
Endocannabinoid_N-arachidonoyl Dopamine [M-H]	515028	-0.628357	0.7608	0.6804868	0.4363462	0.9555	0.8919
Polar Molecule_CORTISOL [M-H+Acetate]	111953	0.725939	0.8852	0.6821197	-1.0313409	0.7240	0.7604
Polar Molecule_CORTEXOLONE [M-H+Acetate]	155822	0.654528	0.7976	0.6821197	-0.6379518	0.7004	0.8271
Eicosanoid_15-epi-PGA1 [M-H+Acetate]	253524	0.539328	0.6584	0.6821197	0.3642913	0.5702	0.8568
FFA_Stearidonic Acid [M-H]	488156	-1.345991	1.6497	0.6836561	-1.4697696	1.5042	0.8126
EIC_10	440807	2.019214	2.5364	0.7008675	-0.4021736	0.6122	0.8552
Endocannabinoid_N-arachidonoyl Dopamine [M-H+Acetate]	518573	-0.578025	0.7315	0.7048668	0.2666457	0.6914	0.9205
FFA_Oleic Acid† [M-H+Acetate]	532675	0.704359	0.8939	0.7054293	0.0935776	0.9850	0.9826
Novel EIC_6	221883	-0.492071	0.6265	0.7062176	-2.0991542	1.3388	0.7309
EIC_225	266128	-0.561375	0.7190	0.7074899	1.1903294	0.7555	0.7296
VLCDCA_1	534965	0.853113	1.0904	0.7074899	0.0664257	1.1867	0.9826
Putative_N-Oleoyl-L-serine	517674	0.453162	0.5852	0.7120522	0.4913678	0.6645	0.8414
Polar Molecule_OLEOYL-GLYCEROL [M-H+Acetate]	527254	-0.625156	0.8111	0.7139272	0.1452514	0.8952	0.9680
FFA_Palmitic Acid† [M-H+Acetate]	531306	-0.555246	0.7260	0.7180505	0.5321930	0.7180	0.8414
Bile Acid_Lithocholic Acid [M-H]	441724	0.564585	0.7420	0.7189938	0.4591317	0.6398	0.8414
FFA_Arachidic Acid† [M-H]	535084	0.737201	0.9695	0.7189938	-0.0491797	0.9064	0.9826
Eicosanoid_15d PGJ2 [M-H]	364658	0.499166	0.6652	0.7205861	1.9720548	1.0854	0.6637
Eicosanoid_13(S) HOTrE(y) [M-H+Acetate]	377311	0.499794	0.6647	0.7205861	1.0609522	0.9775	0.8094
FFA_Stearidonic Acid [M-H+Acetate]	487076	0.779500	1.0342	0.7205861	-2.3633500	1.9365	0.7913
FFA_Heptadecanoic Acid† [M-H+Acetate]	534128	0.366678	0.4854	0.7205861	1.6008775	0.9347	0.6688
VLCDCA_23	534469	-0.518707	0.6854	0.7205861	-0.7934448	0.7389	0.8094
Eicosanoid_13,14-dihydro-15-keto-tetranor-PGF1alpha [M-H+Acetate]	129125	0.547721	0.7346	0.7236186	2.0231481	0.6018	0.4598
EIC_250	186140	0.559964	0.7633	0.7277047	0.0646463	0.8878	0.9826
EIC_263	208281	0.333547	0.4515	0.7277047	-0.1914457	0.4550	0.9040
EIC_224	298220	0.647309	0.8793	0.7277047	-0.4849954	1.0485	0.8919
EIC_189	392686	0.444961	0.6084	0.7277047	0.9963065	0.5650	0.6637
Eicosanoid_EPA [M-H]	523009	0.423108	0.5774	0.7277047	0.2063667	0.6714	0.9426
FAHFA_42	531450	-0.492043	0.6690	0.7277047	-0.2584155	0.8943	0.9426
Putative_1a-Methyl-5a-androstan-3a,17b-diol glucuronide	108971	0.489219	0.7080	0.7336836	-0.4389427	0.8073	0.8717
Polar Molecule_Tetrahydrocortisol [M-H+Acetate]	123097	-0.662411	0.9230	0.7336836	-1.1607759	0.9323	0.7913
Putative_5a-Androstan-3a,17b-diol-17b-glucuronide	159009	-0.630941	0.8830	0.7336836	-0.6754169	0.8066	0.8313
EIC_229	184258	0.452184	0.6448	0.7336836	0.3378987	0.5985	0.8717
EIC_178	245971	-1.155709	1.6841	0.7336836	-1.9211673	1.2423	0.7371
Eicosanoid_7,17 dhDPA [M-H+Acetate]	286064	0.356693	0.5129	0.7336836	-0.7676408	0.4937	0.7371
EIC_271	297019	-0.480187	0.6663	0.7336836	0.5296872	0.8126	0.8552
EIC_348	329017	-0.369284	0.5267	0.7336836	-1.2922393	0.5936	0.6219
EIC_58	342155	1.137952	1.6524	0.7336836	-1.2769141	1.5490	0.8313
EIC_122	361269	0.589930	0.8431	0.7336836	-0.0223553	0.7561	0.9876
Eicosanoid_15(S) HEPE [M-H+Acetate]	371287	-0.585583	0.8584	0.7336836	0.8584492	1.3479	0.8568
Eicosanoid_18(+/-)-HETE [M-H+Acetate]	374735	-0.533713	0.7598	0.7336836	-1.7327182	1.8244	0.8228
EIC_87	387542	0.450389	0.6590	0.7336836	-0.2105467	0.6998	0.9426
Eicosanoid_15S-HpETE [M-H]	407687	0.518415	0.7556	0.7336836	1.1476131	0.7978	0.7604
Eicosanoid_11(12)-EpETE [M-H]	416960	0.401287	0.5866	0.7336836	0.2881100	0.5207	0.8717
Putative_Abietic acid	518727	-0.415049	0.6022	0.7336836	0.7050352	0.5320	0.7604
FFA_Myristic Acid [M-H]	520512	0.366583	0.5251	0.7336836	-2.2649051	1.3618	0.6688
FFA_Palmitoleic Acid† [M-H+Acetate]	523988	0.662946	0.9597	0.7336836	-2.0566472	0.7658	0.4896
Eicosanoid_DHA [M-H]	525743	-0.459630	0.6424	0.7336836	0.3345652	0.5376	0.8592
FAHFA_43	529622	-0.408139	0.5747	0.7336836	0.5620384	0.7629	0.8414
FFA_Docosaenoic Acid† [M-H+Acetate]	535281	0.650055	0.9380	0.7336836	0.7218621	1.0122	0.8414
FFA_Oleic Acid† [M-H]	535786	-0.486321	0.6743	0.7336836	0.8239130	0.7311	0.8094
VLCDCA_6	535897	0.485264	0.7047	0.7336836	-0.8333084	0.7653	0.8094
VLCDCA_40	540421	0.623382	0.9106	0.7336836	-2.1157880	1.3177	0.7120
Eicosanoid_11(12)-EpETE [M-H+Acetate]	421573	-0.442204	0.6518	0.7345096	-0.3982368	0.7262	0.8717
Bile Acid_Chenodeoxycholic acid [M-H+Acetate]	329139	1.520286	2.2479	0.7349677	0.1568712	2.0817	0.9826
VLCDCA_10	534972	0.598167	0.8911	0.7381740	-0.2671399	0.8385	0.9426
Putative_1-Stearoyl-2-hydroxy-sn-glycero-3-phosphoethanolamine	519992	0.544136	0.8132	0.7386568	-1.9111143	1.5082	0.7776
Bile Acid_Glycoursodeoxycholic Acid [M-H]	166774	0.596767	0.9008	0.7419025	-0.0908514	0.5706	0.9692
Putative_1-Palmitoyl-2-hydroxy-sn-glycero-3-phosphoethanolamine	444474	0.397370	0.5989	0.7419025	-0.4313177	0.5743	0.8414
Putative_Androstan-3-ol-17-one 3-glucuronide	167264	-0.433958	0.6657	0.7503537	-1.4139220	0.7906	0.6637
EIC_29	354579	0.698025	1.0794	0.7517668	0.4705576	0.7925	0.8656
Putative_2-Hydroxypalmitic acid	523924	-0.592689	0.9182	0.7517668	0.1964269	1.1416	0.9660
FAHFA_29	529339	0.396145	0.6115	0.7517668	-0.7736686	0.8051	0.8126
Polar Molecule_ROSMARINATE [M-H]	46338	0.472178	0.7430	0.7596721	0.9809835	1.1737	0.8313
Polar Molecule_BIOTIN [M-H]	31198	0.358106	0.5668	0.7601261	-0.4699491	0.8663	0.8717
EIC_122	365097	0.832776	1.3197	0.7601261	-1.4069718	1.3073	0.8094
Eicosanoid_Arachidonic Acid [M-H+Acetate]	531873	0.521566	0.8277	0.7601261	2.0166130	0.7057	0.4896
Putative_7a,17a-Dimethyl-5b-androstane-3a,17b-diol glucuronide	210760	-0.824765	1.3313	0.7652412	-1.6606171	1.6763	0.8126
EIC_91	329577	0.326551	0.5257	0.7652412	-0.3339051	0.6031	0.8717
Novel EIC_3	381111	-0.444189	0.7200	0.7652412	-0.3170556	0.6658	0.8919
EIC_189	389030	-0.369994	0.6064	0.7652412	0.3054902	0.8652	0.9363
FAHFA_57	531915	0.809621	1.3151	0.7652412	2.3655611	1.3082	0.6637
FFA_Arachidic Acid† [M-H+Acetate]	537842	0.484830	0.7939	0.7652412	0.8091862	0.7931	0.8101
FFA_Eicosenoic Acid [M-H]	539066	-0.475879	0.7755	0.7652412	0.9000502	0.6065	0.7604
FAHFA_69	541292	0.368272	0.6013	0.7652412	-0.1393745	0.6365	0.9556
Polar Molecule_OLEOYL-GLYCEROL [M-H]	531324	-0.489333	0.8054	0.7662154	-0.4466392	0.8603	0.8776
Polar Molecule_OLEOYL-GLYCEROL [M-H+Acetate]	528185	-0.620077	1.0268	0.7673226	0.3147801	1.0964	0.9426
Polar Molecule_LUMICHROME [M-H]	63608	1.125255	1.8656	0.7673226	-0.7038524	1.3775	0.8776
Novel EIC_40	183709	-0.363718	0.6072	0.7688365	-0.1346980	0.6606	0.9599
Docosanoid_7(S),17(S)-hydroxy DPA [M-H+Acetate]	270778	-0.469735	0.7851	0.7688365	-1.0170827	1.0024	0.8101
EIC_354	155807	0.524659	0.8820	0.7700266	-0.2725555	0.9502	0.9426
EIC_356	208342	-0.416946	0.7034	0.7700266	-0.1885163	0.7236	0.9426
EIC_143	315302	0.325808	0.5501	0.7700266	0.1615497	0.5412	0.9426
EIC_177	262111	0.336871	0.5724	0.7719812	-0.1217699	0.5649	0.9571
VLCDCA_8	532895	-0.350333	0.5974	0.7724641	-1.3632785	0.5445	0.5100
EIC_72	439727	0.495668	0.8571	0.7785243	-0.6494781	0.8954	0.8414
VLCDCA_2	534195	0.414564	0.7214	0.7804123	-0.5512837	0.7848	0.8439
Bile Acid_Ursodeoxycholic acid [M-H+Acetate]	232137	0.524402	0.9228	0.7849353	0.7511160	0.9256	0.8365
Putative_1-Arachidoyl-2-hydroxy-sn-glycero-3-phosphocholine	525258	0.328484	0.5801	0.7852985	-0.2512034	0.7044	0.9362
FFA_Heptadecaenoic Acid† [M-H]	531845	-0.354604	0.6326	0.7891027	0.2339753	0.6893	0.9426
EIC_91	326677	-0.382275	0.6884	0.7925424	-1.2368537	0.8517	0.7604
FFA_a-linolenic Acid† [M-H]	523928	-0.297262	0.5417	0.7966920	0.4768828	0.6524	0.8414
VLCDCA_15	533973	0.481721	0.8796	0.7966920	-0.1149222	0.8175	0.9795
FAHFA_12	520493	-0.296739	0.5467	0.7981967	0.3350629	0.5949	0.8717
Polar Molecule_PALMITOLEATE [M-H]	521338	0.431907	0.7957	0.7981967	1.1011068	0.9166	0.7977
EIC_209	228440	-0.272891	0.5058	0.7997379	-0.3763460	0.5595	0.8519
VLCDCA_7	542382	0.431956	0.8074	0.8024520	0.5771329	0.9753	0.8656
EIC_138	191819	0.653062	1.2405	0.8074401	-0.1395785	1.1416	0.9826
VLCDCA_44	544161	0.335609	0.6364	0.8074401	-0.1077313	0.7467	0.9793
EIC_166	353621	0.533497	1.0181	0.8082135	0.3384755	0.7528	0.8926
EIC_31	411585	-0.312451	0.6048	0.8136604	-0.5413563	0.8377	0.8552
EIC_185	398537	-0.369636	0.7179	0.8137437	-1.0865618	0.7997	0.7604
Eicosanoid_14,15 LTE4 [M-H]	233290	-0.320432	0.6305	0.8177870	1.3305852	0.6142	0.6219
Putative_4-Androsten-17b-ol-3-one glucosiduronate	158439	0.483049	0.9618	0.8195351	1.0069831	0.7343	0.7604
Eicosanoid_8-iso-15-keto-PGE2 [M-H+Acetate]	178102	-0.335249	0.6675	0.8195351	-0.3495648	0.4362	0.8365
EIC_6	357386	-0.309407	0.6214	0.8220339	-0.1422220	0.6450	0.9556
EIC_177	263648	0.392387	0.8144	0.8340977	0.2735369	0.8713	0.9426
EIC_147	293675	0.618878	1.2988	0.8375725	-0.1186542	1.1513	0.9826
EIC_104	401285	0.391682	0.8486	0.8424396	0.3266518	0.5415	0.8656
EIC_191	412743	0.263049	0.5673	0.8424396	0.5148676	0.5728	0.8298
FFA_Heptadecanoic Acid† [M-H]	532380	-0.304174	0.6584	0.8424396	0.6090215	0.6480	0.8242
FFA_Eicosenoic Acid [M-H]	534395	-0.350422	0.7565	0.8424396	0.8063428	0.6700	0.7977
FFA_Docosadienoic Acid† [M-H]	539086	-0.767284	1.6625	0.8424396	-1.7780906	1.7369	0.8101
Novel EIC_35	134247	-0.214228	0.4809	0.8452050	-0.2819864	0.7247	0.9205
Putative_7a,17a-Dimethyl-5b-androstane-3a,17b-diol glucuronide	203097	-0.924889	2.0920	0.8452050	-1.2197052	2.0788	0.8656
Sterol_11-Deoxycorticosterone [M-H+Acetate]	228510	-0.262892	0.5988	0.8452050	0.4603270	0.7674	0.8656
Novel EIC_6	234484	0.275133	0.6065	0.8452050	0.4369219	0.5053	0.8298
Bile Acid_Lithocholic Acid [M-H+Acetate]	441749	-0.367502	0.8338	0.8452050	-0.6108988	0.8213	0.8414
Eicosanoid_14,15-EET [M-H+Acetate]	444412	-0.326077	0.7399	0.8452050	-2.0168112	1.3531	0.7604
Novel EIC_33	460414	-0.459240	1.0383	0.8452050	0.8273444	0.9252	0.8298
Polar Molecule_VITAMIN D2 [M-H]	531344	0.362448	0.8232	0.8452050	0.6308687	0.9697	0.8552
VLCDCA_11	537154	-0.244785	0.5516	0.8452050	0.1610536	0.5061	0.9426
Polar Molecule_NERVONATE [M-H]	537448	-0.419022	0.9439	0.8452050	0.9945802	0.9550	0.8098
FAHFA_69	542169	0.291369	0.6515	0.8452050	-0.3339372	0.7202	0.8919
Eicosanoid_15-epi-PGA1 [M-H+Acetate]	260175	-0.420080	0.9673	0.8480902	0.0725262	0.7585	0.9826
Eicosanoid_PGF1a [M-H]	167096	-0.230254	0.5562	0.8557034	0.5103436	0.4510	0.8094
Eicosanoid_PGF1a [M-H]	174973	-0.322685	0.7642	0.8557034	1.1763582	0.6281	0.6637
EIC_146	245286	-0.516931	1.2374	0.8557034	-0.7098005	0.7526	0.8228
Eicosanoid_15-epi-PGA1 [M-H+Acetate]	248240	-0.299971	0.7146	0.8557034	0.8190676	0.9549	0.8298
Eicosanoid_12-HHTrE [M-H+Acetate]	332750	-0.790766	1.9220	0.8557034	-0.4230574	1.2371	0.9426
EIC_192	402518	0.261354	0.6233	0.8557034	0.6741927	0.6457	0.8098
Endocannabinoid_D-erythro-Sphingosine C-18 [M-H+Acetate]	518988	-0.312988	0.7570	0.8557034	-0.0368705	0.6783	0.9826
Endocannabinoid_Stearoyl Ethanolamide [M-H+Acetate]	530121	-0.320540	0.7687	0.8557034	-0.6550866	0.6783	0.8126
FFA_Oleic Acid† [M-H+Acetate]	531868	0.294586	0.7145	0.8557034	1.6643910	0.6293	0.4896
Bile Acid_Ursodeoxycholic acid [M-H]	232041	0.398154	0.9716	0.8557224	0.6113273	1.0288	0.8656
EIC_58	348012	-1.468749	3.6795	0.8610083	-0.8811202	1.7268	0.8776
Eicosanoid_13-oxoODE [M-H+Acetate]	408537	-0.338595	0.8445	0.8610083	0.3005872	1.0274	0.9426
Eicosanoid_10-Nitrooleate [M-H]	510123	0.242881	0.6080	0.8610083	0.1238644	0.6225	0.9611
FAHFA_39	528335	-0.219153	0.5527	0.8619546	2.2596364	0.7915	0.4896
Polar Molecule_CORTISONE [M-H+Acetate]	118213	0.236956	0.6047	0.8647473	-0.6564439	0.7248	0.8281
EIC_338	297072	0.271584	0.7006	0.8671059	1.7474468	0.7017	0.5100
Polar Molecule_ELAIDATE [M-H]	527169	1.307181	3.4007	0.8686213	6.8172813	4.2574	0.7120
EIC_24	422518	0.260396	0.6916	0.8729729	-0.6429504	0.8280	0.8365
EIC_224	295140	0.191491	0.5138	0.8748801	-0.3403377	0.6489	0.8776
Putative_Codeine-6-b-D-glucuronide	119896	0.583999	1.5784	0.8755842	2.6978936	2.6162	0.8101
VLCDCA_42	544630	0.239232	0.6490	0.8755842	-0.7669687	0.6768	0.8094
Putative_6-((E)-2-((1R,2S,3R,5S)-3,5-Dihydroxy-2-((Z)-oct-2-enyl)cyclopentyl)vinyl)tetrahydro-2H-pyran-2-one	174904	-0.278811	0.7656	0.8776711	0.7214334	0.6810	0.8098
Eicosanoid_15-epi-PGA1 [M-H+Acetate]	244131	0.245936	0.6789	0.8776711	0.0742814	0.7307	0.9826
FAHFA_27	531614	0.386877	1.0703	0.8776711	0.4559170	1.0064	0.8919
FFA_Arachidic Acid† [M-H]	537803	0.356775	0.9944	0.8786009	0.5094233	0.8681	0.8656
EIC_4	345300	-0.149055	0.4181	0.8791712	-0.2922466	0.7490	0.9205
EIC_111	443405	-0.255987	0.7313	0.8836189	0.7796022	0.7476	0.8098
FFA_Heptadecanoic Acid† [M-H]	534537	-0.254157	0.7295	0.8836363	0.7453976	0.6889	0.8094
FAHFA_37	528301	0.197642	0.5746	0.8861462	1.3760645	0.5710	0.5426
EIC_178	251262	-1.088351	3.2225	0.8886235	0.5947573	2.5555	0.9521
Putative_D-erythro-Sphingosine-1-phosphate	377404	-0.259343	0.7704	0.8886235	0.4458910	0.5918	0.8414
VLCDCA_45	534494	-0.278292	0.8274	0.8886235	-0.9068354	0.9922	0.8271
FFA_Linoleic Acid† [M-H]	528366	-0.191451	0.5724	0.8888318	0.9603129	0.5025	0.6637
Docosanoid_7,8-DiHDPA [M-H+Acetate]	364346	-0.248521	0.7797	0.9016758	-0.0303964	0.7801	0.9854
EIC_205	215007	0.161552	0.5257	0.9066240	-0.0700110	0.6124	0.9826
Eicosanoid_17,18-DiHETE [M-H+Acetate]	268636	-0.197332	0.6367	0.9066240	-0.1438679	0.7028	0.9599
Eicosanoid_14(15) EpETE [M-H]	408497	-0.168254	0.5516	0.9066240	0.1599904	0.5234	0.9426
FFA_Tricosenoic Acid [M-H+Acetate]	536191	0.196706	0.6437	0.9066240	0.7662130	0.6787	0.8094
FFA_Docosadienoic Acid† [M-H]	536158	-0.288895	0.9671	0.9108395	0.7253302	0.9861	0.8414
VLCDCA_34	537603	-0.191905	0.6608	0.9140322	-0.8306730	0.6352	0.7672
VLCDCA_34	539456	-0.202889	0.6955	0.9140322	-0.7681555	0.6601	0.8065
Eicosanoid_15 oxoEDE [M-H+Acetate]	474392	-0.201913	0.7114	0.9156507	0.3738784	0.8272	0.8919
FAHFA_48	529646	0.175261	0.6170	0.9156507	0.8393571	0.9913	0.8313
FFA_Oleic Acid† [M-H]	531847	0.208027	0.7339	0.9156507	1.3178308	0.6348	0.6637
Putative_4-[5-[[4-[5-[acetyl(hydroxy)amino]pentylamino]-4-oxobutanoyl]-hydroxyamino]pentylamino]-4-oxobutanoic acid	390962	-0.207045	0.7413	0.9163945	0.6454698	0.8255	0.8365
Polar Molecule_PALMITATE [M-H+Acetate]	527462	-0.316605	1.1318	0.9163945	1.1927341	1.1492	0.8098
Eicosanoid_14,15-diHETrE [M-H+Acetate]	323938	-0.409939	1.4786	0.9167417	0.1472051	1.6781	0.9826
EIC_182	323049	-0.287488	1.0495	0.9172309	0.2460149	0.9429	0.9426
Novel EIC_18	420737	-0.144808	0.5360	0.9172309	0.7252618	0.5546	0.7672
FFA_Eicosatrienoic Acid† [M-H+Acetate]	534431	-0.143267	0.5305	0.9172309	1.6755464	1.0326	0.6985
FFA_Tricosenoic Acid [M-H+Acetate]	537869	0.193903	0.7101	0.9172309	0.2480342	0.5992	0.9074
FFA_Pentadecanoic Acid† [M-H+Acetate]	531478	-0.181702	0.6859	0.9193490	1.5492093	1.1323	0.7604
VLCDCA_2	533159	-0.205340	0.7816	0.9193490	0.3098745	0.9484	0.9426
FFA_Stearic Acid† [M-H+Acetate]	534421	0.209367	0.7952	0.9193490	1.6687758	1.2055	0.7604
EIC_183	455310	0.172410	0.6808	0.9248533	0.6203561	0.6332	0.8126
FFA_Stearic Acid† [M-H]	533317	0.198333	0.7781	0.9248533	1.0754155	0.9041	0.8028
Putative_7a,17a-Dimethyl-5b-androstane-3a,17b-diol glucuronide	199356	-0.518940	2.0687	0.9255015	-2.8281345	2.3531	0.7977
EIC_177	274066	-0.231444	0.9545	0.9299958	0.5589078	0.7750	0.8414
FAHFA_11	520688	0.177251	0.7274	0.9299958	-0.0308322	0.7302	0.9852
Putative_Levofloxacin	41558	-0.119435	0.5010	0.9321503	0.0011563	0.6566	0.9996
FFA_Palmitic Acid† [M-H+Acetate]	531996	0.156589	0.6626	0.9325004	0.7500516	0.7226	0.8098
EIC_189	386159	0.223811	0.9697	0.9329448	-0.0500392	0.8555	0.9826
FFA_Docosaenoic Acid† [M-H]	535834	-0.287431	1.2343	0.9329448	-1.3831971	1.1322	0.7913
Eicosanoid_Arachidonic Acid [M-H]	527450	-0.122893	0.5649	0.9432264	1.7653461	0.6545	0.4896
EIC_146	251251	-0.215426	1.0338	0.9438987	-0.5034350	0.6468	0.8365
Eicosanoid_19(R)-HETE [M-H]	367701	0.122984	0.5855	0.9438987	0.3327275	0.5809	0.8707
Eicosanoid_5S-HpEPE [M-H+Acetate]	402588	-0.154265	0.7206	0.9438987	-0.5410002	0.6011	0.8298
Putative_Dodecylbenzenesulfonic acid	403895	0.202145	0.9581	0.9438987	-0.3686178	0.8630	0.9011
VLCDCA_11	534221	-0.156980	0.7483	0.9438987	-0.5377469	0.7619	0.8439
VLCDCA_17	532189	-0.241787	1.1703	0.9439718	-0.7361468	0.8042	0.8271
Docosanoid_MCTR2 [M-H]	208505	0.163861	0.8187	0.9456837	0.9937600	0.7709	0.7755
FFA_a-linolenic Acid† [M-H]	520524	0.136049	0.6762	0.9456837	0.2505891	0.5480	0.8919
FFA_Myristic Acid [M-H+Acetate]	524395	0.161278	0.8079	0.9456837	0.4573819	0.8470	0.8717
Docosanoid_7(S),17(S)-hydroxy DPA [M-H+Acetate]	275325	-0.116759	0.5907	0.9459312	0.3465067	0.7939	0.8954
Eicosanoid_5,6-EET [M-H]	473277	-0.131627	0.6854	0.9484223	0.6423328	0.6358	0.8101
Eicosanoid_Arachidonic Acid [M-H]	529143	-0.113270	0.5916	0.9484223	1.4385530	0.7244	0.6637
FFA_Oleic Acid† [M-H]	534665	-0.131987	0.7025	0.9500663	1.5349371	0.8571	0.6637
EIC_158	238213	-1.526087	8.3917	0.9518453	1.7088970	5.5391	0.9426
Docosanoid_10,11-DiHDPA [M-H+Acetate]	346852	-0.129564	0.7166	0.9518453	-1.4081730	0.6674	0.6596
FAHFA_58	531777	0.220873	1.2179	0.9518453	2.0794755	1.1769	0.6637
EIC_351	175055	-0.118166	0.6953	0.9543641	-0.0462434	0.6361	0.9826
Eicosanoid_9-oxoOTrE [M-H+Acetate]	368320	0.134456	0.7875	0.9543641	-1.0434188	1.0040	0.8098
FAHFA_13	525986	0.130984	0.7729	0.9543641	-0.1261745	0.9186	0.9808
Bile Acid_Ursodeoxycholic acid [M-H+Acetate]	244872	0.151728	0.9139	0.9544286	-0.6495813	0.9512	0.8504
EIC_189	381176	-0.088083	0.5289	0.9544286	0.3607748	0.5547	0.8552
Bile Acid_Glycoursodeoxycholic Acid [M-H]	173155	0.228658	1.4727	0.9593419	-0.3354557	1.4257	0.9521
EIC_205	221256	0.100249	0.6390	0.9593419	-0.3599869	0.5483	0.8552
EIC_15	409677	0.108458	0.6985	0.9593419	-1.6585158	0.9698	0.6688
Novel EIC_6	233564	0.095273	0.6388	0.9631619	1.3333575	0.7455	0.6637
EIC_83	335777	0.125597	0.8828	0.9638022	-1.0785659	1.3055	0.8313
Novel EIC_3	375923	-0.136667	0.9736	0.9638022	-0.7976826	1.0224	0.8365
Endocannabinoid_N-oleoyl Dopamine [M-H]	529004	0.104033	0.7181	0.9638022	0.3406750	0.8062	0.9039
VLCDCA_14	537555	-0.111085	0.7718	0.9638022	-1.0036302	0.8060	0.7913
VLCDCA_28	544581	0.086922	0.6213	0.9638022	-0.7934428	0.6674	0.8028
FAHFA_4	509868	0.222865	1.6366	0.9640905	-0.3421059	1.2703	0.9426
FFA_Heptadecaenoic Acid† [M-H+Acetate]	532672	-0.090762	0.6660	0.9640905	0.9462112	0.9365	0.8101
VLCDCA_8	534206	0.088684	0.6886	0.9689427	-1.2086888	0.6921	0.6637
FFA_Myristic Acid [M-H]	524668	0.085954	0.7034	0.9731149	0.3804122	0.6791	0.8717
VLCDCA_8	537536	-0.119174	0.9906	0.9732751	-0.0653738	0.9730	0.9826
Eicosanoid_13,14-dihydro-15-keto-tetranor-PGD2 [M-H+Acetate]	125018	0.072142	0.7110	0.9747654	-0.0003726	0.7726	0.9996
EIC_250	191117	-0.060804	0.5439	0.9747654	0.6109959	0.7123	0.8298
EIC_158	235415	-0.582453	5.7251	0.9747654	-0.4886643	4.4533	0.9826
Putative_11a-Hydroxyprogesterone b-D-glucuronide	282628	-0.086278	0.7728	0.9747654	-0.2880203	1.0373	0.9426
EIC_7	401671	0.097516	0.9394	0.9747654	2.0978096	0.9517	0.6219
Putative_1-Palmitoyl-2-hydroxy-sn-glycero-3-phosphoethanolamine	452730	-0.119769	1.1558	0.9747654	-0.8914268	1.1538	0.8379
FAHFA_12	523559	0.110300	1.0265	0.9747654	1.1259866	0.9630	0.8060
FAHFA_28	527378	-0.055877	0.4947	0.9747654	1.8325687	0.7873	0.5731
FFA_Oleic Acid† [M-H]	530347	-0.075980	0.6687	0.9747654	1.1885429	0.6598	0.6637
FFA_Heptadecanoic Acid† [M-H+Acetate]	534900	0.091750	0.8623	0.9747654	1.1671325	1.0885	0.8094
Polar Molecule_Tetrahydrocortisol [M-H+Acetate]	138195	0.066491	0.6857	0.9756794	-0.6240463	0.7582	0.8313
Eicosanoid_13,14-dihydro-PGF1a [M-H]	195192	-0.080076	0.8225	0.9756794	0.6793127	0.9969	0.8504
VLCDCA_32	537601	0.066326	0.7132	0.9775756	-0.6460300	0.6822	0.8228
Endocannabinoid_2-Arachidonyl glycerol ether [M-H+Acetate]	526318	-0.095653	1.0948	0.9808519	0.7853712	0.9432	0.8313
EIC_138	201561	-0.063612	0.7942	0.9827263	-0.4221336	0.7807	0.8717
Eicosanoid_20cooh AA [M-H]	356342	0.051301	0.6414	0.9827263	-0.1720377	0.6201	0.9426
FFA_a-linolenic Acid† [M-H+Acetate]	520570	0.058859	0.7267	0.9827263	0.1024785	0.5694	0.9660
Putative_4-Androsten-17b-ol-3-one glucosiduronate	153131	0.077299	0.9897	0.9828540	-0.1583858	0.9532	0.9666
Eicosanoid_15d PGJ2 [M-H]	364207	-0.040782	0.5370	0.9832274	0.5141965	0.6899	0.8414
Eicosanoid_DHA [M-H+Acetate]	529467	-0.044160	0.6011	0.9838523	1.0587166	0.7653	0.7604
EIC_358	264609	-0.037290	0.5491	0.9870431	-0.1406923	0.5833	0.9521
Putative_Codeine-6-b-D-glucuronide	111091	0.071289	1.6545	0.9918409	1.7763829	2.2241	0.8365
Docosanoid_7(S),17(S)-hydroxy DPA [M-H+Acetate]	283207	0.038316	0.7350	0.9918409	-0.4249179	0.8182	0.8776
EIC_251	297013	0.045923	0.9346	0.9918409	0.8322440	0.9501	0.8298
Eicosanoid_19(R)-HETE [M-H]	362815	-0.035952	0.7092	0.9918409	0.4403072	0.8094	0.8717
EIC_87	390659	0.034087	0.7246	0.9918409	-0.1275289	0.7040	0.9660
EIC_111	454288	-0.040869	0.7473	0.9918409	1.0362071	0.7766	0.7604
Polar Molecule_PALMITATE [M-H+Acetate]	529748	0.032867	0.6034	0.9918409	-0.3086728	0.8410	0.9278
FFA_Stearic Acid† [M-H+Acetate]	533106	0.043078	0.7676	0.9918409	0.1157079	0.8983	0.9826
VLCDCA_6	534200	0.033009	0.7526	0.9918409	-0.1248213	0.7537	0.9666
Eicosanoid_11b PGE2 [M-H]	104963	-0.022719	0.6536	0.9922978	0.1774631	0.5265	0.9426
Bile Acid_Ursodeoxycholic acid [M-H]	245404	0.030457	1.2964	0.9922978	-1.6186822	1.5604	0.8098
EIC_185	397318	0.030617	0.9674	0.9922978	-0.8314612	0.9739	0.8313
EIC_82	445680	-0.014877	0.5523	0.9922978	0.2075208	0.5865	0.9363
FFA_Palmitoleic Acid† [M-H+Acetate]	529152	-0.026440	0.9234	0.9922978	-0.6713894	1.0130	0.8552
Polar Molecule_STEARATE [M-H]	530351	0.023386	0.6368	0.9922978	-0.0427503	0.7036	0.9826
Eicosanoid_Arachidonic Acid [M-H]	531480	0.017781	0.7531	0.9922978	0.4993480	0.6759	0.8414
FFA_Docosadienoic Acid† [M-H]	534554	0.020897	0.8551	0.9922978	1.2010160	0.9149	0.7672
Putative_2a-Methyl-5a-androstan-3a-ol-17-one glucuronide	92507	-0.021573	0.9118	0.9922978	-0.6068207	0.7925	0.8412
Novel EIC_6	229056	0.009933	0.5991	0.9928582	-0.6879488	0.6323	0.8094
VLCDCA_26	539195	-0.012402	0.7116	0.9928582	-1.4163488	0.7113	0.6637
VLCDCA_44	547731	0.008952	0.5639	0.9928582	0.1955706	0.6861	0.9426
EIC_158	232601	-0.009832	0.7436	0.9929884	-0.7406485	0.9536	0.8365
FAHFA_27	528052	-0.006559	0.5354	0.9929884	0.9494996	0.8898	0.8094
Eicosanoid_DHA [M-H]	529758	-0.004951	0.5456	0.9935952	2.2027324	0.9261	0.5426

## Sheet: Supplementary Table 8.
Supplementary Table 8. The effect of intensive fat mass loss and fat mass regain on LC-MS-Metabolome in the diet group compared to control group of physique study participants, when adjusted with energy availability
Annotation and adduct information		PRE-MID			PRE-POST
Metabolite ID	Matching ID	Estimate	Standard error	FDR	Estimate	Standard error	FDR
Polar Molecule_TRICOSANOATE [M-H]	539374	4.127788	0.7822	9.423e-05	-1.312304	0.7299	0.43256
Eicosanoid_13S-HpOTrE(gamma) [M-H]	387101	4.713758	0.9671	3.929e-04	-1.335418	1.0489	0.62163
Novel EIC_5	373373	2.878196	0.6288	8.464e-04	0.411670	0.6865	0.85216
FFA_Tricosenoic Acid [M-H]	539371	3.821229	0.8303	8.464e-04	-1.417421	0.6443	0.34143
EIC_260	267578	2.603893	0.6093	2.768e-03	0.501472	0.4900	0.69213
Putative_1-Oleoyl-sn-glycero-3-phosphoethanolamine	463104	3.982076	0.9640	4.333e-03	-1.116230	0.7814	0.56201
Polar Molecule_CORTISONE [M-H+Acetate]	106542	2.195852	0.5536	7.498e-03	1.163666	0.6432	0.42543
FFA_Lignoceric Acid† [M-H]	544841	3.212954	0.8237	8.628e-03	-1.136050	0.8214	0.58453
EIC_64	296371	7.170808	1.8540	8.777e-03	1.144222	0.8380	0.59496
Novel EIC_9	424299	5.117001	1.3485	1.064e-02	-1.616858	0.8045	0.39450
EIC_233	167632	3.944700	1.0586	1.270e-02	0.563442	1.0164	0.86027
EIC_17	404135	3.453594	0.9354	1.332e-02	0.764295	0.8520	0.74233
FFA_Tricosanoic Acid† [M-H]	544047	2.491138	0.6854	1.541e-02	-0.557571	0.6899	0.76268
Eicosanoid_9(S) HOTrE [M-H]	353929	2.916565	0.8100	1.629e-02	0.182174	0.5818	0.90194
EIC_125	185482	8.742101	2.5092	1.921e-02	-0.900256	1.1943	0.78704
EIC_71	312209	3.786634	1.0935	1.921e-02	1.111662	0.6984	0.51695
Eicosanoid_11,12-diHETrE [M-H+Acetate]	350152	4.956302	1.4268	1.921e-02	0.317840	0.8149	0.87856
EIC_345	397350	3.455738	0.9906	1.921e-02	-0.919259	0.9784	0.71783
Polar Molecule_OLEOYL-GLYCEROL [M-H]	523301	5.320971	1.5106	1.921e-02	-2.020612	1.2094	0.47866
Putative_N-Oleoyl-L-serine	524040	3.279671	0.9270	1.921e-02	-1.469611	0.5350	0.31878
Polar Molecule_GAMMA-LINOLENATE [M-H]	516521	-1.956997	0.5747	2.265e-02	0.420762	0.5789	0.79626
Bile Acid_Taurocholic Acid [M-H]	121166	8.230143	2.4389	2.310e-02	0.085527	1.3894	0.98802
EIC_121	285160	3.552623	1.0700	2.310e-02	-0.097478	0.6569	0.96470
EIC_63	399217	3.954664	1.1828	2.310e-02	0.050037	0.7911	0.98802
EIC_69	413523	4.141808	1.2469	2.310e-02	-0.303177	0.8994	0.89783
EIC_69	419015	5.154275	1.5492	2.310e-02	-0.426780	1.1188	0.88350
FFA_Behenic Acid† [M-H]	540593	1.905024	0.5636	2.310e-02	-0.814750	0.5600	0.55252
FFA_Behenic Acid† [M-H]	542037	3.498260	1.0435	2.310e-02	0.395282	0.7308	0.86027
EIC_52	240462	3.828104	1.1615	2.434e-02	0.178139	0.6523	0.90718
Novel EIC_28	457606	11.083252	3.3775	2.474e-02	-0.949049	1.0890	0.75396
FFA_Tricosenoic Acid [M-H]	542617	3.825682	1.1811	2.782e-02	-0.026167	0.6993	0.99479
Eicosanoid_14,15-DiHETE [M-H+Acetate]	298878	3.635151	1.1364	3.101e-02	-0.092657	0.7779	0.97430
EIC_62	263579	4.868106	1.5309	3.210e-02	0.348920	0.8156	0.87402
EIC_137	217947	2.849512	0.9036	3.232e-02	-0.371215	1.0330	0.89325
Bile Acid_b-Muricholic Acid [M-H]	235527	13.576543	4.3065	3.232e-02	-8.686991	4.5891	0.41381
Bile Acid_Chenodeoxycholic acid [M-H]	335887	13.579587	4.2935	3.232e-02	-8.717597	4.5438	0.41381
Bile Acid_b-Muricholic Acid [M-H+Acetate]	235588	13.439371	4.2849	3.323e-02	-8.016579	4.5313	0.44213
EIC_125	198399	6.064878	1.9402	3.353e-02	2.830111	2.7231	0.68554
Eicosanoid_tetranor 12(R) HETE [M-H+Acetate]	320002	2.203337	0.7097	3.423e-02	1.381250	0.7954	0.45507
Eicosanoid_12S-HpEPE [M-H]	392272	3.357693	1.0790	3.423e-02	0.449712	1.0071	0.87246
Bile Acid_Chenodeoxycholic acid [M-H+Acetate]	335959	12.934488	4.1923	3.481e-02	-8.317833	4.3702	0.41381
EIC_63	392256	5.308618	1.7624	4.163e-02	0.630847	1.3309	0.86537
EIC_23	437680	2.599134	0.8632	4.163e-02	-0.004687	0.8304	0.99725
FFA_Tricosanoic Acid† [M-H+Acetate]	542670	1.719759	0.5712	4.163e-02	-0.958628	0.5080	0.41381
EIC_184	334912	2.203289	0.7370	4.368e-02	0.891828	0.6249	0.56201
EIC_125	190567	3.230653	1.0877	4.458e-02	1.849555	1.8869	0.70392
EIC_62	253339	8.646946	2.9098	4.458e-02	0.470638	1.1614	0.87856
Eicosanoid_15 oxoEDE [M-H+Acetate]	467225	2.994355	1.0159	4.664e-02	1.276237	0.8749	0.55252
Polar Molecule_OLEOYL-GLYCEROL [M-H]	522767	3.850565	1.3085	4.664e-02	-0.477551	1.1243	0.87402
FFA_Lignoceric Acid† [M-H+Acetate]	546323	4.762429	1.6246	4.664e-02	0.453513	0.8437	0.86027
Eicosanoid_13,14-dihydro-15-keto-PGA2 [M-H+Acetate]	253519	6.581214	2.2656	4.720e-02	0.305440	1.0200	0.90194
Eicosanoid_11,12-diHETrE [M-H]	355943	2.497672	0.8601	4.720e-02	0.764861	0.6938	0.68443
EIC_20	393655	3.204475	1.0992	4.720e-02	-0.868953	1.1400	0.78198
FFA_Tricosanoic Acid† [M-H]	542623	1.716001	0.5919	4.720e-02	-1.050614	0.5584	0.41381
EIC_71	298732	3.297938	1.1511	4.915e-02	-0.070722	0.8184	0.98454
EIC_14	394634	6.877651	2.4004	4.915e-02	1.146751	1.1255	0.69259
FFA_Nervonic Acid† [M-H]	541517	2.138356	0.7425	4.915e-02	1.189624	0.5167	0.34143
Putative_1a-Methyl-5a-androstan-3a,17b-diol glucuronide	96184	1.885054	0.6563	4.915e-02	0.443830	1.3051	0.89783
Eicosanoid_5,6-EET [M-H]	467558	-1.828223	0.6430	5.181e-02	-0.366947	0.7753	0.86537
EIC_271	281689	3.952918	1.4018	5.204e-02	0.899114	0.7316	0.62163
Eicosanoid_5,6-diHETrE [M-H]	383602	1.550978	0.5506	5.204e-02	0.945899	0.8204	0.66539
Putative_1-Pentadecanoyl-sn-glycero-3-phosphocholine	394443	1.513680	0.5361	5.204e-02	-1.069739	0.6989	0.53871
EIC_16	399201	2.343283	0.8304	5.204e-02	0.326374	0.7255	0.87246
FFA_Nervonic Acid† [M-H]	545847	2.456569	0.8661	5.204e-02	0.540442	0.8180	0.83207
EIC_229	193228	1.621173	0.5832	5.716e-02	0.784904	0.7479	0.68554
FFA_Palmitoleic Acid† [M-H]	526135	-1.428363	0.5152	5.716e-02	0.301139	0.5863	0.86325
FFA_Behenic Acid† [M-H+Acetate]	542079	3.072885	1.1081	5.716e-02	-0.237956	0.7526	0.90194
Novel EIC_9	422540	3.703251	1.3400	5.790e-02	-2.395963	0.8547	0.31878
EIC_69	416464	4.421757	1.6031	5.804e-02	-0.761745	1.0350	0.79234
Polar Molecule_CORTISONE [M-H+Acetate]	100714	1.941369	0.7090	6.088e-02	1.157459	0.6175	0.41381
Polar Molecule_N-ACETYLTRYPTOPHAN [M-H+Acetate]	49032	-2.856474	1.0457	6.123e-02	-0.294354	0.8904	0.89840
Eicosanoid_PGG2 [M-H+Acetate]	192014	-2.577815	0.9453	6.130e-02	-1.990697	0.9176	0.34143
FFA_Palmitoleic Acid† [M-H]	529701	-1.488557	0.5483	6.276e-02	1.096655	0.6693	0.49320
FFA_Lignoceric Acid† [M-H]	546284	4.910837	1.8252	6.661e-02	0.430098	0.9038	0.86537
EIC_121	298758	2.929053	1.0917	6.723e-02	-1.704921	0.9100	0.41381
EIC_22	406441	1.788678	0.6723	7.098e-02	0.392660	0.7300	0.86027
EIC_158	226291	1.837648	0.6925	7.158e-02	-0.595300	1.1179	0.86027
EIC_51	336280	2.426919	0.9177	7.263e-02	-0.894547	0.9126	0.70392
EIC_156	253384	1.657334	0.6306	7.432e-02	1.143502	1.2042	0.71341
Eicosanoid_13S-HpOTrE [M-H]	370062	3.457154	1.3144	7.432e-02	-1.209139	0.8134	0.55252
EIC_73	294423	3.663035	1.4037	7.761e-02	-1.486666	0.8291	0.43357
EIC_29	356636	2.009242	0.7812	8.454e-02	0.878359	0.5819	0.55088
FFA_Nervonic Acid† [M-H]	544451	2.346440	0.9119	8.454e-02	-0.946711	0.8243	0.66744
Polar Molecule_HEPTADECANOATE [M-H]	529375	-1.653481	0.6448	8.548e-02	0.598360	0.8876	0.83045
FFA_Eicosenoic Acid [M-H]	533336	-2.012224	0.7896	8.841e-02	0.135525	0.8252	0.96038
Bile Acid_Deoxycholic Acid [M-H+Acetate]	353332	6.326815	2.4922	8.989e-02	-3.953992	1.6984	0.34143
Eicosanoid_11-dehydro-2,3-dinor-TXB2 [M-H+Acetate]	132844	4.005395	1.5832	9.013e-02	0.087225	0.6597	0.96747
EIC_47	197702	3.495779	1.3817	9.013e-02	0.791672	1.0724	0.79186
Eicosanoid_2,3-dinor-PGE1 [M-H+Acetate]	139967	-1.092072	0.4345	9.351e-02	-0.585576	0.5170	0.67276
Bile Acid_Deoxycholic Acid [M-H]	353270	5.863463	2.3469	9.645e-02	-3.800535	1.5956	0.34143
Bile Acid_Glycochenodeoxycholic Acid [M-H]	255997	5.136212	2.0656	9.711e-02	-1.749233	1.0406	0.47298
Novel EIC_10	347387	2.044417	0.8240	9.711e-02	0.298049	0.9359	0.90194
EIC_15	406050	2.074657	0.8351	9.711e-02	0.554926	0.9431	0.85554
Putative_Bilirubin	525957	-2.285512	0.9203	9.711e-02	-1.193387	0.9678	0.62163
EIC_65	333119	5.415051	2.2138	1.057e-01	0.016335	1.2719	0.99725
EIC_86	450186	-1.299287	0.5317	1.057e-01	-0.633680	0.6981	0.73361
EIC_306	316868	2.104012	0.8628	1.060e-01	0.392392	0.8957	0.87402
EIC_10	432853	-1.329754	0.5468	1.062e-01	0.495375	0.5985	0.76268
FFA_Palmitoleic Acid† [M-H+Acetate]	526018	-1.264268	0.5201	1.062e-01	0.478086	0.6148	0.77825
EIC_205	208847	1.395691	0.5779	1.098e-01	0.663216	0.5271	0.62163
EIC_51	330923	2.810805	1.1717	1.137e-01	0.662213	1.0671	0.84154
FFA_Heptadecaenoic Acid† [M-H]	529369	-1.692179	0.7068	1.141e-01	0.424831	0.9027	0.86537
Eicosanoid_PGE3 [M-H+Acetate]	145653	1.461037	0.6129	1.162e-01	0.774190	0.6662	0.66048
EIC_62	256944	4.470035	1.8798	1.170e-01	0.020333	1.1503	0.99725
EIC_9	408763	-1.915518	0.8083	1.185e-01	-0.901743	0.6759	0.60365
Putative_1-Stearoyl-2-hydroxy-sn-glycero-3-phosphoethanolamine	521802	1.379981	0.5868	1.233e-01	0.692080	0.7018	0.70392
EIC_15	410919	-1.831665	0.7842	1.275e-01	-1.697595	0.9873	0.45890
VLCDCA_1	531095	-1.588892	0.6821	1.285e-01	-0.499620	1.0606	0.86537
Bile Acid_Deoxycholic Acid [M-H+Acetate]	346895	12.503963	5.4279	1.335e-01	-6.551096	2.2053	0.31878
EIC_58	348012	3.464610	1.5052	1.335e-01	-1.029485	2.0178	0.86325
EIC_176	379289	2.627238	1.1384	1.335e-01	1.031362	0.5460	0.41381
Polar Molecule_LUMICHROME [M-H]	51894	2.126906	0.9215	1.335e-01	-0.009661	0.8687	0.99725
Putative_Chenodeoxycholic acid 24-acyl-b-D-glucuronide	236149	3.576391	1.5838	1.471e-01	0.316583	1.0615	0.90194
Bile Acid_Ursodeoxycholic acid [M-H+Acetate]	237318	3.919768	1.7349	1.471e-01	-1.784241	0.9377	0.41381
EIC_137	228394	1.366047	0.6100	1.518e-01	0.721166	0.5611	0.62163
Putative_PGPC	448001	7.468479	3.3341	1.518e-01	0.137061	1.2727	0.97836
Eicosanoid_13,14-dihydro-PGE1 [M-H]	185541	1.628151	0.7318	1.544e-01	-0.198611	0.5582	0.89503
EIC_156	264493	1.413907	0.6369	1.544e-01	0.767710	0.7876	0.70760
Novel EIC_8	433376	3.237179	1.4574	1.544e-01	-0.735041	0.8101	0.73361
EIC_77	435704	1.721821	0.7727	1.544e-01	0.344640	1.0281	0.89783
Eicosanoid_PGE3 [M-H+Acetate]	148936	1.335910	0.6027	1.545e-01	0.848941	0.6075	0.57720
EIC_267	224977	-1.937960	0.8785	1.548e-01	0.115040	1.2266	0.98413
Bile Acid_b-Muricholic Acid [M-H]	237948	21.702893	9.8329	1.548e-01	-9.589562	7.6987	0.62163
EIC_329	263763	1.244625	0.5643	1.548e-01	0.837754	0.7727	0.68482
EIC_312	348127	1.712283	0.7771	1.548e-01	0.411631	0.8258	0.86537
Eicosanoid_5,6-diHETrE [M-H]	390693	-2.342329	1.0659	1.560e-01	-2.824924	1.1934	0.34143
Eicosanoid_8(S) HETrE [M-H+Acetate]	445744	2.485257	1.1326	1.561e-01	-1.493227	1.4995	0.70217
Eicosanoid_11(12)-EpETE [M-H]	421508	-1.670086	0.7666	1.612e-01	-0.968233	1.1955	0.76268
Eicosanoid_PGG2 [M-H+Acetate]	184987	-2.301036	1.0608	1.614e-01	-1.061476	1.0244	0.68554
EIC_138	199063	1.301670	0.6012	1.614e-01	0.495371	0.5981	0.76268
Eicosanoid_tetranor-PGFM [M-H]	31459	-2.174879	1.0046	1.614e-01	-1.265984	1.0424	0.62163
Endocannabinoid_Oleoyl Ethanolamide [M-H+Acetate]	520172	-1.702449	0.7836	1.614e-01	-4.123411	2.1123	0.41381
FFA_Palmitoleic Acid† [M-H]	531843	-1.411688	0.6526	1.614e-01	0.984539	0.7560	0.62163
Eicosanoid_11-dehydro-2,3-dinor-TXB2 [M-H+Acetate]	136286	1.835730	0.8506	1.623e-01	-0.525443	0.6658	0.77244
Eicosanoid_13-HODE [M-H+Acetate]	397750	2.925659	1.3634	1.661e-01	-0.527183	0.8329	0.83772
Bile Acid_Tauroursodeoxycholic acid [M-H]	164435	3.233693	1.5169	1.701e-01	0.689244	1.7327	0.87856
FFA_Heptadecaenoic Acid† [M-H+Acetate]	531646	6.551764	3.0751	1.701e-01	-0.642764	1.5116	0.87402
Bile Acid_Ursodeoxycholic acid [M-H]	237244	3.830609	1.8059	1.717e-01	-1.858288	0.9679	0.41381
EIC_176	370103	1.717590	0.8097	1.717e-01	1.646633	0.7649	0.34143
Docosanoid_Resolvin E1 [M-H+Acetate]	110221	1.220948	0.5825	1.795e-01	1.179247	0.6829	0.45507
Putative_N-Oleoyl-L-serine	522459	2.338798	1.1145	1.795e-01	-2.216768	0.9301	0.34143
FAHFA_69	545400	2.466102	1.1773	1.795e-01	0.163508	1.0125	0.96129
Eicosanoid_5S-HpEPE [M-H]	400564	2.245171	1.0747	1.795e-01	0.119814	0.8163	0.96470
FFA_a-linolenic Acid† [M-H]	517566	-2.520259	1.2050	1.795e-01	-0.951880	0.8636	0.68443
Eicosanoid_13,14-dihydro-PGE1 [M-H]	198449	2.032503	0.9848	1.884e-01	2.262114	0.6806	0.21276
EIC_100	410589	-1.595342	0.7727	1.884e-01	-2.158431	1.1328	0.41381
EIC_205	212224	1.429678	0.6946	1.890e-01	0.509757	0.4046	0.62163
Eicosanoid_8,9-diHETrE [M-H]	357813	1.327868	0.6464	1.890e-01	1.464688	0.7251	0.38991
Eicosanoid_5,6-EET [M-H+Acetate]	470913	1.817003	0.8841	1.890e-01	-0.548571	0.8488	0.83492
EIC_1	325888	1.460897	0.7133	1.897e-01	-0.769970	0.9464	0.76268
Eicosanoid_Adrenic Acid [M-H]	530967	-1.078432	0.5268	1.897e-01	1.045264	0.7546	0.58453
EIC_303	328235	1.586011	0.7793	1.941e-01	0.079065	0.9559	0.98471
Putative_Androsterone glucuronide	170446	3.204073	1.5804	1.964e-01	-2.075339	0.6590	0.23546
EIC_101	433368	1.239649	0.6126	1.970e-01	0.663444	0.6756	0.70392
Putative_Abietic acid	514832	-3.959376	1.9694	2.020e-01	-1.015785	1.1951	0.76268
Eicosanoid_tetranor 12(R) HETE [M-H]	322224	1.265561	0.6319	2.032e-01	-0.480804	0.9154	0.86027
Polar Molecule_ERUCATE [M-H+Acetate]	533386	2.467896	1.2345	2.032e-01	-0.789207	0.6927	0.66810
FAHFA_62	533738	-1.774627	0.8896	2.032e-01	-2.147398	0.9967	0.34143
VLCDCA_7	539773	3.163637	1.5853	2.032e-01	-0.174088	0.7816	0.93583
EIC_80	365075	1.582902	0.8002	2.053e-01	1.158558	0.9263	0.62163
Eicosanoid_8,9-diHETrE [M-H+Acetate]	365688	1.672289	0.8456	2.053e-01	1.301734	0.9758	0.60365
EIC_33	446442	1.647631	0.8312	2.053e-01	-2.803196	1.9290	0.55252
Putative_PGPC	447166	7.501219	3.7886	2.053e-01	0.030955	0.7288	0.99234
FAHFA_71	537708	1.682980	0.8470	2.053e-01	1.065128	0.8615	0.62163
Putative_Monolinolenin (9c,12c,15c)	343482	1.245070	0.6319	2.076e-01	1.496616	0.6801	0.34143
Eicosanoid_11t LTE4 [M-H+Acetate]	275412	1.312598	0.6675	2.083e-01	1.497844	0.6286	0.34143
EIC_124	240491	2.603374	1.3377	2.146e-01	1.449615	1.7428	0.76268
EIC_100	414042	1.740553	0.8935	2.146e-01	-0.218783	1.1312	0.94966
FAHFA_47	529594	-1.640143	0.8413	2.146e-01	1.528621	1.5973	0.71341
Eicosanoid_tetranor-PGFM [M-H]	29345	-1.432373	0.7398	2.183e-01	-0.408832	0.7467	0.86027
Putative_Androsterone glucuronide	179343	4.383107	2.2710	2.190e-01	-0.671902	0.7869	0.76268
EIC_65	321476	1.935563	1.0029	2.190e-01	-1.316808	0.8563	0.53718
Putative_Bilirubin	528314	-1.181959	0.6144	2.209e-01	0.281433	0.8455	0.89783
EIC_318	136905	0.940508	0.4917	2.241e-01	-0.100843	0.6055	0.95985
Putative_5a-Androstan-3a,17b-diol-17b-glucuronide	157904	-1.401190	0.7325	2.241e-01	-2.017873	0.7031	0.31878
Eicosanoid_13(S) HOTrE(y) [M-H]	373917	2.390151	1.2579	2.287e-01	-1.066416	0.7784	0.59280
FAHFA_15	527360	-1.773145	0.9338	2.287e-01	0.178673	0.8963	0.94740
Eicosanoid_15t-Protectin D1 [M-H+Acetate]	275324	-1.244557	0.6563	2.289e-01	-0.483995	0.7515	0.83492
Polar Molecule_N-ACETYLTRYPTOPHAN [M-H]	45049	1.413717	0.7473	2.299e-01	-0.444301	0.5781	0.77930
Bile Acid_Glycochenodeoxycholic Acid [M-H]	237311	2.198681	1.1661	2.320e-01	-1.067276	0.6134	0.45507
Eicosanoid_12-HETE [M-H+Acetate]	425444	1.403155	0.7477	2.354e-01	-0.338581	0.8311	0.87856
Polar Molecule_THYMIDINE-MONOPHOSPHATE [M-H+Acetate]	35550	-1.157686	0.6182	2.363e-01	-2.190655	1.0642	0.37441
Putative_Chenodeoxycholic acid 24-acyl-b-D-glucuronide	242299	3.500938	1.8824	2.381e-01	-0.536323	1.0274	0.86174
Eicosanoid_13(S) HOTrE(y) [M-H]	378072	2.261932	1.2145	2.381e-01	0.529186	0.6177	0.76268
Putative_2-Hydroxypalmitic acid	525710	-1.022400	0.5490	2.381e-01	0.226080	0.7942	0.90194
VLCDCA_15	533187	-1.111096	0.5972	2.381e-01	-1.334884	0.8179	0.49320
EIC_80	358635	-3.845194	2.0717	2.387e-01	-2.362385	0.7329	0.22769
EIC_110	433852	1.435288	0.7741	2.387e-01	0.343177	0.8634	0.87856
FFA_Tricosenoic Acid [M-H]	541791	1.644278	0.8880	2.387e-01	-2.185107	0.8338	0.34143
EIC_310	316877	1.498865	0.8137	2.427e-01	0.487371	0.8956	0.86027
EIC_124	238208	1.445745	0.7872	2.443e-01	0.263712	0.8489	0.90194
EIC_303	333176	1.700216	0.9286	2.462e-01	0.526826	0.8216	0.83492
EIC_31	407392	1.545973	0.8461	2.470e-01	1.929675	0.8490	0.34143
EIC_45	226969	0.999717	0.5479	2.472e-01	0.616832	0.6390	0.70803
EIC_68	383553	1.962454	1.0826	2.525e-01	-1.058348	0.7486	0.57096
Putative_Glycocholic acid	179340	4.194747	2.3243	2.557e-01	-1.003369	0.9128	0.68482
Novel EIC_13	426801	1.800907	0.9992	2.557e-01	0.453182	1.2118	0.88584
EIC_135	321522	1.312755	0.7308	2.578e-01	0.138612	0.7884	0.95966
EIC_157	292929	1.864517	1.0418	2.603e-01	-0.199049	0.9200	0.93833
Polar Molecule_NERVONATE [M-H+Acetate]	536198	2.205755	1.2386	2.641e-01	-1.367948	0.7489	0.42299
Putative_6-((E)-2-((1R,2S,3R,5S)-3,5-Dihydroxy-2-((Z)-oct-2-enyl)cyclopentyl)vinyl)tetrahydro-2H-pyran-2-one	167035	-1.061315	0.5973	2.643e-01	-0.341489	0.6100	0.86027
Eicosanoid_13,14-dihydro-PGF1a [M-H]	190593	-2.462444	1.3864	2.643e-01	-1.140932	0.9081	0.62163
Docosanoid_7-epi-Maresin 1 [M-H+Acetate]	254854	-6.160177	3.4735	2.645e-01	-1.330329	2.1064	0.83772
EIC_263	204232	0.975058	0.5510	2.654e-01	-0.379282	0.5655	0.83045
EIC_146	239745	0.918278	0.5209	2.680e-01	0.217831	0.4600	0.86537
Docosanoid_osbond acid, all-cis-4,7,10,13,16-DPA [M-H]	528114	-0.914548	0.5226	2.743e-01	1.782884	0.8016	0.34143
EIC_169	349398	1.361975	0.7820	2.766e-01	1.084473	0.6270	0.45507
FAHFA_76	545467	-1.446390	0.8303	2.766e-01	-1.736805	0.8301	0.37441
Novel EIC_24	466757	1.711320	0.9858	2.787e-01	-0.157791	1.0423	0.96470
EIC_250	195182	-1.079090	0.6230	2.797e-01	0.172427	0.6044	0.90194
FAHFA_22	526407	-0.996498	0.5781	2.834e-01	0.478239	0.7454	0.83492
EIC_62	269687	1.832104	1.0699	2.890e-01	0.112332	0.5505	0.94474
Eicosanoid_8-iso-PGA2 [M-H+Acetate]	222096	1.436620	0.8458	2.948e-01	0.531851	0.6370	0.76268
EIC_322	247451	1.072170	0.6307	2.948e-01	0.449171	0.5542	0.76268
VLCDCA_28	542127	1.246653	0.7367	2.974e-01	0.438086	0.8446	0.86234
Eicosanoid_13,14-dihydro-PGE1 [M-H]	189965	-1.865581	1.1096	2.989e-01	-1.356304	1.2546	0.68482
EIC_225	261389	-0.961965	0.5705	2.989e-01	-0.507277	0.6835	0.79144
EIC_83	344675	0.909817	0.5411	2.989e-01	0.849220	0.4624	0.42299
VLCDCA_1	532475	-1.214426	0.7222	2.989e-01	-0.733835	0.6184	0.64336
EIC_150	301803	0.892759	0.5318	2.992e-01	0.356775	0.6202	0.85717
Putative_Levofloxacin	34432	-0.717885	0.4288	3.008e-01	-0.189510	0.6548	0.90194
Eicosanoid_15S-HpETE [M-H]	413128	1.081471	0.6490	3.043e-01	-0.717478	0.6888	0.68554
FFA_Dihomo-g-linolenic† [M-H]	529407	-0.896132	0.5397	3.067e-01	0.961170	0.7113	0.60180
EIC_181	341438	1.047444	0.6389	3.176e-01	0.525806	0.7966	0.83207
EIC_26	441431	1.497201	0.9184	3.207e-01	0.681105	0.8427	0.76268
Putative_2-Hydroxypalmitic acid	521349	-0.936002	0.5734	3.207e-01	1.295983	0.7103	0.42299
EIC_14	387514	1.781892	1.0952	3.215e-01	-1.129155	0.8489	0.60518
EIC_166	350670	2.284963	1.4088	3.221e-01	0.099011	0.9424	0.97836
FFA_Pentadecanoic Acid† [M-H]	528566	-1.308985	0.8067	3.221e-01	-0.391962	0.9807	0.87856
FFA_Linoleic Acid† [M-H]	526174	-1.062944	0.6570	3.234e-01	0.384226	0.7773	0.86537
Eicosanoid_13(S) HOTrE [M-H+Acetate]	365619	1.295282	0.8020	3.237e-01	-0.290570	1.0151	0.90194
EIC_110	437709	1.476118	0.9151	3.237e-01	0.023782	1.0614	0.99725
EIC_232	222789	1.003559	0.6263	3.281e-01	0.619100	0.8765	0.80632
EIC_108	414045	1.254393	0.7841	3.285e-01	0.178981	0.9202	0.94966
Bile Acid_Glycoursodeoxycholic Acid [M-H]	169245	1.905059	1.1992	3.306e-01	-0.471547	0.7314	0.83492
EIC_41	183510	1.761760	1.1085	3.306e-01	-0.005882	0.9729	0.99725
EIC_178	254050	-5.893515	3.7078	3.306e-01	-2.343131	2.6173	0.74233
FAHFA_21	526086	-1.117469	0.7035	3.306e-01	0.255330	0.8095	0.90194
Putative_5a-Androstan-3a,17b-diol-17b-glucuronide	150234	-1.284859	0.8124	3.311e-01	-1.773244	1.0111	0.44991
Novel EIC_6	225577	-1.127269	0.7119	3.311e-01	-0.870503	0.6524	0.60365
Polar Molecule_allo-Tetrahydrocortisol [M-H+Acetate]	97322	-1.509072	0.9538	3.311e-01	-0.175747	0.6838	0.91706
EIC_194	407696	1.516600	0.9621	3.333e-01	0.478455	0.9467	0.86462
EIC_139	211121	1.745436	1.1162	3.404e-01	-0.517724	0.9685	0.86027
FFA_Adrenic Acid† [M-H]	528116	-0.918047	0.5882	3.410e-01	1.860236	0.8589	0.34143
Polar Molecule_CORTICOSTERONE [M-H+Acetate]	140738	-0.868179	0.5584	3.438e-01	-1.292745	0.5474	0.34143
Polar Molecule_GLYCOCHOLATE [M-H]	172623	3.924979	2.5356	3.470e-01	-1.244712	0.9688	0.62163
Novel EIC_14	448206	1.536299	0.9979	3.515e-01	0.371879	0.9426	0.87856
Eicosanoid_EPA [M-H+Acetate]	523035	0.875782	0.5735	3.587e-01	1.347375	0.5758	0.34143
EIC_79	252002	0.927688	0.6097	3.599e-01	1.554078	0.6920	0.34143
Polar Molecule_GLYCOCHOLATE [M-H]	170444	2.389150	1.5806	3.655e-01	-1.669672	0.6294	0.33768
FFA_Docosaenoic Acid† [M-H]	537429	1.315516	0.8741	3.687e-01	0.858407	0.8232	0.68554
Polar Molecule_CORTEXOLONE [M-H+Acetate]	159612	-0.813479	0.5445	3.729e-01	-0.993786	0.6390	0.53224
Eicosanoid_5,6-diHETrE [M-H]	386644	-1.284518	0.8613	3.729e-01	-2.007956	1.2664	0.51935
EIC_343	395749	1.502369	1.0056	3.729e-01	-2.708587	1.4384	0.41381
Eicosanoid_12S-HpETE [M-H]	430722	-1.158114	0.7762	3.729e-01	-2.728733	1.1769	0.34143
Putative_Androsterone glucuronide	172624	4.142853	2.7843	3.739e-01	-1.230284	1.0765	0.66744
EIC_91	329577	0.824389	0.5566	3.774e-01	0.512400	0.5279	0.70803
Putative_Levofloxacin	36118	1.022048	0.6984	3.889e-01	0.050862	0.7232	0.98503
EIC_55	297605	0.995431	0.6836	3.928e-01	0.528184	0.7979	0.83207
EIC_95	408174	-0.974636	0.6707	3.937e-01	0.066606	0.7283	0.98443
Putative_Levofloxacin	41558	-0.794977	0.5498	3.975e-01	-0.443857	0.7050	0.83772
Putative_1,3,5(10)-Estratrien-3,17b-diol 17-glucosiduronate	271516	-1.043389	0.7226	3.977e-01	-0.502267	0.9330	0.86027
EIC_322	266179	0.856320	0.5979	4.050e-01	-0.947348	0.6168	0.53718
FFA_Myristic Acid [M-H+Acetate]	522387	-1.225372	0.8647	4.151e-01	1.013638	0.8366	0.62163
Bile Acid_Glycoursodeoxycholic Acid [M-H]	166774	1.647352	1.1677	4.154e-01	-0.489812	0.6343	0.77930
EIC_257	249793	0.893143	0.6324	4.154e-01	-0.412168	0.8151	0.86462
EIC_135	324550	1.487859	1.0570	4.163e-01	0.450464	1.0584	0.87402
Eicosanoid_5,6-EET [M-H]	469222	-0.913340	0.6520	4.201e-01	0.634166	0.6741	0.71783
EIC_122	358178	1.040166	0.7448	4.219e-01	-1.530685	0.9721	0.52052
Eicosanoid_11-dehydro-TXB3 [M-H+Acetate]	146386	-0.607626	0.4426	4.392e-01	0.414941	0.5141	0.76268
Eicosanoid_11(12)-EpETE [M-H]	416960	0.871038	0.6359	4.401e-01	1.000918	0.4641	0.34143
Polar Molecule_CORTISONE [M-H+Acetate]	112455	-0.978712	0.7169	4.419e-01	0.463470	0.5857	0.77244
Eicosanoid_PGF1a [M-H]	167096	-0.707154	0.5201	4.419e-01	0.306146	0.5604	0.86027
Eicosanoid_LTF4 [M-H]	266556	-1.310072	0.9633	4.419e-01	0.634574	0.5992	0.68539
Putative_Monolinolenin (9c,12c,15c)	341483	0.694588	0.5100	4.419e-01	0.894747	0.5126	0.45437
Bile Acid_Chenodeoxycholic acid [M-H+Acetate]	329139	3.690892	2.7421	4.485e-01	0.876695	2.2935	0.88350
Eicosanoid_PGF1a [M-H]	171489	-0.956593	0.7190	4.578e-01	0.161466	0.6401	0.91981
Polar Molecule_PALMITOLEATE [M-H+Acetate]	520124	0.724823	0.5446	4.578e-01	-2.250074	1.3178	0.46650
Eicosanoid_7,17 dhDPA [M-H+Acetate]	289392	0.787243	0.5931	4.579e-01	0.348480	0.6174	0.86027
Eicosanoid_EPA [M-H]	523009	0.755949	0.5699	4.579e-01	1.008366	0.5959	0.46864
FFA_Heptadecaenoic Acid† [M-H+Acetate]	529424	-0.779715	0.5946	4.689e-01	0.153008	0.8817	0.95966
EIC_250	199108	-0.824202	0.6312	4.719e-01	-0.201518	0.5509	0.88968
FFA_Dihomo-g-linolenic† [M-H]	530664	-0.685555	0.5260	4.724e-01	0.941379	0.7307	0.62163
Eicosanoid_13,14-dihydro-15-keto-PGE1 [M-H]	215016	-3.165617	2.4440	4.758e-01	-0.855988	1.8039	0.86537
EIC_143	315302	0.729953	0.5629	4.758e-01	0.649445	0.5151	0.62163
EIC_185	397724	-1.093082	0.8463	4.773e-01	-0.791547	0.7131	0.68068
EIC_58	342155	2.295285	1.7808	4.779e-01	-2.635028	1.7070	0.53718
Polar Molecule_CORTISOL [M-H]	107951	1.474738	1.1480	4.799e-01	-0.040658	0.7912	0.99071
Eicosanoid_tetranor 12(R) HETE [M-H]	331464	0.977527	0.7662	4.842e-01	-0.198200	0.8581	0.93132
Putative_2-Hydroxypalmitic acid	518068	-0.952871	0.7462	4.842e-01	-0.350740	0.7650	0.87246
Putative_5a-Androstan-3a,17b-diol-17b-glucuronide	159009	-1.087573	0.8578	4.877e-01	-1.772391	0.9037	0.41381
FFA_Eicosenoic Acid [M-H]	531994	-1.011982	0.7971	4.877e-01	0.337268	0.8641	0.87856
Eicosanoid_DHA [M-H]	525743	-0.833629	0.6605	4.910e-01	1.032694	0.7998	0.62163
Polar Molecule_OLEOYL-GLYCEROL [M-H]	531324	-0.848258	0.6756	4.950e-01	-0.455743	0.7531	0.84831
Bile Acid_Glycochenodeoxycholic Acid [M-H]	247605	1.612181	1.2899	4.983e-01	-1.800344	0.8700	0.37441
Putative_4-[5-[[4-[5-[acetyl(hydroxy)amino]pentylamino]-4-oxobutanoyl]-hydroxyamino]pentylamino]-4-oxobutanoic acid	381293	-1.013465	0.8129	4.993e-01	0.301373	0.9875	0.90194
EIC_225	266128	-0.948434	0.7632	4.995e-01	0.839111	0.7941	0.68539
FFA_Myristic Acid [M-H]	522346	-1.055492	0.8506	4.995e-01	1.022281	0.8155	0.62163
FFA_Arachidic Acid† [M-H]	536380	1.543622	1.2440	4.995e-01	-0.846938	0.9919	0.76268
Putative_Dodecylbenzenesulfonic acid	399899	1.331594	1.0780	5.022e-01	-0.623428	1.1816	0.86027
Eicosanoid_12-oxoETE [M-H]	423400	-0.807511	0.6544	5.022e-01	0.666281	0.8861	0.78705
Eicosanoid_15-epi-PGA1 [M-H+Acetate]	253524	0.784764	0.6387	5.035e-01	0.845265	0.6208	0.59631
Putative_2a-Methyl-5a-androstan-3a-ol-17-one glucuronide	98088	0.919728	0.7481	5.035e-01	-0.290632	1.0118	0.90194
Bile Acid_Ursodeoxycholic acid [M-H+Acetate]	241332	1.312514	1.0761	5.097e-01	0.020190	0.7288	0.99725
Putative_N-oleoyl taurine	497820	-0.709796	0.5860	5.153e-01	0.018868	0.7292	0.99725
Eicosanoid_12S-HpEPE [M-H]	382329	0.717497	0.5942	5.158e-01	0.940750	0.6598	0.56201
VLCDCA_34	544601	-0.479075	0.3969	5.158e-01	-1.229838	0.5975	0.37441
VLCDCA_14	540389	1.783930	1.4861	5.200e-01	-1.943412	1.1878	0.49320
Polar Molecule_CORTISONE [M-H]	112369	-0.821399	0.6907	5.249e-01	0.557014	0.5269	0.68539
Putative_Chenodeoxycholic acid 24-acyl-b-D-glucuronide	232936	1.995793	1.6834	5.249e-01	-1.808034	0.6501	0.31878
Bile Acid_Glycochenodeoxycholic Acid [M-H]	251495	4.119896	3.4742	5.249e-01	-2.576311	1.2497	0.37441
Eicosanoid_14,15 LTD4 [M-H+Acetate]	258994	0.821747	0.6942	5.249e-01	1.671636	0.7116	0.34143
FFA_Nervonic Acid† [M-H]	539105	1.341691	1.1289	5.249e-01	-1.568999	0.6763	0.34143
Putative_7-Keto-3a,12-a-dihydroxycholanic acid	173610	1.040927	0.8864	5.305e-01	0.895742	0.8325	0.68482
EIC_178	244703	0.655665	0.5595	5.305e-01	-0.069562	0.6686	0.97836
EIC_144	256466	1.148231	0.9796	5.305e-01	0.318271	1.1348	0.90353
EIC_303	338181	0.894547	0.7647	5.307e-01	0.283743	0.6914	0.87856
Eicosanoid_13,14-dihydro-15-keto-tetranor-PGF1alpha [M-H+Acetate]	125021	0.827060	0.7119	5.320e-01	2.036508	0.7504	0.31878
Eicosanoid_5(S) HETrE [M-H]	501853	-0.585585	0.5044	5.320e-01	1.351279	0.6648	0.38616
FFA_a-linolenic Acid† [M-H]	527674	0.982981	0.8457	5.320e-01	0.891194	0.7568	0.65079
FFA_Eicosadienoic Acid† [M-H]	531992	-0.716375	0.6156	5.320e-01	0.990774	0.6587	0.55088
EIC_251	291460	3.904736	3.4083	5.423e-01	2.037180	3.4885	0.85554
VLCDCA_38	530224	-0.853336	0.7444	5.423e-01	-0.994578	0.8006	0.62163
VLCDCA_11	537154	-0.602108	0.5273	5.440e-01	-0.294242	0.5031	0.85554
EIC_250	186140	0.805524	0.7086	5.470e-01	0.196696	0.8997	0.93781
Polar Molecule_LUMICHROME [M-H]	54898	2.267557	2.0110	5.536e-01	-1.906750	0.8547	0.34143
Polar Molecule_GAMMA-LINOLENATE [M-H+Acetate]	518129	3.187755	2.8443	5.565e-01	2.140414	2.6336	0.76268
Eicosanoid_PGF1a [M-H]	164760	0.781096	0.7012	5.600e-01	-0.090179	0.6628	0.96630
Putative_3-Hydroxystanozolol glucuronide	281952	-1.082052	0.9720	5.600e-01	0.437307	0.9203	0.86537
Putative_1a-Methyl-5a-androstan-3a,17b-diol glucuronide	100107	-0.782804	0.7110	5.617e-01	-0.759026	0.7870	0.70803
Putative_3-Hydroxystanozolol glucuronide	271639	-1.087399	0.9843	5.617e-01	0.101593	1.1289	0.98443
Eicosanoid_15d PGJ2 [M-H]	364658	0.849824	0.7669	5.617e-01	2.514411	1.0410	0.34143
FAHFA_59	532202	-0.873405	0.7918	5.617e-01	-0.147259	1.0471	0.96582
VLCDCA_17	532515	-0.799242	0.7262	5.617e-01	-1.442659	0.7305	0.40841
VLCDCA_11	533173	-0.825868	0.7501	5.617e-01	0.090224	0.8428	0.97836
Eicosanoid_LTB4 ethanol amide [M-H+Acetate]	227844	0.920901	0.8383	5.619e-01	0.823353	1.0234	0.76268
FAHFA_48	528338	0.836643	0.7677	5.682e-01	1.891737	0.9694	0.41381
EIC_102	446037	-0.716233	0.6587	5.688e-01	0.328819	0.8389	0.87856
Bile Acid_Glycoursodeoxycholic Acid [M-H+Acetate]	181294	-0.900565	0.8298	5.690e-01	-0.342513	0.7100	0.86537
Endocannabinoid_Oleoyl Ethanolamide [M-H+Acetate]	522175	0.623628	0.5772	5.718e-01	0.011953	1.0398	0.99725
EIC_188	171462	-0.693790	0.6441	5.731e-01	-1.266612	0.5852	0.34143
FFA_Arachidic Acid† [M-H]	541489	0.816861	0.7675	5.801e-01	-0.628174	0.8617	0.79590
VLCDCA_14	541584	1.356655	1.2748	5.801e-01	-1.150674	0.9482	0.62163
Sterol_Estrone [M-H+Acetate]	202817	1.758180	1.6717	5.900e-01	0.229955	1.1009	0.94345
Putative_Tauroursodeoxycholic acid	181279	-1.012352	0.9645	5.903e-01	-1.901494	1.4112	0.60219
FFA_Palmitic Acid† [M-H+Acetate]	534889	0.903655	0.8668	5.952e-01	0.685528	1.0294	0.83207
EIC_358	269922	-0.714648	0.6910	5.970e-01	-0.607554	0.7913	0.77930
Docosanoid_7(S),17(S)-hydroxy DPA [M-H+Acetate]	270778	-0.875715	0.8487	5.970e-01	-1.928341	1.0520	0.42299
EIC_1	310243	-1.072737	1.0434	5.970e-01	-1.241137	1.6423	0.78688
Polar Molecule_ROSMARINATE [M-H]	46338	0.727458	0.7031	5.970e-01	0.754713	1.2149	0.84154
FFA_Palmitoleic Acid† [M-H+Acetate]	523988	1.213336	1.1790	5.970e-01	-1.383242	0.7784	0.44012
FFA_Pentadecanoic Acid† [M-H]	530326	-0.736690	0.7160	5.970e-01	0.370674	0.8336	0.87246
FFA_Behenic Acid† [M-H]	539090	0.842890	0.8125	5.970e-01	-0.151398	0.9509	0.96179
Eicosanoid_15k PGF2a [M-H+Acetate]	109511	0.619233	0.6097	6.003e-01	1.213056	0.7714	0.52052
EIC_224	298220	0.949753	0.9364	6.003e-01	-0.556803	1.1753	0.86537
Eicosanoid_15 oxoEDE [M-H]	479072	-0.574975	0.5641	6.003e-01	-0.491168	0.5835	0.76268
FFA_Heptadecaenoic Acid† [M-H+Acetate]	532124	0.929876	0.9158	6.003e-01	1.651652	1.1322	0.55252
VLCDCA_44	544161	0.707436	0.6934	6.003e-01	-0.105011	0.7762	0.96630
Novel EIC_3	381111	-0.735189	0.7274	6.017e-01	-0.235936	0.6985	0.89783
EIC_229	184258	0.687700	0.6873	6.040e-01	0.886601	0.5436	0.49320
EIC_263	208281	0.475020	0.4729	6.040e-01	-0.211479	0.4678	0.87246
FFA_Docosatrienoic Acid† [M-H]	532415	-0.635104	0.6337	6.040e-01	1.014916	0.7733	0.62163
FFA_Docosaenoic Acid† [M-H+Acetate]	535281	1.069349	1.0698	6.040e-01	0.614447	1.1307	0.86027
Eicosanoid_13,14-dihydro-15-keto-tetranor-PGF1alpha [M-H+Acetate]	129125	0.751180	0.7600	6.110e-01	2.927838	0.7273	0.04082
EIC_88	373969	0.995544	1.0107	6.110e-01	1.003415	0.9383	0.68539
Eicosanoid_15S-HpETE [M-H]	407687	0.837359	0.8501	6.110e-01	1.108704	0.8255	0.60219
FFA_Arachidic Acid† [M-H+Acetate]	534912	0.942926	0.9544	6.110e-01	-0.154591	0.9080	0.95985
Eicosanoid_12epi LTB4 [M-H+Acetate]	285289	0.811437	0.8291	6.137e-01	0.338276	0.7500	0.87246
FFA_Myristic Acid [M-H]	527646	0.681593	0.6960	6.137e-01	0.002419	0.7012	0.99725
Eicosanoid_11-HETE [M-H+Acetate]	423143	0.675498	0.6929	6.151e-01	-1.368456	0.7505	0.42299
Putative_N-Oleoyl-L-serine	517674	0.611836	0.6283	6.151e-01	0.744863	0.6801	0.68482
EIC_7	401671	-0.865178	0.8946	6.192e-01	1.387298	1.0089	0.59019
Novel EIC_1	405831	0.588309	0.6091	6.192e-01	0.933171	0.7654	0.62163
FFA_Heptadecaenoic Acid† [M-H]	531845	-0.645304	0.6693	6.192e-01	-0.059778	0.8854	0.98594
FAHFA_11	521853	-0.945119	0.9858	6.226e-01	0.242364	1.0407	0.93112
FFA_Tricosenoic Acid [M-H+Acetate]	536191	0.609600	0.6444	6.329e-01	0.405352	0.6580	0.84434
Novel EIC_33	460414	-0.820210	0.8719	6.362e-01	-0.196412	0.7612	0.91706
Novel EIC_6	221883	-0.572521	0.6150	6.435e-01	-1.875931	1.2712	0.55252
VLCDCA_8	534206	-0.616785	0.6636	6.435e-01	-1.886644	0.8358	0.34143
Putative_1-Stearoyl-2-hydroxy-sn-glycero-3-phosphoethanolamine	525188	0.623324	0.6721	6.439e-01	0.593622	0.7599	0.77747
Endocannabinoid_Arachidonoyl Ethanolamide [M-H+Acetate]	479677	-0.490236	0.5317	6.473e-01	1.125900	0.7205	0.52764
VLCDCA_23	534469	-0.609838	0.6680	6.543e-01	-1.838129	0.7284	0.34143
EIC_189	389030	-0.559306	0.6195	6.623e-01	-0.014507	0.8924	0.99725
Putative_Oxymorphone 3-b-D-glucuronide	90626	-0.620533	0.6889	6.626e-01	0.235660	0.8301	0.90194
EIC_106	378136	-0.978108	1.0880	6.627e-01	-1.924019	1.2784	0.55088
FFA_Eicosenoic Acid [M-H+Acetate]	534432	0.669329	0.7461	6.629e-01	-0.995334	0.8182	0.62163
FAHFA_14	522914	-0.771388	0.8681	6.676e-01	0.654704	0.6123	0.68539
FFA_Linoleic Acid† [M-H]	532109	-0.587011	0.6750	6.843e-01	0.473175	0.9269	0.86325
Putative_5a-Androstan-17b-ol-3-one glucosiduronate	201784	-1.171264	1.3510	6.852e-01	-0.570279	1.3698	0.87727
Eicosanoid_Arachidonic Acid [M-H]	525365	-0.622550	0.7256	6.922e-01	0.380550	0.6510	0.85554
Endocannabinoid_N-oleoyl Dopamine [M-H]	528189	-0.763768	0.8976	6.975e-01	0.296529	0.9602	0.90194
Docosanoid_7,8-DiHDPA [M-H]	364273	-0.587603	0.6989	7.058e-01	0.349325	0.6222	0.86027
VLCDCA_23	533191	-0.713025	0.8573	7.130e-01	0.052320	0.7055	0.98471
FAHFA_43	529622	-0.529540	0.6390	7.142e-01	0.528643	0.9136	0.85554
Putative_Hydrocortisone	107173	0.481168	0.5920	7.230e-01	-1.139403	0.5522	0.37441
Novel EIC_13	423715	-0.604594	0.7411	7.230e-01	-0.585491	0.9265	0.83772
FFA_Linoleic Acid† [M-H+Acetate]	528408	0.798992	0.9791	7.230e-01	2.765924	1.2341	0.34143
Polar Molecule_LUMICHROME [M-H]	57910	1.895486	2.3379	7.233e-01	-1.834380	1.5788	0.66048
EIC_147	293675	1.327335	1.6471	7.265e-01	0.688759	1.3912	0.86537
Eicosanoid_17,18-DiHETE [M-H+Acetate]	263807	0.523445	0.6517	7.274e-01	0.931805	0.6536	0.56201
FFA_a-linolenic Acid† [M-H]	521670	-0.636962	0.7951	7.277e-01	0.817620	0.8898	0.73335
EIC_178	245971	-1.396637	1.7504	7.292e-01	-1.079646	1.7797	0.84831
Eicosanoid_PDX [M-H+Acetate]	282516	0.663505	0.8348	7.305e-01	0.557778	0.8959	0.84154
Eicosanoid_11-dehydro-2,3-dinor-TXB2 [M-H+Acetate]	128452	0.539145	0.6838	7.346e-01	-0.556944	0.6785	0.76268
EIC_71	305288	0.972066	1.2431	7.346e-01	-2.525279	1.3127	0.41381
EIC_15	412685	-0.812801	1.0366	7.346e-01	-0.256466	0.8825	0.90194
EIC_10	440807	2.675524	3.4037	7.346e-01	-0.051060	1.1996	0.99234
FFA_Oleic Acid† [M-H]	535786	-0.558871	0.7143	7.346e-01	0.898483	0.8521	0.68539
Eicosanoid_DHA [M-H]	523275	-0.691090	0.8888	7.355e-01	0.561420	1.8728	0.90194
Eicosanoid_Arachidonic Acid [M-H+Acetate]	531873	0.765790	0.9907	7.367e-01	2.221124	0.9681	0.34143
FFA_Oleic Acid† [M-H+Acetate]	532675	0.725031	0.9361	7.367e-01	0.251868	1.1318	0.93583
EIC_209	228440	-0.408485	0.5297	7.367e-01	-0.582564	0.5709	0.69259
Novel EIC_44	186232	-0.537940	0.7030	7.392e-01	-1.421653	0.8391	0.46864
FAHFA_8	518912	-0.578024	0.7544	7.392e-01	0.985263	0.9513	0.68554
Endocannabinoid_N-arachidonoyl Dopamine [M-H+Acetate]	518573	-0.603265	0.7917	7.407e-01	0.276786	0.8086	0.89783
Novel EIC_35	136210	0.390425	0.5136	7.408e-01	-0.844168	0.8190	0.68667
Endocannabinoid_D-erythro-Sphingosine C-18 [M-H+Acetate]	518988	-0.546398	0.7270	7.449e-01	0.029483	1.0013	0.99725
Putative_Heneicosapentaenoic acid	524788	-0.819453	1.0906	7.449e-01	2.051180	1.1866	0.45507
VLCDCA_7	542382	0.612941	0.8163	7.449e-01	0.404069	0.9424	0.87402
FAHFA_57	531915	1.323880	1.7676	7.451e-01	3.045347	1.8649	0.49320
Eicosanoid_11-dehydro-2,3-dinor-TXB2 [M-H+Acetate]	143490	-0.675959	0.9051	7.455e-01	0.302822	0.8784	0.89783
Eicosanoid_7,17 dhDPA [M-H+Acetate]	286064	0.369718	0.4984	7.487e-01	-0.502117	0.4612	0.68482
Bile Acid_Lithocholic Acid [M-H]	442558	0.661757	0.8969	7.510e-01	-0.795663	1.0745	0.79144
Eicosanoid_EPA [M-H]	518723	-0.490556	0.6678	7.525e-01	0.694829	0.7567	0.73335
EIC_83	335777	0.739156	1.0166	7.562e-01	-0.391789	1.1558	0.89783
VLCDCA_6	532891	-0.824724	1.1365	7.562e-01	-0.828080	1.0257	0.76268
VLCDCA_8	532895	-0.456083	0.6263	7.562e-01	-1.463855	0.5985	0.34143
Putative_Androstan-3-ol-17-one 3-glucuronide	167264	-0.475431	0.6625	7.567e-01	-2.282075	0.8314	0.31878
Bile Acid_Lithocholic Acid [M-H+Acetate]	441749	-0.559968	0.7781	7.567e-01	-1.314508	0.8882	0.55252
Putative_Abietic acid	518727	-0.470903	0.6547	7.567e-01	0.896540	0.7758	0.66488
Polar Molecule_NERVONATE [M-H]	537448	-0.624512	0.8708	7.567e-01	1.141102	1.0436	0.68482
EIC_31	411585	-0.504760	0.7115	7.605e-01	-0.558943	0.8682	0.83492
VLCDCA_17	534730	-0.535056	0.7536	7.605e-01	-0.237900	1.0161	0.93112
Eicosanoid_14,15 LTC4 [M-H]	264928	0.745211	1.0702	7.704e-01	1.612822	1.4950	0.68482
EIC_104	401285	0.658838	0.9473	7.704e-01	0.280261	0.6729	0.87727
FFA_Palmitic Acid† [M-H+Acetate]	531306	-0.539402	0.7770	7.704e-01	0.525283	0.9069	0.85554
Polar Molecule_CORTEXOLONE [M-H]	153590	-0.448704	0.6540	7.768e-01	-1.650405	0.8268	0.40192
Eicosanoid_15-epi-PGA1 [M-H+Acetate]	248240	-0.482160	0.7083	7.787e-01	0.799247	0.9479	0.76268
Eicosanoid_18(+/-)-HETE [M-H+Acetate]	374735	-0.507762	0.7456	7.787e-01	-2.272312	2.0276	0.67416
EIC_105	382736	0.448227	0.6640	7.793e-01	0.813291	0.6234	0.62163
Endocannabinoid_N-arachidonoyl Dopamine [M-H]	515028	-0.549155	0.8096	7.793e-01	0.955620	0.9036	0.68539
Eicosanoid_13-oxoODE [M-H+Acetate]	408537	-0.572977	0.8548	7.806e-01	0.094142	0.9286	0.97917
FFA_Eicosatrienoic Acid† [M-H+Acetate]	534431	-0.378418	0.5643	7.806e-01	0.684367	0.9596	0.80298
VLCDCA_40	537628	0.549910	0.8330	7.889e-01	-0.877353	0.8237	0.68539
Putative_1-Palmitoyl-2-hydroxy-sn-glycero-3-phosphoethanolamine	444474	0.414786	0.6338	7.930e-01	-0.664398	0.5351	0.62163
Eicosanoid_20cooh AA [M-H]	356342	-0.399109	0.6164	7.982e-01	-0.501398	0.5757	0.75396
EIC_185	398537	-0.484334	0.7526	8.004e-01	-1.487196	0.7017	0.36558
EIC_72	439727	0.567314	0.8965	8.039e-01	-0.418431	0.9449	0.87246
FFA_Stearidonic Acid [M-H+Acetate]	487076	0.517215	0.8159	8.039e-01	-1.953737	1.7282	0.67276
FAHFA_56	530580	0.668030	1.0521	8.039e-01	-1.506159	0.8002	0.41381
Polar Molecule_TRICOSANOATE [M-H]	540604	0.400023	0.6335	8.039e-01	-1.454696	0.5688	0.34143
VLCDCA_42	544630	0.396350	0.6228	8.039e-01	-0.783331	0.7195	0.68482
Eicosanoid_Adrenic Acid [M-H]	532126	-0.479310	0.7671	8.071e-01	1.005936	0.7893	0.62163
Docosanoid_7(S),17(S)-hydroxy DPA [M-H+Acetate]	275325	-0.382843	0.6153	8.080e-01	0.693416	0.7033	0.70392
FFA_Docosadienoic Acid† [M-H]	539086	-1.117701	1.8055	8.095e-01	-2.646929	1.8464	0.56201
Novel EIC_6	234484	0.357130	0.5804	8.096e-01	0.859546	0.5914	0.55252
EIC_109	403246	-2.114491	3.4448	8.096e-01	5.608905	5.2523	0.68539
Bile Acid_Lithocholic Acid [M-H]	441724	0.482666	0.7839	8.096e-01	-0.294956	0.8084	0.88968
Polar Molecule_LIOTHYRONINE [M-H]	116699	0.449377	0.7485	8.185e-01	0.823355	0.6774	0.62163
EIC_138	191819	0.868871	1.4488	8.185e-01	-0.189837	1.3033	0.96470
Sterol_11-keto-testosterone [M-H+Acetate]	157340	-0.397222	0.6721	8.221e-01	-0.055336	0.7378	0.98471
Bile Acid_Ursodeoxycholic acid [M-H]	245404	-0.727763	1.2287	8.221e-01	-2.218339	1.5210	0.55252
Endocannabinoid_N-oleoyl Dopamine [M-H]	529004	0.469354	0.7919	8.221e-01	0.847303	0.9286	0.73361
Putative_1a-Methyl-5a-androstan-3a,17b-diol glucuronide	108971	0.436956	0.7512	8.265e-01	-0.463495	0.9457	0.86537
EIC_205	221256	0.461387	0.7991	8.265e-01	-0.247986	0.8645	0.90194
Putative_11a-Hydroxyprogesterone b-D-glucuronide	269360	0.511115	0.8870	8.265e-01	-3.110742	1.5208	0.38104
Eicosanoid_18(+/-)-HETE [M-H+Acetate]	377399	-0.390861	0.6773	8.265e-01	0.097756	0.7020	0.96582
VLCDCA_42	540422	0.460569	0.7886	8.265e-01	-1.022645	0.6950	0.55252
Polar Molecule_ELAIDATE [M-H]	527169	1.995873	3.4757	8.266e-01	4.664110	5.6985	0.76268
Endocannabinoid_Stearoyl Ethanolamide [M-H+Acetate]	530121	-0.449400	0.7846	8.266e-01	-1.095699	0.6928	0.51935
Eicosanoid_13,14-dihydro-PGE1 [M-H]	195187	-0.418562	0.7416	8.286e-01	1.049263	0.7002	0.55252
Putative_a-Hyodeoxycholic acid methyl ester	343493	0.305568	0.5467	8.286e-01	-0.705348	0.7279	0.70803
EIC_111	443405	-0.459896	0.8326	8.286e-01	1.017918	0.8516	0.63658
FFA_a-linolenic Acid† [M-H]	523928	-0.308382	0.5532	8.286e-01	0.836773	0.8268	0.69562
FAHFA_39	528335	-0.357222	0.6469	8.286e-01	2.365094	1.0191	0.34143
FFA_Palmitoleic Acid† [M-H+Acetate]	529152	-0.530154	0.9455	8.286e-01	-1.098881	1.0663	0.68667
FAHFA_29	529339	0.292319	0.5181	8.286e-01	-0.449954	0.8555	0.86027
FAHFA_58	531777	0.897950	1.6262	8.286e-01	2.660786	1.8848	0.57096
FAHFA_69	542169	0.343397	0.6171	8.286e-01	-0.477808	0.6893	0.81249
VLCDCA_44	547731	0.362696	0.6447	8.286e-01	0.680452	0.7646	0.74304
Polar Molecule_LUMICHROME [M-H]	63608	1.188139	2.1055	8.286e-01	-1.717137	1.8013	0.71341
Putative_11a-Hydroxyprogesterone b-D-glucuronide	282628	-0.434595	0.7914	8.295e-01	-1.748744	1.1687	0.55252
FAHFA_42	531450	-0.360627	0.6583	8.295e-01	-0.069353	0.8760	0.98471
EIC_250	191117	-0.302769	0.5664	8.409e-01	0.158551	0.6497	0.92564
Polar Molecule_Tetrahydrocortisol [M-H+Acetate]	138195	0.363557	0.7229	8.413e-01	-0.645683	0.7968	0.76268
EIC_178	251262	-1.607277	3.0215	8.413e-01	0.887880	2.2747	0.87856
Novel EIC_18	420737	-0.304513	0.5838	8.413e-01	0.324886	0.6771	0.86537
Eicosanoid_14,15-EET [M-H+Acetate]	444412	-0.373238	0.7269	8.413e-01	-2.146726	1.5277	0.57508
FFA_Myristic Acid [M-H+Acetate]	524395	0.423813	0.8200	8.413e-01	1.394876	1.1480	0.62163
Putative_1-Arachidoyl-2-hydroxy-sn-glycero-3-phosphocholine	525258	0.351992	0.6708	8.413e-01	0.416235	1.0512	0.87856
Polar Molecule_OLEOYL-GLYCEROL [M-H+Acetate]	527254	-0.508666	0.9669	8.413e-01	0.442203	1.0824	0.87856
FAHFA_27	528052	-0.268538	0.5290	8.413e-01	0.817900	0.9609	0.76268
Eicosanoid_Arachidonic Acid [M-H]	531480	0.376935	0.7249	8.413e-01	0.983782	0.7051	0.57720
VLCDCA_1	531896	-0.546752	1.0824	8.413e-01	0.870444	1.1354	0.77930
FFA_Eicosenoic Acid [M-H]	534395	-0.409116	0.8020	8.413e-01	0.611492	0.7872	0.77825
VLCDCA_45	534494	-0.499744	0.9552	8.413e-01	-1.338882	1.0756	0.62163
FFA_Heptadecanoic Acid† [M-H+Acetate]	534900	0.434747	0.8465	8.413e-01	0.872331	1.0754	0.76268
VLCDCA_1	534965	0.585669	1.1600	8.413e-01	-0.316733	1.1485	0.90624
VLCDCA_12	535370	-0.362829	0.7224	8.413e-01	-0.014689	1.1446	0.99725
VLCDCA_26	535393	-0.377406	0.7372	8.413e-01	-1.043650	0.6466	0.50725
FFA_Eicosenoic Acid [M-H]	539066	-0.413033	0.7816	8.413e-01	0.910535	0.6727	0.60180
EIC_82	445680	-0.291128	0.5921	8.483e-01	0.580506	0.6329	0.73335
VLCDCA_15	533973	0.419836	0.8532	8.483e-01	-0.445504	0.8139	0.86027
EIC_314	153636	-0.317576	0.6617	8.512e-01	-2.577032	2.7136	0.71341
Polar Molecule_CORTEXOLONE [M-H+Acetate]	155822	0.431388	0.9012	8.512e-01	-1.324377	0.8225	0.50793
EIC_29	354579	0.544622	1.1295	8.512e-01	0.060456	0.8390	0.98503
Putative_Decylbenzenesulfonic acid	418979	0.725438	1.5071	8.512e-01	-1.610348	1.0986	0.55252
FFA_Linoleic Acid† [M-H+Acetate]	526555	0.794829	1.6489	8.512e-01	0.010069	1.7120	0.99725
FFA_Heptadecanoic Acid† [M-H+Acetate]	534128	0.283258	0.5829	8.512e-01	0.731763	1.0191	0.80161
Novel EIC_35	134247	-0.242273	0.5224	8.581e-01	-1.305652	0.8506	0.53718
EIC_91	326677	-0.333366	0.7129	8.581e-01	-1.551451	0.7825	0.40574
Eicosanoid_13(S) HOTrE(y) [M-H+Acetate]	377311	0.375583	0.8110	8.581e-01	0.502456	1.1198	0.87246
Putative_1-Palmitoyl-2-hydroxy-sn-glycero-3-phosphoethanolamine	452730	-0.589561	1.2662	8.581e-01	-1.279760	1.1206	0.66744
FAHFA_18	522272	-0.297945	0.6389	8.581e-01	1.663020	1.1347	0.55252
FAHFA_12	523559	0.454655	0.9860	8.583e-01	1.743999	1.0368	0.47298
FFA_Pentadecanoic Acid† [M-H]	527657	0.360262	0.7839	8.583e-01	-0.153225	0.8499	0.95966
Polar Molecule_BIOTIN [M-H]	31198	0.282689	0.6232	8.592e-01	-0.303179	0.8897	0.89783
EIC_6	357386	-0.293482	0.6454	8.592e-01	-0.276717	0.6243	0.87246
Eicosanoid_11(12)-EpETE [M-H+Acetate]	421573	-0.360409	0.8014	8.614e-01	-0.135535	0.8848	0.96470
EIC_135	316724	0.321396	0.7208	8.634e-01	-0.925635	1.1109	0.76268
Putative_6-((E)-2-((1R,2S,3R,5S)-3,5-Dihydroxy-2-((Z)-oct-2-enyl)cyclopentyl)vinyl)tetrahydro-2H-pyran-2-one	174904	-0.327505	0.7402	8.651e-01	1.169796	0.6908	0.46864
Eicosanoid_15 oxoEDE [M-H+Acetate]	474392	-0.350673	0.7986	8.651e-01	-0.046868	0.9043	0.99071
Putative_2-Hydroxypalmitic acid	523924	-0.443662	1.0085	8.651e-01	0.393801	1.0452	0.88584
Putative_7a,17a-Dimethyl-5b-androstane-3a,17b-diol glucuronide	210760	-0.607106	1.3908	8.653e-01	-1.497502	2.0992	0.80298
Polar Molecule_CORTISOL [M-H+Acetate]	100025	0.245611	0.5675	8.664e-01	-0.425774	0.5305	0.76268
EIC_158	238213	-3.495788	8.2612	8.696e-01	3.279676	5.6220	0.85554
Eicosanoid_14,15-diHETrE [M-H+Acetate]	323938	0.677615	1.6095	8.696e-01	-0.848093	1.6554	0.86325
EIC_189	392686	0.296029	0.7035	8.696e-01	0.884250	0.8161	0.68482
Polar Molecule_OLEOYL-GLYCEROL [M-H+Acetate]	528185	-0.476944	1.1369	8.696e-01	0.794388	1.1832	0.83045
FFA_Linoleic Acid† [M-H]	528366	-0.245983	0.5849	8.696e-01	1.074089	0.5922	0.42543
FFA_Eicosadienoic Acid† [M-H+Acetate]	531329	0.686021	1.6174	8.696e-01	2.985867	1.6473	0.42543
EIC_122	368273	0.292979	0.7034	8.708e-01	-1.185704	0.8822	0.60219
Polar Molecule_ELAIDATE [M-H+Acetate]	527688	0.285509	0.6912	8.717e-01	0.584399	1.0796	0.86027
FFA_Palmitic Acid† [M-H]	533569	-0.215453	0.5226	8.717e-01	0.766343	0.9102	0.76268
EIC_333	191164	-0.313652	0.7768	8.724e-01	0.812081	0.8389	0.70803
EIC_146	245286	-0.494674	1.2223	8.724e-01	0.004007	0.9287	0.99725
FFA_Oleic Acid† [M-H+Acetate]	531868	0.326542	0.8097	8.724e-01	1.571666	0.8356	0.41381
VLCDCA_23	535937	-0.283722	0.6955	8.724e-01	-0.698428	0.7094	0.70392
EIC_192	402518	0.295772	0.7446	8.765e-01	0.708094	0.7047	0.70028
Putative_Codeine-6-b-D-glucuronide	119896	0.437837	1.1192	8.784e-01	0.386526	1.1540	0.89783
EIC_205	215007	0.205880	0.5258	8.784e-01	-0.410253	0.6303	0.83492
Eicosanoid_17,18-DiHETE [M-H+Acetate]	268636	-0.267810	0.6863	8.784e-01	0.852450	0.7321	0.66048
EIC_166	353621	0.395576	1.0267	8.815e-01	0.293059	0.7832	0.88584
EIC_158	235415	-2.181931	5.7607	8.845e-01	0.270011	4.7881	0.98943
Docosanoid_7(S),17(S)-hydroxy DPA [M-H+Acetate]	283207	0.320968	0.8437	8.845e-01	0.502028	0.9447	0.86027
Polar Molecule_CORTISONE [M-H+Acetate]	118213	0.218639	0.5815	8.855e-01	0.069087	0.8253	0.98471
Eicosanoid_14,15 LTE4 [M-H]	233290	-0.245172	0.6615	8.874e-01	1.158148	0.6794	0.46650
VLCDCA_1	533929	0.250485	0.6751	8.874e-01	-1.454201	0.8255	0.44597
Novel EIC_6	229056	-0.212925	0.5924	8.929e-01	-1.227252	0.6708	0.42299
EIC_182	323049	0.397480	1.1189	8.929e-01	-0.051608	1.0798	0.99128
Eicosanoid_19(R)-HETE [M-H]	362815	-0.258704	0.7342	8.929e-01	-0.086830	0.7917	0.97836
Eicosanoid_15(S) HEPE [M-H+Acetate]	371287	-0.314253	0.8904	8.929e-01	0.954639	1.2780	0.78854
FFA_Stearidonic Acid [M-H]	488156	-0.669823	1.8622	8.929e-01	-0.481898	1.8195	0.91302
Polar Molecule_MYRISTATE [M-H]	519152	0.266762	0.7590	8.929e-01	-0.515043	0.7944	0.83492
FAHFA_48	529646	-0.239505	0.6808	8.929e-01	0.877804	0.9223	0.71341
FFA_Arachidic Acid† [M-H+Acetate]	537842	0.258617	0.7337	8.929e-01	0.480907	0.8304	0.85554
Eicosanoid_Arachidonic Acid [M-H]	527450	-0.216117	0.6189	8.934e-01	1.759519	0.7274	0.34143
EIC_224	295140	0.181180	0.5322	8.943e-01	-1.221499	0.7360	0.48433
Putative_4-[5-[[4-[5-[acetyl(hydroxy)amino]pentylamino]-4-oxobutanoyl]-hydroxyamino]pentylamino]-4-oxobutanoic acid	390962	-0.236075	0.6873	8.943e-01	0.329336	0.8889	0.88755
FAHFA_4	509868	-0.495657	1.4576	8.943e-01	-1.236449	1.4726	0.76268
FFA_Myristic Acid [M-H]	524668	0.243575	0.7144	8.943e-01	0.950039	0.9005	0.68539
Putative_2a-Methyl-5a-androstan-3a-ol-17-one glucuronide	92507	-0.356574	1.0455	8.943e-01	-0.997214	0.7969	0.62163
Sterol_11-Deoxycorticosterone [M-H+Acetate]	228510	0.224727	0.6701	8.961e-01	0.783891	0.7718	0.69396
EIC_158	232601	0.275177	0.8220	8.961e-01	-0.484515	1.1121	0.87402
Bile Acid_Ursodeoxycholic acid [M-H+Acetate]	232137	0.303248	0.9134	8.971e-01	-0.276502	0.8301	0.89783
Eicosanoid_PGF1a [M-H]	174973	-0.249715	0.7664	8.986e-01	1.500493	0.6960	0.34143
Docosanoid_MCTR2 [M-H]	208505	0.297397	0.9124	8.986e-01	1.481123	0.7855	0.41381
EIC_251	297013	0.358705	1.1023	8.986e-01	0.422160	0.9849	0.87402
EIC_338	297072	0.219864	0.6938	9.049e-01	2.093188	0.7704	0.31878
EIC_122	361269	-0.176370	0.5662	9.083e-01	-0.684382	0.6145	0.67902
FFA_Docosadienoic Acid† [M-H]	534554	0.284138	0.9196	9.091e-01	1.401951	0.9640	0.55252
Endocannabinoid_2-Arachidonyl glycerol ether [M-H+Acetate]	526318	-0.332234	1.0829	9.095e-01	1.078963	1.0018	0.68482
EIC_138	201561	0.287223	0.9423	9.098e-01	-0.426628	0.9241	0.87244
VLCDCA_6	535897	0.229441	0.7613	9.115e-01	-0.590936	0.8510	0.81249
FFA_Oleic Acid† [M-H]	531847	0.249816	0.8393	9.133e-01	1.482629	0.8117	0.42299
VLCDCA_17	532189	-0.340772	1.1571	9.147e-01	-0.418840	0.8599	0.86537
Eicosanoid_15-epi-PGA1 [M-H+Acetate]	260175	-0.281550	1.0027	9.230e-01	0.561146	0.7795	0.80157
Putative_1-Stearoyl-2-hydroxy-sn-glycero-3-phosphoethanolamine	519992	0.237838	0.8409	9.230e-01	-2.850418	1.5327	0.42286
Polar Molecule_STEARATE [M-H]	530351	-0.191864	0.6845	9.230e-01	-0.118041	0.7062	0.95985
Eicosanoid_11b PGE2 [M-H]	104963	0.218954	0.7885	9.238e-01	-0.158519	0.5356	0.90194
Putative_4-Androsten-17b-ol-3-one glucosiduronate	153131	-0.301941	1.1068	9.238e-01	-0.704808	1.0056	0.81013
FAHFA_28	527378	-0.140388	0.5127	9.238e-01	1.963335	0.8239	0.34143
FFA_Heptadecanoic Acid† [M-H]	532380	-0.175245	0.6361	9.238e-01	0.464343	0.8614	0.86027
Bile Acid_Glycoursodeoxycholic Acid [M-H]	173155	0.439168	1.6694	9.250e-01	-1.337087	1.5075	0.74304
Polar Molecule_PALMITOLEATE [M-H]	521338	-0.204046	0.7778	9.250e-01	1.059824	0.8176	0.62163
FFA_Oleic Acid† [M-H]	530347	-0.184557	0.7061	9.250e-01	1.688282	0.7363	0.34143
FFA_Heptadecaenoic Acid† [M-H+Acetate]	532672	0.193832	0.7320	9.250e-01	0.970879	1.2070	0.76268
FFA_Arachidic Acid† [M-H]	535084	0.256478	0.9571	9.250e-01	-0.551689	0.9792	0.86027
Polar Molecule_allo-Tetrahydrocortisol [M-H+Acetate]	84478	0.184343	0.6935	9.250e-01	-0.838031	0.7480	0.67416
Putative_4-Androsten-17b-ol-3-one glucosiduronate	158439	-0.278379	1.1438	9.256e-01	0.337135	0.7598	0.87246
Putative_7a,17a-Dimethyl-5b-androstane-3a,17b-diol glucuronide	203097	-0.542635	2.2873	9.256e-01	-1.101497	2.4609	0.87246
EIC_356	208342	-0.194072	0.7938	9.256e-01	-0.381781	0.7187	0.86027
EIC_358	264609	-0.139210	0.6349	9.256e-01	-0.107639	0.7298	0.96470
EIC_4	345300	-0.109460	0.4860	9.256e-01	0.042468	0.8990	0.99128
EIC_185	397318	0.321609	1.3937	9.256e-01	-1.565080	0.7133	0.34143
Eicosanoid_13-oxoODE [M-H+Acetate]	402537	0.120839	0.5454	9.256e-01	0.041992	0.7427	0.98943
EIC_191	412743	0.150079	0.6812	9.256e-01	0.571186	0.8711	0.83478
EIC_24	422518	0.212023	0.8639	9.256e-01	-0.716625	0.9300	0.77930
EIC_111	454288	-0.177064	0.6978	9.256e-01	1.088896	0.7504	0.55252
EIC_183	455310	-0.184065	0.7122	9.256e-01	0.795775	0.7942	0.70028
FAHFA_12	520493	-0.117544	0.4925	9.256e-01	1.278487	0.6155	0.37441
FFA_Myristic Acid [M-H]	520512	0.135151	0.5831	9.256e-01	-2.739846	1.5436	0.44012
FAHFA_11	520688	0.160445	0.7243	9.256e-01	0.876024	0.6939	0.62163
FAHFA_13	525986	0.220419	0.9057	9.256e-01	1.098647	0.7844	0.57713
FAHFA_37	528301	0.152505	0.6020	9.256e-01	1.640852	0.7083	0.34143
FFA_Palmitic Acid† [M-H+Acetate]	531996	0.142264	0.6294	9.256e-01	1.057994	0.8696	0.62163
FFA_Stearic Acid† [M-H+Acetate]	533106	0.187481	0.8096	9.256e-01	-0.161630	0.9286	0.95966
VLCDCA_6	534200	-0.173684	0.7745	9.256e-01	-0.809528	0.8634	0.71783
VLCDCA_8	537536	-0.246124	1.0768	9.256e-01	-0.917170	1.1326	0.76268
VLCDCA_34	537603	-0.161655	0.7182	9.256e-01	-0.891932	0.7083	0.62163
VLCDCA_41	540711	0.223235	0.9765	9.256e-01	-1.129343	0.8999	0.62163
FAHFA_69	541292	0.138802	0.5477	9.256e-01	-0.685682	0.6002	0.66744
EIC_271	297019	-0.164801	0.7649	9.265e-01	0.457376	0.8651	0.86027
Docosanoid_10,11-DiHDPA [M-H+Acetate]	346852	-0.164038	0.7746	9.265e-01	-1.358964	0.6697	0.38616
EIC_87	390659	-0.160196	0.7513	9.265e-01	0.098914	0.8201	0.97430
VLCDCA_40	540421	0.201231	0.9511	9.265e-01	-2.297360	1.4317	0.51020
Putative_Hydrocortisone 21-hemisuccinate	111837	0.173755	0.8573	9.291e-01	-0.324058	0.6856	0.86537
Eicosanoid_13,14-dihydro-15-keto-tetranor-PGD2 [M-H+Acetate]	125018	0.153540	0.7529	9.291e-01	0.448167	0.7505	0.85286
EIC_122	365097	0.205111	1.0156	9.291e-01	-2.537877	0.9528	0.33768
FFA_Arachidic Acid† [M-H]	537803	0.175724	0.8619	9.291e-01	0.447521	0.9026	0.86537
EIC_87	387542	0.122219	0.6223	9.311e-01	-0.236146	0.6888	0.89783
FFA_Stearic Acid† [M-H]	533317	0.172052	0.8762	9.311e-01	0.880829	0.9932	0.74304
Eicosanoid_8-iso-15-keto-PGE2 [M-H+Acetate]	178102	0.126968	0.6825	9.383e-01	0.684544	0.5322	0.62163
Polar Molecule_VITAMIN D2 [M-H]	531344	-0.161676	0.8755	9.383e-01	1.360198	1.1004	0.62163
EIC_351	175055	0.120797	0.7156	9.421e-01	0.089505	0.7200	0.97277
Eicosanoid_13,14-dihydro-PGF1a [M-H]	195192	-0.148885	0.8872	9.421e-01	1.286020	1.1799	0.68482
Docosanoid_7(S),17(S)-hydroxy DPA [M-H+Acetate]	263855	0.093882	0.5611	9.421e-01	-1.503246	0.6913	0.34143
Eicosanoid_5S-HpEPE [M-H+Acetate]	402588	-0.131530	0.7558	9.421e-01	-0.376830	0.7752	0.86537
Eicosanoid_Arachidonic Acid [M-H]	529143	-0.102752	0.6036	9.421e-01	1.848580	0.9664	0.41381
VLCDCA_14	537555	0.145977	0.8422	9.421e-01	-0.304417	0.9377	0.90081
VLCDCA_32	537601	0.123406	0.7392	9.421e-01	-0.425327	0.7900	0.86027
Polar Molecule_CORTISOL [M-H+Acetate]	111953	0.137301	0.8970	9.456e-01	-0.425301	0.7287	0.85554
Novel EIC_6	233564	-0.102857	0.6622	9.456e-01	1.695013	0.7332	0.34143
EIC_189	386159	0.166265	1.0809	9.456e-01	0.606604	0.9618	0.83772
FFA_Stearidonic Acid [M-H]	481336	-0.141691	0.9167	9.456e-01	1.877806	1.1384	0.49108
FFA_Docosadienoic Acid† [M-H]	536158	-0.165277	1.0719	9.456e-01	1.011881	1.0739	0.71783
VLCDCA_34	539456	-0.111486	0.7295	9.456e-01	-0.308778	0.7192	0.87402
Eicosanoid_10-Nitrooleate [M-H]	510123	0.096514	0.6599	9.481e-01	-0.269902	0.6441	0.87727
Polar Molecule_CORTISOL [M-H]	111875	0.122714	0.9365	9.555e-01	-0.524981	0.7387	0.80365
Polar Molecule_Tetrahydrocortisol [M-H+Acetate]	123097	-0.117194	0.8785	9.555e-01	-1.094234	0.8773	0.62163
EIC_146	251251	-0.133134	1.0125	9.555e-01	0.397241	1.3208	0.90194
EIC_354	155807	0.119283	0.9443	9.581e-01	-0.701372	1.0549	0.83207
Eicosanoid_15-epi-PGA1 [M-H+Acetate]	244131	0.089876	0.7459	9.595e-01	-0.030386	0.8435	0.99479
Docosanoid_7,8-DiHDPA [M-H+Acetate]	364346	-0.100102	0.8365	9.595e-01	-0.055186	0.6338	0.98454
FFA_Stearic Acid† [M-H+Acetate]	534421	-0.110946	0.9067	9.595e-01	0.676750	1.3889	0.86537
Bile Acid_Ursodeoxycholic acid [M-H]	232041	0.110378	0.9468	9.606e-01	-0.534045	0.9402	0.86027
Novel EIC_40	183709	-0.070736	0.6294	9.627e-01	0.235306	0.7232	0.90081
Putative_D-erythro-Sphingosine-1-phosphate	377404	-0.084719	0.8144	9.683e-01	0.163500	0.6752	0.92584
Eicosanoid_9-oxoOTrE [M-H+Acetate]	368320	-0.080154	0.8726	9.691e-01	-0.879350	1.0531	0.76268
Putative_Dodecylbenzenesulfonic acid	403895	0.092062	1.0167	9.691e-01	-0.092470	0.8825	0.97836
Eicosanoid_14(15) EpETE [M-H]	408497	-0.057017	0.5891	9.691e-01	1.066990	0.4825	0.34143
Polar Molecule_PALMITATE [M-H+Acetate]	527462	-0.103835	1.2005	9.691e-01	1.194902	1.2156	0.70392
Polar Molecule_PALMITATE [M-H+Acetate]	529748	-0.058585	0.6941	9.691e-01	0.109153	0.6527	0.95985
Eicosanoid_DHA [M-H]	529758	0.056549	0.6594	9.691e-01	2.115744	1.1148	0.41381
FAHFA_27	531614	0.103758	1.2139	9.691e-01	1.173953	1.1721	0.70028
VLCDCA_2	533159	-0.073822	0.8730	9.691e-01	0.715378	1.0267	0.81249
FFA_Oleic Acid† [M-H]	534665	-0.073291	0.7418	9.691e-01	1.689075	1.1177	0.55088
VLCDCA_26	539195	-0.060318	0.6855	9.691e-01	-1.106465	0.7198	0.53718
EIC_229	199695	0.048284	0.5929	9.702e-01	-0.305746	0.5495	0.86027
Putative_Codeine-6-b-D-glucuronide	111091	-0.086862	1.1673	9.709e-01	-0.010494	1.0753	0.99725
EIC_189	381176	-0.046426	0.6260	9.709e-01	0.837095	0.7439	0.67362
VLCDCA_11	534221	-0.055904	0.7445	9.709e-01	-1.155476	0.7646	0.55088
FFA_Heptadecanoic Acid† [M-H]	534537	0.053375	0.7235	9.709e-01	0.478885	0.7868	0.84831
EIC_177	262111	-0.039169	0.5630	9.730e-01	-0.171937	0.5535	0.90194
EIC_177	263648	0.057255	0.8451	9.731e-01	-0.191075	0.9294	0.94474
EIC_15	409677	-0.045548	0.8179	9.773e-01	-2.205225	1.0193	0.34143
VLCDCA_2	534195	0.040134	0.7085	9.773e-01	-1.090584	0.8744	0.62163
VLCDCA_28	544581	-0.037166	0.6586	9.773e-01	-1.701351	0.6163	0.31878
Bile Acid_Ursodeoxycholic acid [M-H+Acetate]	244872	0.050088	0.9319	9.775e-01	-1.637429	0.8942	0.42299
Eicosanoid_19(R)-HETE [M-H]	367701	-0.031123	0.6107	9.784e-01	0.520763	0.6610	0.77244
FFA_Pentadecanoic Acid† [M-H+Acetate]	531478	0.037380	0.7583	9.784e-01	1.048880	1.2672	0.76268
Eicosanoid_DHA [M-H+Acetate]	529467	0.028578	0.6317	9.794e-01	1.017112	0.7885	0.62163
VLCDCA_10	534972	0.038830	0.8711	9.794e-01	-0.711281	0.8134	0.75396
Eicosanoid_15d PGJ2 [M-H]	364207	0.024776	0.5848	9.798e-01	0.691224	0.7792	0.74304
FFA_a-linolenic Acid† [M-H]	520524	0.022698	0.6981	9.864e-01	0.856179	0.5885	0.55252
Putative_7a,17a-Dimethyl-5b-androstane-3a,17b-diol glucuronide	199356	-0.062807	2.2908	9.877e-01	-2.626486	2.8771	0.73361
FFA_Docosaenoic Acid† [M-H]	535834	0.035348	1.2782	9.877e-01	-1.597806	1.2373	0.62163
EIC_348	329017	-0.011196	0.5565	9.914e-01	-1.501933	0.6702	0.34143
FFA_a-linolenic Acid† [M-H+Acetate]	520570	0.014604	0.7516	9.914e-01	0.634645	0.6081	0.68554
EIC_177	274066	-0.016331	1.0188	9.927e-01	1.122336	0.7552	0.55252
Eicosanoid_12-HHTrE [M-H+Acetate]	332750	0.031729	2.5063	9.927e-01	-1.374576	1.8404	0.78854
Eicosanoid_5,6-EET [M-H]	473277	-0.008934	0.6900	9.927e-01	0.917043	0.7411	0.62163
Novel EIC_3	375923	0.007624	1.0165	9.952e-01	-0.476846	1.0802	0.87246
FFA_Tricosenoic Acid [M-H+Acetate]	537869	0.004460	0.7381	9.952e-01	0.522746	0.5747	0.73361
